# Supplementary material
Source: publisher figshare collection journal article supplement (https://gsajournals.figshare.com/ndownloader/files/22204425)
Supplement: Supplementary file 1 [file 22204425]

## Sheet: Supplementary Table 3
Marker	Chromosome	Genetic position (cM)	723	515	43	735	645	752	760	770	22	516	729	736	745	753	761	771	27	641	642	737	746	772	31	727	120	738	747	646	763	37	576	739	748	275	764	384	38	730	740	749	385	39	637	741	541	755	640
BobWhite_c1361_1187	1A	42.4	1	1	3	3	3	3	3	3	1	3	1	3	3	3	3	3	3	3	3	3	3	1	3	3	3	3	3	3	1	1	1	1	3	1	1	3	3	3	3	3	1	3	3	3	3	1	3
GENE.0412_338	1A	42.4	3	3	3	3	1	3	3	3	1	1	3	3	3	3	3	3	3	1	3	3	3	3	3	3	3	3	3	3	3	3	3	3	1	3	3	3	1	3	3	3	3	3	1	3	3	3	3
RAC875_c42700_264	1A	42.4	3	3	3	1	1	1	1	3	3	3	3	3	1	3	3	3	1	3	1	1	3	3	3	1	3	1	1	NA	3	3	3	3	3	3	3	1	3	1	1	3	3	3	3	1	1	3	1
wsnp_Ex_c10657_17376448	1A	42.4	1	1	1	3	1	1	1	1	1	1	1	1	1	1	1	3	1	1	3	1	3	1	1	1	1	1	3	3	1	1	1	1	1	1	1	1	1	1	3	1	1	1	1	3	3	1	1
Excalibur_c35316_154	1A	51.48	3	3	1	3	1	1	1	1	3	1	3	1	1	1	1	1	1	1	3	1	1	3	1	1	1	1	1	3	3	3	3	3	1	3	3	1	1	1	3	1	3	1	3	3	3	3	1
wsnp_Ex_c12254_19574891	1A	51.66	1	1	1	1	1	1	1	1	1	1	1	1	1	1	1	1	1	1	3	1	1	1	1	1	1	1	1	3	1	1	1	1	1	1	1	1	1	1	3	1	1	1	3	3	3	1	1
wsnp_Ku_c1818_3557408	1A	51.66	3	3	1	3	3	1	3	1	3	1	3	1	3	1	1	1	3	1	1	3	1	3	1	3	1	3	1	1	3	3	3	3	3	3	3	1	1	3	1	1	3	1	1	1	1	3	3
CAP11_rep_c7878_143	1A	55.28	3	3	1	1	1	1	1	1	1	1	1	1	1	1	1	1	1	1	1	1	1	1	1	1	1	1	1	1	3	3	3	3	1	1	1	1	1	1	1	1	1	1	3	1	1	1	1
RAC875_c95364_259	1A	55.28	3	3	1	3	3	3	3	1	3	1	3	1	3	1	1	1	3	1	3	3	1	3	1	3	1	3	3	3	3	3	3	3	1	3	3	3	1	3	3	1	3	1	1	3	3	3	3
BS00023130_51	1A	60.93	3	3	1	1	1	1	1	1	3	2	3	1	1	1	1	1	1	2	1	1	1	3	1	1	1	1	1	1	3	3	3	3	1	3	3	1	1	1	1	1	3	1	1	1	1	3	1
BobWhite_c20902_177	1A	66.54	3	3	3	3	3	3	1	3	3	3	3	3	3	3	3	3	3	3	1	3	3	3	3	3	3	3	3	1	3	3	3	3	3	3	3	1	3	3	1	3	3	3	1	1	1	3	1
wsnp_CAP11_c710_458019	1A	75.37	3	3	3	3	3	3	3	3	3	3	3	3	3	3	3	3	3	3	1	3	3	3	3	3	3	3	3	1	3	3	3	3	3	3	3	3	3	3	1	3	3	3	3	1	1	3	3
GENE.1118_58	1A	78.24	1	1	1	1	1	1	1	1	3	1	3	1	1	1	1	1	1	1	1	1	1	3	1	1	1	1	1	1	1	1	1	1	1	3	3	1	1	1	1	1	3	1	1	1	1	3	1
Kukri_rep_c102231_265	1A	78.24	3	3	1	1	1	1	1	1	3	1	3	1	1	1	1	1	1	1	1	1	1	3	1	1	1	1	1	1	3	3	3	3	1	3	3	1	1	1	1	1	3	1	1	1	1	3	1
RAC875_c30657_82	1A	78.24	1	1	1	1	1	1	1	1	1	1	3	1	1	1	1	1	1	1	1	1	1	3	1	1	1	1	1	1	1	1	1	1	1	3	3	1	1	1	1	1	3	1	1	1	1	3	1
BS00010128_51	1A	83.59	3	3	1	3	1	1	3	3	3	1	3	1	1	3	3	1	1	3	3	1	1	3	1	1	1	1	3	3	3	3	3	3	1	3	3	1	3	1	3	3	3	1	1	3	3	3	3
Excalibur_c5139_198	1A	83.59	1	1	1	3	1	1	3	3	1	1	1	1	1	3	3	1	1	3	3	1	1	1	1	1	1	1	3	3	1	1	1	1	1	1	1	1	3	1	3	3	1	1	1	3	3	1	3
RAC875_c1710_376	1A	84.44	1	1	3	3	1	3	3	3	1	3	1	3	1	3	3	3	1	3	3	1	3	1	3	1	3	1	3	3	1	1	1	1	1	1	1	3	3	1	3	3	1	3	3	3	3	1	3
Tdurum_contig46413_779	1A	89.29	3	3	3	3	3	3	3	3	3	3	3	3	3	3	3	3	3	3	3	3	3	3	3	3	3	3	3	3	3	3	3	3	3	3	3	3	3	3	3	3	3	3	3	3	3	3	3
BS00110709_51	1A	89.89	3	3	3	3	3	3	3	3	3	3	3	3	3	3	3	3	3	3	3	3	3	3	3	3	3	3	3	3	3	3	3	3	3	3	3	3	3	3	3	3	3	3	1	3	3	3	3
Excalibur_c21298_515	1A	89.89	3	3	3	1	3	3	1	1	3	3	3	3	3	1	1	3	3	1	1	3	3	3	3	3	3	3	1	1	3	3	3	3	3	3	3	3	1	3	1	1	3	3	3	1	1	3	1
IAAV8297	1A	89.89	1	1	1	3	1	1	3	3	1	1	1	1	1	3	3	1	1	3	3	1	1	1	1	1	1	1	3	3	1	1	1	1	1	1	1	1	3	1	3	3	1	1	1	3	3	1	NA
JG_c936_115	1A	89.89	1	3	3	1	1	3	3	3	1	1	1	3	3	1	3	3	1	3	3	1	3	1	1	1	1	1	1	1	1	3	1	3	3	3	3	1	1	1	3	1	1	1	1	3	3	3	1
RAC875_c18640_821	1A	89.89	1	1	1	3	1	1	3	3	1	1	1	1	1	3	3	1	1	3	3	1	1	1	1	1	1	1	3	3	1	1	1	1	1	1	1	1	3	1	3	3	1	1	1	3	3	1	3
RAC875_c63624_1002	1A	89.89	3	3	3	3	3	3	3	3	1	1	3	3	3	3	3	3	3	1	3	3	3	3	3	3	3	3	3	3	3	3	3	3	1	3	3	3	3	3	3	3	3	3	1	3	3	3	3
Tdurum_contig43943_56	1A	89.89	3	3	3	1	3	3	1	1	3	3	3	3	3	1	1	3	3	1	1	3	3	3	3	3	3	3	1	1	3	3	3	3	3	3	3	3	1	3	1	1	3	3	3	1	1	3	1
Ex_c4876_1221	1A	95.68	1	1	1	1	1	3	1	1	1	1	1	1	1	1	1	1	1	1	1	1	1	1	3	1	1	1	1	1	1	1	1	NA	1	1	1	3	1	1	1	1	1	1	3	1	1	1	1
Kukri_c29655_239	1A	95.68	3	3	3	1	3	3	1	1	3	3	3	3	3	1	1	3	3	1	1	3	3	3	3	3	3	3	1	1	3	3	3	3	3	3	3	3	1	3	1	1	3	3	3	1	1	3	1
Kukri_c46939_83	1A	95.68	3	3	3	1	3	3	1	1	3	3	3	3	3	1	1	3	3	2	1	3	3	3	3	3	3	3	1	1	3	3	3	3	3	3	3	3	1	3	1	1	3	3	3	1	1	3	1
RAC875_c34888_65	1A	107.14	3	3	3	3	1	1	3	1	3	3	3	1	1	1	3	3	1	3	3	1	3	3	3	1	3	1	3	3	3	3	3	3	1	3	3	1	1	1	3	1	3	3	1	3	3	3	3
BobWhite_c1265_607	1A	108.79	1	1	1	1	1	1	1	3	3	1	3	3	3	3	1	1	3	1	1	3	1	3	1	3	3	3	1	1	1	1	1	1	3	3	3	1	3	3	1	3	3	1	1	1	1	3	1
BobWhite_c34604_222	1A	108.79	3	3	3	3	3	3	3	3	1	3	1	3	3	3	3	3	3	3	3	3	3	1	3	3	3	3	3	3	3	3	3	3	3	1	1	3	3	3	3	3	1	3	3	3	3	1	3
BS00069300_51	1A	108.79	3	3	1	1	1	1	1	1	3	1	3	1	1	1	1	1	1	1	1	1	1	3	1	1	1	1	1	1	3	3	3	3	1	3	3	1	1	1	1	1	3	1	1	1	1	3	1
BS00069301_51	1A	108.79	3	3	1	1	1	1	1	1	3	1	3	1	1	1	1	1	1	1	1	1	1	3	1	1	1	1	1	1	3	3	3	3	1	3	3	1	1	1	1	1	3	1	1	1	1	3	1
Excalibur_c12789_1184	1A	108.79	3	3	3	3	3	3	3	3	1	3	1	3	3	3	3	3	3	3	3	3	3	1	3	3	3	3	3	3	3	3	3	3	3	1	1	3	3	3	3	3	1	3	3	3	3	1	3
Excalibur_c47455_133	1A	108.79	3	3	3	3	3	3	3	3	1	3	1	3	3	3	3	3	3	3	3	3	3	1	3	3	3	3	3	3	3	3	3	3	3	1	1	3	3	3	3	3	1	3	3	3	3	1	3
IAAV6115	1A	108.79	NA	1	1	1	1	1	1	1	3	1	3	1	1	1	1	1	1	1	1	1	1	3	1	1	1	1	1	1	1	NA	1	NA	1	3	3	1	1	1	1	1	3	1	1	1	1	3	1
Kukri_c17177_2181	1A	108.79	3	3	3	3	3	3	3	3	NA	3	1	3	3	3	3	3	3	3	3	3	3	NA	3	3	3	3	3	3	3	3	3	3	3	1	1	3	3	3	3	3	1	3	3	3	3	1	3
Kukri_c2121_1994	1A	108.79	3	3	3	3	3	3	3	1	1	3	1	3	1	1	3	3	1	3	3	1	3	1	3	1	3	1	3	3	3	3	3	3	1	1	1	3	1	1	3	1	1	3	3	3	3	1	3
Kukri_c4126_208	1A	108.79	3	3	NA	3	3	3	3	1	1	3	1	3	1	1	3	3	1	3	3	1	3	1	3	1	3	1	3	3	3	3	3	3	1	1	1	3	1	1	3	1	1	3	3	3	3	1	3
Kukri_c45607_199	1A	108.79	3	3	1	1	3	1	1	1	3	1	3	1	1	1	1	1	1	1	1	1	1	3	1	1	1	1	1	1	3	3	3	3	1	3	3	1	1	1	1	1	3	1	1	1	1	3	1
Kukri_rep_c69910_1153	1A	108.79	1	1	1	1	1	1	1	1	3	1	3	1	1	1	1	1	1	1	1	1	1	3	1	1	1	1	1	1	1	1	1	1	1	3	3	1	1	1	1	1	3	1	1	1	1	NA	1
RAC875_c33470_345	1A	108.79	3	3	1	1	3	1	1	1	1	1	1	1	1	1	1	1	1	1	1	1	1	1	1	1	1	1	1	1	3	3	3	3	1	1	1	1	1	1	1	1	1	1	1	1	1	1	1
TA002993.0179.w	1A	108.79	3	3	3	3	3	3	3	3	1	3	1	3	3	3	3	3	3	3	3	3	3	1	3	3	3	3	3	3	3	3	3	3	3	1	1	3	3	3	3	3	1	3	3	3	3	1	3
tplb0061f07_961	1A	108.79	3	3	3	3	3	3	3	1	1	3	1	3	1	1	3	3	1	3	3	1	3	1	3	1	3	1	3	3	3	3	3	3	1	1	1	3	1	1	3	1	1	3	3	3	3	1	3
wsnp_Ex_c38203_45790396	1A	108.79	3	3	1	1	1	1	1	1	3	1	3	1	1	NA	1	1	1	1	1	1	1	3	1	1	1	1	1	1	3	3	3	3	1	3	3	1	1	1	1	1	3	1	1	1	1	3	1
wsnp_Ex_c7965_13519586	1A	108.79	3	3	3	3	3	3	3	1	1	3	1	3	1	1	3	3	1	3	3	1	3	1	3	1	3	1	3	3	3	3	3	3	1	1	1	3	1	1	3	1	1	3	3	3	3	1	3
Excalibur_rep_c113950_132	1A	108.8	1	1	1	1	1	1	1	3	3	1	3	1	3	3	1	1	3	1	1	3	1	3	1	3	1	3	1	1	1	1	1	1	3	3	3	1	3	3	1	3	3	1	1	1	1	3	1
BS00103478_51	1A	110.09	3	3	3	1	3	3	3	3	3	3	3	1	3	3	1	3	3	1	1	3	3	3	3	3	1	3	1	1	3	3	3	3	3	3	3	3	3	3	1	3	3	3	3	1	1	3	3
Excalibur_c25175_512	1A	110.09	1	1	1	1	3	3	1	3	3	1	3	1	3	3	1	1	3	1	1	3	1	3	3	3	1	3	1	1	1	1	1	1	3	3	3	3	3	3	1	3	3	1	3	1	1	3	1
wsnp_Ex_c19717_28713417	1A	113.43	1	1	1	1	1	3	1	1	1	1	1	1	1	1	1	1	1	1	1	1	1	1	1	1	1	1	1	1	1	1	1	1	1	1	1	3	1	1	1	1	1	1	1	1	1	1	1
BS00022977_51	1A	117.68	1	1	3	3	3	3	3	1	1	3	1	1	1	1	3	3	1	3	3	1	3	1	3	1	1	1	3	3	NA	1	1	NA	1	1	1	3	1	1	3	1	1	3	3	3	3	1	3
BS00082266_51	1A	117.68	3	3	3	3	3	3	3	3	NA	3	1	1	1	3	3	3	3	3	3	3	3	1	3	1	3	3	3	3	3	3	3	3	NA	1	1	3	3	3	3	3	1	3	3	3	3	1	3
IACX11001	1A	117.68	1	1	1	1	1	3	1	1	1	1	1	1	1	1	1	1	1	1	1	1	1	1	3	1	1	1	1	1	1	1	1	1	1	1	1	3	1	1	1	1	1	1	3	1	1	1	1
Kukri_c11891_1015	1A	117.68	1	1	1	1	1	1	1	3	3	1	3	3	3	3	1	1	3	1	1	3	1	3	1	3	3	3	1	1	1	1	1	1	3	3	3	1	3	3	1	3	3	1	1	1	1	3	1
Kukri_rep_c108031_378	1A	117.68	1	1	3	3	3	3	3	1	1	3	1	1	1	1	3	3	1	3	3	1	3	1	3	1	1	1	3	3	1	1	1	1	1	1	1	3	1	1	3	1	1	3	3	3	3	1	3
Tdurum_contig11756_1415	1A	117.68	1	1	1	1	1	1	1	1	3	1	3	3	3	1	1	1	1	1	1	1	1	3	1	3	1	1	1	1	1	1	1	1	3	3	3	1	1	1	1	1	3	1	1	1	1	3	1
BS00003761_51	1A	133.63	1	1	1	1	1	1	1	1	3	1	3	3	3	1	1	1	1	1	1	1	1	3	1	3	1	1	1	1	1	1	1	1	3	3	3	1	1	1	1	1	3	1	1	1	1	3	1
BS00003802_51	1A	133.63	1	1	1	1	1	1	1	1	3	1	3	3	3	1	1	1	1	1	1	1	1	3	1	3	1	1	1	1	1	1	1	1	3	3	3	1	1	1	1	1	3	1	1	1	1	3	1
RAC875_c54245_88	1A	133.63	3	3	3	3	3	3	3	3	1	3	1	1	1	3	3	3	3	3	3	3	3	1	3	1	3	3	3	3	3	3	3	3	1	1	1	3	3	3	3	3	1	3	3	3	3	1	3
Tdurum_contig29484_628	1A	133.63	3	3	1	1	1	1	1	1	3	1	3	3	3	1	1	1	1	1	1	1	1	3	1	3	3	1	1	1	3	3	3	3	3	3	3	1	1	1	1	1	3	1	1	1	1	3	1
Tdurum_contig61492_458	1A	133.63	3	3	3	3	3	3	3	3	1	3	1	1	1	3	3	3	3	3	3	3	3	1	3	1	3	3	3	3	3	3	3	3	1	1	1	3	3	3	3	3	1	3	3	3	3	1	3
Tdurum_contig61492_684	1A	133.63	3	3	3	3	3	3	3	3	1	3	1	1	1	3	3	3	3	3	3	3	3	1	3	1	3	3	3	3	3	3	3	3	1	1	1	3	3	3	3	3	1	3	3	3	3	1	3
RAC875_c37934_225	1A	141.85	1	1	1	1	1	1	1	1	3	3	1	1	1	1	1	1	1	3	1	NA	1	1	1	1	1	1	1	1	1	1	1	1	3	1	1	1	1	1	1	1	1	1	3	1	1	1	1
RAC875_c56994_301	1A	141.85	3	3	3	3	3	3	3	3	3	1	1	3	1	1	1	3	1	3	1	3	1	1	1	3	3	1	1	3	3	3	3	1	3	3	3	3	3	3	1	1	1	3	1	1	3	1	3
BS00064608_51	1A	149.6	3	3	1	1	1	1	1	1	1	1	1	1	1	1	1	1	1	1	1	1	1	1	1	1	1	1	1	1	3	3	3	3	1	1	1	1	1	1	1	1	1	1	1	1	1	1	1
Excalibur_c110483_103	1A	149.6	3	3	1	1	1	1	1	1	1	1	1	1	1	1	1	1	1	1	1	1	1	1	1	1	1	1	1	1	3	3	3	3	1	1	1	1	1	1	1	1	1	1	1	1	1	1	1
Excalibur_c18694_273	1A	149.6	3	3	1	1	1	1	1	1	1	1	1	1	1	1	1	1	1	1	1	1	1	1	1	1	1	1	1	1	3	3	3	3	1	1	1	1	1	1	1	1	1	1	1	1	1	1	1
Excalibur_rep_c92985_510	1A	149.6	1	1	3	3	3	3	3	3	3	3	3	3	3	3	3	3	3	3	3	3	3	3	3	3	3	3	3	3	1	1	1	1	3	3	3	3	3	3	3	3	3	3	3	3	3	3	3
Excalibur_rep_c92985_618	1A	149.6	3	3	1	1	1	1	1	1	1	1	1	1	1	1	1	1	1	1	1	1	1	1	1	1	1	1	1	1	3	3	3	3	1	1	1	1	1	1	1	1	1	1	1	1	1	1	1
GENE.0249_161	1A	149.6	3	3	1	1	1	1	1	1	3	3	1	1	1	1	1	1	1	3	1	1	1	1	1	1	1	1	1	1	3	3	3	1	3	1	1	1	1	1	1	1	1	1	3	1	1	1	1
Kukri_c24144_1568	1A	149.6	3	3	1	1	1	1	1	1	1	1	1	1	1	1	1	3	1	1	1	1	3	1	1	1	1	1	1	1	3	3	3	3	1	1	1	1	1	1	1	1	1	1	1	1	1	1	1
RAC875_c37934_285	1A	149.6	3	3	3	3	3	3	3	3	3	3	3	3	3	3	3	3	3	3	3	3	3	3	3	3	3	3	3	3	3	3	3	3	3	3	3	3	3	3	3	3	3	3	3	3	3	3	3
Ex_c3941_906	1A	151.14	3	3	1	1	1	3	3	3	3	1	3	3	3	3	1	3	3	1	3	3	3	3	1	3	3	3	1	3	3	3	3	3	3	3	3	3	3	3	3	3	3	3	3	3	1	3	3
D_contig08749_250	1A	151.72	1	1	1	1	1	3	1	3	1	1	1	3	1	1	1	1	1	1	1	1	3	1	1	1	1	1	3	1	1	1	1	1	3	1	1	3	1	3	1	3	3	3	3	1	1	1	1
Excalibur_c11941_612	1A	156.43	3	3	1	1	1	1	1	1	3	3	1	3	1	1	1	3	3	1	3	1	3	3	3	3	1	1	1	3	3	3	3	3	1	1	1	1	1	1	3	1	3	1	1	3	3	1	1
Excalibur_c10689_254	1A	157.77	1	1	1	1	1	1	1	1	1	1	1	1	1	1	3	3	1	1	1	1	3	1	3	1	3	1	1	1	1	1	1	1	1	1	1	3	1	1	1	1	1	1	1	1	3	1	1
Kukri_c7436_2259	1A	157.77	1	1	3	3	1	3	3	1	1	1	3	1	3	1	3	1	1	3	1	3	1	1	1	1	3	1	1	1	1	1	1	1	1	3	3	3	1	3	1	3	1	3	3	1	1	3	3
wsnp_Ex_c5323_9408829	1A	157.77	3	3	1	1	3	1	1	3	3	3	1	3	1	3	1	3	3	1	3	1	3	3	3	3	1	3	3	3	3	3	3	3	3	1	1	1	3	1	3	1	3	1	1	3	3	1	1
Excalibur_c11941_675	1A	158.24	3	3	3	3	3	3	3	3	1	1	3	1	3	3	3	3	1	3	1	3	3	1	1	1	3	3	3	1	3	3	3	3	3	3	3	3	3	3	1	3	1	3	3	1	1	3	3
Kukri_c16098_95	1A	159.05	1	1	1	1	3	1	1	3	3	3	1	3	1	3	1	3	3	1	3	1	3	3	3	3	1	3	3	3	1	1	1	1	3	1	1	1	3	1	3	1	3	1	1	3	3	1	1
wsnp_Ex_c10783_17554146	1A	159.05	1	1	1	1	3	1	1	3	3	3	1	3	1	3	1	3	3	1	3	1	3	3	3	3	1	3	3	3	1	1	1	1	3	1	1	1	3	1	3	1	3	1	1	3	3	1	1
Kukri_c48959_528	1A	160.39	1	1	3	3	3	3	3	3	3	3	3	3	3	3	3	3	3	3	3	3	3	3	3	3	3	3	3	3	1	1	1	1	3	3	3	3	3	3	3	3	3	3	3	3	3	3	3
RAC875_c1825_188	1A	160.39	1	1	3	3	1	3	3	1	1	1	3	1	3	1	3	3	1	3	1	3	3	1	1	1	3	1	1	1	1	1	1	1	1	3	3	3	1	3	1	3	1	3	3	1	1	3	3
RAC875_c8245_272	1A	160.39	3	3	3	3	1	3	3	1	1	1	3	1	3	1	3	3	1	3	1	3	3	1	1	1	3	1	1	1	3	3	3	3	1	3	3	3	1	3	1	3	1	3	3	1	1	3	3
TA006139.0953	1A	160.39	3	3	3	3	1	3	3	1	1	1	3	1	3	1	3	3	1	3	1	3	3	1	1	1	3	1	1	1	3	3	3	3	1	3	3	3	1	3	1	3	1	3	3	1	1	3	3
wsnp_Ex_c5323_9409407	1A	160.39	3	3	3	3	1	3	3	1	1	1	3	1	3	1	3	3	1	3	1	3	3	1	1	1	3	1	1	1	3	3	3	3	1	3	3	3	1	3	1	3	1	3	3	1	1	3	3
wsnp_Ku_rep_c101175_88380491	1A	160.39	1	1	1	1	3	1	1	3	3	3	1	3	1	3	1	1	3	1	3	1	1	3	3	3	1	3	3	3	1	1	1	1	3	1	1	1	3	1	3	1	3	1	1	3	3	1	1
BobWhite_c48591_394	1A	162.26	3	3	3	1	1	3	1	1	1	1	1	1	1	1	3	1	1	3	1	1	1	1	3	1	3	1	1	1	3	3	3	3	1	1	1	3	1	1	1	1	1	1	3	1	3	1	1
Excalibur_c7026_2635	1A	162.26	3	3	1	3	3	1	3	3	3	3	3	3	3	3	1	3	3	1	3	3	3	3	1	3	1	3	3	3	3	3	3	3	3	3	3	1	3	3	3	3	3	3	1	3	1	3	3
Kukri_c13136_1363	1A	162.26	3	3	3	1	1	3	1	1	1	1	1	1	1	1	3	1	1	3	1	1	1	1	3	1	3	1	1	1	3	3	3	3	1	1	1	3	1	1	1	1	1	1	3	1	3	1	1
RAC875_c14926_589	1A	162.38	1	1	1	1	3	1	3	3	3	3	1	3	1	3	3	1	3	1	3	1	1	3	3	3	3	3	3	3	1	1	1	1	3	1	1	3	3	1	3	1	3	1	1	3	3	1	3
Kukri_c22508_119	1A	165.56	1	1	1	1	3	3	1	1	3	3	1	3	1	3	1	1	3	3	3	1	1	3	1	3	1	3	3	3	1	1	1	1	3	1	1	1	3	1	3	1	3	1	1	3	1	1	1
BobWhite_c4499_153	1A	170.38	3	3	3	3	1	3	1	1	3	3	3	3	3	1	3	3	3	3	3	3	3	3	1	3	1	3	1	3	3	3	3	3	1	3	3	1	1	3	3	3	3	3	1	3	1	3	1
BS00065005_51	1A	170.38	3	3	3	3	3	3	1	3	1	1	3	1	3	3	3	3	1	3	1	3	3	1	3	1	3	1	3	1	3	3	3	3	3	3	3	3	3	3	1	3	1	3	3	1	3	3	1
GENE.0002_856	1A	170.38	1	1	3	3	1	1	1	3	3	3	3	1	3	1	3	1	3	1	3	3	1	3	3	3	3	3	1	3	1	1	1	1	1	3	3	3	1	3	3	3	3	3	3	3	3	3	1
RAC875_rep_c107325_644	1A	170.38	1	1	3	3	1	1	1	3	3	3	3	1	3	1	3	1	3	1	3	3	1	3	3	3	3	3	1	3	1	1	1	1	1	3	3	3	1	3	3	3	3	3	1	3	3	3	1
Kukri_c31964_109	1A	173.23	3	3	3	3	1	3	1	3	1	1	3	1	3	1	3	1	1	3	1	3	1	1	3	1	3	1	1	1	3	3	3	3	1	3	3	3	1	3	1	3	1	3	3	1	3	3	1
Tdurum_contig61515_259	1A	173.23	3	3	1	1	3	1	3	3	1	1	3	1	1	1	3	3	1	1	1	1	3	1	1	1	3	1	1	1	3	3	3	3	1	1	1	1	1	1	1	1	1	1	3	1	1	1	3
Kukri_c46010_146	1A	174.13	3	3	3	3	1	1	1	1	3	3	3	1	3	1	3	1	3	1	3	3	1	3	1	3	1	3	1	3	3	3	3	3	1	3	3	1	1	3	3	3	3	3	1	3	1	3	1
Kukri_c82555_88	1A	175.43	3	3	1	1	3	3	3	3	1	1	1	3	1	3	1	3	1	3	1	1	3	1	3	1	3	1	3	1	3	3	3	3	3	1	1	3	3	1	1	1	1	1	3	1	3	1	3
Tdurum_contig29280_216	1A	175.43	3	3	1	1	3	3	3	3	3	3	1	3	1	3	1	3	3	3	3	1	3	1	3	1	3	3	3	3	3	3	3	3	3	1	1	3	3	1	1	1	3	1	3	3	3	1	3
Tdurum_contig50355_269	1A	175.43	3	3	1	1	3	3	3	3	3	3	1	3	1	3	1	3	3	3	3	1	3	1	3	1	3	3	3	3	3	3	3	3	3	1	1	3	3	1	1	1	3	1	3	3	3	1	3
Excalibur_c46833_204	1A	178.82	1	1	1	1	3	1	3	3	3	3	1	3	1	1	1	1	3	3	3	3	1	1	1	1	3	3	1	3	1	1	1	1	1	1	1	3	1	1	1	1	3	1	1	3	1	1	3
Kukri_c29134_108	1A	178.82	1	1	3	3	3	1	3	3	1	1	1	1	3	3	1	1	3	1	1	1	1	1	3	3	3	3	3	1	1	1	1	1	3	3	1	3	3	3	3	3	1	3	1	1	3	1	3
RAC875_c89908_105	1A	178.82	3	3	1	1	3	1	3	3	3	3	1	3	1	1	1	1	3	3	3	3	1	1	1	1	3	3	1	3	3	3	3	3	1	1	1	3	1	1	1	1	3	1	1	3	1	1	3
Kukri_c31964_56	1A	178.88	1	1	1	1	3	1	3	1	3	3	1	3	1	3	1	3	3	1	3	1	3	3	1	3	1	3	3	3	1	1	1	1	3	1	1	1	3	1	3	1	3	1	1	3	1	1	3
Tdurum_contig8382_300	1A	178.88	3	3	1	1	3	1	3	1	3	3	1	3	1	3	1	3	3	1	3	1	3	3	1	3	1	3	3	3	3	3	3	3	3	1	1	1	3	1	3	1	3	1	1	3	1	1	3
Ra_c22663_367	1A	181.6	3	3	3	3	3	3	3	1	3	3	3	3	3	3	3	1	3	3	3	3	1	3	3	3	1	3	3	3	3	3	3	3	3	3	3	3	3	3	3	3	3	3	1	3	3	3	3
Excalibur_c7237_1084	1A	184.34	1	1	3	3	1	3	1	1	3	3	1	3	3	1	1	1	3	3	3	3	1	3	3	3	1	3	1	3	1	1	1	1	1	3	3	3	1	3	3	3	3	3	1	3	3	3	1
Excalibur_c7237_1208	1A	184.34	1	1	3	3	1	3	1	1	3	3	1	3	3	1	1	1	3	3	3	3	1	3	3	3	1	3	1	3	1	1	1	1	1	3	3	3	1	3	3	3	3	3	1	3	3	3	1
Kukri_c7579_559	1A	184.34	1	1	3	3	1	3	1	1	3	3	1	NA	3	1	1	1	3	3	3	3	1	3	3	3	1	3	1	3	1	1	1	1	1	3	3	3	1	3	3	3	3	3	1	3	3	3	1
RAC875_c10090_963	1A	184.34	3	3	1	1	3	1	3	3	1	1	3	1	1	3	3	3	1	1	1	1	3	1	1	1	3	1	3	1	3	3	3	3	3	1	1	1	3	1	1	1	1	1	3	1	1	1	3
RAC875_rep_c111911_116	1A	184.34	3	3	1	1	3	1	3	3	1	1	3	1	1	3	3	3	1	1	1	1	3	1	1	1	3	1	3	1	3	3	3	3	3	1	1	1	3	1	1	1	1	1	3	1	1	1	3
Tdurum_contig61515_522	1A	184.34	3	3	1	1	3	1	3	3	1	1	3	1	1	1	3	3	1	1	1	1	3	1	1	1	3	1	1	1	3	3	3	3	1	1	1	1	1	1	1	1	1	1	3	1	1	1	3
TA003773.0807	1A	191.58	3	3	1	1	3	3	3	3	3	3	3	3	1	1	3	1	3	3	3	3	1	1	3	1	3	3	1	3	3	3	3	3	1	NA	3	3	1	1	1	1	3	1	3	3	3	3	3
BS00013227_51	1A	202.05	1	1	1	1	3	3	1	1	3	3	3	3	3	1	3	1	1	1	3	3	1	3	1	1	1	1	1	3	1	1	1	1	1	1	3	1	1	1	1	1	3	1	3	3	1	3	1
BS00022870_51	1A	202.05	3	3	3	3	1	1	3	3	1	1	1	1	1	3	1	3	3	3	1	1	3	1	3	3	3	3	3	1	3	3	3	3	3	3	1	3	3	3	3	3	1	3	1	1	3	1	3
BS00067339_51	1A	202.05	3	3	3	3	1	3	1	1	3	3	3	3	3	1	3	3	3	3	3	3	3	3	1	3	1	3	1	3	3	3	3	3	1	3	3	1	1	3	3	3	3	3	3	3	1	3	1
BS00110151_51	1A	202.05	1	1	1	1	1	3	1	1	3	3	3	3	1	1	3	3	1	3	3	3	3	3	1	1	1	1	1	3	1	1	1	1	1	1	3	1	1	1	1	1	3	1	3	3	1	3	1
Excalibur_c12215_352	1A	202.05	3	3	3	3	1	3	1	1	3	3	3	3	3	1	3	1	3	1	3	3	1	3	1	3	1	3	1	3	3	3	3	3	1	3	3	1	1	3	3	3	3	3	3	3	1	3	1
Excalibur_c47654_70	1A	202.05	1	1	3	1	3	3	1	1	3	3	3	3	3	1	3	3	1	3	3	3	3	3	1	1	1	1	1	3	1	1	1	1	1	1	3	1	1	1	1	1	3	1	3	3	1	3	1
Excalibur_c65961_156	1A	202.05	3	3	1	1	1	1	1	1	1	1	1	1	1	1	1	1	1	1	1	1	1	1	1	1	1	1	1	1	3	3	3	3	1	1	1	1	1	1	1	1	1	1	1	1	1	1	1
IACX5982	1A	202.05	3	3	1	3	1	1	3	3	1	1	1	1	1	3	1	3	3	3	1	1	3	1	3	3	3	3	3	1	3	3	3	3	3	3	1	3	3	3	3	3	1	3	1	1	3	1	3
Kukri_c23985_229	1A	202.05	1	1	3	1	3	3	1	1	3	3	3	3	3	1	3	3	1	3	3	3	3	3	1	1	1	1	1	3	1	1	1	1	1	1	3	1	1	1	1	1	3	1	3	3	1	3	1
Kukri_c3150_341	1A	202.05	3	3	3	3	1	1	3	3	1	1	1	1	1	3	1	3	3	3	1	1	3	1	3	3	3	3	3	1	3	3	3	3	3	3	1	3	3	3	3	3	1	3	1	1	3	1	3
Kukri_c49776_192	1A	202.05	3	3	1	1	1	3	1	1	3	3	3	3	1	1	3	3	1	3	3	3	3	3	1	1	1	1	1	3	3	3	3	3	1	1	3	1	1	1	1	1	3	1	3	3	1	3	1
Kukri_rep_c107771_588	1A	202.05	3	3	1	1	3	3	1	1	3	3	3	3	3	1	3	3	1	3	3	3	3	3	1	1	1	1	1	3	3	3	3	3	1	1	3	1	1	1	1	1	3	1	3	3	1	3	1
Ra_c27593_460	1A	202.05	3	3	3	3	3	1	3	3	1	1	1	1	3	3	1	3	3	3	1	1	3	3	3	3	3	3	3	1	3	3	3	3	3	3	1	3	3	3	3	3	1	3	1	1	3	1	3
RAC875_c65431_351	1A	202.05	1	1	1	1	1	3	1	1	3	3	3	3	1	1	3	1	1	1	3	3	1	3	1	1	1	1	1	3	1	1	1	1	1	1	3	1	1	1	1	1	3	1	3	3	1	3	1
Tdurum_contig97688_186	1A	202.05	3	3	3	3	3	3	3	3	3	3	3	3	3	3	3	3	3	3	3	3	3	3	3	3	3	3	3	3	3	3	3	3	3	3	3	3	3	3	3	3	3	3	3	3	3	3	3
IAAV2888	1A	204.76	1	1	3	3	1	1	1	1	1	1	1	1	1	1	1	1	3	1	1	1	1	1	1	3	1	3	1	1	1	1	1	1	1	3	1	1	1	1	1	3	1	3	1	1	1	1	1
RAC875_c46269_387	1A	206.52	1	1	1	1	3	3	3	3	3	3	1	3	3	3	1	3	1	1	3	3	1	3	3	1	3	1	3	3	1	1	1	1	3	1	1	3	3	3	3	1	3	1	1	3	3	1	3
Ex_c68770_506	1A	207.64	3	3	1	1	3	3	3	3	3	3	3	3	3	3	3	3	1	3	3	3	3	3	3	1	3	1	3	3	3	3	3	3	3	1	3	3	3	3	3	1	3	1	3	3	3	3	3
RAC875_c37183_331	1A	212.53	3	3	3	3	1	1	1	3	1	1	3	1	1	1	3	3	3	3	1	1	3	1	1	3	3	3	1	1	3	3	3	3	1	1	3	1	1	1	1	3	1	3	3	1	1	3	1
wsnp_Ex_c2181_4089788	1A	212.53	3	3	3	3	1	1	1	3	1	1	3	1	1	1	3	3	3	3	1	1	3	1	1	3	3	3	1	1	3	3	3	3	1	1	3	1	1	1	1	3	1	3	3	1	1	3	1
wsnp_Ku_rep_c107796_93118214	1A	214.66	3	3	1	1	3	3	3	1	3	3	1	3	3	3	1	1	1	1	3	3	1	3	3	1	1	1	3	3	3	3	3	3	3	3	1	3	3	3	3	1	3	1	1	3	3	1	3
RAC875_c6664_63	1A	215.75	1	1	1	1	1	1	1	1	1	1	1	1	3	1	1	3	1	1	1	1	3	1	1	1	1	1	1	1	1	1	1	1	1	1	1	1	1	3	1	1	1	1	1	1	1	1	1
BobWhite_c18773_75	1A	216.46	1	1	1	1	3	3	3	3	3	3	3	3	3	3	3	1	1	1	3	3	1	3	3	1	3	1	3	3	1	1	1	1	3	3	3	3	3	3	3	1	3	1	3	3	3	3	3
BobWhite_c20703_141	1A	216.46	3	3	1	3	1	1	1	1	1	1	1	1	1	1	1	3	3	3	1	1	3	1	1	3	1	3	1	1	3	3	3	3	1	1	1	1	1	1	1	3	1	3	1	1	1	1	1
BobWhite_c24113_529	1A	216.46	3	3	3	3	1	1	1	1	1	1	1	1	1	1	1	3	3	3	1	1	3	1	1	3	1	3	1	1	3	3	3	3	1	1	1	1	1	1	1	3	1	3	1	1	1	1	1
BobWhite_c31155_350	1A	216.46	1	1	3	1	3	3	3	3	3	3	3	3	3	3	3	1	1	1	3	3	1	3	3	1	3	1	3	3	1	1	1	1	3	3	3	3	3	3	3	1	3	1	3	3	3	3	3
BobWhite_c44224_71	1A	216.46	3	3	1	3	1	1	1	1	1	1	1	1	1	1	1	3	3	3	1	1	3	1	1	3	1	3	1	1	3	3	3	3	1	1	1	1	1	1	1	3	1	3	1	1	1	1	1
BobWhite_c45409_389	1A	216.46	3	3	3	1	3	3	3	3	3	3	3	3	3	3	3	1	1	1	3	3	1	3	3	1	3	1	3	3	3	3	3	3	3	3	3	3	3	3	3	1	3	1	3	3	3	3	3
BS00003758_51	1A	216.46	1	1	3	1	3	3	3	3	3	3	3	3	3	3	3	1	1	1	3	3	1	3	3	1	3	1	3	3	1	1	1	1	3	3	3	3	3	3	3	1	3	1	3	3	3	3	3
BS00010004_51	1A	216.46	3	3	3	1	3	3	3	3	3	3	3	3	3	3	3	1	1	1	3	3	1	3	3	1	3	1	3	3	3	3	3	3	3	3	3	3	3	3	3	1	3	1	3	3	3	3	3
BS00021730_51	1A	216.46	3	3	1	3	1	1	1	1	1	1	1	1	1	1	1	3	3	3	1	1	3	1	1	3	1	3	1	1	3	3	3	3	1	1	1	1	1	1	1	3	1	3	1	1	1	1	1
BS00021878_51	1A	216.46	3	3	3	1	3	3	3	3	1	3	3	1	1	3	3	1	1	3	1	1	1	1	1	1	3	1	3	1	3	3	3	3	3	3	3	1	1	1	1	1	1	3	3	1	1	3	3
BS00021895_51	1A	216.46	1	1	3	1	3	3	3	3	3	3	3	3	3	3	3	1	1	1	3	3	1	3	3	1	3	1	3	3	1	1	1	NA	3	3	3	3	3	3	3	1	3	1	3	3	3	3	3
BS00022201_51	1A	216.46	1	1	3	1	3	3	3	3	3	3	3	3	3	3	3	1	1	1	3	3	1	3	3	1	3	1	3	3	1	1	1	1	3	3	3	3	3	3	3	1	3	1	3	3	3	3	3
BS00022207_51	1A	216.46	1	1	3	1	3	3	3	3	3	3	3	3	3	3	3	1	1	1	3	3	1	3	3	1	3	1	3	3	1	1	1	1	3	3	3	3	3	3	3	1	3	1	3	3	3	3	3
BS00026917_51	1A	216.46	1	1	1	3	1	1	1	1	1	1	1	1	1	1	1	3	3	3	1	1	3	1	1	3	1	3	1	1	NA	1	1	NA	1	1	1	1	1	1	1	3	1	3	1	1	1	1	1
BS00037007_51	1A	216.46	3	3	3	1	3	3	3	3	3	3	3	3	3	3	3	1	1	1	3	3	1	3	3	1	3	1	3	3	3	3	3	3	3	3	3	3	3	3	3	1	3	1	3	3	3	3	3
BS00037255_51	1A	216.46	1	1	3	1	3	3	3	3	3	3	3	3	3	3	3	1	1	1	3	3	1	3	3	1	3	1	3	3	1	1	1	1	3	3	3	3	3	3	3	1	3	1	3	3	3	3	3
BS00041358_51	1A	216.46	1	1	1	1	3	3	3	3	1	3	3	1	1	3	3	1	1	1	1	1	1	1	1	1	3	1	3	1	1	1	1	1	3	3	3	1	1	1	1	1	1	1	3	1	1	3	3
BS00048887_51	1A	216.46	1	1	3	1	3	3	3	3	3	3	3	3	3	3	3	1	1	1	3	3	1	3	3	1	3	1	3	3	1	1	1	1	3	3	3	3	3	3	3	1	3	1	3	3	3	3	3
BS00062965_51	1A	216.46	1	1	1	3	1	1	1	1	1	1	1	1	1	1	1	3	3	3	1	1	3	1	1	3	1	3	1	1	1	1	1	1	1	1	1	1	1	1	1	3	1	3	1	1	1	1	1
BS00062969_51	1A	216.46	3	3	1	3	1	1	1	1	1	1	1	1	1	1	1	3	3	3	1	1	3	1	1	3	1	3	1	1	3	3	3	3	1	1	1	1	1	1	1	3	1	3	1	1	1	1	1
BS00063063_51	1A	216.46	3	3	1	3	1	1	1	1	1	1	1	1	1	1	1	3	3	3	1	1	3	1	1	3	1	3	1	1	3	3	3	3	1	1	1	1	1	1	1	3	1	3	1	1	1	1	1
BS00064357_51	1A	216.46	3	3	3	1	3	3	3	3	3	3	3	1	3	3	3	1	1	3	3	3	1	3	3	1	3	1	3	3	3	3	3	3	3	3	3	3	3	3	3	1	3	3	3	3	3	3	3
BS00065146_51	1A	216.46	1	1	1	1	3	3	3	3	1	3	3	1	1	3	3	1	1	1	1	1	1	1	1	1	3	1	3	1	1	1	1	1	3	3	3	1	1	1	1	1	1	1	3	1	1	3	3
BS00066549_51	1A	216.46	3	3	1	3	1	1	1	1	1	1	1	1	1	1	1	3	3	3	1	1	3	1	1	3	1	3	1	1	3	3	3	3	1	1	1	1	1	1	1	3	1	3	1	1	1	1	1
BS00067330_51	1A	216.46	3	3	1	3	1	1	1	1	1	1	1	1	1	1	1	3	3	3	1	1	3	1	1	3	1	3	1	1	3	3	3	3	1	1	1	1	1	1	1	3	1	3	1	1	1	1	1
BS00077199_51	1A	216.46	1	1	1	1	3	3	3	3	1	3	3	1	1	3	3	1	1	1	1	1	1	1	1	1	3	1	3	1	1	1	1	1	3	3	3	1	1	1	1	1	1	1	3	1	1	3	3
BS00077504_51	1A	216.46	3	3	1	3	1	1	1	1	1	1	1	1	1	1	1	3	3	3	1	1	3	1	1	3	1	3	1	1	3	3	3	3	1	1	1	1	1	1	1	3	1	3	1	1	1	1	1
BS00077815_51	1A	216.46	3	3	1	3	1	1	1	1	1	1	1	1	1	1	1	3	3	3	1	1	3	1	1	3	1	3	1	1	3	3	3	3	1	1	1	1	1	1	1	3	1	3	1	1	1	1	1
BS00081455_51	1A	216.46	3	3	3	1	3	3	3	3	1	3	3	1	1	3	3	1	1	3	1	1	1	1	1	1	3	1	3	1	3	3	3	3	3	3	3	1	1	1	1	1	1	3	3	1	1	3	3
BS00090408_51	1A	216.46	1	1	1	3	1	1	1	1	1	1	1	3	1	1	1	3	3	1	1	1	3	1	1	3	1	3	1	1	1	1	1	1	1	1	1	1	1	1	1	3	1	1	1	1	1	1	1
BS00092422_51	1A	216.46	3	3	3	1	3	3	3	3	3	3	3	3	3	3	3	1	1	1	3	3	1	3	3	1	3	1	3	3	3	3	3	3	3	3	3	3	3	3	3	1	3	1	3	3	3	3	3
BS00110766_51	1A	216.46	1	1	1	1	3	3	3	3	1	3	3	1	1	3	3	1	1	1	1	1	1	1	1	1	3	1	3	1	1	1	1	1	3	3	3	1	1	1	1	1	1	1	3	1	1	3	3
CAP11_c2984_419	1A	216.46	1	1	3	3	1	1	1	1	1	1	1	1	1	1	1	3	3	3	1	1	3	1	1	3	1	3	1	1	1	1	1	1	1	1	1	1	1	1	1	3	1	3	1	1	1	1	1
CAP11_c6014_160	1A	216.46	3	3	3	1	3	3	3	3	1	3	3	1	3	3	3	1	1	3	1	1	1	1	1	1	3	1	3	1	3	3	3	3	3	3	3	1	1	1	1	1	1	3	3	1	1	3	3
CAP8_c806_297	1A	216.46	3	3	1	3	1	1	1	1	1	1	1	1	1	1	1	3	3	3	1	1	3	1	1	3	1	3	1	1	3	3	3	3	1	1	1	1	1	1	1	3	1	3	1	1	1	1	1
CAP8_rep_c7560_159	1A	216.46	1	1	3	1	3	3	3	3	1	3	3	1	3	3	3	1	1	1	1	1	1	1	1	1	3	1	3	1	1	1	1	1	3	3	3	1	1	1	1	1	1	3	3	1	1	3	3
Ex_c14515_218	1A	216.46	3	3	1	3	1	1	1	1	1	1	1	1	1	1	1	3	3	3	1	1	3	1	1	3	1	3	1	1	3	3	3	3	1	1	1	1	1	1	1	3	1	3	1	1	1	1	1
Ex_c14515_220	1A	216.46	1	1	3	1	3	3	3	3	3	3	3	3	3	3	3	1	1	1	3	3	1	3	3	1	3	1	3	3	1	1	1	1	3	3	3	3	3	3	3	1	3	1	3	3	3	3	3
Ex_c2389_1634	1A	216.46	3	3	3	1	3	3	3	3	3	3	3	3	3	3	3	1	1	1	3	3	1	3	3	1	3	1	3	3	3	3	3	3	3	3	3	3	3	3	3	1	3	1	3	3	3	3	3
Ex_c3567_1048	1A	216.46	1	1	3	1	3	3	3	3	3	3	3	3	3	3	3	1	1	1	3	3	1	3	3	1	3	1	3	3	1	1	1	NA	3	3	3	3	3	3	3	1	3	1	3	3	3	3	3
Ex_c3799_2429	1A	216.46	3	3	1	3	1	1	1	1	1	1	1	1	1	1	1	3	3	3	1	1	3	1	1	3	1	3	1	1	3	3	3	3	1	1	1	1	1	1	1	3	1	3	1	1	1	1	1
Ex_c6765_2118	1A	216.46	1	1	1	3	1	1	1	1	3	1	1	3	1	1	1	3	3	1	3	3	3	3	3	3	1	3	1	3	1	1	1	1	1	1	1	3	3	3	3	3	3	1	1	3	3	1	1
Excalibur_c11374_1126	1A	216.46	1	1	1	3	1	1	1	1	1	1	1	1	1	1	1	3	3	3	1	1	3	1	1	3	1	3	1	1	1	1	1	1	1	1	1	1	1	1	1	3	1	3	1	1	1	1	1
Excalibur_c17872_137	1A	216.46	1	1	3	1	3	3	3	3	1	3	3	1	3	3	3	1	1	1	1	1	1	1	1	1	3	1	3	1	1	1	1	1	3	3	3	1	1	1	1	1	1	3	3	1	1	3	3
Excalibur_c20133_87	1A	216.46	1	1	3	1	3	3	3	3	3	3	3	3	3	3	3	1	1	1	3	3	1	3	3	1	3	1	3	3	1	1	1	1	3	3	3	3	3	3	3	1	3	1	3	3	3	3	3
Excalibur_c22728_610	1A	216.46	1	1	1	3	1	1	1	1	1	1	1	3	1	1	1	3	3	1	1	1	3	1	1	3	1	3	1	1	1	1	1	1	1	1	1	1	1	1	1	3	1	1	1	1	1	1	1
Excalibur_c2389_90	1A	216.46	3	3	3	1	3	3	3	3	3	3	3	3	3	3	3	1	1	1	3	3	1	3	3	1	3	1	3	3	3	3	3	3	3	3	3	3	3	3	3	1	3	1	3	3	3	3	3
Excalibur_c44731_1000	1A	216.46	1	1	1	1	1	1	1	1	1	1	1	1	1	1	1	3	1	3	1	1	3	1	1	1	1	1	1	1	1	1	1	1	1	1	1	1	1	1	1	1	1	1	1	1	1	1	1
Excalibur_c49588_76	1A	216.46	1	1	3	1	3	3	3	3	1	3	3	1	3	3	3	1	1	1	1	1	1	1	1	1	3	1	3	1	1	1	1	1	3	3	3	1	1	1	1	1	1	3	3	1	1	3	3
Excalibur_c57766_92	1A	216.46	3	3	1	3	1	1	1	1	1	1	1	1	1	1	1	3	3	3	1	1	3	1	1	3	1	3	1	1	3	3	3	3	1	1	1	1	1	1	1	3	1	3	1	1	1	1	1
Excalibur_c6141_1337	1A	216.46	1	1	3	1	3	3	3	3	3	3	3	3	3	3	3	1	1	1	3	3	1	3	3	1	3	1	3	3	1	1	1	1	3	3	3	3	3	3	3	1	3	1	3	3	3	3	3
Excalibur_c6255_1119	1A	216.46	3	3	3	3	3	3	3	3	3	3	3	3	3	3	3	3	3	3	3	3	3	3	3	3	3	3	3	3	3	3	3	3	3	3	3	3	3	3	3	3	3	3	3	3	3	3	3
Excalibur_c7692_139	1A	216.46	3	3	1	3	1	1	1	1	1	1	1	1	1	1	1	3	3	3	1	1	3	1	1	3	1	3	1	1	3	3	3	3	1	1	1	1	1	1	1	3	1	3	1	1	1	1	1
Excalibur_rep_c106065_511	1A	216.46	3	3	1	3	1	1	1	1	1	1	1	1	1	NA	1	3	3	3	1	1	3	1	1	3	1	3	1	1	3	3	3	3	1	1	1	1	1	1	1	3	1	3	1	1	1	1	1
Excalibur_rep_c107489_168	1A	216.46	1	1	3	1	3	3	3	3	1	3	3	NA	3	3	3	1	1	1	1	1	1	1	1	1	3	1	3	1	1	1	1	1	3	3	3	1	1	1	1	1	1	3	3	1	1	3	3
Excalibur_rep_c113303_500	1A	216.46	1	1	1	1	3	3	3	3	1	3	3	1	1	3	3	1	1	1	1	1	1	1	1	1	3	1	3	1	1	1	1	1	3	3	3	1	1	1	1	1	1	1	3	1	1	3	3
Excalibur_rep_c88290_94	1A	216.46	3	3	1	3	1	1	1	1	1	1	1	1	1	1	1	3	3	3	1	1	3	1	1	3	1	3	1	1	3	3	3	3	1	1	1	1	1	1	1	3	1	3	1	1	1	1	1
Excalibur_s107771_77	1A	216.46	3	3	1	3	1	1	1	1	1	1	1	1	1	1	1	3	3	3	1	1	3	1	1	3	1	3	1	1	3	3	3	3	1	1	1	1	1	1	1	3	1	3	1	1	1	1	1
GENE.0041_182	1A	216.46	3	3	1	3	1	1	1	1	1	1	1	1	1	1	1	3	3	3	1	1	3	1	1	3	1	3	1	1	3	3	3	3	1	1	1	1	1	1	1	3	1	3	1	1	1	1	1
GENE.0287_28	1A	216.46	3	3	1	3	1	1	1	1	1	1	1	1	1	1	1	3	3	3	1	1	3	1	1	3	1	3	1	1	3	3	3	3	1	1	1	1	1	1	1	3	1	3	1	1	1	1	1
GENE.0379_108	1A	216.46	3	3	1	3	1	1	1	1	1	1	1	1	1	1	1	3	3	3	1	1	3	1	1	3	1	3	1	1	3	3	3	3	1	1	1	1	1	1	1	3	1	3	1	1	1	1	1
GENE.0431_601	1A	216.46	3	3	1	3	3	3	3	3	1	1	3	1	3	1	3	3	3	3	1	1	3	1	1	3	3	3	1	1	3	3	3	3	1	3	3	1	1	1	1	3	1	3	3	1	1	3	3
GENE.0446_243	1A	216.46	3	3	3	3	1	1	1	1	3	1	1	3	3	1	1	3	3	3	3	3	3	3	3	3	1	3	1	3	3	3	3	3	1	1	1	3	3	3	3	3	3	3	1	3	3	1	1
GENE.0561_101	1A	216.46	1	1	1	3	1	1	1	1	1	1	1	1	1	1	1	3	3	3	1	1	3	1	1	3	1	3	1	1	1	1	1	1	1	1	1	1	1	1	1	3	1	3	1	1	1	1	1
GENE.0561_311	1A	216.46	1	1	3	1	3	3	3	3	3	3	3	3	3	3	3	1	1	1	3	3	1	3	3	1	3	1	3	3	1	1	1	1	3	3	3	3	3	3	3	1	3	1	3	3	3	3	3
GENE.2795_120	1A	216.46	1	1	3	1	3	3	3	3	3	3	3	3	3	3	3	1	1	1	3	3	1	3	3	1	3	1	3	3	1	1	1	1	3	3	3	3	3	3	3	1	3	1	3	3	3	3	3
IAAV1851	1A	216.46	1	1	3	1	3	3	3	3	3	3	3	3	3	3	3	1	1	1	3	3	1	3	3	1	3	1	3	3	1	1	1	1	3	3	3	3	3	3	3	1	3	1	3	3	3	3	3
IAAV2342	1A	216.46	1	1	1	3	1	1	1	1	1	1	1	1	1	1	1	3	3	3	1	1	3	1	1	3	1	3	1	1	1	1	1	1	1	1	1	1	1	1	1	3	1	3	1	1	1	1	1
IAAV3306	1A	216.46	3	3	1	3	3	3	3	3	3	3	3	3	3	3	3	3	3	3	3	3	3	3	3	3	3	3	3	3	3	3	3	3	3	3	3	3	3	3	3	3	3	3	3	3	3	3	3
IAAV3846	1A	216.46	1	1	3	1	3	3	3	3	3	3	3	3	3	3	3	1	1	1	3	3	1	3	3	1	3	1	3	3	1	1	1	1	3	3	3	3	3	3	3	1	3	1	3	3	3	3	3
IAAV5581	1A	216.46	3	3	3	1	3	3	3	3	3	3	3	3	3	3	3	1	1	1	3	3	1	3	3	1	3	1	3	3	3	3	3	3	3	3	3	3	3	3	3	1	3	1	3	3	3	3	3
IAAV5756	1A	216.46	1	1	1	3	1	1	1	1	1	1	1	1	1	1	1	3	3	3	1	1	3	1	1	3	1	3	1	1	1	1	1	1	1	1	1	1	1	1	1	3	1	3	1	1	1	1	1
IAAV7414	1A	216.46	3	3	1	1	3	3	3	3	3	3	3	3	3	3	3	1	1	1	3	3	1	3	3	1	3	1	3	3	3	3	3	3	3	3	3	3	3	3	3	1	3	1	3	3	3	3	3
IAAV742	1A	216.46	3	3	1	3	1	1	1	1	1	1	1	1	1	1	1	3	3	3	1	1	3	1	1	3	1	3	1	1	3	3	3	3	1	1	1	1	1	1	1	3	1	3	1	1	1	1	1
IAAV7551	1A	216.46	1	1	1	3	1	1	1	1	3	1	1	NA	3	1	1	3	3	1	3	3	3	3	3	3	1	3	1	3	1	1	1	1	1	1	1	3	3	3	3	3	3	1	1	3	3	1	1
IAAV7929	1A	216.46	1	1	1	1	3	3	3	3	1	3	3	1	1	3	3	1	1	1	1	1	1	1	1	1	3	1	3	1	1	1	1	1	3	3	3	1	1	1	1	1	1	1	3	1	1	3	3
IAAV814	1A	216.46	1	1	3	1	1	1	1	1	1	1	1	1	1	1	1	3	1	3	1	1	3	1	1	1	1	1	1	1	1	1	1	1	1	1	1	1	1	1	1	1	1	1	1	1	1	1	1
IAAV8664	1A	216.46	1	1	3	1	3	3	3	3	3	3	3	3	3	3	3	1	1	1	3	3	1	3	3	1	3	1	3	3	1	1	1	1	3	3	3	3	3	3	3	1	3	1	3	3	3	3	3
IAAV8824	1A	216.46	3	3	1	3	1	1	1	1	1	1	1	1	1	1	1	3	3	3	1	1	3	1	1	3	1	3	1	1	3	3	3	3	1	1	1	1	1	1	1	3	1	3	1	1	1	1	1
IAAV9022	1A	216.46	1	1	3	1	3	3	3	3	3	3	3	3	3	3	3	1	1	1	3	3	1	3	3	1	3	1	3	3	1	1	1	1	3	3	3	3	3	3	3	1	3	1	3	3	3	3	3
IACX7767	1A	216.46	1	1	3	1	3	3	3	3	3	3	3	3	3	3	3	1	1	1	3	3	1	3	3	1	3	1	3	3	1	1	1	1	3	3	3	3	3	3	3	1	3	1	3	3	3	3	3
IACX7921	1A	216.46	3	3	1	3	1	1	1	1	1	1	1	1	1	1	1	3	3	3	1	1	3	1	1	3	1	3	1	1	3	3	3	3	1	1	1	1	1	1	1	3	1	3	1	1	1	1	1
Ku_c2449_578	1A	216.46	1	1	1	3	1	1	1	1	1	1	1	1	1	1	1	3	3	3	1	1	3	1	1	3	1	3	1	1	1	1	1	1	1	1	1	1	1	1	1	3	1	3	1	1	1	1	1
Ku_c2742_638	1A	216.46	1	1	3	1	3	3	3	3	3	3	3	3	3	3	3	1	1	1	3	3	1	3	3	1	3	1	3	3	1	1	1	1	3	3	3	3	3	3	3	1	3	1	3	3	3	3	3
Ku_c2898_1247	1A	216.46	3	3	3	1	3	3	3	3	3	3	3	3	3	3	3	1	1	1	3	3	1	3	3	1	3	1	3	3	3	3	3	3	3	3	3	3	3	3	3	1	3	1	3	3	3	3	3
Ku_c2898_1284	1A	216.46	1	1	1	3	1	1	1	1	1	1	1	1	1	1	1	3	3	3	1	1	3	1	1	3	1	3	1	1	1	1	1	1	1	1	1	1	1	1	1	3	1	3	1	1	1	1	1
Ku_c2898_221	1A	216.46	3	3	3	1	3	3	3	3	3	3	3	3	3	3	3	1	1	1	3	3	1	3	3	1	3	1	3	3	3	3	3	3	3	3	3	3	3	3	3	1	3	1	3	3	3	3	3
Kukri_c23382_1431	1A	216.46	3	3	1	3	1	1	1	1	1	1	1	1	1	1	1	3	3	3	1	1	3	1	1	3	1	3	1	1	3	3	3	3	1	1	1	1	1	1	1	3	1	3	1	1	1	1	1
Kukri_c24897_140	1A	216.46	1	1	3	1	1	1	1	1	1	1	1	1	1	1	1	3	1	NA	1	1	3	1	1	1	1	1	1	1	1	1	1	1	1	1	1	1	1	1	1	1	1	1	1	1	1	1	1
Kukri_c25839_487	1A	216.46	1	1	1	3	1	1	1	1	1	1	1	3	1	1	1	3	3	1	1	1	3	1	1	3	1	3	1	1	1	1	1	1	1	1	1	1	1	1	1	3	1	1	1	1	1	1	1
Kukri_c26669_515	1A	216.46	3	3	1	3	1	1	1	1	1	1	1	1	1	1	1	3	3	3	1	1	3	1	1	3	1	3	1	1	3	3	3	3	1	1	1	1	1	1	1	3	1	3	1	1	1	1	1
Kukri_c31093_387	1A	216.46	3	3	1	3	1	1	1	1	1	1	1	1	1	1	1	3	3	3	1	1	3	1	1	3	1	3	1	1	3	3	3	3	1	1	1	1	1	1	1	3	1	3	1	1	1	1	1
Kukri_c33586_75	1A	216.46	1	1	1	1	1	1	1	1	3	3	1	1	1	1	1	1	1	3	1	1	1	1	1	1	1	1	1	1	1	1	1	1	3	1	1	1	1	1	1	1	1	1	3	1	1	1	1
Kukri_c362_151	1A	216.46	3	3	1	3	1	1	1	1	1	1	1	1	1	1	1	3	3	3	1	1	3	1	1	3	1	3	1	1	3	3	3	3	1	1	1	1	1	1	1	3	1	3	1	1	1	1	1
Kukri_c362_91	1A	216.46	1	1	3	1	3	3	3	3	3	3	3	3	3	3	3	1	1	1	3	3	1	3	3	1	3	1	3	3	1	1	1	1	3	3	3	3	3	3	3	1	3	1	3	3	3	3	3
Kukri_c4099_321	1A	216.46	3	3	3	1	1	1	1	1	1	1	1	1	1	1	1	3	1	3	1	1	3	1	1	1	1	1	1	1	3	3	3	3	1	1	1	1	1	1	1	1	1	1	1	1	1	1	1
Kukri_c43730_841	1A	216.46	3	3	3	1	3	3	3	3	1	3	3	1	3	3	3	1	1	3	1	1	1	1	1	1	3	1	3	1	3	3	3	3	3	3	3	1	1	1	1	1	1	3	3	1	1	3	3
Kukri_c54467_100	1A	216.46	3	3	1	3	3	3	3	3	1	3	3	3	3	3	3	1	3	3	1	1	1	1	1	3	3	3	3	1	3	3	3	3	3	3	3	1	1	1	1	3	1	1	3	1	1	3	3
Kukri_rep_c101218_200	1A	216.46	3	3	1	3	1	1	1	1	1	1	1	1	1	NA	1	3	3	3	1	1	3	1	1	3	1	3	1	1	3	3	3	3	1	1	1	1	1	1	1	3	1	3	1	1	1	1	1
Kukri_rep_c104386_273	1A	216.46	1	1	1	3	1	1	3	3	1	1	1	1	1	NA	1	1	3	1	1	1	1	1	3	3	3	3	3	1	1	1	1	1	3	3	1	3	3	3	3	3	1	3	1	1	3	1	3
Kukri_rep_c81206_235	1A	216.46	3	3	1	3	1	1	1	1	1	1	1	1	1	NA	1	3	3	3	1	1	3	1	1	3	1	3	1	1	3	3	3	3	1	1	1	1	1	1	1	3	1	3	1	1	1	1	1
Kukri_rep_c99813_69	1A	216.46	1	1	3	1	3	3	3	3	3	3	3	3	3	3	3	1	1	1	3	3	1	3	3	1	3	1	3	3	1	1	1	1	3	3	3	3	3	3	3	1	3	1	3	3	3	3	3
Ra_c11042_1500	1A	216.46	1	1	3	1	3	3	3	3	3	3	3	3	3	3	3	1	1	1	3	3	1	3	3	1	3	1	3	3	1	1	1	1	3	3	3	3	3	3	3	1	3	1	3	3	3	3	3
Ra_c16532_425	1A	216.46	3	3	3	1	3	3	3	3	3	3	3	3	3	3	3	1	1	1	3	3	1	3	3	1	3	1	3	3	3	3	3	3	3	3	3	3	3	3	3	1	3	1	3	3	3	3	3
Ra_c4140_287	1A	216.46	1	1	1	3	3	3	3	3	3	3	3	NA	3	3	3	1	3	1	3	3	1	3	3	3	3	3	3	3	1	1	1	1	3	3	3	3	3	3	3	3	3	3	3	3	3	3	3
Ra_c56967_900	1A	216.46	3	3	3	3	1	3	3	3	3	3	1	3	1	3	1	3	3	3	3	3	3	3	3	3	3	3	3	3	3	3	3	3	3	3	1	3	3	3	3	3	3	3	1	3	3	1	3
Ra_c7062_430	1A	216.46	3	3	1	3	1	1	1	1	1	1	1	1	1	1	1	3	3	3	1	1	3	1	1	3	1	3	1	1	3	3	3	3	1	1	1	1	1	1	1	3	1	3	1	1	1	1	1
RAC875_c10400_791	1A	216.46	1	1	1	1	3	3	3	3	1	3	3	1	1	3	3	1	1	1	1	1	1	1	1	1	3	1	3	1	1	1	1	1	3	3	3	1	1	1	1	1	1	1	3	1	1	3	3
RAC875_c10506_434	1A	216.46	1	1	1	3	1	1	1	1	1	1	1	3	1	1	1	3	3	1	1	1	3	1	1	3	1	3	1	1	1	1	1	1	1	1	1	1	1	1	1	3	1	1	1	1	1	1	1
RAC875_c11899_366	1A	216.46	3	3	3	3	3	3	3	3	1	1	3	3	3	3	3	3	3	3	1	3	3	1	1	3	3	3	3	1	3	3	3	3	3	3	3	1	3	3	1	3	1	3	3	1	1	3	3
RAC875_c12808_182	1A	216.46	1	1	1	1	3	3	3	3	1	3	3	1	1	3	3	1	1	1	1	1	1	1	1	1	3	1	3	1	1	1	1	1	3	3	3	1	1	1	1	1	1	1	3	1	1	3	3
RAC875_c15998_53	1A	216.46	3	3	1	3	1	1	1	1	3	1	1	3	1	1	1	3	3	3	3	3	3	3	3	3	1	3	1	3	3	3	3	3	1	1	1	3	3	3	3	3	3	1	1	3	3	1	1
RAC875_c18355_804	1A	216.46	3	3	1	3	1	1	1	1	1	1	1	1	1	1	1	3	3	3	1	1	3	1	1	3	1	3	1	1	3	3	3	3	1	1	1	1	1	1	1	3	1	3	1	1	1	1	1
RAC875_c2021_1417	1A	216.46	1	1	3	1	3	3	3	3	3	3	3	3	3	3	3	1	1	1	3	3	1	3	3	1	3	1	3	3	1	1	1	1	3	3	3	3	3	3	3	1	3	1	3	3	3	3	3
RAC875_c2202_1097	1A	216.46	3	3	3	1	3	3	3	3	3	3	3	3	3	3	3	1	1	1	3	3	1	3	3	1	3	1	3	3	3	3	3	3	3	3	3	3	3	3	3	1	3	1	3	3	3	3	3
RAC875_c2313_410	1A	216.46	1	1	3	1	3	3	3	3	3	3	3	3	3	3	3	1	1	1	3	3	1	3	3	1	3	1	3	3	1	1	1	1	3	3	3	3	3	3	3	1	3	1	3	3	3	3	3
RAC875_c24560_604	1A	216.46	3	3	3	3	1	1	1	1	3	1	1	3	3	1	1	3	3	3	3	3	3	3	3	3	1	3	1	3	3	3	3	3	1	1	1	3	3	3	3	3	3	3	1	3	3	1	1
RAC875_c25442_231	1A	216.46	3	3	1	3	1	1	1	1	1	1	1	1	1	1	1	3	3	3	1	1	3	1	1	3	1	3	1	1	3	3	3	3	1	1	1	1	1	1	1	3	1	3	1	1	1	1	1
RAC875_c37025_2027	1A	216.46	NA	1	1	3	1	1	1	1	1	1	1	1	1	1	1	3	3	3	1	1	3	1	1	3	1	3	1	1	1	1	1	1	1	1	1	1	1	1	1	3	1	3	1	1	1	1	1
RAC875_c3751_96	1A	216.46	3	3	3	1	3	3	3	3	1	3	3	1	1	3	3	1	1	3	1	1	1	1	1	1	3	1	3	1	3	3	3	3	3	3	3	1	1	1	1	1	1	3	3	1	1	3	3
RAC875_c38417_246	1A	216.46	3	3	1	3	1	1	1	1	3	1	1	3	1	1	1	3	3	3	3	3	3	3	3	3	1	3	1	3	3	3	3	3	1	1	1	3	3	3	3	3	3	1	1	3	3	1	1
RAC875_c39125_365	1A	216.46	3	3	3	1	3	3	3	3	1	3	3	1	3	3	3	1	1	3	1	1	1	1	1	1	3	1	3	1	3	3	3	3	3	3	3	1	1	1	1	1	1	3	3	1	1	3	3
RAC875_c40579_501	1A	216.46	3	3	1	3	1	1	1	1	1	1	1	1	1	1	1	3	3	3	1	1	3	1	1	3	1	3	1	1	3	3	3	3	1	1	1	1	1	1	1	3	1	3	1	1	1	1	1
RAC875_c55052_604	1A	216.46	1	1	3	1	3	3	3	3	1	3	3	1	3	3	3	1	1	1	1	1	1	1	1	1	3	1	3	1	1	1	1	1	3	3	3	1	1	1	1	1	1	3	3	1	1	3	3
RAC875_c5544_4156	1A	216.46	1	1	1	3	1	1	3	3	1	1	1	1	1	3	1	1	3	1	1	1	1	1	3	3	3	3	3	1	1	1	1	1	3	3	1	3	3	3	3	3	1	3	1	1	3	1	3
RAC875_c6338_1887	1A	216.46	1	1	1	3	1	1	1	1	1	1	1	3	1	1	1	3	3	1	1	1	3	1	1	3	1	3	1	1	1	1	1	1	1	1	1	1	1	1	1	3	1	1	1	1	1	1	1
RAC875_c6338_2719	1A	216.46	1	1	1	3	1	1	1	1	1	1	1	3	1	1	1	3	3	1	1	1	3	1	1	3	1	3	1	1	1	1	1	1	1	1	1	1	1	1	1	3	1	1	1	1	1	1	1
RAC875_c7305_75	1A	216.46	3	3	1	3	1	1	1	1	1	1	1	NA	1	1	1	3	3	3	1	1	3	1	1	3	1	3	1	1	3	3	3	3	1	1	1	1	1	1	1	3	1	3	1	1	1	1	1
RAC875_c7847_1352	1A	216.46	1	1	1	3	1	1	1	1	1	1	1	1	1	1	1	3	3	3	1	1	3	1	1	3	1	3	1	1	1	1	1	1	1	1	1	1	1	1	1	3	1	3	1	1	1	1	1
RAC875_c8515_653	1A	216.46	1	1	3	1	3	3	3	3	1	3	3	1	3	3	3	1	1	1	1	1	1	1	1	1	3	1	3	1	1	1	1	1	3	3	3	1	1	1	1	1	1	3	3	1	1	3	3
RAC875_c85778_184	1A	216.46	1	1	3	1	3	3	3	3	3	3	3	3	3	3	3	1	1	1	3	3	1	3	3	1	3	1	3	3	1	1	1	1	3	3	3	3	3	3	3	1	3	1	3	3	3	3	3
RAC875_c9965_354	1A	216.46	1	1	3	3	1	1	1	1	1	1	1	1	1	1	1	3	3	3	1	1	3	1	1	3	1	3	1	1	1	1	1	1	1	1	1	1	1	1	1	3	1	3	1	1	1	1	1
RAC875_rep_c70404_755	1A	216.46	3	3	1	3	1	1	1	1	1	1	1	1	1	1	1	3	3	3	1	1	3	1	1	3	1	3	1	1	3	3	3	3	1	1	1	1	1	1	1	3	1	3	1	1	1	1	1
RAC875_rep_c72774_131	1A	216.46	3	3	3	1	3	3	3	3	3	3	3	3	3	3	3	1	1	1	3	3	1	3	3	1	3	1	3	3	3	3	3	3	3	3	3	3	3	3	3	1	3	1	3	3	3	3	3
TA001772.0625	1A	216.46	1	1	1	1	3	3	3	3	1	3	3	1	1	3	3	1	1	1	1	1	1	1	1	1	3	1	3	1	1	1	1	1	3	3	3	1	1	1	1	1	1	1	3	1	1	3	3
TA003382.0407	1A	216.46	1	1	3	1	3	3	3	3	3	3	3	3	3	3	3	1	1	1	3	3	1	3	3	1	3	1	3	3	1	1	1	1	3	3	3	3	3	3	3	1	3	1	3	3	3	3	3
TA003542.0511	1A	216.46	1	1	1	3	1	1	1	1	1	1	1	3	1	1	1	3	3	1	1	1	3	1	1	3	1	3	1	1	1	1	1	1	1	1	1	1	1	1	1	3	1	1	1	1	1	1	1
TA004365.0417	1A	216.46	3	3	1	3	1	1	1	1	1	1	1	1	1	1	1	3	3	3	1	1	3	1	1	3	1	3	1	1	3	3	3	3	1	1	1	1	1	1	1	3	1	3	1	1	1	1	1
TA013367.0455	1A	216.46	1	1	3	1	3	3	3	3	1	3	3	NA	3	3	3	1	1	1	1	1	1	1	1	1	3	1	3	1	1	1	1	1	3	3	3	1	1	1	1	1	1	3	3	1	1	3	3
TA016013.1040	1A	216.46	1	1	1	1	3	3	3	3	1	3	3	1	1	3	3	1	1	1	1	1	1	1	1	1	3	1	3	1	1	1	1	1	3	3	3	1	1	1	1	1	1	1	3	1	1	3	3
Tdurum_contig15970_607	1A	216.46	3	3	3	3	3	3	3	3	3	3	3	3	3	3	3	1	3	3	3	3	1	3	3	3	3	3	3	3	3	3	3	3	3	3	3	3	3	3	3	3	3	3	3	3	3	3	3
Tdurum_contig20581_256	1A	216.46	1	1	3	1	3	3	3	3	3	3	3	3	3	3	3	1	1	1	3	3	1	3	3	1	3	1	3	3	1	1	1	1	3	3	3	3	3	3	3	1	3	1	3	3	3	3	3
Tdurum_contig27840_865	1A	216.46	1	1	1	3	1	1	1	1	1	1	1	1	1	1	1	3	3	3	1	1	3	1	1	3	1	3	1	1	1	1	1	1	1	1	1	1	1	1	1	3	1	3	1	1	1	1	1
Tdurum_contig45671_799	1A	216.46	3	3	3	3	3	3	3	3	3	3	3	3	3	3	3	1	3	3	3	3	1	3	3	3	3	3	3	3	3	3	3	3	3	3	3	3	3	3	3	3	3	3	3	3	3	3	3
tplb0032d09_1393	1A	216.46	1	1	3	3	1	1	1	1	1	1	1	1	1	1	1	3	3	3	1	1	3	1	1	3	1	3	1	1	1	1	1	1	1	1	1	1	1	1	1	3	1	3	1	1	1	1	1
wsnp_BE585780A_Ta_2_2	1A	216.46	3	3	3	3	3	3	3	3	3	3	3	3	3	3	3	1	3	3	3	3	1	3	3	3	3	3	3	3	3	3	3	3	3	3	3	3	3	3	3	3	3	3	3	3	3	3	3
wsnp_BE605063A_Ta_2_2	1A	216.46	1	1	1	1	1	1	1	1	1	1	1	1	1	1	1	3	1	1	1	1	3	1	1	1	1	1	1	1	1	1	1	1	1	1	1	1	1	1	1	1	1	1	1	1	1	1	1
wsnp_BE605063A_Ta_2_3	1A	216.46	3	3	3	3	3	3	3	3	3	3	3	3	3	3	3	1	3	3	3	3	1	3	3	3	3	3	3	3	3	3	3	3	3	3	3	3	3	3	3	3	3	3	3	3	3	3	3
wsnp_CAP11_c1029_611774	1A	216.46	3	3	1	3	1	1	1	1	1	1	1	1	1	1	1	3	3	3	1	1	3	1	1	3	1	3	1	1	3	3	3	3	1	1	1	1	1	1	1	3	1	3	1	1	1	1	1
wsnp_CAP12_c2645_1267978	1A	216.46	1	1	3	1	3	3	3	3	3	3	3	3	3	3	3	1	1	1	3	3	1	3	3	1	3	1	3	3	1	1	1	1	3	3	3	3	3	3	3	1	3	1	3	3	3	3	3
wsnp_Ex_c111741_93530669	1A	216.46	1	1	3	1	1	1	1	1	1	1	1	1	1	1	1	3	1	3	1	1	3	1	1	1	1	1	1	1	1	1	1	1	1	1	1	1	1	1	1	1	1	1	1	1	1	1	1
wsnp_Ex_c12117_19381493	1A	216.46	3	3	3	3	1	3	3	3	3	3	1	3	1	3	1	3	3	3	3	3	3	3	3	3	3	3	3	3	3	3	3	3	3	3	1	3	3	3	3	3	3	3	1	3	3	1	3
wsnp_Ex_c14733_22819350	1A	216.46	3	3	1	1	3	3	3	3	3	3	3	3	3	3	3	1	1	1	3	3	1	3	3	1	3	1	3	3	3	3	3	3	3	3	3	3	3	3	3	1	3	1	3	3	3	3	3
wsnp_Ex_c14733_22819625	1A	216.46	3	3	3	3	1	1	1	1	1	1	1	1	1	1	1	3	3	3	1	1	3	1	1	3	1	3	1	1	3	3	3	3	1	1	1	1	1	1	1	3	1	3	1	1	1	1	1
wsnp_Ex_c17684_26426785	1A	216.46	3	3	3	1	3	3	3	3	3	3	3	3	3	3	3	1	1	1	3	3	1	3	3	1	3	1	3	3	3	3	3	3	3	3	3	3	3	3	3	1	3	1	3	3	3	3	3
wsnp_Ex_c18196_27006489	1A	216.46	1	1	3	1	3	3	3	3	3	3	3	3	3	3	3	1	1	1	3	3	1	3	3	1	3	1	3	3	1	1	1	1	3	3	3	3	3	3	3	1	3	1	3	3	3	3	3
wsnp_Ex_c21450_30588044	1A	216.46	3	3	1	3	1	1	1	1	1	1	1	1	1	1	1	3	3	3	1	1	3	1	1	3	1	3	1	1	3	3	3	3	1	1	1	1	1	1	1	3	1	3	1	1	1	1	1
wsnp_Ex_c2389_4477621	1A	216.46	3	3	1	3	1	1	1	1	1	1	1	1	1	1	1	3	3	3	1	1	3	1	1	3	1	3	1	1	3	3	3	3	1	1	1	1	1	1	1	3	1	3	1	1	1	1	1
wsnp_Ex_c2389_4477880	1A	216.46	1	1	1	3	1	1	1	1	1	1	1	1	1	1	1	3	3	3	1	1	3	1	1	3	1	3	1	1	1	1	1	1	1	1	1	1	1	1	1	3	1	3	1	1	1	1	1
wsnp_Ex_c2389_4478587	1A	216.46	3	3	3	1	3	3	3	3	3	3	3	3	3	3	3	1	1	1	3	3	1	3	3	1	3	1	3	3	3	3	3	3	3	3	3	3	3	3	3	1	3	1	3	3	3	3	3
wsnp_Ex_c2389_4479047	1A	216.46	3	3	1	3	1	1	1	1	1	1	1	1	1	1	1	3	3	3	1	1	3	1	1	3	1	3	1	1	3	3	3	3	1	1	1	1	1	1	1	3	1	3	1	1	1	1	1
wsnp_Ex_c25220_34487119	1A	216.46	3	3	3	1	3	3	3	3	3	3	3	3	3	3	3	1	1	1	3	3	1	3	3	1	3	1	3	3	3	3	3	3	3	3	3	3	3	3	3	1	3	1	3	3	3	3	3
wsnp_Ex_c25628_34888253	1A	216.46	1	1	1	1	3	3	3	3	1	3	3	1	1	3	3	1	1	1	1	1	1	1	1	1	3	1	3	1	1	1	1	1	3	3	3	1	1	1	1	1	1	1	3	1	1	3	3
wsnp_Ex_c2749_5091813	1A	216.46	3	3	3	3	1	1	1	1	1	1	1	1	1	1	1	3	3	3	1	1	3	1	1	3	1	3	1	1	3	3	3	3	1	1	1	1	1	1	1	3	1	3	1	1	1	1	1
wsnp_Ex_c28165_37310070	1A	216.46	1	1	1	3	1	1	1	1	1	1	1	NA	1	1	1	3	3	3	1	1	3	1	1	3	1	3	1	1	1	1	1	1	1	1	1	1	1	1	1	3	1	3	1	1	1	1	1
wsnp_Ex_c2972_5477975	1A	216.46	1	1	3	1	3	3	3	3	3	3	3	3	3	3	3	1	1	1	3	3	1	3	3	1	3	1	3	3	1	1	1	1	3	3	3	3	3	3	3	1	3	1	3	3	3	3	3
wsnp_Ex_c3142_5808220	1A	216.46	1	1	3	1	3	3	3	3	3	3	3	3	3	3	3	1	1	1	3	3	1	3	3	1	3	1	3	3	1	1	1	1	3	3	3	3	3	3	3	1	3	1	3	3	3	3	3
wsnp_Ex_c3142_5808330	1A	216.46	1	1	3	1	3	3	3	3	3	3	3	3	3	3	3	1	1	1	3	3	1	3	3	1	3	1	3	3	1	1	1	1	3	3	3	3	3	3	3	1	3	1	3	3	3	3	3
wsnp_Ex_c3142_5808713	1A	216.46	1	1	3	1	3	3	3	3	3	3	3	3	3	3	3	1	1	1	3	3	1	3	3	1	3	1	3	3	1	1	1	1	3	3	3	3	3	3	3	1	3	1	3	3	3	3	3
wsnp_Ex_c31525_40302140	1A	216.46	1	1	3	1	1	1	1	1	1	1	1	1	1	1	1	3	1	3	1	1	3	1	1	1	1	1	1	1	1	1	1	1	1	1	1	1	1	1	1	1	1	1	1	1	1	1	1
wsnp_Ex_c31525_40302747	1A	216.46	1	1	1	3	3	3	3	3	3	3	3	3	3	3	3	1	3	1	3	3	1	3	3	3	3	3	3	3	1	1	1	1	3	3	3	3	3	3	3	3	3	3	3	3	3	3	3
wsnp_Ex_c3365_6183009	1A	216.46	1	1	3	1	3	3	3	3	3	3	3	3	3	3	3	1	1	1	3	3	1	3	3	1	3	1	3	3	1	1	1	1	3	3	3	3	3	3	3	1	3	1	3	3	3	3	3
wsnp_Ex_c33831_42253707	1A	216.46	3	3	1	3	1	1	1	1	3	1	1	3	1	1	1	3	3	3	3	3	3	3	3	3	1	3	1	3	3	3	3	3	1	1	1	3	3	3	3	3	3	1	1	3	3	1	1
wsnp_Ex_c3572_6533892	1A	216.46	3	3	3	1	3	3	3	3	1	3	3	1	3	3	3	1	1	3	1	1	1	1	1	1	3	1	3	1	3	3	3	3	3	3	3	1	1	1	1	1	1	3	3	1	1	3	3
wsnp_Ex_c3747_6824863	1A	216.46	1	1	3	1	3	3	3	3	3	3	3	3	3	3	3	1	1	1	3	3	1	3	3	1	3	1	3	3	1	1	1	1	3	3	3	3	3	3	3	1	3	1	3	3	3	3	3
wsnp_Ex_c40942_47886087	1A	216.46	1	1	1	3	1	1	1	1	1	1	1	1	1	1	1	3	3	3	1	1	3	1	1	3	1	3	1	1	1	1	1	1	1	1	1	1	1	1	1	3	1	3	1	1	1	1	1
wsnp_Ex_c41237_48104282	1A	216.46	3	3	1	3	1	1	1	1	1	1	1	1	1	1	1	3	3	3	1	1	3	1	1	3	1	3	1	1	3	3	3	3	1	1	1	1	1	1	1	3	1	3	1	1	1	1	1
wsnp_Ex_c44498_50537128	1A	216.46	3	3	3	1	3	3	3	3	3	3	3	3	3	3	3	1	1	1	3	3	1	3	3	1	3	1	3	3	3	3	3	3	3	3	3	3	3	3	3	1	3	1	3	3	3	3	3
wsnp_Ex_c45880_51550172	1A	216.46	3	3	3	1	3	3	3	3	3	3	3	3	3	3	3	1	1	1	3	3	1	3	3	1	3	1	3	3	3	3	3	3	3	3	3	3	3	3	3	1	3	1	3	3	3	3	3
wsnp_Ex_c4605_8239915	1A	216.46	1	1	1	3	1	1	1	1	3	1	1	3	3	1	1	3	3	1	3	3	3	3	3	3	1	3	1	3	1	1	1	1	1	1	1	3	3	3	3	3	3	1	1	3	3	1	1
wsnp_Ex_c48375_53299028	1A	216.46	1	1	1	3	1	1	1	1	1	1	1	1	1	1	1	3	3	3	1	1	3	1	1	3	1	3	1	1	1	1	1	1	1	1	1	1	1	1	1	3	1	3	1	1	1	1	1
wsnp_Ex_c49829_54319220	1A	216.46	1	1	1	1	3	3	3	3	3	3	3	3	3	3	3	1	1	1	3	3	1	3	3	1	3	1	3	3	1	1	1	1	3	3	3	3	3	3	3	1	3	1	3	3	3	3	3
wsnp_Ex_c50235_54588957	1A	216.46	1	1	3	3	1	1	1	1	1	1	1	1	1	1	1	3	3	3	1	1	3	1	1	3	1	3	1	1	1	1	1	1	1	1	1	1	1	1	1	3	1	3	1	1	1	1	1
wsnp_Ex_c6278_10941843	1A	216.46	3	3	1	3	1	1	1	1	1	1	1	NA	1	1	1	3	3	3	1	1	3	NA	1	3	1	3	1	1	3	3	3	3	1	1	1	1	1	1	1	3	1	3	1	1	1	1	1
wsnp_Ex_c645_1273590	1A	216.46	1	1	3	1	3	3	3	3	3	3	3	3	3	3	3	1	1	1	3	3	1	3	3	1	3	1	3	3	1	1	1	1	3	3	3	3	3	3	3	1	3	1	3	3	3	3	3
wsnp_Ex_c645_1273901	1A	216.46	1	1	3	1	3	3	3	3	3	3	3	3	3	3	3	1	1	1	3	3	1	3	3	1	3	1	3	3	1	1	1	1	3	3	3	3	3	3	3	1	3	1	3	3	3	3	3
wsnp_Ex_c6817_11762714	1A	216.46	1	1	1	1	3	3	3	3	1	3	3	NA	1	3	3	1	1	1	1	1	1	NA	1	1	3	1	3	1	1	1	1	1	3	3	3	1	1	1	1	1	1	1	3	1	1	3	3
wsnp_Ex_c6826_11774795	1A	216.46	3	3	1	3	1	1	1	1	1	1	1	1	1	1	1	3	3	3	1	1	3	1	1	3	1	3	1	1	3	3	3	3	1	1	1	1	1	1	1	3	1	3	1	1	1	1	1
wsnp_Ex_c6826_11775106	1A	216.46	3	3	1	3	1	1	1	1	1	1	1	1	1	1	1	3	3	3	1	1	3	1	1	3	1	3	1	1	3	3	3	3	1	1	1	1	1	1	1	3	1	3	1	1	1	1	1
wsnp_Ex_c6934_11953178	1A	216.46	1	1	3	1	3	3	3	3	3	3	3	3	3	3	3	1	1	1	3	3	1	3	3	1	3	1	3	3	1	1	1	1	3	3	3	3	3	3	3	1	3	1	3	3	3	3	3
wsnp_Ex_c7258_12461939	1A	216.46	3	3	3	3	1	1	1	1	1	1	1	1	1	1	1	3	3	3	1	1	3	1	1	3	1	3	1	1	3	3	3	3	1	NA	1	1	1	1	1	3	1	3	1	1	1	1	1
wsnp_Ex_c8162_13799067	1A	216.46	1	1	1	3	1	1	1	1	1	1	1	1	1	1	1	3	3	3	1	1	3	1	1	3	1	3	1	1	1	1	1	1	1	1	1	1	1	1	1	3	1	3	1	1	1	1	1
wsnp_Ex_c8666_14522816	1A	216.46	1	1	3	1	3	3	3	3	3	3	3	3	3	3	3	1	1	1	3	3	1	3	3	1	3	1	3	3	1	1	1	1	3	3	3	3	3	3	3	1	3	1	3	3	3	3	3
wsnp_Ex_c8885_14842394	1A	216.46	3	3	3	1	3	3	3	3	1	3	3	1	3	3	3	1	1	3	1	1	1	1	1	1	3	1	3	1	3	3	3	3	3	3	3	1	1	1	1	1	1	3	3	1	1	3	3
wsnp_Ex_rep_c101746_87053634	1A	216.46	3	3	3	1	3	3	3	3	1	3	3	1	3	3	3	1	1	3	1	1	1	1	1	1	3	1	3	1	3	3	3	3	3	3	3	1	1	1	1	1	1	3	3	1	1	3	3
wsnp_Ex_rep_c103028_88077819	1A	216.46	3	3	1	3	3	3	3	3	3	3	3	3	3	3	3	1	3	1	3	3	1	3	3	3	3	3	3	3	3	3	3	3	3	3	3	3	3	3	3	3	3	3	3	3	3	3	3
wsnp_Ex_rep_c104050_88861052	1A	216.46	1	1	3	1	3	3	3	3	3	3	3	3	3	3	3	1	1	1	3	3	1	3	3	1	3	1	3	3	1	1	1	1	3	3	3	3	3	3	3	1	3	1	3	3	3	3	3
wsnp_Ex_rep_c105244_89727666	1A	216.46	3	3	3	1	3	3	3	3	3	3	3	3	3	3	3	1	1	1	3	3	1	3	3	1	3	1	3	3	3	3	3	3	3	3	3	3	3	3	3	1	3	1	3	3	3	3	3
wsnp_Ex_rep_c105244_89727820	1A	216.46	3	3	3	1	3	3	3	3	3	3	3	3	3	3	3	1	1	1	3	3	1	3	3	1	3	1	3	3	3	3	3	3	3	3	3	3	3	3	3	1	3	1	3	3	3	3	3
wsnp_Ex_rep_c66318_64485410	1A	216.46	3	3	3	1	3	3	3	3	3	3	3	3	3	3	3	1	1	1	3	3	1	3	3	1	3	1	3	3	3	3	3	3	3	3	3	3	3	3	3	1	3	1	3	3	3	3	3
wsnp_Ex_rep_c66382_64577768	1A	216.46	1	1	1	3	1	1	1	1	1	1	1	1	1	1	1	3	3	3	1	1	3	1	1	3	1	3	1	1	1	1	1	1	1	1	1	1	1	1	1	3	1	3	1	1	1	1	1
wsnp_Ex_rep_c66767_65124989	1A	216.46	3	3	1	3	1	1	1	1	1	1	1	1	1	1	1	3	3	3	1	1	3	1	1	3	1	3	1	1	3	3	3	3	1	1	1	1	1	1	1	3	1	3	1	1	1	1	1
wsnp_Ex_rep_c66875_65276404	1A	216.46	3	3	1	3	1	1	1	1	1	1	1	1	1	1	1	3	3	3	1	1	3	1	1	3	1	3	1	1	3	3	3	3	1	1	1	1	1	1	1	3	1	3	1	1	1	1	1
wsnp_Ex_rep_c67763_66441222	1A	216.46	3	3	3	1	3	3	3	3	3	3	3	3	3	3	3	1	1	1	3	3	1	3	3	1	3	1	3	3	3	3	3	3	3	3	3	3	3	3	3	1	3	1	3	3	3	3	3
wsnp_Ex_rep_c68183_66958099	1A	216.46	3	3	1	3	1	1	1	1	1	1	1	1	1	1	1	3	3	3	1	1	3	1	1	3	1	3	1	1	3	3	3	3	1	1	1	1	1	1	1	3	1	3	1	1	1	1	1
wsnp_Ex_rep_c69738_68695568	1A	216.46	3	3	1	3	3	3	3	3	1	3	3	3	3	3	3	1	3	3	1	1	1	1	1	3	3	3	3	1	3	3	3	3	3	3	3	1	1	1	1	3	1	1	3	1	1	3	3
wsnp_Ex_rep_c69775_68731015	1A	216.46	1	1	1	3	1	1	1	1	1	1	1	1	1	1	1	3	3	3	1	1	3	1	1	3	1	3	1	1	1	1	1	1	1	1	1	1	1	1	1	3	1	3	1	1	1	1	1
wsnp_Ku_c37925_46678703	1A	216.46	1	1	1	1	3	3	3	3	1	3	3	1	1	3	3	1	1	1	1	1	1	1	1	1	3	1	3	1	1	1	1	1	3	3	3	1	1	1	1	1	1	1	3	1	1	3	3
wsnp_Ku_c4413_8008008	1A	216.46	1	1	1	1	3	3	3	3	1	3	3	1	1	3	3	1	1	1	1	1	1	1	1	1	3	1	3	1	1	1	1	1	3	3	3	1	1	1	1	1	1	1	3	1	1	3	3
wsnp_Ku_rep_c104517_90964418	1A	216.46	3	3	1	3	1	1	1	1	1	1	1	1	1	1	1	3	3	3	1	1	3	1	1	3	1	3	1	1	3	3	3	3	1	1	1	1	1	1	1	3	1	3	1	1	1	1	1
wsnp_Ku_rep_c68419_67400635	1A	216.46	1	1	3	1	3	3	3	3	3	3	3	3	3	3	3	1	1	1	3	3	1	3	3	1	3	1	3	3	1	1	1	1	3	3	3	3	3	3	3	1	3	1	3	3	3	3	3
wsnp_Ra_c20163_29413615	1A	216.46	3	3	1	3	1	1	1	1	1	1	1	1	1	1	1	3	3	3	1	1	3	1	1	3	1	3	1	1	3	3	3	3	1	1	1	1	1	1	1	3	1	3	1	1	1	1	1
wsnp_Ra_c4481_8119609	1A	216.46	1	1	1	1	3	3	3	3	1	3	3	1	1	3	3	1	1	1	1	1	1	1	1	1	3	1	3	1	1	1	1	1	3	3	3	1	1	1	1	1	1	1	3	1	1	3	3
wsnp_Ra_c6474_11298858	1A	216.46	1	1	3	1	3	3	3	3	3	3	3	3	3	3	3	1	1	1	3	3	1	3	3	1	3	1	3	3	1	1	1	1	3	3	3	3	3	3	3	1	3	1	3	3	3	3	3
wsnp_Ra_c7847_13421750	1A	216.46	3	3	1	3	1	1	1	1	1	1	1	NA	1	1	1	3	3	3	1	1	3	1	1	3	1	3	1	1	3	3	3	3	1	1	1	1	1	1	1	3	1	3	1	1	1	1	1
wsnp_Ra_rep_c74936_72685894	1A	216.46	3	3	3	1	3	3	3	3	1	3	3	1	3	3	3	1	1	3	1	1	1	1	1	1	3	1	3	1	3	3	3	3	3	3	3	1	1	1	1	1	1	3	3	1	1	3	3
wsnp_RFL_Contig1736_858448	1A	216.46	1	1	1	1	3	3	3	3	3	3	3	3	3	3	3	1	1	1	3	3	1	3	3	1	3	1	3	3	1	1	1	1	3	3	3	3	3	3	3	1	3	1	3	3	3	3	3
wsnp_RFL_Contig2185_1520256	1A	216.46	3	3	1	3	3	3	3	3	3	3	3	3	3	3	3	1	3	1	3	3	1	3	3	3	3	3	3	3	3	3	3	3	3	3	3	3	3	3	3	3	3	3	3	3	3	3	3
BS00066852_51	1A	217.76	3	3	3	3	3	3	3	3	1	1	3	3	3	3	3	3	3	3	1	3	3	1	1	3	3	3	3	1	3	3	3	3	3	3	3	1	3	3	1	3	1	3	3	1	1	3	3
BobWhite_c46349_402	1A	218.05	1	1	3	1	3	3	3	3	3	3	3	1	3	3	3	1	1	1	3	3	1	3	3	1	3	1	3	3	1	1	1	1	3	3	3	3	3	1	3	1	3	3	3	3	3	3	3
BobWhite_c478_1386	1A	218.05	3	3	1	3	1	1	1	1	1	1	1	1	1	1	1	3	3	3	1	1	3	1	1	3	1	3	1	1	3	3	3	3	1	1	1	1	1	3	1	3	1	3	1	1	1	1	1
BS00009866_51	1A	218.57	1	1	3	1	3	3	3	3	3	3	3	3	3	3	3	1	1	1	3	3	1	3	3	1	3	1	3	3	1	1	1	1	3	3	3	3	3	3	3	1	3	1	3	3	3	3	3
BS00022156_51	1A	218.57	1	1	3	1	3	3	3	3	3	3	3	3	3	3	3	1	1	1	3	3	1	3	3	1	3	1	3	3	1	1	1	1	3	3	3	3	3	1	3	1	3	1	3	3	3	3	3
BS00031200_51	1A	218.57	1	1	3	1	3	3	3	3	3	3	3	3	3	3	3	1	1	1	3	3	1	3	3	1	3	1	3	3	1	1	1	1	3	3	3	3	3	1	3	1	3	1	3	3	3	3	3
BS00062715_51	1A	218.57	1	1	3	3	3	3	3	3	1	3	3	3	3	3	3	3	3	1	1	1	3	1	1	3	3	3	3	1	1	1	1	1	3	3	3	1	1	1	1	3	1	3	3	1	1	3	3
BS00064679_51	1A	218.57	3	3	1	3	1	1	1	1	1	1	1	1	1	1	1	3	3	3	1	1	3	1	1	3	1	3	1	1	3	3	3	3	1	1	1	1	1	1	1	3	1	3	1	1	1	1	1
BS00085851_51	1A	218.57	1	1	3	1	3	3	3	3	3	3	3	3	3	3	3	1	1	1	3	3	1	3	3	1	3	1	3	3	1	1	1	1	3	3	3	3	3	3	3	1	3	1	3	3	3	3	3
BS00086680_51	1A	218.57	1	1	1	1	1	1	1	1	3	3	1	1	1	1	1	1	1	1	3	3	1	3	3	1	1	1	1	3	1	1	1	1	1	1	1	3	3	1	3	1	3	1	1	3	3	1	1
BS00095100_51	1A	218.57	1	1	3	3	3	3	3	3	3	3	3	3	3	3	3	3	3	1	3	3	3	3	3	3	3	3	3	3	1	1	1	1	3	3	3	3	3	1	3	3	3	3	3	3	3	3	3
BS00102492_51	1A	218.57	3	3	1	3	1	1	1	1	1	1	1	1	1	1	1	3	3	3	1	1	3	1	1	3	1	3	1	1	3	3	3	3	1	1	1	1	1	1	1	3	1	3	1	1	1	1	1
CAP7_c3885_73	1A	218.57	1	1	3	1	3	3	3	3	3	3	3	3	3	3	3	1	1	1	3	3	1	3	3	1	3	1	3	3	1	1	1	1	3	3	3	3	3	1	3	1	3	1	3	3	3	3	3
Excalibur_c37474_179	1A	218.57	3	3	1	3	1	1	1	1	1	1	1	1	1	1	1	3	3	3	1	1	3	1	1	3	1	3	1	1	3	3	3	3	1	1	1	1	1	3	1	3	1	3	1	1	1	1	1
Excalibur_c37474_242	1A	218.57	3	3	1	3	1	1	1	1	1	1	1	1	1	1	1	3	3	3	1	1	3	1	1	3	1	3	1	1	3	3	3	3	1	1	1	1	1	3	1	3	1	3	1	1	1	1	1
Excalibur_rep_c110450_286	1A	218.57	1	1	3	1	3	3	3	3	3	3	3	3	3	3	3	1	1	1	3	3	1	3	3	1	3	1	3	3	1	1	1	1	3	3	3	3	3	3	3	1	3	1	3	3	3	3	3
GENE.0405_237	1A	218.57	1	1	3	1	3	3	3	3	3	3	3	3	3	3	3	1	1	1	3	3	1	3	3	1	3	1	3	3	1	1	1	1	3	3	3	3	3	1	3	1	3	1	3	3	3	3	3
IAAV3552	1A	218.57	1	1	3	1	3	3	3	3	3	3	3	3	3	3	3	1	1	1	3	3	1	3	3	1	3	1	3	3	1	1	1	1	3	3	3	3	3	1	3	1	3	1	3	3	3	3	3
IAAV4916	1A	218.57	1	1	3	1	3	3	3	3	3	3	3	3	3	3	3	1	1	1	3	3	1	3	3	1	3	1	3	3	1	1	1	1	3	3	3	3	3	1	3	1	3	1	3	3	3	3	3
IACX10924	1A	218.57	1	1	3	1	3	3	3	3	3	3	3	3	3	3	3	1	1	1	3	3	1	3	3	1	3	1	3	3	1	1	1	1	3	3	3	3	3	1	3	1	3	1	3	3	3	3	3
IACX7695	1A	218.57	1	1	3	1	3	3	3	3	3	3	3	3	3	3	3	1	1	1	3	3	1	3	3	1	3	1	3	3	1	1	1	1	3	3	3	3	3	1	3	1	3	1	3	3	3	3	3
IACX8300	1A	218.57	1	1	3	1	3	3	3	3	3	3	3	3	3	3	3	1	1	1	3	3	1	3	3	1	3	1	3	3	1	1	1	1	3	3	3	3	3	3	3	1	3	1	3	3	3	3	3
Kukri_c27717_316	1A	218.57	3	3	1	3	1	1	1	1	1	1	1	1	1	1	1	3	3	3	1	1	3	1	1	3	1	3	1	1	3	3	3	3	1	1	1	1	1	3	1	3	1	3	1	1	1	1	1
Kukri_c28532_103	1A	218.57	3	3	1	3	1	1	1	1	1	1	1	1	1	1	1	3	3	3	1	1	3	1	1	3	1	3	1	1	3	3	3	3	1	1	1	1	1	3	1	3	1	3	1	1	1	1	1
Kukri_c609_328	1A	218.57	1	1	3	1	3	3	3	3	3	3	3	3	3	3	3	1	1	1	3	3	1	3	3	1	3	1	3	3	1	1	1	1	3	3	3	3	3	1	3	1	3	1	3	3	3	3	3
Ra_c10580_1629	1A	218.57	3	3	1	3	1	1	1	1	1	1	1	1	1	1	1	3	3	3	1	1	3	1	1	3	1	3	1	1	3	3	3	3	1	1	1	1	1	3	1	3	1	3	1	1	1	1	1
Ra_c2322_1067	1A	218.57	1	1	3	1	3	3	3	3	3	3	3	3	3	3	3	1	1	1	3	3	1	3	3	1	3	1	3	3	1	1	1	1	3	3	3	3	3	1	3	1	3	1	3	3	3	3	3
Ra_c2322_174	1A	218.57	3	3	1	3	1	1	1	1	1	1	1	1	1	1	1	3	3	3	1	1	3	1	1	3	1	3	1	1	3	3	3	3	1	1	1	1	1	3	1	3	1	3	1	1	1	1	1
Ra_c26970_1740	1A	218.57	3	3	1	3	1	1	1	1	1	1	1	1	1	1	1	3	3	3	1	1	3	1	1	3	1	3	1	1	3	3	3	3	1	1	1	1	1	3	1	3	1	3	1	1	1	1	1
RAC875_c41581_176	1A	218.57	1	1	3	1	3	3	3	3	3	3	3	3	3	3	3	1	1	1	3	3	1	3	3	1	3	1	3	3	1	1	1	1	3	3	3	3	3	1	3	1	3	1	3	3	3	3	3
RAC875_c49760_107	1A	218.57	3	3	1	3	1	1	1	1	1	1	1	1	1	1	1	3	3	3	1	1	3	1	1	3	1	3	1	1	3	3	3	3	1	1	1	1	1	3	1	3	1	3	1	1	1	1	1
RAC875_rep_c105092_114	1A	218.57	3	3	1	3	1	1	1	1	1	1	1	1	1	1	1	3	3	3	1	1	3	1	1	3	1	3	1	1	3	3	3	3	1	1	1	1	1	3	1	3	1	3	1	1	1	1	1
RFL_Contig5450_993	1A	218.57	3	3	1	3	1	1	1	1	1	1	1	1	1	1	1	3	3	3	1	1	3	1	1	3	1	3	1	1	3	3	3	3	1	1	1	1	1	3	1	3	1	3	1	1	1	1	1
TA001042.0912	1A	218.57	1	1	3	1	3	3	3	3	3	3	3	3	3	3	3	1	1	1	3	3	1	3	3	1	3	1	3	3	1	1	1	1	3	3	3	3	3	1	3	1	3	1	3	3	3	3	3
Tdurum_contig43360_1381	1A	218.57	3	3	1	3	1	1	1	1	1	1	1	1	1	1	1	3	3	3	1	1	3	1	1	3	1	3	1	1	3	3	3	3	1	1	1	1	1	3	1	3	1	3	1	1	1	1	1
Tdurum_contig43360_1592	1A	218.57	1	1	3	1	3	3	3	3	3	3	3	3	3	3	3	1	1	1	3	3	1	3	3	1	3	1	3	3	1	1	1	1	3	3	3	3	3	1	3	1	3	1	3	3	3	3	3
Tdurum_contig81558_272	1A	218.57	1	1	3	1	3	3	3	3	3	3	3	3	3	3	3	1	1	1	3	3	1	3	3	1	3	1	3	3	1	1	1	1	3	3	3	3	3	1	3	1	3	1	3	3	3	3	3
wsnp_Ex_c1427_2736441	1A	218.57	3	3	3	3	3	3	3	3	3	3	3	3	3	3	3	3	3	3	3	3	3	3	3	3	3	3	3	3	3	3	3	3	3	3	3	3	3	1	3	3	3	3	3	3	3	3	3
wsnp_Ex_c15188_23387523	1A	218.57	3	3	1	3	1	1	1	1	1	1	1	1	1	1	1	3	3	3	1	1	3	1	1	3	1	3	1	1	3	3	3	3	1	1	1	1	1	3	1	3	1	3	1	1	1	1	1
wsnp_Ex_c1959_3692097	1A	218.57	1	1	3	1	3	3	3	3	3	3	3	3	3	3	3	1	1	1	3	3	1	3	3	1	3	1	3	3	1	1	1	1	3	3	3	3	3	1	3	1	3	1	3	3	3	3	3
wsnp_Ex_c2178_4086161	1A	218.57	1	1	3	1	3	3	3	3	3	3	3	3	3	3	3	1	1	1	3	3	1	3	3	1	3	1	3	3	1	1	1	1	3	3	3	3	3	1	3	1	3	1	3	3	3	3	3
wsnp_Ex_c5634_9906981	1A	218.57	3	3	1	3	1	1	1	1	3	1	1	1	1	1	1	3	3	3	3	3	3	3	3	3	1	3	1	3	3	3	3	3	1	1	1	3	3	1	3	3	3	3	1	3	3	1	1
wsnp_Ex_c5634_9907829	1A	218.57	3	3	1	3	1	1	1	1	3	1	1	1	1	1	1	3	3	3	3	3	3	3	3	3	1	3	1	3	3	3	3	3	1	1	1	3	3	1	3	3	3	3	1	3	3	1	1
wsnp_Ku_c30921_40705731	1A	218.57	3	3	1	3	1	1	1	1	1	1	1	1	1	1	1	3	3	3	1	1	3	1	1	3	1	3	1	1	3	3	3	3	1	1	1	1	1	3	1	3	1	3	1	1	1	1	1
wsnp_Ra_c34203_42948357	1A	218.57	3	3	1	3	1	1	1	1	1	1	1	1	1	1	1	3	3	3	1	1	3	1	1	3	1	3	1	1	3	3	3	3	1	1	1	1	1	3	1	3	1	3	1	1	1	1	1
wsnp_Ra_c41581_48764320	1A	218.57	3	3	1	3	1	1	1	1	1	1	1	1	1	1	1	3	3	3	1	1	3	1	1	3	1	3	1	1	3	3	3	3	1	1	1	1	1	3	1	3	1	3	1	1	1	1	1
wsnp_RFL_Contig2808_2585736	1A	218.57	3	3	1	3	1	1	1	1	1	1	1	1	1	1	1	3	3	3	1	1	3	1	1	3	1	3	1	1	3	3	3	3	1	1	1	1	1	3	1	3	1	3	1	1	1	1	1
Ex_c21450_396	1A	218.75	1	1	1	1	1	1	1	1	1	1	1	1	1	1	1	1	1	1	1	1	1	1	1	1	1	1	1	1	1	1	1	1	1	1	1	1	1	3	1	1	1	1	1	1	1	1	1
Ku_c2898_783	1A	218.75	3	3	3	3	3	3	3	3	3	3	3	3	3	3	3	3	3	3	3	3	3	3	3	3	3	3	3	3	3	3	3	3	3	3	3	3	3	1	3	3	3	3	3	3	3	3	3
Ra_c69908_1877	1A	218.75	3	3	3	3	3	3	3	3	3	3	3	3	3	3	3	3	3	3	3	3	3	3	3	3	3	3	3	3	3	3	3	3	3	3	3	3	3	1	3	3	3	3	3	3	3	3	3
wsnp_Ex_c10595_17291999	1A	218.75	1	1	1	1	1	1	1	1	1	1	1	1	1	1	1	1	1	1	1	1	1	1	1	1	1	1	1	1	1	1	1	1	1	1	1	1	1	3	1	1	1	1	1	1	1	1	1
wsnp_Ra_c20126_29372577	1A	218.75	1	1	1	1	1	1	1	1	1	1	1	1	1	1	1	1	1	1	1	1	1	1	1	1	1	1	1	1	1	1	1	1	1	1	1	1	1	3	1	1	1	1	1	1	1	1	1
Ex_c12584_2014	1A	219.38	1	1	1	1	1	1	1	1	1	1	1	1	3	1	1	3	1	1	1	1	3	1	1	1	1	1	1	1	1	1	1	1	1	1	1	1	1	3	1	1	1	1	1	1	1	1	1
Ex_c25689_1603	1A	219.38	3	3	3	3	3	3	3	3	3	3	3	3	1	3	3	1	3	3	3	3	1	3	3	3	3	3	3	3	3	3	3	3	3	3	3	3	3	1	3	3	3	3	3	3	3	3	3
Ex_c25689_1606	1A	219.38	1	1	1	1	1	1	1	1	1	1	1	1	3	1	1	3	1	1	1	1	3	1	1	1	1	1	1	1	1	1	1	1	1	1	1	1	1	3	1	1	1	1	1	1	1	1	1
Ex_c5759_663	1A	219.38	3	3	1	1	1	1	1	1	3	1	1	1	1	1	1	1	1	3	3	3	1	3	3	1	1	1	1	3	3	3	3	3	1	1	1	3	3	3	3	1	3	1	1	3	3	1	1
GENE.1214_288	1A	219.38	3	3	1	1	1	1	1	1	3	1	1	1	1	1	1	1	1	3	3	3	1	3	3	1	1	1	1	3	3	3	3	3	1	1	1	3	3	3	3	1	3	1	1	3	3	1	1
IAAV5939	1A	219.38	3	3	3	3	3	3	3	3	3	3	3	3	1	3	3	1	3	3	3	3	1	3	3	3	3	3	3	3	3	3	3	3	3	3	3	3	3	1	3	3	3	3	3	3	3	3	3
JD_c63991_766	1A	219.38	3	3	3	3	3	3	3	3	3	3	3	3	1	3	3	1	3	3	3	3	1	3	3	3	3	3	3	3	3	3	3	3	3	3	3	3	3	1	3	3	3	3	3	3	3	3	3
Ku_c23960_333	1A	219.38	1	1	1	1	1	1	1	1	1	1	1	1	3	1	1	3	1	1	1	1	3	1	1	1	1	1	1	1	1	1	1	1	1	1	1	1	1	3	1	1	1	1	1	1	1	1	1
Ra_c54249_1031	1A	219.38	3	3	3	3	3	3	3	3	3	3	3	3	1	3	3	1	3	3	3	3	1	3	3	3	3	3	3	3	3	3	3	3	3	3	3	3	3	1	3	3	3	3	3	3	3	3	3
RAC875_rep_c104557_1245	1A	219.38	3	3	3	3	3	3	3	3	3	3	3	3	1	3	3	1	3	3	3	3	1	3	3	3	3	3	3	3	3	3	3	3	3	3	3	3	3	1	3	3	3	3	3	3	3	3	3
RFL_Contig3715_263	1A	219.38	3	3	1	3	1	1	1	1	1	1	1	3	1	1	1	1	3	3	1	1	1	1	1	3	1	3	1	1	3	3	3	3	1	1	1	1	1	1	1	3	1	1	1	1	1	1	1
RFL_Contig530_2305	1A	219.38	3	3	3	3	1	1	1	1	1	1	1	3	3	1	1	3	3	3	1	1	3	1	1	3	1	3	1	1	3	3	3	3	1	1	1	1	1	3	1	3	1	3	1	1	1	1	1
TA004725.0348	1A	219.38	3	3	3	3	1	1	1	1	1	1	1	3	3	1	1	3	3	3	1	1	3	1	1	3	1	3	1	1	3	3	3	3	1	1	1	1	1	3	1	3	1	3	1	1	1	1	1
Tdurum_contig92564_326	1A	219.38	1	1	1	1	1	1	1	1	1	1	1	1	3	1	1	3	1	1	1	1	3	1	1	1	1	1	1	1	1	1	1	1	1	1	1	1	1	3	1	1	1	1	1	1	1	1	1
wsnp_Ex_c22963_32183009	1A	219.38	1	1	1	1	1	1	1	1	1	1	1	1	3	1	1	3	1	1	1	1	3	1	1	1	1	1	1	1	1	1	1	1	1	1	1	1	1	3	1	1	1	1	1	1	1	1	1
wsnp_Ex_c43454_49770425	1A	219.38	3	3	1	1	1	1	1	1	3	1	1	1	1	1	1	1	1	3	3	3	1	3	3	1	1	1	1	3	3	3	3	3	1	1	1	3	3	3	3	1	3	1	1	3	3	1	1
wsnp_Ex_c7271_12483592	1A	219.38	1	1	3	3	3	3	3	3	1	3	3	3	3	3	3	3	3	1	1	1	3	1	1	3	3	3	3	1	1	1	1	1	3	3	3	1	1	1	1	3	1	3	3	1	1	3	3
wsnp_Ex_rep_c105541_89932598	1A	219.38	3	3	1	3	1	1	1	1	3	1	1	3	1	1	1	3	3	3	3	3	3	3	3	3	1	3	1	3	3	3	3	3	1	1	1	3	3	3	3	3	3	1	1	3	3	1	1
wsnp_Ku_c17726_26872129	1A	219.38	1	1	3	1	3	3	3	3	1	3	3	1	3	3	3	1	1	1	1	1	1	1	1	1	3	1	3	1	1	1	1	1	3	3	3	1	1	1	1	1	1	3	3	1	1	3	3
BobWhite_c12841_56	1A	219.53	3	3	3	3	1	1	1	1	3	1	1	3	3	1	1	3	3	3	3	3	3	3	3	3	1	3	1	3	3	3	3	3	1	1	1	3	3	3	3	3	3	3	1	3	3	1	1
BobWhite_c1488_504	1A	219.53	3	3	1	3	1	1	1	1	3	1	1	3	1	1	1	3	3	3	3	3	3	3	3	3	1	3	1	3	3	3	3	3	1	1	1	3	3	3	3	3	3	1	1	3	3	1	1
BS00094681_51	1A	219.53	3	3	3	3	1	1	1	1	3	1	1	3	3	1	1	3	3	3	3	3	3	3	3	3	1	3	1	3	3	3	3	3	1	1	1	3	3	3	3	3	3	3	1	3	3	1	1
CAP12_c6266_187	1A	219.53	1	1	3	1	3	3	3	3	1	3	3	NA	3	3	3	1	1	1	1	1	1	1	1	1	3	1	3	1	1	1	1	NA	3	3	3	1	1	1	1	1	1	3	3	1	1	3	3
CAP12_c6266_298	1A	219.53	1	1	3	1	3	3	3	3	1	3	3	1	3	3	3	1	1	1	1	1	1	1	1	1	3	1	3	1	1	1	1	1	3	3	3	1	1	1	1	1	1	3	3	1	1	3	3
CAP12_c6266_339	1A	219.53	3	3	1	3	1	1	1	1	3	1	1	3	1	1	1	3	3	3	3	3	3	3	3	3	1	3	1	3	3	3	3	3	1	1	1	3	3	3	3	3	3	1	1	3	3	1	1
CAP7_c3269_236	1A	219.53	3	3	1	3	1	1	1	1	3	1	1	3	1	1	1	3	3	3	3	3	3	3	3	3	1	3	1	3	3	3	3	3	1	1	1	3	3	3	3	3	3	1	1	3	3	1	1
CAP8_c2843_226	1A	219.53	3	3	1	3	1	1	1	1	3	1	1	NA	1	1	1	3	3	3	3	3	3	3	3	3	1	3	1	3	3	3	3	3	1	1	1	3	3	3	3	3	3	1	1	3	3	1	1
CAP8_c4897_397	1A	219.53	NA	1	3	1	3	3	3	3	1	3	3	1	3	3	3	1	1	1	1	1	1	NA	1	1	3	1	3	1	1	1	1	1	3	3	3	1	1	1	1	1	1	3	3	1	1	3	3
D_contig04348_649	1A	219.53	3	3	3	1	3	3	3	3	1	3	3	1	3	NA	3	1	1	3	1	1	1	1	1	1	3	1	3	1	3	3	3	3	3	3	3	1	1	1	1	1	1	3	3	1	1	3	3
Ex_c12763_662	1A	219.53	3	3	1	3	1	1	1	1	3	1	1	3	1	1	1	3	3	3	3	3	3	3	3	3	1	3	1	3	3	3	3	3	1	1	1	3	3	3	3	3	3	1	1	3	3	1	1
Ex_c4121_1205	1A	219.53	3	3	3	3	3	3	3	3	3	3	3	3	1	3	3	1	3	3	3	3	1	3	3	3	3	3	3	3	3	3	3	3	3	3	3	3	3	1	3	3	3	3	3	3	3	3	3
Ex_c42595_2332	1A	219.53	3	3	3	3	3	3	3	3	3	3	3	3	3	3	3	3	3	3	3	3	3	3	3	3	3	3	3	3	3	3	3	3	3	3	3	3	3	1	3	3	3	3	3	3	3	3	3
Ex_c5759_628	1A	219.53	3	3	1	1	1	1	1	1	3	1	1	1	1	1	1	1	1	3	3	3	1	3	3	1	1	1	1	3	3	3	3	3	1	1	1	3	3	3	3	1	3	1	1	3	3	1	1
Excalibur_c11273_284	1A	219.53	3	3	1	3	1	1	1	1	3	1	1	3	1	1	1	3	3	3	3	3	3	3	3	3	1	3	1	3	3	3	3	3	1	1	1	3	3	3	3	3	3	1	1	3	3	1	1
Excalibur_c13489_867	1A	219.53	3	3	3	3	3	3	3	1	1	1	3	3	3	1	3	3	3	3	3	1	3	3	1	3	1	3	1	3	3	3	3	3	3	3	3	1	1	3	3	3	3	3	3	3	1	3	3
Excalibur_c14943_695	1A	219.53	3	3	1	3	1	1	1	1	3	1	1	3	1	1	1	3	3	3	3	3	3	3	3	3	1	3	1	3	3	3	3	3	1	1	1	3	3	3	3	3	3	1	1	3	3	1	1
Excalibur_rep_c107144_405	1A	219.53	1	1	1	1	3	3	3	3	1	3	3	1	1	3	3	1	1	1	1	1	1	1	1	1	3	1	3	1	1	1	1	1	3	3	3	1	1	1	1	1	1	1	3	1	1	3	3
Excalibur_rep_c68424_255	1A	219.53	3	3	1	3	1	1	NA	1	3	NA	1	3	1	1	1	3	3	3	3	3	3	3	3	3	1	3	1	3	3	3	3	3	1	1	1	3	3	3	3	3	3	1	1	3	3	1	1
Excalibur_rep_c86757_244	1A	219.53	1	1	3	1	3	3	3	3	1	3	3	1	3	3	3	1	1	1	1	1	1	1	1	1	3	1	3	1	1	1	1	1	3	3	3	1	1	1	1	1	1	3	3	1	1	3	3
GENE.0053_224	1A	219.53	1	1	3	1	3	3	3	3	1	3	3	1	1	3	3	1	1	1	1	1	1	1	1	1	3	1	3	1	1	1	1	1	3	3	3	1	1	1	1	1	1	3	3	1	1	3	3
GENE.0126_140	1A	219.53	3	3	3	1	3	3	3	3	1	3	3	NA	3	3	3	1	1	3	1	1	1	NA	1	1	3	1	3	1	3	3	3	3	3	3	3	1	1	1	1	1	1	3	3	1	1	3	3
GENE.0235_245	1A	219.53	3	3	3	3	1	1	1	1	3	1	1	3	3	1	1	3	3	3	3	3	3	3	3	3	1	3	1	3	3	3	3	3	1	1	1	3	3	3	3	3	3	3	1	3	3	1	1
IAAV5730	1A	219.53	3	3	1	1	1	1	1	1	3	1	1	1	1	1	1	1	1	3	3	3	1	3	3	1	1	1	1	3	3	3	3	3	1	1	1	3	3	3	3	1	3	1	1	3	3	1	1
IAAV7131	1A	219.53	3	3	1	3	1	1	1	1	3	1	1	3	1	1	1	3	3	3	3	3	3	3	3	3	1	3	1	3	3	3	3	3	1	1	1	3	3	3	3	3	3	1	1	3	3	1	1
IAAV749	1A	219.53	1	1	3	1	3	3	3	3	1	3	3	1	3	3	3	1	1	1	1	1	1	1	1	1	3	1	3	1	1	1	1	1	3	3	3	1	1	1	1	1	1	3	3	1	1	3	3
IAAV8147	1A	219.53	3	3	1	1	1	1	1	1	3	1	1	1	1	1	1	1	1	3	3	3	1	3	3	1	1	1	1	3	3	3	3	3	1	1	1	3	3	3	3	1	3	1	1	3	3	1	1
IACX2325	1A	219.53	1	1	1	3	1	1	1	1	3	1	1	3	1	1	1	3	3	1	3	3	3	3	3	3	1	3	1	3	1	1	1	1	1	1	1	3	3	3	3	3	3	1	1	3	3	1	1
IACX293	1A	219.53	3	3	3	3	1	1	1	1	3	1	1	3	3	1	1	3	3	3	3	3	3	3	3	3	1	3	1	3	3	3	3	3	1	1	1	3	3	3	3	3	3	3	1	3	3	1	1
Kukri_c12165_1148	1A	219.53	1	1	1	1	3	3	3	3	1	3	3	1	1	3	3	1	1	1	1	1	1	1	1	1	3	1	3	1	1	1	1	1	3	3	3	1	1	1	1	1	1	1	3	1	1	3	3
Kukri_c32885_145	1A	219.53	3	3	3	1	3	3	3	3	1	3	3	1	3	NA	3	1	1	3	1	1	1	1	1	1	3	1	3	1	3	3	3	3	3	3	3	1	1	1	1	1	1	3	3	1	1	3	3
Kukri_rep_c101316_375	1A	219.53	1	1	1	3	1	1	1	1	3	1	1	3	1	1	1	3	3	1	3	3	3	3	3	3	1	3	1	3	1	1	1	1	1	1	1	3	3	3	3	3	3	1	1	3	3	1	1
Kukri_rep_c103147_745	1A	219.53	3	3	1	3	1	1	1	1	3	1	1	3	1	1	1	3	3	3	3	3	3	3	3	3	1	3	1	3	3	3	3	3	1	1	1	3	3	3	3	3	3	1	1	3	3	1	1
Kukri_rep_c115954_137	1A	219.53	1	1	1	1	3	3	3	3	1	3	3	1	1	3	3	1	1	1	1	1	1	1	1	1	3	1	3	1	1	1	1	1	3	3	3	1	1	1	1	1	1	1	3	1	1	3	3
Ra_c272_1632	1A	219.53	3	3	3	1	3	3	3	3	1	3	3	1	3	3	3	1	1	3	1	1	1	1	1	1	3	1	3	1	3	3	3	3	3	3	3	1	1	1	1	1	1	3	3	1	1	3	3
RAC875_c25799_457	1A	219.53	3	3	3	3	1	1	1	1	3	1	1	3	3	1	1	3	3	3	3	3	3	3	3	3	1	3	1	3	3	3	3	3	1	1	1	3	3	3	3	3	3	3	1	3	3	1	1
RAC875_c31168_238	1A	219.53	3	3	3	3	1	1	1	1	3	1	1	3	3	1	1	3	3	3	3	3	3	3	3	3	1	3	1	3	3	3	3	3	1	1	1	3	3	3	3	3	3	3	1	3	3	1	1
RAC875_c33300_141	1A	219.53	3	3	1	3	1	1	1	1	3	1	1	3	1	1	1	3	3	3	3	3	3	3	3	3	1	3	1	3	3	3	3	3	1	1	1	3	3	3	3	3	3	1	1	3	3	1	1
RAC875_c68797_400	1A	219.53	3	3	1	3	1	1	1	1	3	1	1	3	1	1	1	3	3	3	3	3	3	3	3	3	1	3	1	3	3	3	3	3	1	1	1	3	3	3	3	3	3	1	1	3	3	1	1
RFL_Contig5001_1099	1A	219.53	3	3	1	3	1	1	1	1	3	1	1	3	1	1	1	3	3	3	3	3	3	3	3	3	1	3	1	3	3	3	3	3	1	1	1	3	3	3	3	3	3	1	1	3	3	1	1
Tdurum_contig55009_1153	1A	219.53	3	3	3	1	3	3	3	3	1	3	3	1	1	3	3	1	1	3	1	1	1	1	1	1	3	1	3	1	3	3	3	3	3	3	3	1	1	1	1	1	1	3	3	1	1	3	3
tplb0041a22_935	1A	219.53	3	3	3	3	3	3	3	3	1	3	3	3	3	3	3	3	3	3	3	1	3	3	1	3	3	3	3	3	3	3	3	3	3	3	3	1	1	3	3	3	3	3	3	3	1	3	3
wsnp_Ex_c10100_16600633	1A	219.53	1	1	1	1	3	3	3	3	1	3	3	1	1	3	3	1	1	1	1	1	1	1	1	1	3	1	3	1	1	1	1	1	3	3	3	1	1	1	1	1	1	1	3	1	1	3	3
wsnp_Ex_c13564_21327699	1A	219.53	1	1	3	1	3	3	3	3	1	3	3	1	3	3	3	1	1	1	1	1	1	1	1	1	3	1	3	1	1	1	1	1	3	3	3	1	1	1	1	1	1	3	3	1	1	3	3
wsnp_Ex_c1374_2630830	1A	219.53	1	1	1	3	1	1	1	1	3	1	1	3	1	1	1	3	3	1	3	3	3	3	3	3	1	3	1	3	1	1	1	1	1	1	1	3	3	3	3	3	3	1	1	3	3	1	1
wsnp_Ex_c1374_2630879	1A	219.53	1	1	3	1	3	3	3	3	1	3	3	1	3	3	3	1	1	1	1	1	1	1	1	1	3	1	3	1	1	1	1	1	3	3	3	1	1	1	1	1	1	3	3	1	1	3	3
wsnp_Ex_c14361_22341570	1A	219.53	3	3	3	3	3	3	3	3	3	3	3	3	1	3	3	1	3	3	3	3	1	3	NA	3	3	3	3	3	3	3	3	3	3	3	3	3	3	1	3	3	3	3	3	3	3	3	3
wsnp_Ex_c2840_5247386	1A	219.53	1	1	3	1	3	3	3	3	1	3	3	1	3	3	3	1	1	1	1	1	1	1	1	1	3	1	3	1	1	1	1	1	3	3	3	1	1	1	1	1	1	3	3	1	1	3	3
wsnp_Ex_c34260_42602746	1A	219.53	3	3	1	3	1	1	1	1	3	1	1	3	1	1	1	3	3	3	3	3	3	3	3	3	1	3	1	3	3	3	3	3	1	1	1	3	3	3	3	3	3	1	1	3	3	1	1
wsnp_Ex_c35563_43690084	1A	219.53	3	3	3	3	1	1	1	1	3	1	1	3	3	1	1	3	3	3	3	3	3	3	3	3	1	3	1	3	3	3	3	3	1	1	1	3	3	3	3	3	3	3	1	3	3	1	1
wsnp_Ex_c3572_6531810	1A	219.53	1	1	1	3	1	1	1	1	3	1	1	3	1	1	1	3	3	1	3	3	3	3	3	3	1	3	1	3	1	1	1	1	1	1	1	3	3	3	3	3	3	1	1	3	3	1	1
wsnp_Ex_c3986_7217641	1A	219.53	1	1	1	1	3	3	3	3	1	3	3	1	1	3	3	1	1	1	1	1	1	1	1	1	3	1	3	1	1	1	1	1	3	3	3	1	1	1	1	1	1	1	3	1	1	3	3
wsnp_Ex_c41969_48673442	1A	219.53	3	3	3	1	3	3	3	3	1	3	3	1	3	3	3	1	1	3	1	1	1	1	1	1	3	1	3	1	3	3	3	3	3	3	3	1	1	1	1	1	1	3	3	1	1	3	3
wsnp_Ex_c44049_50205457	1A	219.53	3	3	3	1	3	3	3	3	1	3	3	1	3	3	3	1	1	3	1	1	1	NA	1	1	3	1	3	1	3	3	3	3	3	3	3	1	1	1	1	1	1	3	3	1	1	3	3
wsnp_Ex_c44049_50205904	1A	219.53	1	1	1	3	1	1	1	1	3	1	1	3	1	1	1	3	3	1	3	3	3	3	3	3	1	3	1	3	1	1	1	1	1	1	1	3	3	3	3	3	3	1	1	3	3	1	1
wsnp_Ex_c4605_8241260	1A	219.53	3	3	3	1	3	3	3	3	1	3	3	1	1	3	3	1	1	3	1	1	1	1	1	1	3	1	3	1	3	3	3	3	3	3	3	1	1	1	1	1	1	3	3	1	1	3	3
wsnp_Ex_c5543_9763520	1A	219.53	3	3	3	3	1	1	1	1	3	1	1	3	3	1	1	3	3	3	3	3	3	3	3	3	1	3	1	3	3	3	3	3	1	1	1	3	3	3	3	3	3	3	1	3	3	1	1
wsnp_Ex_c572_1138503	1A	219.53	3	3	3	3	3	3	3	3	1	3	3	3	3	3	3	3	3	3	1	1	3	1	1	3	1	3	3	1	3	1	3	3	3	3	3	1	1	3	1	3	1	3	3	1	1	3	3
wsnp_Ex_c8364_14095508	1A	219.53	1	1	3	3	3	3	3	3	NA	3	3	3	3	3	3	3	3	1	1	1	3	1	1	3	3	3	3	1	1	1	1	1	3	3	3	1	1	1	1	3	1	3	3	1	1	3	3
wsnp_Ex_rep_c103087_88123733	1A	219.53	3	3	1	3	1	1	1	1	3	1	1	3	1	1	1	3	3	3	3	3	3	3	3	3	1	3	1	3	3	3	3	3	1	1	1	3	3	3	3	3	3	1	1	3	3	1	1
wsnp_JD_c40990_29127031	1A	219.53	3	3	3	3	1	1	1	1	3	1	1	3	1	1	1	3	3	3	3	3	3	3	3	3	1	3	1	3	3	3	3	3	1	1	1	3	3	3	3	3	3	3	1	3	3	1	1
wsnp_Ku_c37925_46679146	1A	219.53	3	3	3	3	1	1	1	1	3	1	1	3	3	1	1	3	3	3	3	3	3	3	3	3	1	3	1	3	3	3	3	3	1	1	1	3	3	3	3	3	3	3	1	3	3	1	1
wsnp_Ku_c47386_53862969	1A	219.53	1	1	1	1	3	3	3	3	1	3	3	1	1	3	3	1	1	1	1	1	1	1	1	1	3	1	3	1	1	1	1	1	3	3	3	1	1	1	1	1	1	1	3	1	1	3	3
wsnp_Ra_c18045_27024765	1A	219.53	3	3	1	3	1	1	1	1	3	1	1	3	1	1	1	3	3	3	3	3	3	3	3	3	1	3	1	3	3	3	3	3	1	1	1	3	3	3	3	3	3	1	1	3	3	1	1
wsnp_Ra_c6182_10833256	1A	219.53	1	1	1	3	1	1	1	1	3	1	1	3	1	1	1	3	3	1	3	3	3	3	3	3	1	3	1	3	1	1	1	1	1	1	1	3	3	3	3	3	3	1	1	3	3	1	1
Excalibur_c15098_591	1A	220.71	1	1	3	1	3	3	3	3	1	3	3	NA	3	3	3	1	1	1	1	1	1	1	1	1	3	1	3	1	1	1	1	1	3	3	3	1	1	1	1	1	1	3	3	1	1	3	3
Excalibur_c3565_2673	1A	220.71	3	3	3	3	1	1	1	1	3	1	1	3	3	1	1	3	3	3	3	3	3	3	3	3	1	3	1	3	3	3	3	3	1	1	1	3	3	3	3	3	3	3	1	3	3	1	1
GENE.0071_115	1A	220.71	3	3	1	3	1	1	1	1	3	1	1	3	1	1	1	3	3	3	3	3	3	3	3	3	1	3	1	3	3	3	3	3	1	1	1	3	3	3	3	3	3	1	1	3	3	1	1
IAAV7203	1A	220.71	3	3	1	1	3	3	1	3	1	3	1	1	1	3	1	1	1	3	1	1	1	1	1	1	1	1	3	1	3	1	3	3	3	3	1	1	1	3	1	1	1	1	1	1	1	1	1
Kukri_c22434_513	1A	220.71	1	1	3	3	1	1	3	1	3	1	3	3	3	1	3	3	3	1	3	3	3	3	3	3	3	3	1	3	1	3	1	1	1	1	3	3	3	1	3	3	3	3	3	3	3	3	3
Kukri_c47825_138	1A	220.71	3	3	1	3	1	1	1	1	3	1	1	3	1	1	1	3	3	3	3	3	3	3	3	3	1	3	1	3	3	3	3	3	1	1	1	3	3	3	3	3	3	1	1	3	3	1	1
Kukri_c67601_267	1A	220.71	1	1	1	3	1	1	1	1	3	1	1	3	3	1	1	3	3	1	3	3	3	3	3	3	1	3	1	3	1	1	1	1	1	1	1	3	3	3	3	3	3	1	1	3	3	1	1
Kukri_rep_c106037_96	1A	220.71	3	3	3	3	1	1	1	1	3	1	1	3	3	NA	1	3	3	3	3	3	3	3	3	3	1	3	1	3	3	3	3	3	1	1	1	3	3	3	3	3	3	3	1	3	3	1	1
Ra_c2895_591	1A	220.71	3	3	1	1	3	3	1	3	1	3	1	1	1	3	1	1	1	3	1	1	1	1	1	1	1	1	3	1	3	1	3	3	3	3	1	1	1	3	1	1	1	1	1	1	1	1	1
Tdurum_contig48416_335	1A	220.71	3	3	1	3	1	1	1	1	3	1	1	3	1	1	1	3	3	3	3	3	3	3	3	3	1	3	1	3	3	3	3	3	1	1	1	3	3	3	3	3	3	1	1	3	3	1	1
wsnp_Ex_c21592_30743513	1A	220.71	1	1	1	3	1	1	1	1	3	1	1	NA	1	1	1	3	3	1	3	3	3	3	3	3	1	3	1	3	1	1	1	1	1	1	1	3	3	3	3	3	3	1	1	3	3	1	1
wsnp_Ex_c21592_30743815	1A	220.71	3	3	1	3	1	1	1	1	3	1	1	3	1	1	1	3	3	3	3	3	3	3	3	3	1	3	1	3	3	3	3	3	1	1	1	3	3	3	3	3	3	1	1	3	3	1	1
wsnp_Ex_c34260_42602649	1A	220.71	3	3	1	3	1	1	1	1	3	1	1	3	1	1	1	3	3	3	3	3	3	3	3	3	1	3	1	3	3	3	3	3	1	1	1	3	3	3	3	3	3	1	1	3	3	1	1
wsnp_Ex_c34821_43076533	1A	220.71	1	1	3	1	3	3	3	3	1	3	3	1	3	3	3	1	1	1	1	1	1	1	1	1	3	1	3	1	1	1	1	1	3	3	3	1	1	1	1	1	1	3	3	1	1	3	3
wsnp_Ex_c3565_6521098	1A	220.71	1	1	1	1	3	3	3	3	1	3	3	1	1	3	3	1	1	1	1	1	1	1	1	1	3	1	3	1	1	1	1	1	3	3	3	1	1	1	1	1	1	1	3	1	1	3	3
wsnp_Ex_c4605_8240189	1A	220.71	1	1	1	3	1	1	1	1	3	1	1	3	3	1	1	3	3	1	3	3	3	3	3	3	1	3	1	3	1	1	1	1	1	1	1	3	3	3	3	3	3	1	1	3	3	1	1
wsnp_Ex_c572_1138339	1A	220.71	3	3	1	1	3	3	1	3	1	3	1	1	1	3	1	1	1	3	1	1	1	1	1	1	1	1	3	1	3	1	3	3	3	3	1	1	1	3	1	1	1	1	1	1	1	1	1
wsnp_Ex_c572_1138770	1A	220.71	3	3	1	1	3	3	1	3	1	3	1	1	1	3	1	1	1	3	1	1	1	1	1	1	1	1	3	1	3	1	3	3	3	3	1	1	1	3	1	1	1	1	1	1	1	1	1
wsnp_Ex_rep_c101414_86781128	1A	220.71	1	1	1	3	1	1	1	1	3	1	1	3	3	1	1	3	3	1	3	3	3	3	3	3	1	3	1	3	1	1	1	1	1	1	1	3	3	3	3	3	3	1	1	3	3	1	1
wsnp_Ku_c4018_7333828	1A	220.71	1	1	3	3	1	1	3	1	3	1	3	3	3	1	3	3	3	1	3	3	3	3	3	3	3	3	1	3	1	3	1	1	1	1	3	3	3	1	3	3	3	3	3	3	3	3	3
wsnp_Ra_c2895_5488879	1A	220.71	3	3	1	1	3	3	1	3	1	3	1	1	1	3	1	1	1	3	1	1	1	1	1	1	1	1	3	1	3	1	3	3	3	3	1	1	1	3	1	1	1	1	1	1	1	1	1
Excalibur_c14494_854	1A	221.23	3	3	1	1	1	1	1	1	1	1	1	1	1	1	1	1	1	1	1	1	1	1	1	1	1	1	1	1	3	3	3	3	1	1	1	1	1	1	1	1	1	1	1	1	1	1	1
RAC875_c1080_523	1A	221.23	1	1	1	1	1	1	1	1	3	3	1	1	1	1	1	1	1	3	1	1	1	1	1	1	1	1	1	1	1	1	1	1	3	1	1	1	1	1	1	1	1	1	3	1	1	1	1
Tdurum_contig10996_2485	1A	221.23	1	1	3	3	3	3	3	3	3	3	3	3	3	3	3	3	3	1	3	3	3	3	3	3	3	3	3	3	1	1	1	1	3	3	3	3	3	3	3	3	3	3	3	3	3	3	3
wsnp_Ex_c15722_24074399	1A	221.23	1	1	3	1	3	3	3	3	3	3	3	3	3	3	3	1	1	1	3	3	1	3	3	1	3	1	3	3	1	1	1	1	3	3	3	3	3	3	3	1	3	1	3	3	3	3	3
BobWhite_c4942_140	1A	224.2	3	3	1	3	1	1	1	1	1	1	1	3	3	1	1	1	3	3	1	1	1	1	1	3	1	3	1	1	3	3	3	3	1	1	1	1	1	1	1	3	1	1	1	1	1	1	1
Excalibur_rep_c84731_611	1A	224.2	3	3	1	3	1	1	1	1	1	1	1	3	3	1	1	1	3	3	1	1	1	1	1	3	1	3	1	1	3	3	3	3	1	1	1	1	1	1	1	3	1	1	1	1	1	1	1
GENE.0283_330	1A	224.2	1	1	3	1	3	3	3	3	3	3	3	1	1	3	3	3	1	1	3	3	3	3	3	1	3	1	3	3	1	1	1	1	3	3	3	3	3	3	3	1	3	3	3	3	3	3	3
GENE.0491_632	1A	224.2	3	3	1	3	1	1	1	1	1	1	1	3	3	1	1	1	3	3	1	1	1	NA	1	3	1	3	1	1	3	3	3	3	1	1	1	1	1	1	1	3	1	1	1	1	1	1	1
Kukri_rep_c96140_621	1A	224.2	3	3	1	3	1	1	1	1	1	1	1	3	3	1	1	1	3	3	1	1	1	1	1	3	1	3	1	1	3	3	3	3	1	1	1	1	1	1	1	3	1	1	1	1	1	1	1
RAC875_c9899_510	1A	225.97	3	3	1	3	1	1	1	1	1	1	1	3	3	1	1	1	3	3	1	1	1	1	1	3	1	3	1	1	3	3	3	3	1	1	1	1	1	1	1	3	1	1	1	1	1	1	1
wsnp_Ex_rep_c66846_65240088	1A	226.35	1	1	3	1	1	1	3	1	1	1	1	1	3	1	1	3	1	1	1	1	3	1	1	1	1	1	1	1	1	1	1	1	1	1	1	1	1	3	1	1	1	3	1	1	1	1	3
IACX219	1A	226.88	1	1	1	1	1	1	1	1	1	1	1	1	3	1	1	3	1	1	1	1	3	1	1	1	1	1	1	1	1	1	1	1	1	1	1	1	1	3	1	1	1	1	1	1	1	1	1
Kukri_c23350_433	1A	226.88	1	1	1	1	1	1	1	1	1	1	1	1	3	1	1	3	1	1	1	1	3	1	1	1	1	1	1	1	1	1	1	1	1	1	1	1	1	3	1	1	1	1	1	1	1	1	1
TA002594.0782	1A	226.88	1	1	3	1	1	1	1	1	1	1	1	1	3	1	1	3	1	1	1	1	3	1	1	1	1	1	1	1	1	1	1	1	1	1	1	1	1	3	1	1	1	3	1	1	1	1	1
Tdurum_contig43203_318	1A	226.88	1	1	1	1	1	1	1	1	1	1	1	1	3	1	1	3	1	1	1	1	3	1	1	1	1	1	1	1	1	1	1	1	1	1	1	1	1	3	1	1	1	1	1	1	1	1	1
Tdurum_contig99671_174	1A	226.88	3	3	3	3	3	3	3	3	3	3	3	3	1	3	3	1	3	3	3	3	1	3	3	3	3	3	3	3	3	3	3	3	3	3	3	3	3	1	3	3	3	3	3	3	3	3	3
IAAV4099	1A	227.89	1	1	1	3	1	1	1	1	1	1	1	3	1	1	1	1	3	1	1	1	1	1	1	3	1	3	1	1	1	1	1	1	1	1	1	1	1	1	1	3	1	1	1	1	1	1	1
Kukri_c20672_360	1A	229.38	NA	1	3	3	1	1	3	3	3	3	3	3	3	3	3	3	3	1	3	3	3	3	3	3	3	3	3	3	1	1	1	1	1	NA	3	3	3	3	3	3	3	3	3	3	3	3	3
Kukri_c35200_895	1A	229.38	1	1	3	3	1	1	3	3	3	3	3	3	3	3	3	3	3	1	3	3	3	3	3	3	3	3	3	3	1	1	1	NA	3	1	3	3	3	3	3	3	3	3	3	3	3	3	3
tplb0059e14_515	1A	229.38	1	1	3	3	1	1	3	3	3	3	3	3	3	3	3	3	3	1	3	3	3	3	3	3	3	3	3	3	1	1	1	1	3	1	3	3	3	3	3	3	3	3	3	3	3	3	3
RFL_Contig2270_2610	1A	230.75	1	1	1	1	1	1	1	1	3	1	1	1	1	1	1	1	1	1	3	3	1	3	3	1	3	1	1	3	1	3	1	1	1	1	1	3	3	1	3	1	3	1	1	3	3	1	1
TA005242.0705	1A	230.75	3	3	3	3	3	3	3	3	3	3	3	3	3	3	3	3	3	3	1	3	3	1	3	3	1	3	3	1	3	3	3	3	3	3	3	3	3	3	1	3	1	3	3	1	3	3	3
tplb0046g22_1351	1A	230.75	3	3	3	3	3	3	3	3	3	3	3	3	3	3	3	3	3	3	1	3	3	1	3	3	3	3	3	1	3	3	3	3	3	3	3	3	3	3	1	3	1	3	3	1	3	3	3
BobWhite_rep_c49207_243	1A	230.92	1	1	3	3	3	1	3	1	1	1	1	3	1	1	1	1	3	1	1	1	3	1	1	3	1	3	1	1	1	1	1	1	3	1	1	1	1	3	1	3	1	3	1	1	1	1	3
BobWhite_rep_c63819_182	1A	230.92	3	3	3	3	3	3	3	3	3	3	3	3	3	3	3	3	3	3	1	3	1	1	3	3	3	3	3	1	3	3	3	3	3	3	3	3	3	3	1	3	1	3	3	1	3	3	3
BS00002216_51	1A	230.92	1	1	1	1	1	1	1	1	1	1	1	1	1	1	1	1	1	1	3	1	3	3	1	1	1	1	1	3	1	1	1	1	1	1	1	1	1	1	3	1	3	1	1	3	1	1	1
BS00040968_51	1A	230.92	1	1	1	1	1	1	1	1	1	1	1	1	1	1	1	1	1	1	3	1	3	3	1	1	3	1	1	3	1	1	1	1	1	1	1	1	1	1	3	1	3	1	1	3	1	1	1
BS00063068_51	1A	230.92	3	3	1	1	1	3	1	3	3	3	3	1	3	3	3	3	1	3	3	3	1	3	3	1	3	1	3	3	3	3	3	3	1	3	3	3	3	1	3	1	3	1	3	3	3	3	1
BS00067420_51	1A	230.92	3	3	3	1	3	3	3	3	3	3	3	1	3	3	3	3	1	3	1	3	1	1	3	1	1	1	3	1	3	3	3	3	3	3	3	3	3	3	1	1	1	3	3	1	3	3	3
BS00087601_51	1A	230.92	3	3	3	1	3	3	3	3	3	1	3	1	3	1	3	3	1	3	1	3	1	1	3	1	1	1	1	1	3	3	3	3	3	3	3	3	3	3	1	1	1	3	3	1	3	3	3
IACX18883	1A	230.92	1	1	1	1	1	1	1	3	1	3	1	1	3	3	1	1	1	1	1	1	1	1	1	1	1	1	3	1	1	1	1	1	1	1	1	1	1	3	1	1	1	1	1	1	1	1	1
IACX4386	1A	230.92	1	1	1	1	1	1	1	1	1	1	1	1	1	1	1	1	1	1	3	1	3	3	1	1	1	1	1	3	1	1	1	1	1	1	1	1	1	1	3	1	3	1	1	3	1	1	1
Kukri_c19389_97	1A	230.92	3	3	3	3	1	1	1	1	3	1	1	3	3	1	1	3	3	3	3	3	3	3	3	3	1	3	1	3	3	3	3	3	1	1	1	3	3	3	3	3	3	3	1	3	3	1	1
Ra_c11023_679	1A	230.92	3	3	1	3	1	1	1	1	3	1	1	3	1	1	1	3	3	3	3	3	3	3	3	3	1	3	1	3	3	3	3	3	1	1	1	3	3	3	3	3	3	1	1	3	3	1	1
RAC875_c105730_397	1A	230.92	1	1	1	1	3	3	3	3	1	3	3	NA	1	3	3	1	1	1	1	1	1	1	1	1	3	1	3	1	1	1	1	1	3	3	3	1	1	1	1	1	1	1	3	1	1	3	3
RAC875_c18539_1159	1A	230.92	3	3	1	3	1	1	1	1	3	1	1	3	1	1	1	3	3	3	3	3	3	3	3	3	1	3	1	3	3	3	3	3	1	1	1	3	3	3	3	3	3	1	1	3	3	1	1
Tdurum_contig31304_527	1A	230.92	3	3	3	3	3	3	3	3	3	1	3	3	3	1	3	3	3	3	1	3	1	1	3	3	3	3	1	1	3	3	3	3	3	3	3	3	3	3	1	3	1	3	3	1	3	3	3
wsnp_Ex_c3906_7086294	1A	230.92	3	3	3	3	1	1	1	1	3	1	1	3	1	1	1	3	3	3	3	3	3	3	3	3	1	3	1	3	3	3	3	3	1	1	1	3	3	3	3	3	3	3	1	3	3	1	1
wsnp_Ex_c4310_7770452	1A	230.92	1	1	1	1	1	1	1	3	1	3	1	1	3	3	1	1	1	1	1	1	1	1	1	1	1	1	3	1	1	1	1	1	1	1	1	1	1	3	1	1	1	1	1	1	1	1	1
wsnp_Ex_rep_c101414_86780996	1A	230.92	3	3	3	1	3	3	3	3	1	3	3	1	1	3	3	1	1	3	1	1	1	1	1	1	3	1	3	1	3	3	3	3	3	3	3	1	1	1	1	1	1	3	3	1	1	3	3
wsnp_Ex_rep_c66562_64849366	1A	230.92	1	1	1	1	3	3	3	3	1	3	3	NA	1	3	3	1	1	1	1	1	1	NA	1	1	3	1	3	1	1	1	1	1	3	3	3	1	1	1	1	1	1	1	3	1	1	3	3
wsnp_Ra_c32175_41221223	1A	231.15	1	1	1	1	1	1	1	3	1	3	1	1	3	3	1	1	1	1	1	1	1	1	1	1	1	1	3	1	1	1	1	1	1	1	1	1	1	3	1	1	1	1	1	1	1	1	1
Excalibur_c59894_97	1A	232.27	1	1	1	1	1	1	1	3	1	3	1	1	3	3	1	1	1	1	1	1	1	1	1	1	1	1	3	1	1	1	1	1	1	1	1	1	1	3	1	1	1	1	1	1	1	1	1
Ex_c28144_1843	1A	234.04	3	3	1	3	1	3	1	3	3	3	1	3	3	3	1	3	3	3	3	3	3	3	3	3	3	3	3	3	3	3	3	3	3	3	1	3	3	3	3	3	3	1	1	3	3	1	1
RAC875_c15426_1713	1A	234.04	3	3	1	3	1	3	1	3	3	3	1	3	3	3	1	3	3	3	3	3	3	3	3	3	3	3	3	3	3	3	3	3	3	3	1	3	3	3	3	3	3	1	1	3	3	1	1
BS00033469_51	1A	235.11	3	3	1	1	1	3	1	1	3	1	3	1	1	1	3	3	1	3	3	3	1	3	3	1	3	1	1	3	3	3	3	3	1	3	3	3	3	1	3	1	3	1	3	3	3	3	1
Ex_c8514_1342	1A	235.11	1	1	3	3	3	1	3	1	1	1	1	3	1	1	1	1	3	1	3	1	3	3	1	3	3	3	1	3	1	1	1	1	3	1	1	1	1	3	3	3	3	3	1	3	1	1	3
IAAV213	1A	235.11	3	3	1	1	1	3	1	3	3	3	3	1	3	3	3	3	1	3	3	3	1	3	3	1	3	1	3	3	3	3	3	3	1	3	3	3	3	1	3	1	3	1	3	3	3	3	1
IACX3496	1A	235.11	3	3	1	1	1	3	1	1	3	1	1	NA	1	1	1	3	1	3	1	3	1	1	3	1	1	1	1	1	3	3	3	3	1	3	1	3	3	1	1	1	1	1	1	1	3	1	1
Kukri_c10453_875	1A	235.11	1	1	3	3	3	1	3	3	1	3	1	3	3	3	1	1	3	1	3	1	3	3	1	3	3	3	3	3	1	1	1	1	3	1	1	1	1	3	3	3	3	3	1	3	1	1	3
Ra_c58315_265	1A	235.11	1	1	3	3	3	1	3	3	1	3	1	3	3	3	1	1	3	1	1	1	3	1	1	3	1	3	3	1	1	1	1	1	3	1	1	1	1	3	1	3	1	3	1	1	1	1	3
RAC875_c41275_131	1A	235.11	3	3	1	1	1	3	1	1	3	1	3	1	1	1	3	3	1	3	3	3	1	3	3	1	3	1	1	3	3	3	3	3	1	3	3	3	3	1	3	1	3	1	3	3	3	3	1
wsnp_Ex_c25734_34995416	1A	235.11	1	1	3	3	3	1	3	1	1	1	1	3	1	1	1	1	3	1	1	1	3	NA	1	3	1	3	1	1	1	1	1	1	3	1	1	1	1	3	1	3	1	3	1	1	1	1	3
wsnp_Ex_c56097_58352130	1A	235.11	1	1	3	3	3	1	3	3	1	3	1	3	3	3	1	1	3	1	1	1	3	1	1	3	1	3	3	1	1	1	1	1	3	1	1	1	1	3	1	3	1	3	1	1	1	1	3
wsnp_Ku_c557_1166684	1A	235.11	1	1	3	3	3	1	3	1	1	1	1	3	1	1	1	1	3	1	1	1	3	1	1	3	1	3	1	1	1	1	1	1	3	1	1	1	1	3	1	3	1	3	1	1	1	1	3
Ra_c6038_588	1A	236.56	3	3	1	1	1	3	1	3	3	3	3	1	3	3	3	3	1	3	3	3	1	3	3	1	3	1	3	3	3	3	3	3	1	3	3	3	3	1	3	1	3	1	3	3	3	3	1
wsnp_Ex_rep_c73818_71733737	1A	236.84	1	1	3	3	3	1	3	1	1	1	1	3	1	1	1	1	3	1	1	1	3	1	1	3	1	3	1	1	1	1	1	1	3	1	1	1	1	3	1	3	1	3	1	1	1	1	3
GENE.0112_64	1A	237.26	3	3	1	3	1	3	1	1	3	1	3	3	1	1	3	3	3	3	1	3	3	1	3	3	1	3	1	1	3	3	3	3	1	3	3	3	3	1	1	3	1	1	3	1	3	3	1
Kukri_c3582_87	1A	237.26	1	1	3	1	3	1	3	3	1	3	1	1	3	3	1	1	1	1	3	1	1	3	1	1	3	1	3	3	1	1	1	1	3	1	1	1	1	3	3	1	3	3	1	3	1	1	3
RAC875_c25507_551	1A	237.26	1	1	3	1	3	1	3	1	1	1	1	1	1	1	1	1	1	1	1	1	3	1	1	1	1	1	1	1	1	1	1	1	3	1	1	1	1	3	1	1	1	3	1	1	1	1	3
BS00012283_51	1A	240.18	3	3	1	1	1	3	1	1	3	1	3	1	1	1	3	3	1	3	1	3	1	1	3	1	1	1	1	1	3	3	3	3	1	3	3	3	3	1	1	1	1	1	3	1	3	3	1
BS00023101_51	1A	240.18	3	3	1	1	1	3	1	1	3	1	3	1	1	1	3	3	1	3	1	3	1	1	3	1	1	1	1	1	3	3	3	3	1	3	3	3	3	1	1	1	1	1	3	1	3	3	1
BS00023126_51	1A	240.18	1	1	1	1	1	1	1	1	1	1	1	1	1	1	1	1	1	1	1	1	1	1	1	1	1	1	1	1	1	1	1	1	3	1	1	1	1	3	1	1	1	1	1	1	1	1	1
BS00067421_51	1A	240.18	3	3	1	1	1	3	1	1	3	1	3	1	1	1	3	3	1	3	1	3	1	1	3	1	1	1	1	1	3	3	3	3	1	3	3	3	3	1	1	1	1	1	3	1	3	3	1
BS00087600_51	1A	240.18	1	1	1	1	1	1	1	3	1	1	1	1	3	1	1	1	1	1	1	1	1	1	1	1	1	1	1	1	1	1	1	1	3	1	1	1	1	3	1	1	1	1	1	1	1	1	1
CAP11_c1972_285	1A	240.18	3	3	1	3	1	3	1	1	3	1	3	3	1	1	3	3	3	3	3	3	3	3	3	3	3	3	1	3	3	3	3	3	1	3	3	3	3	1	3	3	3	1	3	3	3	3	1
Excalibur_c10167_1028	1A	240.18	1	1	3	1	3	1	3	1	1	1	1	NA	1	1	1	1	1	1	1	1	3	1	1	1	1	1	1	1	1	1	1	1	3	1	1	1	1	3	1	1	1	3	1	1	1	1	3
Excalibur_c30591_637	1A	240.18	3	3	1	3	1	3	1	1	3	1	3	3	1	1	3	3	3	3	3	3	3	3	3	3	3	3	1	3	3	3	3	3	1	3	3	3	3	1	3	3	3	1	3	3	3	3	1
Excalibur_c7033_159	1A	240.18	3	3	1	1	1	3	1	1	3	1	3	1	1	1	3	3	1	3	1	3	1	1	3	1	1	1	1	1	3	3	3	3	1	3	3	3	3	1	1	1	1	1	3	1	3	3	1
Excalibur_rep_c112145_271	1A	240.18	3	3	3	1	3	3	3	1	3	1	3	1	1	1	3	3	1	3	3	3	3	3	3	1	3	1	1	3	3	3	3	3	1	3	3	3	3	1	3	1	3	3	3	3	3	3	3
IAAV1225	1A	240.18	1	1	3	1	3	1	3	1	1	1	1	1	1	NA	1	1	1	1	1	1	3	1	1	1	1	1	1	1	1	1	1	1	3	1	1	1	1	3	1	1	1	3	1	1	1	1	3
IACX11070	1A	240.18	3	3	1	1	1	3	1	1	3	1	3	1	1	1	3	3	1	3	1	3	1	1	3	1	1	1	1	1	3	3	3	3	1	3	3	3	3	1	1	1	1	1	3	1	3	3	1
IACX4378	1A	240.18	3	3	1	3	1	3	1	1	3	1	3	3	1	1	3	3	3	3	3	3	3	3	3	3	3	3	1	3	3	3	3	3	1	3	3	3	3	1	3	3	3	1	3	3	3	3	1
IACX662	1A	240.18	1	1	3	3	3	1	3	3	1	3	1	3	3	3	1	1	3	1	3	1	3	3	1	3	3	3	3	3	1	1	1	1	3	1	1	1	1	3	3	3	3	3	1	3	1	1	3
Kukri_c10239_2186	1A	240.18	1	1	3	1	3	1	3	1	1	1	1	1	1	1	1	1	1	1	3	1	3	3	1	1	3	1	1	3	1	1	1	1	3	1	1	1	1	3	3	1	3	3	1	3	1	1	3
RAC875_c94534_75	1A	240.18	3	3	1	1	1	3	1	1	3	1	3	1	1	1	3	3	1	3	1	3	1	1	3	1	3	1	1	1	3	3	3	3	1	3	3	3	3	1	1	1	1	1	3	1	3	3	1
RFL_Contig3203_1971	1A	240.18	1	1	3	3	3	1	3	3	1	1	1	3	3	1	1	1	3	1	1	1	1	1	1	3	1	3	1	1	1	1	1	1	3	1	1	1	1	3	1	3	1	3	1	1	1	1	3
Tdurum_contig28296_243	1A	240.18	1	1	3	1	3	1	3	3	1	3	1	1	3	3	1	1	1	1	1	1	1	1	1	1	1	1	3	1	1	1	1	1	3	1	1	1	1	3	1	1	1	3	1	1	1	1	3
wsnp_BE495786A_Ta_2_1	1A	240.18	1	1	3	3	3	1	3	3	1	3	1	3	3	3	1	1	3	1	3	1	3	3	1	3	3	3	3	3	1	1	1	1	3	1	1	1	1	3	3	3	3	3	1	3	1	1	3
wsnp_Ex_c5216_9235964	1A	240.18	3	3	1	1	1	3	1	1	3	1	3	1	1	1	3	3	1	3	1	3	1	1	3	1	1	1	1	1	3	3	3	3	1	3	3	3	3	1	1	1	1	1	3	1	3	3	1
wsnp_Ku_c2815_5317230	1A	240.18	3	3	1	3	1	3	1	3	3	3	3	3	3	3	3	3	3	3	3	3	1	3	3	3	3	3	3	3	3	3	3	3	1	3	3	3	3	1	3	3	3	1	3	3	3	3	1
wsnp_Ra_c7818_13376644	1A	240.18	3	3	1	3	1	3	1	3	3	3	3	3	3	3	3	3	3	3	3	3	1	3	3	3	3	3	3	3	3	3	3	3	1	3	3	3	3	1	3	3	3	1	3	3	3	3	1
IAAV3049	1A	241.48	1	1	3	3	3	1	3	3	1	1	1	3	3	1	1	1	3	1	1	1	3	1	1	3	1	3	1	1	1	1	1	1	3	1	1	1	1	3	1	3	1	3	1	1	1	1	3
wsnp_Ex_c27940_37101775	1A	241.48	3	3	1	1	1	3	1	1	3	3	3	1	1	3	3	3	1	3	3	3	1	3	3	1	3	1	3	3	3	3	3	3	1	3	3	3	3	1	3	1	3	1	3	3	3	3	1
wsnp_Ra_c12148_19539667	1A	241.48	1	1	3	3	3	1	3	3	1	1	1	3	3	1	1	1	3	1	1	1	3	1	1	3	1	3	1	1	1	1	1	1	3	1	1	1	1	3	1	3	1	3	1	1	1	1	3
BobWhite_c18881_338	1A	241.88	3	3	1	1	1	3	1	3	3	3	3	NA	3	3	3	3	1	3	3	3	1	3	3	1	3	1	3	3	3	3	3	3	1	3	3	3	3	1	3	1	3	1	3	3	3	3	NA
BobWhite_c5356_1272	1A	241.88	3	3	1	1	1	3	1	3	3	3	3	1	3	3	3	3	1	3	3	3	3	3	3	1	3	1	3	3	3	3	3	3	1	3	3	3	3	1	3	1	3	1	3	3	3	3	1
BobWhite_rep_c63278_349	1A	241.88	1	1	3	3	3	1	3	1	1	1	1	3	1	1	1	1	3	1	1	1	1	1	1	3	1	3	1	1	1	1	1	1	3	1	1	1	1	3	1	3	1	3	1	1	1	1	3
Ex_c5192_943	1A	241.88	1	1	3	3	3	1	3	3	1	3	1	3	3	3	1	1	3	1	1	1	1	1	1	3	1	3	3	1	1	1	1	1	3	1	1	1	1	3	1	3	1	3	1	1	1	1	3
Excalibur_c32167_59	1A	241.88	1	1	3	3	3	1	3	1	1	3	1	3	1	3	1	1	3	1	3	1	3	3	1	3	1	3	3	3	1	1	1	1	3	1	1	1	1	3	3	3	3	3	1	3	1	1	3
Excalibur_c49421_443	1A	241.88	3	3	1	1	1	3	1	3	3	3	3	1	3	3	3	3	1	3	3	3	3	3	3	1	3	1	3	3	3	3	3	3	1	3	3	3	3	1	3	1	3	1	3	3	3	3	1
GENE.0410_71	1A	241.88	3	3	1	1	3	3	1	1	3	1	3	1	1	1	3	3	1	3	3	3	1	3	3	1	3	1	1	3	3	3	3	3	1	3	3	3	3	1	3	1	3	1	3	3	3	3	1
IACX11338	1A	241.88	1	1	3	3	1	1	3	3	1	3	1	3	3	3	1	1	3	1	1	1	3	1	1	3	1	3	3	1	1	1	1	1	3	1	1	1	1	3	1	3	1	3	1	1	1	1	3
RAC875_c31276_1128	1A	241.88	1	1	3	3	3	1	3	3	1	1	1	3	3	1	1	1	3	1	1	1	1	1	1	3	1	3	1	1	1	1	1	1	3	1	1	1	1	3	1	3	1	3	1	1	1	1	3
RAC875_c38916_66	1A	241.88	1	1	3	3	3	1	3	1	1	3	1	3	1	3	1	1	3	1	1	1	3	1	1	3	1	3	3	1	1	1	1	1	3	1	1	1	1	3	1	3	1	3	1	1	1	1	3
RAC875_c43643_176	1A	241.88	1	1	1	1	1	1	1	1	1	1	1	1	1	1	1	1	1	1	3	1	3	3	1	1	1	1	1	3	1	1	1	1	1	1	1	1	1	1	3	1	3	1	1	3	1	1	1
RFL_Contig4231_575	1A	241.88	1	1	3	3	3	1	3	1	1	3	1	3	1	3	1	1	3	1	3	1	3	3	1	3	1	3	3	3	1	1	1	1	3	1	1	1	1	3	3	3	3	3	1	3	1	1	3
wsnp_Ex_c12165_19452361	1A	241.88	3	3	1	1	1	3	1	3	3	3	3	1	3	3	3	3	1	3	3	3	3	3	3	1	3	1	3	3	3	3	3	3	1	3	3	3	3	1	3	1	3	1	3	3	3	3	1
wsnp_Ex_c34344_42677360	1A	241.88	3	3	1	1	1	3	1	3	3	3	3	1	3	3	3	3	1	3	3	3	3	3	3	1	3	1	3	3	3	3	3	3	1	3	3	3	3	1	3	1	3	1	3	3	3	3	1
wsnp_Ex_c5192_9203100	1A	241.88	1	1	3	3	3	1	3	3	1	3	1	3	3	3	1	1	3	1	1	1	1	1	1	3	1	3	3	1	1	1	1	1	3	1	1	1	1	3	1	3	1	3	1	1	1	1	3
wsnp_Ex_c5192_9203682	1A	241.88	3	3	1	1	1	3	1	1	3	1	3	1	1	1	3	3	1	3	3	3	3	3	3	1	3	1	1	3	3	3	3	3	1	3	3	3	3	1	3	1	3	1	3	3	3	3	1
wsnp_Ex_c8588_14419007	1A	241.88	3	3	1	1	1	3	1	3	3	1	3	1	3	1	3	3	1	3	1	3	1	1	3	1	3	1	1	1	3	3	3	3	1	3	3	3	3	1	1	1	1	1	3	1	3	3	1
wsnp_Ku_c23926_33870364	1A	241.88	1	1	3	3	3	1	3	1	1	3	1	3	1	3	1	1	3	1	3	1	3	3	1	3	1	3	3	3	1	1	1	1	3	1	1	1	1	3	3	3	3	3	1	3	1	1	3
wsnp_Ku_c24239_34199356	1A	241.88	1	1	3	3	3	1	3	3	1	3	1	3	3	3	1	1	3	1	1	1	1	1	1	3	1	3	3	1	1	1	1	1	3	1	1	1	1	3	1	3	1	3	1	1	1	1	3
wsnp_Ra_c37745_45806931	1A	241.88	3	3	1	1	1	3	1	3	3	3	3	1	3	3	3	3	1	3	3	3	3	3	3	1	3	1	3	3	3	3	3	3	1	3	3	3	3	1	3	1	3	1	3	3	3	3	1
IAAV5406	1A	241.97	1	1	3	3	3	1	3	1	1	3	1	3	1	3	1	1	3	1	1	1	3	1	1	3	1	3	3	1	1	1	1	1	3	1	1	1	1	3	1	3	1	3	1	1	1	1	3
Ku_c8351_2029	1A	241.97	1	1	3	3	3	1	3	1	1	3	1	3	1	3	1	1	3	1	1	1	3	1	1	3	1	3	3	1	1	1	1	1	3	1	1	1	1	3	1	3	1	3	1	1	1	1	3
Kukri_c52952_315	1A	241.97	1	1	3	3	3	1	3	1	1	3	1	3	1	3	1	1	3	1	1	1	3	1	1	3	1	3	3	1	1	1	1	1	3	1	1	1	1	3	1	3	1	3	1	1	1	1	3
wsnp_Ex_c34344_42676379	1A	241.97	1	1	3	3	3	1	3	1	1	3	1	3	1	3	1	1	3	1	1	1	3	1	1	3	1	3	3	1	1	1	1	1	3	1	1	1	1	3	1	3	1	3	1	1	1	1	3
wsnp_Ex_c42282_48900922	1A	241.97	1	1	3	3	3	1	3	1	1	3	1	3	1	3	1	1	3	1	1	1	3	NA	1	3	1	3	3	1	1	1	1	1	3	1	1	1	1	3	1	3	1	3	1	1	1	1	3
wsnp_Ex_rep_c66628_64934660	1A	241.97	1	1	3	3	3	1	3	1	1	3	1	3	1	3	1	1	3	1	1	1	3	1	1	3	1	3	3	1	1	1	1	1	3	1	1	1	1	3	1	3	1	3	1	1	1	1	3
wsnp_Ku_c39878_48218985	1A	241.97	1	1	3	3	3	1	3	1	1	3	1	3	1	3	1	1	3	1	1	1	3	1	1	3	1	3	3	1	1	1	1	1	3	1	1	1	1	3	1	3	1	3	1	1	1	1	3
wsnp_Ra_c16080_24638622	1A	241.97	3	3	1	1	1	3	1	3	3	1	3	1	3	NA	3	3	1	3	3	3	1	3	3	1	3	1	1	3	3	3	3	3	1	3	3	3	3	1	3	1	3	1	3	3	3	3	1
RAC875_c16080_777	1A	242.66	3	3	1	1	1	3	1	3	3	3	3	NA	3	3	3	3	1	3	3	3	3	3	3	1	3	1	3	3	3	3	3	3	1	3	3	3	3	1	3	1	3	1	3	3	3	3	1
BobWhite_c12568_900	1A	244.52	1	1	3	1	1	1	3	3	3	1	3	1	3	1	3	1	1	1	1	3	3	1	3	1	3	1	1	1	1	3	1	1	3	1	3	3	3	3	1	1	1	3	3	1	3	3	3
Ex_c105443_895	1A	244.52	3	3	1	1	3	3	1	1	1	3	1	1	1	3	1	3	1	3	3	1	1	3	1	1	1	1	3	3	3	1	3	3	1	3	1	1	1	1	3	1	3	1	1	3	1	1	1
Excalibur_c34697_831	1A	244.52	1	1	3	1	1	1	3	3	3	1	3	1	3	1	3	1	1	1	1	3	3	1	3	1	3	1	1	1	1	3	1	1	3	1	3	3	3	3	1	1	1	3	3	1	3	3	3
wsnp_Ex_c21193_30320134	1A	244.52	1	1	3	1	1	1	3	3	3	1	3	1	3	1	3	1	1	1	1	3	3	1	3	1	3	1	1	1	1	3	1	1	3	1	3	3	3	3	1	1	1	3	3	1	3	3	3
GENE.0004_635	1A	245.35	1	1	3	3	3	1	3	3	1	1	1	3	3	NA	1	1	3	1	3	1	3	3	1	3	1	3	1	3	1	1	1	NA	3	1	1	1	1	3	3	3	3	3	1	3	1	1	3
Ku_c1571_1457	1A	245.35	3	3	1	3	1	3	1	3	3	3	3	3	3	3	3	3	3	3	3	3	3	3	3	3	3	3	3	3	3	3	3	3	3	3	3	3	3	3	3	3	3	1	3	3	3	3	1
Kukri_c25215_124	1A	245.35	1	1	3	3	1	1	3	3	3	1	3	3	3	1	3	1	3	1	1	3	3	1	3	3	3	3	1	1	1	3	1	1	3	1	3	3	3	3	1	3	1	3	3	1	3	3	3
RAC875_c19579_377	1A	245.35	3	3	3	3	3	3	3	1	1	3	1	3	1	3	1	3	3	3	3	1	1	3	1	3	1	3	3	3	3	1	3	3	1	3	1	1	1	1	3	3	3	3	1	3	1	1	3
wsnp_Ex_rep_c105443_89868548	1A	245.35	1	1	1	1	1	1	1	3	3	1	3	1	3	1	3	1	1	1	1	3	3	1	3	1	3	1	1	1	1	3	1	1	3	1	3	3	3	3	1	1	1	1	3	1	3	3	1
Excalibur_c35821_61	1A	245.58	3	3	3	3	3	3	3	1	1	3	1	3	1	3	1	3	3	3	3	1	1	3	1	3	1	3	3	3	3	1	3	3	3	3	1	1	1	3	3	3	3	3	1	3	1	1	3
Excalibur_rep_c82767_175	1A	245.58	3	3	3	3	3	3	3	1	1	3	1	3	1	3	1	3	3	3	3	1	1	3	1	3	1	3	3	3	3	1	3	3	3	3	1	1	1	3	3	3	3	3	1	3	1	1	3
Ku_c16913_363	1A	245.58	3	3	3	3	3	3	3	1	1	3	1	3	1	3	1	3	3	3	3	1	1	3	1	3	1	3	3	3	3	1	3	3	3	3	1	1	1	3	3	3	3	3	1	3	1	1	3
RAC875_c2734_135	1A	245.58	3	3	1	3	1	3	1	1	3	1	3	3	1	1	3	3	3	3	3	3	3	3	3	3	3	3	1	3	3	3	3	3	3	3	3	3	3	3	3	3	3	1	3	3	3	3	1
RAC875_c53185_802	1A	245.58	1	1	3	1	3	1	3	3	1	3	1	1	3	3	1	1	1	1	1	1	1	1	1	1	1	1	3	1	1	1	1	1	1	1	1	1	1	1	1	1	1	3	1	1	1	1	3
wsnp_Ex_rep_c70358_69302556	1A	245.58	3	3	1	3	1	3	1	3	3	3	3	3	3	3	3	3	3	3	3	3	3	3	3	3	3	3	3	3	3	3	3	3	3	3	3	3	3	3	3	3	3	1	3	3	3	3	1
wsnp_Ku_c16913_25885872	1A	245.58	3	3	3	3	3	3	3	1	1	3	1	3	1	3	1	3	3	3	3	1	1	3	1	3	1	3	3	3	3	1	3	3	3	3	1	1	1	3	3	3	3	3	1	3	1	1	3
BS00022733_51	1A	245.76	3	3	3	3	3	3	3	3	3	3	3	3	3	3	3	3	3	3	1	3	3	3	3	3	3	3	3	3	3	3	3	3	3	3	3	3	3	3	1	3	1	3	3	1	3	3	3
Ex_c4051_1826	1A	245.76	1	1	1	1	1	1	1	3	1	1	1	1	3	NA	1	1	1	1	1	1	3	1	1	1	1	1	1	1	1	1	1	1	3	1	1	1	1	3	1	1	1	1	1	1	1	1	1
IAAV8429	1A	245.76	3	3	3	3	3	3	3	1	3	3	3	3	1	3	3	3	3	3	3	3	1	3	3	3	3	3	3	3	3	3	3	3	1	3	3	3	3	1	3	3	3	3	3	3	3	3	3
Kukri_c16913_422	1A	245.76	3	3	3	3	3	3	3	1	1	3	1	3	1	3	1	3	3	3	3	1	1	3	1	3	1	3	3	3	3	1	3	3	3	3	1	1	1	3	3	3	3	3	1	3	1	1	3
Ra_c7552_772	1A	245.76	1	1	1	1	1	1	1	3	1	1	1	1	3	1	1	1	1	1	1	1	3	1	1	1	1	1	1	1	1	1	1	1	3	1	1	1	1	3	1	1	1	1	1	1	1	1	1
Ra_c9876_373	1A	245.76	3	3	3	3	3	3	3	1	3	3	3	3	1	NA	3	3	3	3	3	3	1	3	3	3	3	3	3	3	3	3	3	3	1	3	3	3	3	1	3	3	3	3	3	3	3	3	3
RAC875_c31419_80	1A	245.76	3	3	3	3	3	3	3	3	3	3	3	3	3	3	3	3	3	3	1	3	3	1	3	3	3	3	3	1	3	3	3	3	3	3	3	3	3	3	1	3	1	3	3	1	3	3	3
wsnp_Ex_c19294_28225846	1A	245.76	1	1	1	1	1	1	1	3	3	1	3	1	3	1	3	1	1	1	1	3	3	1	3	1	3	1	1	1	1	3	1	1	1	1	3	3	3	1	1	1	1	1	3	1	3	3	1
wsnp_Ex_c35821_43892960	1A	245.76	3	3	3	3	3	3	3	1	1	3	1	3	1	3	1	3	3	3	3	1	1	3	1	3	1	3	3	3	3	1	3	3	3	3	1	1	1	3	3	3	3	3	1	3	1	1	3
wsnp_Ra_c4664_8410628	1A	245.76	3	3	3	3	3	3	3	1	1	3	1	3	1	3	1	3	3	3	3	1	1	3	1	3	1	3	3	3	3	1	3	3	3	3	1	1	1	3	3	3	3	3	1	3	1	1	3
BS00089894_51	1A	248.7	3	3	3	3	3	3	3	3	3	3	3	3	3	3	3	3	3	3	3	3	3	1	3	3	3	3	3	3	3	3	3	3	3	3	3	3	3	1	3	3	3	3	3	3	3	3	3
Ra_c105707_788	1A	248.7	1	1	1	1	1	1	1	1	1	1	1	1	1	1	1	1	1	1	1	1	1	3	1	1	1	1	1	1	1	1	1	1	1	1	1	1	1	3	1	1	1	1	1	1	1	1	1
wsnp_Ex_c55986_58282517	1A	248.7	1	1	1	1	1	1	1	1	1	1	1	1	1	1	1	1	1	1	1	1	1	3	1	1	1	1	1	1	1	1	1	1	1	1	1	1	1	3	1	1	1	1	1	1	1	1	1
IAAV5535	1A	249.48	3	3	1	1	1	3	1	1	1	1	1	NA	1	1	1	3	1	3	3	1	1	1	1	1	1	1	1	3	3	1	3	3	1	3	1	1	1	1	3	1	3	1	1	3	1	1	1
IACX3047	1A	249.48	3	3	1	1	1	3	1	1	1	1	1	1	1	1	1	3	1	3	3	1	1	1	1	1	1	1	1	3	3	1	3	3	1	3	1	1	1	1	3	1	3	1	1	3	1	1	1
Tdurum_contig32437_257	1A	251.69	1	1	3	1	1	1	3	3	1	1	1	1	3	3	1	1	1	1	1	1	3	3	1	1	1	1	3	1	1	1	1	NA	3	1	1	1	1	3	1	1	1	3	1	1	1	1	3
wsnp_Ex_rep_c109742_92411838	1A	251.78	3	3	1	3	3	3	1	1	3	3	3	3	1	1	3	3	3	3	3	3	1	3	3	3	3	3	1	3	3	3	3	3	1	3	3	3	3	1	3	3	3	1	3	3	3	3	1
wsnp_Ku_c21316_31053745	1A	253.11	1	3	3	3	1	3	3	3	1	1	1	1	3	3	1	3	1	1	1	1	3	1	1	1	1	1	3	1	1	1	1	1	3	3	1	1	1	3	1	1	1	3	1	1	1	1	3
wsnp_Ku_c21316_31053776	1A	253.11	3	1	1	1	3	1	1	1	3	3	3	3	1	1	3	1	3	3	3	3	1	3	3	3	3	3	1	3	3	3	3	3	1	1	3	3	3	1	3	3	3	1	3	3	3	3	1
wsnp_Ra_c33025_41968284	1A	255.26	3	3	1	3	3	3	1	3	1	3	1	1	3	3	1	3	3	3	3	1	3	3	1	1	1	3	3	3	3	1	3	3	3	3	1	1	1	1	3	3	NA	1	1	3	1	1	1
BobWhite_c29908_113	1A	256	1	3	3	3	1	3	3	1	3	1	3	3	1	3	3	3	1	1	1	3	1	3	3	3	3	1	3	1	1	3	1	1	3	3	3	3	3	1	1	1	3	3	3	1	3	3	3
BS00094553_51	1A	256	1	1	1	1	3	1	1	1	1	1	1	1	1	1	1	1	1	1	1	1	1	1	1	1	1	3	1	1	1	1	1	1	1	1	1	1	1	1	1	3	1	1	1	1	1	1	1
CAP12_c1906_217	1A	256	1	3	3	3	1	3	3	3	3	1	3	3	3	3	3	3	3	1	1	3	3	3	3	3	3	1	3	1	1	3	1	NA	3	3	3	3	3	3	1	1	1	3	3	1	3	3	3
Ex_c2848_957	1A	256	1	1	1	1	1	1	1	3	3	1	1	1	3	1	1	1	3	1	1	1	3	1	1	1	1	1	3	1	1	3	1	1	3	1	1	1	1	3	1	1	1	1	1	1	1	1	1
IAAV8804	1A	256	1	3	3	3	1	3	3	1	3	1	3	3	1	3	3	3	1	1	1	3	1	3	3	3	3	1	3	1	1	3	1	1	3	3	3	3	3	1	1	1	3	3	3	1	3	3	3
IACX5793	1A	256	3	1	1	1	3	1	1	3	1	3	1	1	3	1	1	1	3	3	3	1	3	1	1	1	1	3	1	3	3	1	3	3	1	1	1	1	1	3	3	3	1	1	1	3	1	1	1
IACX5960	1A	256	3	1	1	1	3	1	1	3	1	3	1	1	3	1	1	1	3	3	3	1	3	1	1	1	1	3	1	3	3	1	3	3	1	1	1	1	1	3	3	3	1	1	1	3	1	1	1
Kukri_c30322_414	1A	256	1	3	3	3	1	3	3	3	3	1	3	3	3	3	3	3	3	1	1	3	3	3	3	3	3	1	3	1	1	3	1	1	3	3	3	3	3	3	1	1	1	3	3	1	3	3	3
RAC875_c29540_391	1A	256	3	3	3	3	3	3	3	3	1	3	3	3	3	3	3	3	3	3	3	3	3	3	3	3	3	3	3	3	3	1	3	3	3	3	3	3	3	1	3	3	3	3	3	3	3	3	3
RAC875_rep_c112044_340	1A	256	3	1	1	1	3	1	1	1	1	3	1	1	1	1	1	1	1	3	3	1	1	1	1	1	1	3	1	3	3	1	3	3	1	1	1	1	1	1	3	3	3	1	1	3	1	1	1
wsnp_BE445113A_Ta_2_1	1A	256	3	1	1	1	1	1	1	3	1	3	1	1	3	3	1	1	3	3	3	1	3	1	1	1	1	1	3	3	3	1	3	3	3	1	1	1	1	3	3	1	1	1	1	3	1	1	1
wsnp_BE445113A_Ta_2_2	1A	256	3	1	1	1	1	1	1	3	1	3	1	1	3	3	1	1	3	3	3	1	3	1	1	1	1	1	3	3	3	1	3	3	3	1	1	1	1	3	3	1	1	1	1	3	1	1	1
wsnp_Ra_c11877_19161832	1A	256	3	1	1	1	1	1	1	3	1	3	1	1	3	3	1	1	3	3	3	1	3	1	1	1	1	1	3	3	3	1	3	3	3	1	1	1	1	1	3	1	1	1	1	3	1	1	1
wsnp_Ra_c3270_6136110	1A	256	3	1	1	1	3	1	1	3	1	3	1	1	3	1	1	1	3	3	3	1	3	1	1	1	1	3	1	3	3	1	3	3	1	1	1	1	1	3	3	3	1	1	1	3	1	1	1
wsnp_Ra_c3270_6136601	1A	256	1	3	3	3	1	3	3	1	3	1	3	3	1	3	3	3	1	1	1	3	1	3	3	3	3	1	3	1	1	3	1	1	3	3	3	3	3	1	1	1	3	3	3	1	3	3	3
Kukri_c13107_100	1A	257.6	1	1	1	1	3	1	1	1	1	1	3	1	1	1	3	1	1	1	1	3	1	1	3	3	3	3	3	1	1	1	1	1	3	1	3	3	3	1	1	3	3	1	3	1	3	3	1
wsnp_Ku_c15214_23756800	1A	258	1	1	3	1	1	1	3	1	1	1	3	3	1	3	3	1	3	1	1	3	1	1	3	3	3	1	3	1	1	1	1	1	3	1	3	3	3	1	1	1	3	3	3	1	3	3	3
BS00021728_51	1A	258.46	3	1	1	1	1	1	1	3	3	3	1	1	3	3	1	1	3	3	3	1	3	1	1	1	1	1	3	3	3	3	3	3	3	1	1	1	1	3	3	1	1	1	1	3	1	1	1
BS00065324_51	1A	258.46	1	3	3	3	3	3	3	1	1	1	3	3	1	1	3	3	1	1	1	3	1	3	3	3	3	3	1	1	1	1	1	1	1	3	3	3	3	1	1	3	3	3	3	1	3	3	3
BS00067652_51	1A	258.46	1	3	3	3	1	3	3	3	1	1	1	3	3	1	1	3	3	1	1	1	3	3	1	1	1	1	1	1	1	1	1	1	1	3	1	1	1	1	1	1	1	3	1	1	1	1	3
BS00067742_51	1A	258.46	3	3	3	3	3	3	3	1	3	3	3	3	1	3	3	3	3	3	3	3	1	3	3	3	3	3	1	3	3	3	3	3	1	3	3	3	3	3	3	3	3	3	3	3	3	3	3
Kukri_c18413_168	1A	258.46	3	1	3	1	1	1	3	3	3	3	3	3	3	3	3	1	3	3	3	3	3	1	3	3	3	1	3	3	3	3	3	3	3	1	3	3	3	3	3	1	3	3	3	3	3	3	3
Kukri_c39377_286	1A	258.46	3	1	3	1	3	1	3	1	3	3	3	3	1	3	3	1	3	3	3	3	1	1	3	3	3	3	3	3	3	3	3	3	3	1	3	3	3	3	3	3	3	3	3	3	3	3	3
Kukri_c53153_92	1A	258.46	3	1	3	1	1	1	3	3	3	3	3	3	3	3	3	1	3	3	3	3	3	1	3	3	3	1	3	3	3	3	3	3	3	1	3	3	3	3	3	1	3	3	3	3	3	3	3
RAC875_c29540_1109	1A	258.46	1	1	3	1	1	1	3	3	3	1	3	3	3	1	3	1	3	1	1	3	3	1	3	3	3	1	1	1	1	3	1	1	1	1	3	3	3	3	1	1	3	3	3	1	3	3	3
tplb0045g22_418	1A	258.46	3	1	1	1	3	1	1	1	3	3	3	1	1	3	3	1	1	3	3	3	1	1	3	3	3	3	3	3	3	3	3	3	3	1	3	3	3	3	3	3	3	1	3	3	3	3	1
wsnp_BG314157A_Ta_2_1	1A	258.46	1	3	1	3	3	3	1	1	1	1	1	1	1	1	1	3	1	1	1	1	1	3	1	1	1	3	1	1	1	1	1	1	1	3	1	1	1	1	1	3	1	1	1	1	1	1	1
wsnp_Ra_c9209_15425473	1A	258.46	1	3	3	3	1	3	3	3	3	1	1	3	3	1	1	3	3	1	1	1	3	3	1	1	1	1	1	1	1	3	1	1	1	3	1	1	1	3	1	1	1	3	1	1	1	1	3
RAC875_c29540_413	1A	259.48	1	3	3	3	3	3	3	3	3	1	3	3	3	1	3	3	3	1	1	3	3	3	3	3	3	3	1	1	1	3	1	1	1	3	3	3	3	3	1	3	3	3	3	1	3	3	3
RFL_Contig3919_1348	1A	259.48	3	3	3	3	3	3	3	3	3	3	3	3	3	1	3	3	3	3	3	3	3	3	3	3	3	3	1	3	3	3	3	3	1	3	3	3	3	3	3	3	3	3	3	3	3	3	3
wsnp_Ex_rep_c108951_91954190	1A	259.48	3	1	1	1	1	1	1	1	1	3	1	1	1	3	1	1	1	3	3	1	1	1	1	1	1	1	3	3	3	1	3	3	3	1	1	1	1	1	3	1	1	1	1	3	1	1	1
BS00065325_51	1A	260.38	1	1	3	1	1	1	3	1	1	1	3	3	1	1	3	1	1	1	1	3	1	1	3	3	3	1	1	1	1	1	1	1	1	1	3	3	3	1	1	1	3	3	3	1	3	3	3
BS00077432_51	1A	260.38	1	1	1	1	1	1	1	1	3	1	1	1	1	1	1	1	1	1	1	1	1	1	1	1	1	1	1	1	1	3	1	1	1	1	1	1	1	1	1	1	1	1	1	1	1	1	1
BS00100120_51	1A	260.38	1	3	3	3	1	3	3	3	3	1	3	3	3	3	3	3	3	1	1	3	3	3	3	3	3	1	3	1	1	3	1	1	3	3	3	3	3	1	1	1	1	3	3	1	3	3	3
Excalibur_c15357_432	1A	260.38	3	3	1	3	3	3	1	3	3	3	1	1	3	1	1	3	3	3	3	1	3	3	1	1	1	3	1	3	3	3	3	3	1	3	1	1	1	3	3	3	3	1	1	3	1	1	1
Kukri_rep_c117029_125	1A	260.38	3	1	1	1	3	1	1	3	1	3	1	1	3	1	1	1	1	3	3	1	3	1	1	1	1	3	1	3	3	1	3	3	1	1	1	1	1	3	3	3	1	1	1	3	1	1	1
RAC875_c24047_284	1A	260.38	1	1	3	1	1	1	3	1	3	1	3	3	1	1	3	1	1	1	1	3	1	1	3	3	3	1	1	1	1	3	1	1	1	1	3	3	3	3	1	1	3	3	3	1	3	3	3
RAC875_c49074_374	1A	260.38	1	1	1	1	1	1	1	3	1	1	1	1	3	1	1	1	1	1	1	1	3	1	1	1	1	1	3	1	1	1	1	1	3	1	1	1	1	3	1	1	1	1	1	1	1	1	1
RFL_Contig22_387	1A	260.38	1	1	3	1	1	1	3	1	1	1	3	3	1	1	3	1	1	1	1	3	1	1	3	3	3	1	1	1	1	1	1	1	1	1	3	3	3	1	1	1	3	3	3	1	3	3	3
TA004265.0757	1A	260.38	3	3	1	3	3	3	1	3	3	3	1	1	3	3	1	3	3	3	3	1	3	3	1	1	1	3	3	3	3	3	3	3	3	3	1	1	1	3	3	3	1	1	1	3	1	1	1
wsnp_BM140362A_Ta_2_2	1A	260.38	1	1	1	1	1	1	1	1	3	1	1	3	1	1	1	1	1	1	1	1	1	1	1	1	1	1	1	1	1	3	1	1	1	1	1	1	1	1	1	1	1	1	1	1	1	1	1
Kukri_c31891_1355	1A	260.68	1	1	1	1	1	1	1	3	1	1	3	NA	3	1	3	1	1	1	1	3	3	1	3	3	3	1	3	1	1	1	1	1	3	1	3	3	3	1	1	1	3	1	3	1	3	3	1
wsnp_Ex_c6452_11213329	1A	260.68	1	1	1	1	1	1	1	3	1	1	3	1	3	1	3	1	1	1	1	3	3	1	3	3	3	1	3	1	1	1	1	1	3	1	3	3	3	1	1	1	3	1	3	1	3	3	1
Kukri_c43410_348	1A	260.93	1	1	1	1	1	1	1	3	1	1	1	1	3	1	1	1	1	1	1	1	3	1	1	1	1	1	3	1	1	1	1	1	3	1	1	1	1	3	1	1	1	1	1	1	1	1	1
RAC875_c27417_150	1A	260.93	1	1	1	1	1	1	1	3	1	1	1	1	3	1	1	1	1	1	1	1	3	1	1	1	1	1	3	1	1	1	1	1	3	1	1	1	1	3	1	1	1	1	1	1	1	1	1
TA003063.0097	1A	261.09	1	1	1	1	1	1	1	3	3	1	3	3	3	1	3	1	1	1	1	3	3	1	3	3	3	1	3	1	1	3	1	1	3	1	3	3	3	3	1	1	3	1	3	1	3	3	1
BS00064638_51	1A	261.32	1	3	1	3	3	3	1	3	3	1	3	1	3	1	3	3	1	1	1	3	3	3	3	3	3	3	3	1	1	3	1	1	3	3	3	3	3	3	1	3	3	1	3	1	3	3	1
BS00065601_51	1A	261.32	3	3	3	3	3	3	3	3	3	3	1	1	3	3	1	3	3	3	3	1	3	3	1	1	1	3	3	3	3	3	3	3	3	3	1	1	1	3	3	3	1	3	1	3	1	1	3
CAP7_c1083_283	1A	261.32	3	3	3	3	3	3	3	3	3	3	1	3	3	3	1	3	3	3	3	1	3	3	1	1	1	3	3	3	3	3	3	3	3	3	1	1	NA	3	3	3	1	3	1	3	1	1	3
Kukri_c12758_617	1A	261.32	3	3	3	3	3	3	3	3	3	3	1	1	3	3	1	3	3	3	3	1	3	3	1	1	1	3	3	3	3	3	3	3	3	3	1	1	1	3	3	3	1	3	1	3	1	1	3
Kukri_c29121_226	1A	261.32	3	3	3	3	3	3	3	3	3	3	1	1	3	3	1	3	3	3	3	1	3	3	1	1	1	3	3	3	3	3	3	3	3	3	1	1	1	3	3	3	1	3	1	3	1	1	3
Kukri_c53935_265	1A	261.32	3	3	3	3	3	3	3	3	3	3	1	1	3	3	1	3	3	3	3	1	3	3	1	1	1	3	3	3	3	3	3	3	3	3	1	1	1	3	3	3	1	3	1	3	1	1	3
Kukri_rep_c105589_73	1A	261.32	1	1	1	1	1	1	1	1	1	1	3	3	1	1	3	1	1	1	1	3	1	1	3	3	3	1	1	1	1	1	1	1	1	1	3	3	3	1	1	1	3	1	3	1	3	3	1
RAC875_c46551_339	1A	261.32	1	1	1	1	1	1	1	3	1	1	3	3	3	1	3	1	1	1	1	3	3	1	3	3	3	1	3	1	1	1	1	1	3	1	3	3	3	3	1	1	3	1	3	1	3	3	1
wsnp_Ex_c3475_6362087	1A	261.32	3	3	3	3	3	3	3	3	3	3	1	3	3	3	1	3	3	3	3	1	3	3	1	1	1	3	3	3	3	3	3	3	3	3	1	1	1	3	3	3	1	3	1	3	1	1	3
wsnp_Ku_c10292_17066821	1A	261.32	1	1	1	1	1	1	1	1	1	1	3	1	1	1	3	1	1	1	1	3	1	1	3	3	3	1	1	1	1	1	1	1	1	1	3	3	3	1	1	1	3	1	3	1	3	3	1
wsnp_Ku_c1642_3232242	1A	261.32	1	1	1	1	1	1	1	1	1	1	3	1	1	1	3	1	1	1	1	3	1	NA	3	3	3	1	1	1	1	1	1	1	1	1	3	3	3	1	1	1	3	1	3	1	3	3	1
Excalibur_c3475_113	1A	262.13	1	1	1	1	1	1	1	3	1	1	3	1	3	1	3	1	1	1	1	3	3	1	3	3	3	1	3	1	1	1	1	1	3	1	3	3	3	3	1	1	3	1	3	1	3	3	1
BS00022173_51	1A	264.58	3	3	3	3	3	3	3	3	1	3	3	NA	3	3	3	3	3	3	3	3	3	3	3	3	3	3	3	3	3	1	3	3	3	3	3	3	3	3	3	3	3	3	3	3	3	3	3
BS00022220_51	1A	264.58	1	1	1	1	1	1	1	1	3	1	1	3	1	1	1	1	1	1	1	1	1	NA	1	1	1	1	1	1	1	3	1	1	1	1	1	1	1	1	1	1	1	1	1	1	1	1	1
BS00079538_51	1A	264.58	3	3	3	3	3	3	3	3	1	3	3	1	3	3	3	3	3	3	3	3	3	3	3	3	3	3	3	3	3	1	3	3	3	3	3	3	3	3	3	3	3	3	3	3	3	3	3
GENE.0511_403	1A	264.58	3	3	1	3	1	3	1	1	3	3	3	3	1	3	3	3	1	3	3	3	1	3	3	3	3	1	1	3	3	3	3	3	1	3	3	3	3	3	3	3	3	1	3	3	3	3	1
BS00088035_51	1A	265.98	1	1	3	1	1	1	3	1	3	3	3	1	1	3	3	1	1	3	3	3	1	1	3	3	3	1	1	1	3	3	1	1	3	1	3	3	3	1	3	1	3	3	3	3	3	3	3
Ku_c1313_1673	1A	265.98	1	1	1	1	1	1	1	1	3	1	3	3	1	1	3	1	1	1	1	3	3	1	1	3	3	1	1	1	1	3	1	1	1	1	3	3	3	1	1	1	3	1	3	1	3	3	1
Kukri_c1313_1158	1A	265.98	1	1	1	1	1	1	1	1	3	1	3	3	1	1	3	1	1	1	1	3	3	1	1	3	3	1	1	1	1	3	1	1	1	1	3	3	3	1	1	1	3	1	3	1	1	3	1
RAC875_c32452_55	1A	265.98	1	3	3	3	3	1	1	3	3	1	3	3	3	1	1	3	3	3	3	3	3	3	3	3	3	3	3	3	1	3	3	3	3	3	1	3	3	3	1	1	1	3	3	3	3	1	1
wsnp_Ex_c22284_31478675	1A	265.98	3	3	1	3	1	3	3	1	3	1	3	3	1	1	3	3	1	1	1	3	3	3	1	3	3	1	1	3	1	3	3	3	1	3	3	3	3	1	1	3	3	1	3	1	3	3	3
wsnp_Ex_c32590_41222878	1A	265.98	1	1	3	1	1	1	3	1	3	3	3	1	1	3	3	1	1	3	3	3	1	1	3	3	3	1	1	1	3	3	1	1	3	1	3	3	3	1	3	1	3	3	3	3	3	3	3
Kukri_c54678_88	1A	267.41	3	3	1	3	1	3	3	3	1	1	1	3	3	1	1	3	1	1	1	1	3	3	1	1	1	1	1	3	1	1	3	3	1	3	1	1	1	3	1	3	1	1	1	1	1	1	3
GENE.3454_74	1A	270.05	3	3	3	3	1	1	3	3	1	3	1	1	3	3	1	3	1	3	3	1	3	3	3	1	1	1	3	3	3	1	3	3	3	3	1	1	1	3	3	3	1	3	1	3	1	1	3
IAAV6234	1A	270.05	1	1	3	1	1	1	1	3	1	3	1	1	3	3	1	1	1	3	3	1	3	1	3	1	1	1	3	1	3	1	1	1	3	1	1	1	1	3	3	1	1	3	1	3	1	1	1
Ku_c10813_1122	1A	270.05	1	1	1	1	3	3	1	1	3	1	3	3	1	1	3	1	3	1	1	3	1	1	1	3	3	3	1	1	1	3	1	1	1	1	3	3	3	1	1	1	3	1	3	1	3	3	1
Ra_c64515_242	1A	270.05	3	3	3	3	1	1	3	3	1	3	1	1	3	3	1	3	1	3	3	1	3	3	3	1	1	1	3	3	3	1	3	3	3	3	1	1	1	3	3	3	1	3	1	3	1	1	3
wsnp_Ex_c1997_3755945	1A	270.05	1	1	1	1	3	3	1	3	3	1	3	3	3	1	3	1	3	1	1	3	3	1	1	3	3	3	1	1	1	3	1	1	3	1	3	3	3	3	1	1	3	1	3	1	3	3	1
Jagger_c5280_407	1A	271.29	1	1	1	1	3	3	1	3	3	1	3	3	3	1	3	1	3	1	1	3	1	1	1	3	3	3	1	1	1	3	1	1	1	1	3	3	3	3	1	1	3	1	3	1	3	3	1
Kukri_rep_c109473_80	1A	271.29	3	3	3	3	1	1	3	1	1	3	1	1	1	3	1	3	1	3	3	1	3	3	3	1	1	1	3	3	3	1	3	3	3	3	1	1	1	1	3	3	1	3	1	3	1	1	3
wsnp_Ex_c1997_3756118	1A	271.29	3	3	3	3	1	1	3	1	1	3	1	1	1	3	1	3	1	3	3	1	3	3	3	1	1	1	3	3	3	1	3	3	3	3	1	1	1	1	3	3	1	3	1	3	1	1	3
wsnp_JD_c6544_7697235	1A	271.29	3	3	3	3	1	1	3	1	1	3	1	1	1	3	1	3	1	3	3	1	3	3	3	1	1	1	3	3	3	1	3	3	3	3	1	1	1	1	3	3	1	3	1	3	1	1	3
wsnp_JD_c6544_7697412	1A	271.29	1	1	1	1	3	3	1	3	3	1	3	3	3	1	3	1	3	1	1	3	1	1	1	3	3	3	1	1	1	3	1	1	1	1	3	3	3	3	1	1	3	1	3	1	3	3	1
Kukri_c49170_655	1A	271.8	3	3	1	3	3	3	3	3	3	1	3	3	3	1	3	3	3	1	1	3	3	3	1	3	3	3	1	3	1	3	3	3	1	3	3	3	3	3	1	3	3	1	3	1	3	3	3
RAC875_c80876_67	1A	271.8	1	1	3	1	1	1	1	1	1	3	1	1	1	3	1	1	1	3	3	1	1	1	3	1	1	1	3	1	3	1	1	1	3	1	1	1	1	1	3	1	1	3	1	3	1	1	1
Kukri_c12984_465	1A	272.9	3	3	1	3	3	3	3	3	3	1	3	3	3	1	3	3	3	1	1	3	3	3	1	3	3	3	1	3	1	3	3	3	3	3	3	3	3	3	1	3	3	1	3	1	3	3	3
CAP12_c1979_117	1A	274.16	3	3	3	3	1	1	3	1	1	3	1	1	1	3	1	3	1	3	3	1	3	3	3	1	1	1	3	3	3	1	3	3	3	3	1	1	1	1	3	3	1	3	1	3	1	1	3
wsnp_Ku_c23012_32893918	1A	274.32	3	3	1	3	3	3	3	1	3	1	3	1	1	1	3	3	3	1	1	3	1	3	1	3	3	3	1	3	1	3	3	3	1	3	3	3	3	1	1	3	3	1	3	1	3	3	3
TA002402.1350	1A	276.27	1	1	1	1	3	3	1	1	3	1	3	1	1	1	3	1	3	1	1	3	3	1	1	3	3	3	1	1	1	3	1	1	1	1	3	3	3	1	1	1	3	1	3	1	3	3	1
Excalibur_c44668_382	1A	277.14	3	3	1	3	3	3	3	3	3	1	3	3	3	1	3	3	3	1	1	3	3	3	1	3	3	3	1	3	1	3	3	3	1	3	3	3	3	3	1	3	3	3	3	1	3	3	3
BS00088136_51	1A	278.9	1	1	1	1	3	3	1	1	3	1	3	1	1	1	3	1	3	1	1	3	3	1	1	3	3	3	1	1	1	3	1	1	1	1	3	3	3	1	1	1	3	1	3	1	3	3	1
Excalibur_c52725_585	1A	283.34	3	3	3	3	3	3	3	3	3	3	3	3	3	1	3	3	3	3	1	3	3	3	3	3	3	3	1	3	3	3	3	3	3	3	3	3	3	3	1	3	3	3	3	1	3	3	3
Ra_c24793_726	1A	283.34	3	3	3	3	3	3	3	3	3	3	3	3	3	1	3	3	3	3	1	3	3	3	3	3	3	3	1	3	3	3	3	3	3	3	3	3	3	3	1	3	3	3	3	1	3	3	3
wsnp_Ex_c1845_3472790	1A	283.34	3	3	3	3	3	3	3	3	3	3	3	3	3	1	3	3	3	3	1	3	3	3	3	3	3	3	1	3	3	3	3	3	3	3	3	3	3	3	1	3	3	3	3	1	3	3	3
wsnp_Ex_c9722_16062937	1A	283.34	3	3	3	3	3	3	3	3	3	3	1	1	3	3	1	3	3	3	3	1	3	3	3	1	1	3	3	3	3	3	3	3	3	3	1	3	1	3	3	3	3	3	1	3	1	3	3
Excalibur_c1845_4911	1A	284.07	3	3	3	3	3	3	3	3	3	3	3	3	3	1	3	3	3	3	1	3	3	3	3	3	3	3	1	3	3	3	3	3	3	3	3	3	3	3	1	3	3	3	3	1	3	3	3
Excalibur_c1845_718	1A	284.07	3	3	3	3	3	3	3	3	3	3	3	3	3	1	3	3	3	3	1	3	3	3	3	3	3	3	1	3	3	3	3	3	3	3	3	3	3	3	1	3	3	3	3	1	3	3	3
Excalibur_c65755_51	1A	284.07	1	1	1	1	1	1	1	1	1	1	1	1	1	3	1	1	1	1	3	1	1	1	1	1	1	1	3	1	1	1	1	1	1	1	1	1	1	1	3	1	1	1	1	3	1	1	1
IAAV1142	1A	284.07	1	1	1	1	1	1	1	1	1	1	1	1	1	3	1	1	1	1	3	1	1	1	1	1	1	1	3	1	1	1	1	1	1	1	1	1	1	1	3	1	1	1	1	3	1	1	1
Kukri_c28695_269	1A	284.07	3	3	3	3	3	3	3	3	3	3	3	3	3	1	3	3	3	3	1	3	3	3	3	3	3	3	1	3	3	3	3	3	3	3	3	3	3	3	1	3	3	3	3	1	3	3	3
Ra_c112300_429	1A	284.07	3	3	3	3	3	3	3	3	3	3	3	3	3	1	3	3	3	3	1	3	3	3	3	3	3	3	1	3	3	3	3	3	3	3	3	3	3	3	1	3	3	3	3	1	3	3	3
RAC875_c12993_127	1A	284.07	1	1	1	1	1	1	1	1	1	1	1	1	1	3	1	1	1	1	3	1	1	1	1	1	1	1	3	1	1	1	1	1	1	1	1	1	1	1	3	1	1	1	1	3	1	1	1
RAC875_c12993_201	1A	284.07	1	1	1	1	1	1	1	1	1	1	1	1	1	3	1	1	1	1	3	1	1	1	1	1	1	1	3	1	1	1	1	1	1	1	1	1	1	1	3	1	1	1	1	3	1	1	1
RAC875_c16149_1170	1A	284.07	1	1	1	1	1	1	1	1	1	1	1	1	1	3	1	1	1	1	3	1	1	1	1	1	1	1	3	1	1	1	1	1	1	1	1	1	1	1	3	1	1	1	1	3	1	1	1
RAC875_c16149_298	1A	284.07	1	1	1	1	1	1	1	1	1	1	1	1	1	3	1	1	1	1	3	1	1	1	1	1	1	1	3	1	1	1	1	1	1	1	1	1	1	1	3	1	1	1	1	3	1	1	1
RAC875_c45115_340	1A	284.07	1	1	1	1	1	1	1	1	1	1	1	1	1	3	1	1	1	1	3	1	1	1	1	1	1	1	3	1	1	1	1	1	1	1	1	1	1	1	3	1	1	1	1	3	1	1	1
RAC875_c45115_509	1A	284.07	3	3	3	3	3	3	3	3	3	3	3	3	3	1	3	3	3	3	1	3	3	3	3	3	3	3	1	3	3	3	3	3	3	3	3	3	3	3	1	3	3	3	3	1	3	3	3
wsnp_Ex_c13186_20822127	1A	284.07	1	1	1	1	1	1	1	1	1	1	1	1	1	3	1	1	1	1	3	1	1	1	1	1	1	1	3	1	1	1	1	1	1	1	1	1	1	1	3	1	1	1	1	3	1	1	1
wsnp_Ku_c21364_31103315	1A	284.07	1	1	1	1	1	1	1	1	1	1	1	1	1	3	1	1	1	1	3	1	1	1	1	1	1	1	3	1	1	1	1	1	1	1	1	1	1	1	3	1	1	1	1	3	1	1	1
BobWhite_c104_89	1A	289.05	1	1	1	1	3	3	1	1	3	3	1	3	1	1	1	1	3	1	1	1	3	3	1	1	1	3	1	1	1	3	1	1	1	1	1	1	1	1	1	3	1	1	1	1	1	1	1
BobWhite_c26212_208	1A	289.05	1	1	1	1	1	1	1	1	1	3	1	1	1	1	1	1	1	1	1	3	1	3	1	3	3	1	1	1	1	1	1	1	1	1	1	1	3	1	1	3	1	1	1	1	3	1	1
Excalibur_c29605_535	1A	289.05	1	1	1	1	1	1	1	1	1	3	1	1	1	3	1	1	1	1	3	1	1	3	1	1	1	1	1	3	1	1	3	3	1	1	1	1	1	1	3	3	1	1	1	3	1	1	1
Excalibur_c5033_587	1A	289.05	1	1	1	1	3	3	1	1	3	1	1	1	1	3	1	1	3	1	3	1	1	1	1	1	1	3	3	3	1	3	3	3	1	1	1	1	1	1	3	1	3	3	1	3	1	1	1
IAAV2694	1A	289.05	1	1	1	1	3	3	1	1	3	3	1	3	1	1	1	1	3	1	1	1	3	3	1	1	1	3	1	1	1	3	1	1	1	1	1	1	1	1	1	3	1	1	1	1	1	1	1
Kukri_c18017_1696	1A	289.05	1	1	1	1	3	3	1	1	3	1	1	1	1	3	1	1	3	1	3	1	1	1	1	1	1	3	3	3	1	3	3	3	1	1	1	1	1	1	3	1	3	3	1	3	1	1	1
tplb0031d22_1107	1A	289.05	3	3	3	3	3	3	3	3	3	1	3	3	3	3	3	3	3	3	3	1	3	1	3	1	1	3	3	3	3	3	3	3	3	3	3	3	1	3	3	1	3	3	3	3	1	3	3
wsnp_BE517729A_Ta_2_1	1A	289.05	3	3	3	3	3	3	3	3	3	1	3	3	3	3	3	3	3	3	3	1	3	1	3	1	1	3	3	3	3	3	3	3	3	3	3	3	1	3	3	1	3	3	3	3	1	3	3
BobWhite_c27438_81	1A	291.66	3	3	3	3	3	3	3	3	3	1	3	3	3	3	3	3	3	1	3	1	3	1	1	1	1	3	1	3	1	3	3	3	3	3	3	3	1	1	3	1	3	3	3	3	1	1	3
BS00011146_51	1A	291.66	3	3	3	3	3	1	3	3	1	3	3	3	3	3	3	3	1	3	3	3	1	3	3	3	3	1	3	3	3	1	3	3	3	3	3	3	3	3	1	3	3	3	3	3	3	3	3
BS00039378_51	1A	291.66	3	3	3	3	3	1	3	3	1	1	3	3	3	3	3	3	1	3	3	1	1	1	1	1	1	1	1	3	3	1	3	3	3	3	3	3	1	1	1	1	3	3	3	3	1	1	3
BS00065430_51	1A	291.66	1	1	1	1	1	3	1	1	3	3	1	1	1	1	1	1	3	1	1	3	3	3	3	3	3	3	3	1	1	3	1	1	1	1	1	1	3	3	3	3	1	1	1	1	3	3	1
CAP12_c3602_91	1A	291.66	1	1	1	1	1	3	1	1	3	1	1	1	1	1	1	1	3	1	1	1	3	1	1	1	1	3	1	1	1	3	1	1	1	1	1	1	1	1	3	1	1	1	1	1	1	1	1
RAC875_rep_c120644_74	1A	291.66	1	1	1	1	1	3	1	1	3	1	1	1	1	1	1	1	3	1	1	1	3	1	1	1	1	3	1	1	1	3	1	1	1	1	1	1	1	1	3	1	1	1	1	1	1	1	1
Tdurum_contig12576_159	1A	291.66	3	3	3	3	3	3	3	3	3	1	3	3	3	3	3	3	3	3	3	1	3	1	3	1	1	3	3	3	3	3	3	3	3	3	3	3	1	3	3	1	3	3	3	3	1	3	3
wsnp_Ku_c5210_9289260	1A	291.66	1	1	1	1	1	3	1	1	3	3	1	1	1	1	1	1	3	3	1	3	3	3	3	3	3	3	3	1	3	3	1	1	1	1	1	1	3	3	3	3	1	1	1	1	3	3	1
wsnp_Ku_c5210_9290700	1A	291.66	1	1	1	1	1	1	1	1	1	3	1	1	1	1	1	1	1	3	1	3	1	3	3	3	3	1	3	1	3	1	1	1	1	1	1	1	3	3	1	3	1	1	1	1	3	3	1
BS00039377_51	1A	293.96	1	1	1	1	1	3	1	1	3	3	1	1	1	1	1	1	3	1	1	3	3	3	3	3	3	3	3	1	1	3	1	1	1	1	1	1	3	3	3	3	1	1	1	1	3	3	1
BS00062876_51	1A	293.96	3	3	3	3	3	1	3	3	1	1	3	3	3	1	3	3	1	3	3	1	1	NA	1	1	1	1	1	3	3	1	3	3	3	3	3	3	1	1	1	1	3	3	3	3	1	1	3
CAP7_c1891_230	1A	293.96	1	1	1	1	1	3	1	1	3	3	1	1	1	3	1	1	3	1	1	3	3	3	3	3	3	3	3	1	1	3	1	1	1	1	1	1	3	3	3	3	1	1	1	1	3	3	1
Ku_c17322_2436	1A	293.96	1	1	1	1	1	1	1	1	1	3	1	1	1	1	1	1	1	1	1	3	1	3	3	3	3	1	3	1	1	1	1	1	1	1	1	1	3	3	1	3	1	1	1	1	3	3	1
Kukri_c67383_102	1A	293.96	1	1	1	1	1	3	1	1	3	3	1	1	1	3	1	1	3	1	1	3	3	3	3	3	3	3	3	1	1	3	1	1	1	1	1	1	3	3	3	3	3	1	1	1	3	3	1
wsnp_Ex_c3258_6004611	1A	293.96	1	1	1	1	1	3	1	1	3	3	1	1	1	3	1	1	3	1	1	3	3	3	3	3	3	3	3	1	1	3	1	1	1	1	1	1	3	3	3	3	3	1	1	1	3	3	1
wsnp_Ex_c43228_49605281	1A	293.96	1	1	1	1	1	3	1	1	3	3	1	NA	1	3	1	1	3	1	1	3	3	NA	3	3	3	3	3	1	1	3	1	1	1	1	1	1	3	3	3	3	1	1	1	1	3	3	1
wsnp_Ex_rep_c68085_66839109	1A	293.96	1	1	1	1	1	3	1	1	3	3	1	1	1	3	1	1	3	1	1	3	3	3	3	3	3	3	3	1	1	3	1	1	1	1	1	1	3	3	3	3	3	1	1	1	3	3	1
wsnp_Ku_c17322_26392311	1A	293.96	1	1	1	1	1	3	1	1	3	3	1	1	1	1	1	1	3	1	1	3	3	3	3	3	3	3	3	1	1	3	1	1	1	1	1	1	3	3	3	3	1	1	1	1	3	3	1
BS00034278_51	1A	295.05	1	1	1	1	1	3	1	1	3	3	1	1	1	3	1	1	3	1	1	3	3	3	3	3	3	3	3	1	1	3	1	1	1	1	1	1	3	3	3	3	1	1	1	1	3	3	1
CAP11_c1021_200	1A	295.05	1	1	1	1	1	3	1	1	3	3	1	1	1	1	1	1	3	1	1	3	3	3	3	3	3	3	1	1	1	3	1	1	1	1	1	1	3	1	3	3	1	1	1	1	3	1	1
GENE.0392_97	1A	295.05	3	3	3	3	3	1	3	3	1	1	3	3	3	3	3	3	1	3	3	1	1	1	1	1	1	1	1	3	3	1	3	3	3	3	3	3	1	1	1	1	3	3	3	3	1	1	3
wsnp_Ex_c20495_29571203	1A	295.05	3	3	3	3	3	3	3	1	3	3	3	3	3	1	3	3	3	3	1	3	3	3	3	3	3	3	3	1	3	3	1	1	3	3	3	3	3	3	3	3	3	3	1	1	3	3	3
wsnp_Ex_c3145_5812670	1A	295.05	3	3	3	3	3	3	3	1	3	3	3	3	3	1	3	3	3	3	1	3	3	3	3	3	3	3	3	1	3	3	1	1	3	3	3	3	3	3	3	3	3	3	1	1	3	3	3
wsnp_Ex_rep_c68493_67320068	1A	295.05	3	3	3	3	3	1	3	3	1	1	3	3	3	1	3	3	1	3	3	1	1	1	1	1	1	1	1	3	3	1	3	3	3	3	3	3	1	1	1	1	1	3	3	3	1	1	3
wsnp_Ex_rep_c68493_67319880	1A	296.45	3	3	3	3	3	3	3	3	3	3	3	3	3	3	3	3	3	3	1	3	3	3	3	3	3	3	3	1	3	3	1	1	3	3	3	3	3	3	3	3	3	3	1	1	3	3	3
GENE.0527_92	1A	298.52	3	1	1	3	3	1	1	3	3	3	1	1	3	3	1	1	3	1	1	3	3	3	1	3	3	3	1	1	1	3	1	1	1	1	1	1	3	1	3	3	3	1	1	1	3	1	1
IACX7716	1A	298.52	3	1	1	3	3	3	1	1	3	1	1	1	1	1	1	1	3	1	1	1	3	1	1	1	1	3	1	1	1	3	1	1	1	1	1	1	1	1	3	1	1	1	1	1	1	1	1
RAC875_rep_c95460_302	1A	298.52	1	1	1	1	1	1	1	3	1	3	3	1	3	3	3	1	1	3	3	3	1	3	1	1	3	1	1	3	3	1	3	3	1	1	3	1	1	1	1	3	3	1	3	3	3	1	1
BS00087588_51	1A	305.73	3	3	3	3	3	3	3	3	3	1	3	3	1	3	3	3	3	3	3	1	3	NA	3	3	1	3	3	3	3	3	3	3	3	3	3	3	3	3	3	1	3	3	3	3	3	3	3
wsnp_Ra_rep_c95460_83855592	1A	305.73	3	3	3	3	3	3	3	3	3	1	3	3	1	3	3	3	3	3	3	1	3	1	3	3	1	3	3	3	3	3	3	3	3	3	3	3	3	3	3	1	3	3	3	3	3	3	3
BS00065750_51	1A	308.92	1	3	3	1	1	3	3	3	1	3	3	1	3	3	3	3	1	3	3	1	1	3	1	1	1	1	3	3	3	1	3	3	3	3	3	3	1	3	1	1	3	3	3	3	3	1	3
Kukri_c84024_375	1A	310.65	1	3	3	1	1	3	3	3	1	3	3	1	3	3	3	3	1	3	3	1	1	3	1	3	1	1	3	3	3	1	3	3	3	3	3	3	1	3	1	1	3	3	3	3	3	1	3
IAAV8743	1A	311.34	3	3	1	3	3	3	3	1	3	1	1	3	3	1	1	3	3	1	1	3	3	3	3	3	3	3	1	1	1	3	1	1	1	3	1	1	3	1	3	3	1	1	1	1	1	3	3
wsnp_Ra_c15564_23999084	1A	312.46	1	1	3	1	1	1	1	1	1	1	3	1	1	1	3	1	1	1	3	1	1	1	3	3	1	1	3	3	1	1	3	3	3	1	3	1	1	3	1	1	1	3	3	3	1	3	1
Excalibur_c39257_634	1A	313.23	3	3	3	3	3	3	3	3	3	3	3	3	3	3	3	3	3	3	3	1	3	3	3	3	1	3	3	3	3	3	3	3	3	3	3	3	3	3	3	1	3	3	3	3	3	3	3
CAP7_c4879_249	1A	313.85	1	1	3	1	1	1	1	3	1	3	3	NA	1	3	3	1	1	3	3	1	1	1	1	1	1	1	3	3	3	1	3	3	3	1	3	3	NA	3	1	1	3	3	3	3	3	1	1
wsnp_Ex_c6563_11378915	1A	313.85	1	1	3	1	1	1	1	3	1	3	3	1	1	3	3	1	1	3	3	1	1	1	1	1	1	1	3	3	3	1	3	3	3	1	3	3	1	3	1	1	3	3	3	3	3	1	1
RAC875_c15975_1208	1A	314.78	1	1	3	1	1	1	1	3	1	3	3	1	1	3	3	1	1	3	3	1	1	1	1	1	1	1	1	3	3	1	3	3	3	1	3	3	1	3	1	1	3	3	3	3	3	1	1
BS00009104_51	1A	315.94	1	1	3	1	1	1	1	3	1	3	3	3	1	3	3	1	1	3	3	3	3	1	1	1	1	3	1	3	3	1	3	3	3	1	3	3	3	3	1	1	3	3	3	3	3	1	1
Excalibur_c1066_303	1A	315.94	1	1	1	1	1	1	1	1	1	1	1	3	1	1	1	1	1	1	1	3	3	1	1	1	1	3	1	1	1	1	1	1	1	1	1	1	3	1	1	1	1	1	1	1	1	1	1
wsnp_CAP7_c3472_1623955	1A	315.94	1	1	3	1	1	1	1	3	1	3	3	3	1	3	3	1	1	3	3	3	3	1	1	1	1	3	1	3	3	1	3	3	3	1	3	3	3	3	1	1	3	3	3	3	3	1	1
Kukri_c49463_154	1A	316.86	3	1	1	3	3	1	1	1	3	3	3	3	3	3	3	1	3	3	3	3	3	3	3	3	1	3	1	3	3	3	3	3	1	1	3	1	3	1	3	1	3	1	3	3	3	3	1
RAC875_c102343_204	1A	316.86	3	1	3	3	3	1	1	3	3	3	3	1	3	3	3	1	3	3	3	1	1	1	3	3	1	1	3	3	3	3	3	3	3	1	3	3	1	3	3	3	3	3	3	3	3	3	1
BobWhite_c13761_242	1A	317.79	3	1	1	3	3	1	1	1	3	3	3	3	3	3	3	1	3	3	3	3	3	3	3	3	1	3	3	3	3	3	3	3	1	1	3	1	3	1	3	1	3	1	3	3	3	3	1
BS00012042_51	1A	317.79	3	3	1	3	3	3	3	1	3	1	1	3	3	1	1	3	3	1	1	3	3	3	3	3	3	3	3	1	1	3	1	1	1	3	1	1	3	1	3	3	1	1	1	1	1	3	3
BS00022396_51	1A	317.79	1	3	3	1	1	3	3	3	1	1	1	1	1	1	1	3	1	1	1	1	1	1	1	1	3	1	1	1	1	1	1	1	3	3	1	3	1	3	1	3	1	3	1	1	1	1	3
BS00088350_51	1A	317.79	3	1	1	3	3	1	1	1	3	3	3	3	3	3	3	1	3	3	3	3	3	3	3	3	1	3	3	3	3	3	3	3	1	1	3	1	3	1	3	1	3	1	3	3	3	3	1
BS00110130_51	1A	317.79	1	1	1	1	1	1	1	1	1	1	1	1	1	1	1	1	1	1	1	1	1	1	1	1	1	1	3	1	1	1	1	1	1	1	1	1	1	1	1	1	1	1	1	1	1	1	1
Excalibur_c14859_394	1A	317.79	1	1	3	1	1	1	1	1	3	1	1	1	3	1	1	3	1	1	3	1	3	1	1	1	1	1	1	1	1	1	1	3	1	1	1	1	1	1	3	3	3	1	3	3	3	1	1
RAC875_c25814_361	1A	317.79	3	3	3	3	3	3	3	3	3	3	3	3	3	3	3	3	3	3	3	3	3	3	3	1	3	3	1	3	3	3	3	3	3	3	3	3	3	3	3	3	3	3	3	3	3	3	3
RAC875_rep_c102893_780	1A	317.79	3	3	3	3	3	3	3	3	3	3	3	1	3	3	3	3	3	3	3	1	1	1	3	3	3	1	3	3	3	3	3	3	3	3	3	3	1	3	3	3	3	3	3	3	3	3	3
wsnp_BG606986A_Ta_2_1	1A	317.79	3	1	1	3	3	1	1	1	3	3	3	3	3	3	3	1	3	3	3	3	3	3	3	3	1	3	3	3	3	3	3	3	1	1	3	1	3	1	3	1	3	1	3	3	3	3	1
wsnp_BG606986A_Ta_2_4	1A	317.79	3	1	1	3	3	1	1	1	3	3	3	3	3	3	3	1	3	3	3	3	3	3	3	3	1	3	3	3	3	3	3	3	1	1	3	1	3	1	3	1	3	1	3	3	3	3	1
wsnp_JD_c13384_13393159	1A	317.79	3	1	1	3	3	1	1	1	3	3	3	3	3	3	3	1	3	3	3	3	3	3	3	3	1	3	3	3	3	3	3	3	1	1	3	1	3	1	3	1	3	1	3	3	3	3	1
BS00022261_51	1A	321.58	3	1	3	3	3	1	1	1	3	3	3	1	NA	3	3	1	3	3	3	1	1	1	3	1	1	1	2	3	3	3	3	3	1	1	3	1	1	3	3	3	3	2	3	3	3	3	1
BS00110627_51	1A	321.58	1	3	1	1	1	3	3	3	1	1	1	3	1	1	1	3	1	1	1	3	3	3	1	3	3	3	3	1	1	1	1	1	3	3	1	3	3	1	1	3	1	3	1	1	1	1	3
Ex_c4060_510	1A	321.58	1	3	1	1	1	3	3	3	1	1	1	3	1	1	1	3	1	1	1	3	3	3	1	3	3	3	3	1	1	1	1	1	3	3	1	3	3	1	1	1	1	3	1	1	1	1	3
GENE.0262_431	1A	321.58	1	3	1	1	1	3	3	3	1	1	1	3	1	1	1	3	1	1	1	3	3	3	1	3	3	3	3	1	1	1	1	1	3	3	1	3	3	1	1	1	1	3	1	1	1	1	3
RAC875_c6798_467	1A	321.58	3	1	3	3	3	1	1	1	3	3	3	1	3	3	3	1	3	3	3	1	1	1	3	1	1	1	1	3	3	3	3	3	1	1	3	1	1	3	3	3	3	1	3	3	3	3	1
RAC875_c56690_320	1A	325.03	1	1	1	1	1	1	1	1	1	1	1	3	1	1	1	1	1	1	1	3	1	3	1	1	1	3	1	1	1	1	1	1	1	1	1	1	1	1	1	1	1	1	1	1	1	1	1
BobWhite_c23632_322	1A	326.51	1	1	1	1	1	1	1	1	1	1	1	1	1	1	1	1	1	1	1	1	1	1	1	1	1	1	3	1	1	1	1	1	1	1	1	1	1	1	1	1	1	1	1	1	1	1	1
BS00073413_51	1A	326.51	3	3	3	3	3	3	3	3	3	3	3	3	3	3	3	3	3	3	3	3	3	3	1	3	3	3	3	3	3	3	3	3	3	3	3	3	3	3	3	1	3	3	3	3	3	3	3
Excalibur_c97157_137	1A	326.51	3	3	1	3	3	3	3	3	3	3	3	3	3	3	3	3	3	3	3	3	3	3	1	3	3	3	1	3	3	3	3	3	3	3	3	3	3	3	3	3	3	3	3	3	3	3	3
GENE.0069_468	1A	326.51	1	1	1	1	1	1	1	1	1	1	1	1	1	1	1	1	1	1	1	1	1	1	3	1	1	1	1	1	1	1	1	1	1	1	1	1	1	1	1	1	1	1	1	1	1	1	1
IACX5994	1A	326.51	1	1	1	1	1	1	1	1	1	1	1	1	1	1	1	1	1	1	1	1	1	1	3	1	1	1	3	1	1	1	1	1	1	1	1	1	1	1	1	1	1	1	1	1	1	1	1
Kukri_c7119_392	1A	326.51	1	1	1	1	1	1	1	1	1	1	1	1	1	1	1	1	1	1	1	1	1	1	3	1	1	1	1	1	1	1	1	1	1	1	1	1	1	1	1	1	1	1	1	1	1	1	1
RAC875_c120509_133	1A	326.51	3	3	3	3	3	3	3	3	3	3	3	3	3	3	3	3	3	3	3	3	3	3	1	3	3	3	1	3	3	3	3	3	3	3	3	3	3	3	3	3	3	3	3	3	3	3	3
RAC875_c21411_162	1A	326.51	1	1	1	1	1	1	1	1	1	1	1	1	1	1	1	1	1	1	1	1	1	1	3	1	1	1	3	1	1	1	1	1	1	1	1	1	1	1	1	1	1	1	1	1	1	1	1
RAC875_c23168_480	1A	326.51	3	3	3	3	3	3	3	3	3	3	3	3	3	3	3	3	3	3	3	3	3	3	1	3	3	3	3	3	3	3	3	3	3	3	3	3	3	3	3	3	3	3	3	3	3	3	3
TA001600.1603	1A	326.51	1	1	1	1	1	1	3	3	3	1	1	1	3	1	1	1	3	1	1	1	3	1	1	3	3	1	1	1	1	1	1	1	3	1	1	3	3	1	1	1	3	1	1	1	1	3	3
Tdurum_contig21114_255	1A	326.51	3	3	3	3	3	3	3	3	3	3	3	3	3	3	3	3	3	3	3	3	3	3	3	3	3	3	1	3	3	3	3	3	3	3	3	3	3	3	3	3	3	3	3	3	3	3	3
wsnp_BE444305A_Td_2_1	1A	326.51	1	1	1	1	1	1	1	1	1	1	1	1	1	1	1	1	1	1	1	1	1	1	1	1	1	1	3	1	1	1	1	1	1	1	1	1	1	1	1	1	1	1	1	1	1	1	1
wsnp_Ex_c33452_41938013	1A	326.51	1	1	1	1	1	1	1	1	1	1	1	1	1	1	1	1	1	1	1	1	1	1	3	1	1	1	3	1	1	1	1	1	1	1	1	1	1	1	1	1	1	1	1	1	1	1	1
wsnp_Ex_c33452_41938159	1A	326.51	1	1	1	1	1	1	1	1	1	1	1	1	1	1	1	1	1	1	1	1	1	1	3	1	1	1	3	1	1	1	1	1	1	1	1	1	1	1	1	1	1	1	1	1	1	1	1
wsnp_Ex_c41953_48658353	1A	326.51	1	1	1	1	1	1	3	3	3	1	1	1	3	1	1	1	3	1	1	1	3	1	1	3	3	1	1	1	1	1	1	1	3	1	1	3	3	1	1	1	3	1	1	1	1	3	3
wsnp_Ra_c22110_31550370	1A	326.51	1	1	1	1	1	1	1	1	1	1	1	1	1	1	1	1	1	1	1	1	1	1	3	1	1	1	3	1	1	1	1	1	1	1	1	1	1	1	1	1	1	1	1	1	1	1	1
Ra_c110766_321	1A	328.14	1	3	3	1	1	3	1	1	3	1	1	1	3	3	1	3	3	1	3	1	3	1	1	3	3	1	1	1	1	1	1	1	1	3	1	1	3	1	3	3	3	1	1	3	3	3	1
Ku_c8992_405	1A	329.26	3	1	3	3	3	1	3	3	1	3	3	3	1	3	3	1	1	3	3	3	1	3	3	3	1	3	3	3	3	3	3	3	3	1	3	3	1	3	3	3	1	3	3	3	3	1	3
RAC875_rep_c105766_652	1A	329.26	3	1	3	3	3	1	3	3	3	3	3	3	3	3	3	1	3	3	3	3	3	3	3	3	1	3	3	3	3	3	3	3	3	1	3	3	3	3	3	1	3	3	3	3	3	3	3
wsnp_Ex_rep_c102067_87313597	1A	329.26	3	1	3	3	3	1	3	3	3	3	3	3	3	3	3	1	3	3	3	3	3	3	3	3	1	3	3	3	3	3	3	3	3	1	3	3	3	3	3	1	3	3	3	3	3	3	3
RAC875_c12348_720	1A	332.44	1	3	1	1	1	3	1	1	3	1	1	1	3	1	1	3	3	1	1	1	3	1	1	1	3	1	1	1	1	1	1	1	1	3	1	1	3	1	1	3	1	1	1	1	1	3	1
wsnp_Ex_rep_c102067_87314043	1A	332.44	1	3	1	1	1	3	1	1	3	1	1	1	3	1	1	3	3	1	1	1	3	1	1	1	3	1	1	1	1	1	1	1	1	3	1	1	3	1	1	3	1	1	1	1	1	3	1
Tdurum_contig56158_60	1A	332.47	1	3	1	1	1	3	1	1	3	1	1	1	3	1	1	3	3	1	1	1	3	1	1	1	3	1	1	1	1	1	1	1	1	3	1	1	3	1	1	3	1	1	1	1	1	3	1
RAC875_c67771_805	1A	332.98	1	1	1	1	1	1	3	1	3	1	1	1	3	1	1	1	3	1	1	1	3	1	3	1	3	1	1	1	1	1	1	1	1	1	3	1	3	1	1	3	1	1	1	1	1	3	3
RAC875_c41993_582	1A	333.28	3	3	3	3	3	3	1	3	3	3	3	3	3	3	3	3	3	3	3	3	3	3	1	3	1	3	3	3	3	3	3	3	3	3	1	3	3	3	3	1	3	3	3	3	3	3	1
TA005289.1104	1A	333.28	1	1	1	1	1	1	3	1	1	1	1	1	1	NA	1	1	1	1	1	1	1	1	3	1	3	1	1	1	1	1	1	1	1	1	3	1	1	1	1	3	1	1	1	1	1	1	3
BobWhite_c41272_159	1A	333.66	3	3	3	3	3	3	1	3	1	3	3	3	1	3	3	3	1	3	3	3	1	3	1	3	3	3	3	3	3	3	3	3	3	3	1	3	1	3	3	1	3	3	3	3	3	1	1
GENE.0033_233	1A	333.66	3	3	3	3	3	3	3	3	1	3	3	3	1	3	3	3	1	3	3	3	1	3	3	3	3	3	3	3	3	3	3	3	3	3	3	3	1	3	3	1	3	3	3	3	3	1	3
RFL_Contig5334_1969	1A	333.66	1	3	1	1	1	3	1	1	3	1	1	1	3	1	1	3	3	1	1	1	3	1	1	1	3	1	1	1	1	1	1	1	1	3	1	1	3	1	1	3	1	1	1	1	1	3	1
Tdurum_contig96086_74	1A	333.66	1	1	1	1	1	1	3	1	3	1	1	1	3	1	1	1	3	1	1	1	3	1	3	1	1	1	1	1	1	1	1	1	1	1	3	1	3	1	1	3	1	1	1	1	1	3	3
wsnp_BE443588A_Ta_2_1	1A	333.66	3	3	3	3	3	3	3	3	1	3	3	3	1	3	3	3	1	3	3	3	1	3	3	3	3	3	3	3	3	3	3	3	3	3	3	3	1	3	3	1	3	3	3	3	3	1	3
wsnp_BE443588A_Ta_2_2	1A	333.66	3	3	3	3	3	3	3	3	1	3	3	3	1	3	3	3	1	3	3	3	1	3	3	3	3	3	3	3	3	3	3	3	3	3	3	3	NA	3	3	1	3	3	3	3	3	1	3
wsnp_Ex_c4612_8254533	1A	333.66	1	1	1	1	1	1	3	1	3	1	1	1	3	1	1	1	3	1	1	1	3	1	3	1	1	1	1	1	1	1	1	1	1	1	3	1	3	1	1	3	1	1	1	1	1	3	3
BS00023935_51	1A	334.02	3	3	3	3	3	3	1	3	3	3	3	3	3	3	3	3	3	3	3	3	3	3	1	3	3	3	3	3	3	3	3	3	3	3	1	3	3	3	3	1	3	3	3	3	3	3	1
BS00068391_51	1A	334.02	1	1	1	1	1	1	3	1	3	1	1	1	3	1	1	1	3	1	1	1	3	1	3	1	1	1	1	1	1	1	1	1	1	1	3	1	3	1	1	3	1	1	1	1	1	3	3
RFL_Contig5334_831	1A	334.02	3	1	3	3	3	1	3	3	3	3	3	3	3	3	3	1	3	3	3	3	3	3	3	3	1	3	3	3	3	3	3	3	3	1	3	3	3	3	3	1	3	3	3	3	3	3	3
BobWhite_c22134_398	1A	335.72	1	1	1	1	1	1	3	1	1	1	1	1	1	1	1	1	1	1	1	1	1	1	3	1	3	1	1	1	1	1	1	1	1	1	3	1	1	1	1	3	1	1	1	1	1	1	3
Tdurum_contig20183_507	1A	335.72	1	1	1	1	1	1	1	1	1	1	1	1	1	1	1	1	1	1	1	1	1	1	1	1	1	1	1	1	1	1	1	1	1	1	1	1	1	1	1	1	1	1	1	1	1	1	1
wsnp_BE444359A_Ta_2_1	1A	335.72	3	3	3	3	3	3	3	3	3	3	3	3	3	3	3	3	3	3	3	3	3	3	3	3	3	3	3	3	3	3	3	3	3	3	3	3	3	3	3	3	3	3	3	3	3	3	3
BS00037976_51	1A	337.41	1	1	1	1	1	1	3	1	3	1	1	1	3	1	1	1	3	1	1	1	3	1	3	1	1	1	1	1	1	1	1	1	1	1	3	1	3	1	1	3	1	1	1	1	1	3	3
Tdurum_contig51833_439	1A	339.52	3	3	3	3	3	3	3	3	1	3	3	3	1	1	3	3	1	3	1	3	1	3	3	3	3	3	3	3	3	3	3	3	3	3	1	1	1	3	3	3	3	3	3	1	3	1	3
Tdurum_contig10365_341	1A	340.29	1	1	1	1	1	1	1	1	1	1	1	1	1	3	1	1	1	1	3	1	1	1	1	1	1	1	1	1	1	1	1	1	1	1	1	3	1	1	1	1	1	1	1	3	1	1	1
BS00036104_51	1A	341.75	3	1	3	3	3	1	3	3	3	3	3	3	3	3	3	3	3	3	3	3	3	3	3	3	3	3	3	3	3	3	3	3	3	1	3	3	3	3	3	3	1	3	3	3	3	3	3
BS00078085_51	1A	341.75	3	3	3	3	3	3	1	3	1	3	3	3	1	1	3	3	1	3	1	3	1	3	1	1	3	3	3	3	3	3	3	3	3	3	1	1	1	3	1	1	3	3	3	1	1	1	1
BS00080076_51	1A	341.75	3	3	3	3	3	3	3	3	1	3	3	3	1	1	3	3	1	3	1	3	1	3	3	1	3	3	3	3	3	3	3	3	3	3	3	1	1	3	1	3	3	3	3	1	1	1	3
BS00095510_51	1A	341.75	3	3	3	3	3	3	1	3	1	3	3	3	1	1	3	3	1	3	1	3	1	3	1	1	3	3	3	3	3	3	3	3	3	3	1	1	1	3	1	1	3	3	3	1	1	1	1
Ex_c2226_244	1A	341.75	3	3	3	3	3	3	3	3	1	3	3	3	1	1	3	3	1	3	1	3	1	3	3	1	3	3	3	3	3	3	3	3	3	3	3	1	1	3	1	3	3	3	3	1	1	1	3
Excalibur_c54842_340	1A	341.75	3	1	3	3	3	1	3	3	1	3	3	3	1	3	3	3	1	3	3	3	1	3	3	3	3	3	3	3	3	3	3	3	3	1	1	3	1	3	3	3	1	3	3	3	3	1	3
Kukri_c18274_551	1A	341.75	1	3	1	1	1	3	1	1	3	1	1	1	3	1	1	1	3	1	1	1	3	1	1	1	1	1	1	1	1	1	1	1	1	3	3	1	3	1	1	1	3	1	1	1	1	3	1
Ra_c29200_300	1A	341.75	1	3	1	1	1	3	1	1	3	1	1	1	3	3	1	1	3	1	3	1	3	1	1	1	1	1	1	1	1	1	1	1	1	3	3	3	3	1	1	1	3	1	1	3	1	3	1
RAC875_c60162_206	1A	341.75	3	1	3	3	3	1	3	3	3	3	3	3	3	3	3	3	3	3	3	3	3	3	3	3	3	3	3	3	3	3	3	3	3	1	3	3	3	3	3	3	1	3	3	3	3	3	3
wsnp_CAP11_c1815_982483	1A	341.75	3	3	3	3	3	3	1	3	1	3	3	3	1	1	3	3	1	3	1	3	1	3	1	1	3	3	3	3	3	3	3	3	3	3	1	1	1	3	1	1	3	3	3	1	1	1	1
wsnp_Ex_c1359_2604298	1A	341.75	1	3	1	1	1	3	1	1	3	1	1	1	3	1	1	1	3	1	1	1	3	1	1	1	1	1	1	1	1	1	1	1	1	3	3	1	3	1	1	1	3	1	1	1	1	3	1
BobWhite_c24825_349	1A	342.49	1	3	1	1	1	3	1	1	3	1	1	1	3	3	1	1	3	1	3	1	3	1	1	1	1	1	1	1	1	1	1	1	1	3	3	3	3	1	1	1	3	1	1	3	1	3	1
JD_c13024_360	1A	342.49	3	1	3	3	3	1	3	3	1	3	3	3	1	1	3	3	1	3	1	3	1	3	3	3	3	3	3	3	3	3	3	3	3	1	1	1	1	3	3	3	1	3	3	1	3	1	3
RAC875_c60162_129	1A	342.49	3	1	3	3	3	1	3	3	1	3	3	3	1	1	3	3	1	3	1	3	1	3	3	3	3	3	3	3	3	3	3	3	3	1	1	1	1	3	3	3	1	3	3	1	3	1	3
Tdurum_contig75762_377	1A	342.49	3	1	3	3	3	1	3	3	1	3	3	3	1	1	3	3	1	3	1	3	1	3	3	3	3	3	3	3	3	3	3	3	3	1	1	1	1	3	3	3	1	3	3	1	3	1	3
Tdurum_contig75762_406	1A	342.49	1	3	1	1	1	3	1	1	3	1	1	1	3	3	1	1	3	1	3	1	3	1	1	1	1	1	1	1	1	1	1	1	1	3	3	3	3	1	1	1	3	1	1	3	1	3	1
wsnp_JD_c13024_13129681	1A	342.49	1	3	1	1	1	3	1	1	3	1	1	NA	3	3	1	1	3	1	3	1	3	1	1	1	1	1	1	1	1	1	1	1	1	3	3	3	3	1	1	1	3	1	1	3	1	3	1
wsnp_CAP8_c4785_2322876	1A	343.18	3	3	3	3	3	3	1	3	3	3	3	3	3	3	3	3	3	3	3	3	3	3	1	3	3	3	3	3	3	3	3	3	3	3	1	3	3	3	3	1	3	3	3	3	3	3	1
wsnp_BE494527A_Ta_2_1	1A	344	1	1	1	1	1	1	1	1	3	1	1	1	3	3	1	1	3	1	3	1	3	1	1	1	1	1	1	1	1	1	1	1	1	1	3	3	3	1	1	1	1	1	1	3	1	3	1
BobWhite_rep_c65812_710	1A	344.08	3	1	3	3	3	1	3	3	1	3	3	NA	1	1	3	3	1	3	1	3	1	NA	3	3	3	3	3	3	3	3	3	3	3	1	1	1	1	3	3	3	1	3	3	1	3	1	3
IAAV3156	1A	344.08	1	3	1	1	1	3	1	1	3	1	1	1	3	3	1	1	3	1	3	1	3	1	1	1	1	1	1	1	1	1	1	1	1	3	3	3	3	1	1	1	3	1	1	3	1	3	1
wsnp_CAP8_rep_c3938_1936666	1A	344.08	1	3	1	1	1	3	1	1	3	1	1	1	3	3	1	1	3	1	3	1	3	1	1	1	1	1	1	1	1	1	1	1	1	3	3	3	3	1	1	1	3	1	1	3	1	3	1
wsnp_JD_c4904_6034093	1A	344.08	1	3	1	1	1	3	1	1	3	1	1	1	3	3	1	1	3	1	3	1	3	1	1	1	1	1	1	1	1	1	1	1	1	3	3	3	3	1	1	1	3	1	1	3	1	3	1
Tdurum_contig5711_242	1A	344.32	1	1	1	1	1	1	1	1	1	1	1	1	1	3	1	1	1	1	3	1	1	1	1	1	1	1	1	1	1	1	1	1	1	1	1	3	1	1	1	1	1	1	1	3	1	1	1
BS00070580_51	1A	344.45	3	3	3	3	3	3	3	3	3	3	3	3	3	3	3	3	3	3	3	3	3	3	3	3	1	3	3	3	3	3	3	3	3	3	1	3	3	3	3	1	3	3	3	3	3	3	3
Excalibur_c63671_90	1A	344.45	3	1	3	3	3	1	3	3	3	3	3	3	3	3	3	3	3	3	3	3	3	3	3	3	3	3	3	3	3	3	3	3	3	1	3	3	3	3	3	3	3	3	3	3	3	3	3
RAC875_rep_c112241_279	1A	344.45	3	3	3	3	3	3	3	3	3	3	3	3	3	3	3	3	3	3	3	3	3	3	3	3	3	3	3	3	3	3	3	3	3	3	3	3	3	3	3	3	1	3	3	3	3	3	3
Tdurum_contig15967_90	1A	344.45	3	3	3	3	3	3	3	3	3	3	3	3	3	1	3	3	3	3	1	3	3	3	3	3	3	3	3	3	3	3	3	3	3	3	3	1	3	3	3	3	3	3	3	1	3	3	3
Tdurum_contig63715_235	1A	344.45	1	1	1	1	1	1	1	1	3	1	1	1	3	3	1	1	3	1	3	1	3	1	1	1	1	1	1	1	1	1	1	1	1	1	3	3	3	1	1	1	1	1	1	3	1	3	1
wsnp_Ex_rep_c81556_76277906	1A	344.45	3	3	3	3	3	3	3	3	3	3	3	3	3	3	3	3	3	3	3	3	3	3	3	3	3	3	3	3	3	3	3	3	3	3	3	3	3	3	3	3	3	3	3	3	3	3	3
wsnp_Ku_c3804_6986527	1A	344.45	1	3	1	1	1	3	1	1	3	1	1	1	3	1	1	1	3	1	1	1	3	1	1	1	1	1	1	1	1	1	1	1	1	3	3	1	3	1	1	1	3	1	1	1	1	3	1
Excalibur_c60388_189	1A	345.57	3	1	3	3	3	1	3	3	3	3	3	3	3	1	3	3	3	3	1	3	3	3	3	3	3	3	3	3	3	3	3	3	3	1	3	1	3	3	3	3	3	3	3	1	3	3	3
Excalibur_c1936_1072	1A	349.52	3	1	3	3	3	1	3	3	3	3	3	3	1	3	3	3	1	3	1	3	1	3	3	3	3	3	3	3	3	3	3	3	3	1	3	1	3	3	3	3	1	3	3	1	3	3	3
RAC875_rep_c69152_184	1A	349.52	3	1	3	3	3	1	3	3	1	3	3	3	1	1	3	3	1	3	1	3	1	3	3	3	3	3	3	3	3	3	3	3	3	1	1	1	1	3	3	3	1	3	3	1	3	1	3
RFL_Contig1493_657	1A	349.52	1	1	1	1	1	1	1	1	1	1	1	1	1	1	1	1	1	1	1	1	1	1	1	1	1	1	1	1	1	1	1	1	1	1	1	1	1	1	1	1	1	1	1	1	1	1	1
wsnp_CAP11_c29_68486	1A	349.52	1	1	1	1	1	1	1	1	1	1	1	1	1	1	1	1	1	1	1	1	1	1	1	1	1	1	1	1	1	1	1	1	1	1	1	1	1	1	1	1	3	1	1	1	1	1	1
BS00034899_51	1A	350.32	3	3	3	3	3	3	3	3	1	3	3	3	1	3	3	3	1	3	3	3	1	3	3	3	3	3	3	3	3	3	3	3	3	3	1	3	1	3	3	3	1	3	3	3	3	1	3
BS00056547_51	1A	350.32	3	1	3	3	3	1	3	3	1	3	3	3	1	1	3	3	1	3	1	3	1	3	3	3	3	3	3	3	3	3	3	3	3	1	1	1	1	3	3	3	1	3	3	1	3	1	3
Kukri_c35030_266	1A	350.32	3	3	3	3	3	3	3	3	1	3	3	3	3	1	3	3	3	3	3	3	3	3	3	3	3	3	3	3	3	3	3	3	3	3	1	3	1	3	3	3	3	3	3	3	3	1	3
BobWhite_rep_c49755_131	1A	351.3	1	3	1	1	1	3	1	1	3	1	1	1	3	3	1	1	1	1	3	1	3	1	1	1	1	1	1	1	1	1	1	1	1	3	3	3	3	1	1	1	1	1	1	3	1	3	1
BS00066212_51	1A	351.3	1	3	1	1	1	3	1	1	1	1	1	1	1	3	1	1	1	1	3	1	1	1	1	1	1	1	1	1	1	1	1	1	1	3	1	NA	1	1	1	1	1	1	1	3	1	1	1
BS00072408_51	1A	351.3	3	1	3	3	3	1	3	3	1	3	3	3	1	1	3	3	1	3	1	3	1	3	3	3	3	3	3	3	3	3	3	3	3	1	1	1	1	3	3	3	1	3	3	1	3	1	3
CAP12_c3758_112	1A	351.3	3	3	3	3	3	3	3	3	1	3	3	3	3	1	3	3	1	3	3	3	1	3	3	3	3	3	3	3	3	3	3	3	3	3	1	3	1	3	3	3	1	3	3	3	3	1	3
CAP7_c4277_191	1A	351.3	3	1	3	3	3	1	3	3	1	3	3	3	1	1	3	3	1	3	1	3	1	3	3	3	3	3	3	3	3	3	3	3	3	1	1	1	1	3	3	3	1	3	3	1	3	1	3
Jagger_c468_53	1A	351.3	3	1	3	3	3	1	3	3	1	3	3	3	1	1	3	3	3	3	1	3	1	3	3	3	3	3	3	3	3	3	3	3	3	1	1	1	1	3	3	3	3	3	3	1	3	1	3
Kukri_c19653_1370	1A	351.3	1	3	1	1	1	3	1	1	1	1	1	1	1	3	1	1	1	1	3	1	1	1	1	1	1	1	1	1	1	1	1	1	1	3	1	3	1	1	1	1	1	1	1	3	1	1	1
Ra_c5683_2584	1A	351.3	1	1	1	1	1	1	1	1	1	1	1	1	1	1	1	1	3	1	1	1	3	1	1	1	1	1	1	1	1	1	1	1	1	1	1	1	1	1	1	1	3	1	1	1	1	1	1
RAC875_c16824_202	1A	351.3	3	3	3	3	3	3	3	3	3	3	3	3	3	3	3	3	1	3	3	3	3	3	3	3	3	3	3	3	3	3	3	3	3	3	3	3	3	3	3	3	1	3	3	3	3	3	3
Tdurum_contig18174_283	1A	351.3	1	3	1	1	1	3	1	1	3	1	1	1	3	3	1	1	3	1	3	1	3	1	1	1	1	1	1	1	1	1	1	1	1	3	3	3	3	1	1	1	3	1	1	3	1	3	1
Tdurum_contig57927_171	1A	351.3	3	3	3	3	3	3	3	3	3	3	3	3	3	3	3	3	3	3	3	3	3	3	3	3	3	3	3	1	3	3	1	3	3	3	3	3	3	3	3	3	3	3	3	3	3	3	3
Tdurum_contig78830_348	1A	351.3	3	1	3	3	3	1	3	3	1	3	3	3	1	1	3	3	1	3	1	3	1	3	3	3	3	3	3	3	3	3	3	3	3	1	1	1	1	3	3	3	1	3	3	1	3	1	3
wsnp_CAP7_rep_c5385_2417464	1A	351.3	1	3	1	1	1	3	1	1	3	1	1	1	3	3	1	1	3	1	3	1	3	1	1	1	1	1	1	1	1	1	1	1	1	3	3	3	3	1	1	1	3	1	1	3	1	3	1
wsnp_Ex_c23598_32826926	1A	351.3	3	1	3	3	3	1	3	3	1	3	3	3	1	1	3	3	1	3	1	3	1	3	3	3	3	3	3	3	3	3	3	3	3	1	1	1	1	3	3	3	1	3	3	1	3	1	3
wsnp_Ex_c34594_42877243	1A	351.3	1	3	1	1	1	3	1	1	3	1	1	1	3	3	1	1	3	1	3	1	3	1	1	1	1	1	1	1	1	1	1	1	1	3	3	3	3	1	1	1	3	1	1	3	1	3	1
wsnp_Ex_c6488_11266589	1A	351.3	3	1	3	3	3	1	3	3	1	3	3	3	1	1	3	3	3	3	1	3	1	3	3	3	3	3	3	3	3	3	3	3	3	1	1	1	1	3	3	3	1	3	3	1	3	1	3
wsnp_Ra_c4184_7637695	1A	351.3	1	3	1	1	1	3	1	1	3	1	1	1	3	3	1	1	3	1	3	1	3	1	1	1	1	1	1	1	1	1	1	1	1	3	3	3	3	1	1	1	3	1	1	3	1	3	1
BS00066659_51	1A	351.43	1	3	1	1	1	3	1	1	3	1	1	NA	3	3	1	1	3	1	3	1	3	1	1	1	1	1	1	1	1	1	1	1	1	3	3	3	3	1	1	1	3	1	1	3	1	3	1
Kukri_c67703_174	1A	351.43	3	1	3	3	3	1	3	3	1	3	3	3	1	1	3	3	1	3	1	3	1	3	3	3	3	3	3	3	3	3	3	3	3	1	1	1	1	3	3	3	1	3	3	1	3	1	3
Kukri_c82086_387	1A	351.43	1	3	1	1	1	3	1	1	1	1	1	1	1	3	1	1	3	1	3	1	1	1	1	1	1	1	1	1	1	1	1	1	1	3	1	3	1	1	1	1	3	1	1	3	1	1	1
RAC875_c21673_641	1A	351.43	1	3	1	1	1	3	1	1	3	1	1	1	3	3	1	1	3	1	3	1	3	1	1	1	1	1	1	1	1	1	1	1	1	3	3	3	3	1	1	1	3	1	1	3	1	3	1
RFL_Contig399_976	1A	351.43	3	1	3	3	3	1	3	3	1	3	3	3	1	1	3	3	3	3	1	3	1	3	3	3	3	3	3	3	3	3	3	3	3	1	1	1	1	3	3	3	3	3	3	1	3	1	3
Tdurum_contig78830_745	1A	351.43	1	3	1	1	1	3	1	1	3	1	1	1	3	3	1	1	3	1	3	1	3	1	1	1	1	1	1	1	1	1	1	1	1	3	3	3	3	1	1	1	3	1	1	3	1	3	1
BobWhite_c20553_568	1A	356.3	1	3	1	1	1	3	1	1	1	1	1	1	1	3	1	1	3	1	3	1	3	1	1	1	1	1	1	1	1	1	1	1	1	3	1	3	1	1	1	1	3	1	1	3	1	1	1
BobWhite_c46857_82	1A	356.3	1	3	1	1	1	3	1	1	3	1	1	1	3	3	1	1	3	1	3	1	3	1	1	1	1	1	1	1	1	1	1	1	1	3	3	3	3	1	1	1	3	1	1	3	1	3	1
Excalibur_c30974_65	1A	356.3	1	3	1	1	1	3	1	1	3	1	1	1	3	3	1	1	3	1	3	1	3	1	1	1	1	1	1	1	1	1	1	1	1	3	3	3	3	1	1	1	3	1	1	3	1	3	1
Excalibur_c66_147	1A	356.3	3	1	3	3	1	1	3	1	1	3	3	3	1	1	3	3	3	3	1	3	1	3	3	3	3	3	3	3	3	3	3	3	3	1	1	1	1	3	3	3	1	3	3	1	3	1	3
JD_c285_1438	1A	356.3	3	3	3	3	3	3	3	3	1	3	3	3	1	3	3	3	1	3	3	3	1	3	3	3	3	3	3	3	3	3	3	3	3	3	1	3	1	3	3	3	1	3	3	3	3	1	3
Kukri_c47131_569	1A	356.3	1	3	1	1	1	3	1	1	1	1	1	1	1	3	1	1	3	1	3	1	3	1	1	1	1	1	1	1	1	1	1	1	1	3	1	3	1	1	1	1	3	1	1	3	1	1	1
Ra_c5683_1762	1A	356.3	1	3	1	1	1	3	1	1	1	1	1	NA	1	3	1	1	3	1	3	1	3	1	1	1	1	1	1	1	1	1	1	1	1	3	1	3	1	1	1	1	3	1	1	3	1	1	1
RAC875_rep_c108284_98	1A	356.3	3	1	3	3	3	1	3	3	1	3	3	3	1	1	3	3	1	3	1	3	1	3	3	3	3	3	3	3	3	3	3	3	3	1	1	1	1	3	3	3	1	3	3	1	3	1	3
Tdurum_contig12152_63	1A	356.3	3	1	3	3	3	1	3	3	3	3	3	3	3	1	3	3	1	3	1	3	1	3	3	3	3	3	3	3	3	3	3	3	3	1	3	1	3	3	3	3	1	3	3	1	3	3	3
Tdurum_contig80278_250	1A	356.3	1	3	1	1	1	3	1	1	3	1	1	1	3	3	1	1	3	1	3	1	3	1	1	1	1	1	1	1	1	1	1	1	1	3	3	3	3	1	1	1	3	1	1	3	1	3	1
Tdurum_contig81011_244	1A	356.3	3	1	3	3	1	1	3	1	1	3	3	3	1	1	3	3	3	3	1	3	1	3	3	3	3	3	3	3	3	3	3	3	3	1	1	1	1	3	3	3	1	3	3	1	3	1	3
Tdurum_contig81642_298	1A	356.3	1	3	1	1	1	3	1	1	3	1	1	1	3	3	1	1	3	1	3	1	3	1	1	1	1	1	1	1	1	1	1	1	1	3	3	3	3	1	1	1	3	1	1	3	1	3	1
tplb0031l06_747	1A	356.3	1	3	1	1	1	3	1	1	1	1	1	1	1	3	1	1	3	1	3	1	3	1	1	1	1	1	1	1	1	1	1	1	1	3	1	3	1	1	1	1	3	1	1	3	1	1	1
wsnp_CAP11_c146_160903	1A	356.3	3	1	3	3	1	1	3	1	1	3	3	3	1	1	3	3	3	3	1	3	1	3	3	3	3	3	3	3	3	3	3	3	3	1	1	1	1	3	3	3	1	3	3	1	3	1	3
wsnp_Ex_c13955_21833712	1A	356.3	1	3	1	1	1	3	1	1	3	1	1	1	3	3	1	1	3	1	3	1	3	1	1	1	1	1	1	1	1	1	1	1	1	3	3	3	3	1	1	1	3	1	1	3	1	3	1
wsnp_Ex_c19353_28290393	1A	356.3	1	3	1	1	1	3	1	1	1	1	1	1	1	3	1	1	3	1	3	1	3	1	1	1	1	1	1	1	1	1	1	1	1	3	1	3	1	1	1	1	3	1	1	3	1	1	1
wsnp_Ex_c19353_28290651	1A	356.3	1	3	1	1	1	3	1	1	1	1	1	1	1	3	1	1	3	1	3	1	3	1	1	1	1	1	1	1	1	1	1	1	1	3	1	3	1	1	1	1	3	1	1	3	1	1	1
wsnp_Ex_c23143_32376622	1A	356.3	1	3	1	1	1	3	1	1	3	1	1	1	3	3	1	1	3	1	3	1	3	1	1	1	1	1	1	1	1	1	1	1	1	3	3	3	3	1	1	1	3	1	1	3	1	3	1
wsnp_JD_c20553_18260731	1A	357.09	1	3	1	1	1	3	1	1	1	1	1	1	1	3	1	1	3	1	3	1	3	1	1	1	1	1	1	1	1	1	1	1	1	3	1	3	1	1	1	1	3	1	1	3	1	1	1
BobWhite_c37358_208	1A	357.33	3	3	3	3	3	3	3	3	1	3	3	3	3	1	3	3	1	3	3	3	1	3	3	3	3	3	3	3	3	3	3	3	3	3	1	3	1	3	3	3	1	3	3	3	3	1	3
CAP12_rep_c6128_120	1A	357.33	3	3	3	3	3	3	3	3	3	3	3	3	3	1	3	3	3	3	3	3	3	3	3	3	3	3	3	3	3	3	3	3	3	3	3	3	3	3	3	3	3	3	3	3	3	3	3
Excalibur_c21534_1436	1A	357.33	1	3	1	1	1	3	1	1	3	1	1	1	3	3	1	1	3	1	3	1	3	1	1	1	1	1	1	1	1	1	1	1	1	3	3	3	3	1	1	1	3	1	1	3	1	3	1
JD_c20553_448	1A	357.33	3	3	3	3	3	3	3	3	3	3	3	3	3	3	3	3	1	3	3	3	1	3	3	3	3	3	3	3	3	3	3	3	3	3	3	3	3	3	3	3	1	3	3	3	3	3	3
Ku_c3523_1959	1A	357.33	1	3	1	1	1	3	1	1	1	1	1	1	1	3	1	1	1	1	3	1	1	1	1	1	1	1	1	1	1	1	1	1	1	3	1	3	1	1	1	1	1	1	1	3	1	1	1
Kukri_c14635_73	1A	357.33	3	3	3	3	3	3	3	3	3	3	3	3	3	3	3	3	1	3	3	3	1	3	3	3	3	3	3	3	3	3	3	3	3	3	3	3	3	3	3	3	1	3	3	3	3	3	3
Kukri_c51781_199	1A	357.33	3	1	3	3	3	1	3	3	3	3	3	3	1	1	3	3	1	3	1	3	1	3	3	3	3	3	3	3	3	3	3	3	3	1	3	1	3	3	3	3	3	3	3	1	3	3	3
Ra_c41164_730	1A	357.33	1	1	1	1	1	1	1	1	1	1	1	NA	1	NA	1	1	3	1	1	1	3	1	1	1	1	1	1	1	1	1	1	1	1	1	1	1	1	1	1	1	3	1	1	1	1	1	1
wsnp_JD_c20553_18260620	1A	357.33	3	3	3	3	3	3	3	3	3	3	3	3	3	3	3	3	1	3	3	3	1	3	3	3	3	3	3	3	3	3	3	3	3	3	3	3	3	3	3	3	1	3	3	3	3	3	3
wsnp_JD_rep_c49006_33254974	1A	357.33	1	1	1	1	1	1	1	1	3	1	1	1	1	3	1	1	1	1	1	1	1	1	1	1	1	1	1	1	1	1	1	1	1	1	3	1	3	1	1	1	3	1	1	1	1	3	1
Ku_c4369_351	1A	358.75	3	3	3	3	3	3	3	3	3	3	3	3	3	3	3	3	1	3	3	3	1	3	3	3	3	3	3	3	3	3	3	3	3	3	3	3	3	3	3	3	1	3	3	3	3	3	3
Tdurum_contig11106_264	1A	363.8	3	3	3	3	3	3	3	3	3	3	3	3	3	3	3	3	3	3	3	3	1	3	3	3	3	3	3	3	3	3	3	3	3	3	3	3	3	3	3	3	3	3	3	3	3	3	3
Tdurum_contig11106_340	1A	363.8	3	3	3	3	3	3	3	3	3	3	3	3	3	3	3	3	3	3	3	3	1	3	3	3	3	3	3	3	3	3	3	3	3	3	3	3	3	3	3	3	3	3	3	3	3	3	3
wsnp_Ex_rep_c68171_66944702	1A	365.2	3	1	3	3	3	1	3	3	3	3	3	3	3	3	3	3	3	3	3	3	3	3	3	3	3	3	3	3	3	3	3	3	3	1	3	1	3	3	3	3	1	3	3	3	3	3	3
BobWhite_c5242_400	1A	366.92	3	1	3	3	3	1	3	3	3	3	3	3	3	3	3	3	3	3	3	3	3	3	3	3	3	3	3	3	3	3	3	3	3	1	3	1	3	3	3	3	1	3	3	3	3	3	3
Ra_c8027_1021	1A	366.92	3	1	3	3	3	1	3	3	1	3	3	3	1	1	3	3	1	3	1	3	1	3	3	3	3	3	3	3	3	3	3	3	3	1	1	1	1	3	3	3	1	3	3	1	3	1	3
RAC875_c49433_308	1A	366.92	3	1	3	3	3	1	3	3	1	3	3	3	1	1	3	3	1	3	1	3	1	3	3	3	3	3	3	3	3	3	3	3	3	1	1	1	1	3	3	3	1	3	3	1	3	1	3
RAC875_c7563_273	1A	366.92	3	3	3	3	3	3	3	3	3	3	3	3	3	3	3	3	3	3	3	3	1	3	3	3	3	3	3	3	3	3	3	3	3	3	3	3	3	3	3	3	3	3	3	3	3	3	3
TA002362.0785	1A	366.92	3	1	3	3	3	1	3	3	3	3	3	3	3	3	3	3	3	3	3	3	3	3	3	3	3	3	3	3	3	3	3	3	3	1	3	1	3	3	3	3	1	3	3	3	3	3	3
wsnp_BF474340A_Ta_2_1	1A	366.92	3	1	3	3	3	1	3	3	3	3	3	3	3	3	3	3	3	3	3	3	3	3	3	3	3	3	3	3	3	3	3	3	3	1	3	1	3	3	3	3	1	3	3	3	3	3	3
wsnp_Ex_c30552_39457767	1A	366.92	3	1	3	3	3	1	3	3	3	3	3	3	3	3	3	3	3	3	3	3	3	3	3	3	3	3	3	3	3	3	3	3	3	1	3	1	3	3	3	3	1	3	3	3	3	3	3
wsnp_Ku_rep_c109724_94227136	1A	386.5	1	1	1	1	1	1	1	1	1	1	1	1	1	3	1	1	3	1	1	1	3	1	1	1	1	1	1	1	1	1	1	1	1	1	1	1	1	1	1	1	3	1	1	1	1	1	1
Excalibur_c16947_81	1A	394.41	1	3	1	1	1	3	1	1	3	1	1	1	3	3	1	1	1	1	3	1	1	1	1	1	1	1	1	1	1	1	1	1	1	3	3	3	3	1	1	1	3	1	1	3	1	3	1
Kukri_c8757_107	1A	394.41	1	1	1	1	1	1	1	1	1	1	1	1	1	1	1	1	3	1	1	1	3	1	1	1	1	1	1	1	1	1	1	1	1	1	1	1	1	1	1	1	1	1	1	1	1	1	1
RAC875_c34515_343	1A	394.41	3	3	3	3	3	3	3	3	3	3	3	3	3	3	3	3	1	3	3	3	1	3	3	3	3	3	3	3	3	3	3	3	3	3	3	3	3	3	3	3	3	3	3	3	3	3	3
Tdurum_contig51167_915	1A	394.41	3	3	3	3	3	3	3	3	3	3	3	3	3	1	3	3	3	3	3	3	3	3	3	3	3	3	3	3	3	3	3	3	3	3	3	3	3	3	3	3	3	3	3	3	3	3	3
wsnp_Ra_c19637_28840370	1A	394.41	1	3	1	1	1	3	1	1	3	1	1	1	3	3	1	1	1	1	3	1	1	1	1	1	1	1	1	1	1	1	1	1	1	3	3	3	3	1	1	1	3	1	1	3	1	3	1
Tdurum_contig51167_390	1A	394.96	3	3	3	3	3	3	3	3	3	3	3	3	3	1	3	3	3	3	3	3	3	3	3	3	3	3	3	3	3	3	3	3	3	3	3	3	3	3	3	3	3	3	3	3	3	3	3
Jagger_c6772_80	1A	397.53	1	3	1	1	1	3	1	1	3	1	1	1	3	3	1	1	1	1	3	1	1	1	1	1	1	1	1	1	1	1	1	1	1	3	3	3	3	1	1	1	1	1	1	3	1	3	1
BobWhite_c15256_225	1A	401.68	3	1	3	3	3	1	3	3	1	3	3	3	1	1	3	3	3	3	1	3	3	3	3	3	3	3	3	3	3	3	3	3	3	1	1	1	1	3	3	3	1	3	3	1	3	1	3
BobWhite_c19182_280	1A	401.68	3	1	3	3	3	1	3	3	1	3	3	3	1	1	3	3	3	3	1	3	3	3	3	3	3	3	3	3	3	3	3	3	3	1	1	1	1	3	3	3	1	3	3	1	3	1	3
BS00067119_51	1A	401.68	1	3	1	1	1	3	1	1	1	1	1	1	1	3	1	1	1	1	3	1	1	1	1	1	1	1	1	1	1	1	1	1	1	3	1	3	1	1	1	1	1	1	1	3	1	1	1
CAP7_c821_239	1A	401.68	1	1	1	1	1	1	1	1	3	1	1	1	1	1	1	1	1	1	1	1	3	1	1	1	1	1	1	1	1	1	1	1	1	1	3	1	3	1	1	1	3	1	1	1	1	3	1
Excalibur_c16947_114	1A	401.68	3	1	3	3	3	1	3	3	1	3	3	3	1	1	3	3	3	3	1	3	3	3	3	3	3	3	3	3	3	3	3	3	3	1	1	1	1	3	3	3	1	3	3	1	3	1	3
Excalibur_c23598_1502	1A	401.68	1	1	1	1	1	1	1	1	3	1	1	1	1	3	1	1	1	1	1	1	1	1	1	1	1	1	1	1	1	1	1	1	1	1	3	1	3	1	1	1	3	1	1	1	1	3	1
Excalibur_c73970_243	1A	401.68	1	1	1	1	1	1	1	1	1	1	1	1	1	3	1	1	1	1	1	1	1	1	1	1	1	1	1	1	1	1	1	1	1	1	1	1	1	1	1	1	1	1	1	1	1	1	1
IAAV3695	1A	401.68	1	3	3	1	1	3	1	1	3	3	1	1	3	3	1	1	3	3	3	1	3	3	3	1	1	1	1	1	1	1	1	1	1	3	3	3	3	1	1	1	3	1	1	3	1	3	1
Kukri_c16271_544	1A	401.68	1	3	1	1	1	3	1	1	1	1	1	1	3	3	1	1	1	1	3	1	1	1	1	1	1	1	1	1	1	1	1	1	1	3	1	3	1	1	1	1	1	1	1	3	1	1	1
Kukri_c16271_894	1A	401.68	3	1	3	3	3	1	3	3	3	3	3	3	1	3	3	3	3	3	1	3	3	3	3	3	3	3	3	3	3	3	3	3	3	1	3	1	3	3	3	3	3	3	3	1	3	3	3
Ra_c71093_408	1A	401.68	1	1	1	1	1	1	1	1	3	1	1	1	1	1	1	1	1	1	1	1	1	1	1	1	1	1	1	1	1	1	1	1	1	1	3	1	3	1	1	1	3	1	1	1	1	3	1
RAC875_c23586_541	1A	401.68	3	3	3	3	3	3	3	3	3	3	3	3	3	1	3	3	3	3	3	3	3	3	3	3	3	3	3	3	3	3	3	3	3	3	3	3	3	3	3	3	3	3	3	3	3	3	3
RAC875_c36089_179	1A	401.68	3	3	3	3	3	3	3	3	1	3	3	3	3	3	3	3	3	3	3	3	1	3	3	3	3	3	3	3	3	3	3	3	3	3	1	3	1	3	3	3	1	3	3	3	3	1	3
RAC875_c59190_384	1A	401.68	1	3	1	1	1	3	1	1	3	1	1	1	3	1	1	1	1	1	3	1	1	1	1	1	1	1	1	1	1	1	1	1	1	3	3	3	3	1	1	1	3	1	1	3	1	3	1
RAC875_rep_c106165_772	1A	401.68	3	3	3	3	3	3	3	3	1	3	3	3	3	3	3	3	3	3	3	3	3	3	3	3	3	3	3	3	3	3	3	3	3	3	1	3	1	3	3	3	1	3	3	3	3	1	3
TA001430.0733	1A	401.68	1	3	1	1	1	3	1	1	3	1	1	1	3	3	1	1	1	1	3	1	1	1	1	1	1	1	1	1	1	1	1	1	1	3	3	3	3	1	1	1	3	1	1	3	1	3	1
Tdurum_contig34826_234	1A	401.68	3	3	3	3	3	3	3	3	3	3	3	3	3	3	3	3	3	3	3	3	3	3	3	3	3	3	3	3	3	3	3	3	3	3	3	3	3	3	3	3	3	3	3	3	3	3	3
Tdurum_contig51167_810	1A	401.68	1	1	1	1	1	1	1	1	1	1	1	1	1	3	1	1	1	1	1	1	1	1	1	1	1	1	1	1	1	1	1	1	1	1	1	1	1	1	1	1	1	1	1	1	1	1	1
wsnp_BE403322A_Ta_1_1	1A	401.68	3	3	3	3	3	3	3	3	3	3	3	3	3	3	3	3	3	3	3	3	3	3	3	3	3	3	3	3	3	3	3	3	3	3	3	3	3	3	3	3	3	3	3	3	3	3	3
wsnp_Ex_c28149_37293173	1A	401.68	1	3	1	1	1	3	1	1	1	1	1	1	1	3	1	1	1	1	3	1	1	1	1	1	1	1	1	1	1	1	1	1	1	3	1	3	1	1	1	1	1	1	1	3	1	1	1
RAC875_c36980_161	1A	401.86	1	3	1	1	1	3	1	1	1	1	1	1	3	3	1	1	1	1	3	1	1	1	1	1	1	1	1	1	1	1	1	1	1	3	1	3	1	1	1	1	1	1	1	3	1	1	1
Kukri_c24753_460	1A	402.42	1	3	1	1	1	3	1	1	3	1	1	1	3	1	1	1	1	1	3	1	1	1	1	1	1	1	1	1	1	1	1	1	1	3	3	3	3	1	1	1	3	1	1	3	1	3	1
RAC875_rep_c71093_1070	1A	404.32	1	1	1	1	1	1	1	1	3	1	1	1	1	3	1	1	1	1	1	1	1	1	1	1	1	1	1	1	1	1	1	1	1	1	3	1	3	1	1	1	3	1	1	1	1	3	1
CAP12_c8163_118	1A	406.05	3	3	3	3	3	3	3	3	3	3	3	3	3	1	3	3	1	3	3	3	1	3	3	3	3	3	3	3	3	3	3	3	3	3	3	3	3	3	3	3	3	3	3	3	3	3	3
RAC875_c48804_590	1A	406.05	3	3	3	3	3	3	3	3	3	3	3	3	3	1	3	3	3	3	3	3	3	3	3	3	3	3	3	3	3	3	3	3	3	3	3	3	3	3	3	3	3	3	3	3	3	3	3
Kukri_c2338_533	1A	406.22	3	3	3	3	3	3	3	3	1	3	3	3	3	1	3	3	3	3	3	3	3	3	3	3	3	3	3	3	3	3	3	3	3	3	1	3	1	3	3	3	1	3	3	3	3	1	3
wsnp_Ex_c7684_13109335	1A	406.22	3	3	3	3	3	3	3	3	1	3	3	3	3	1	3	3	3	3	3	3	3	3	3	3	3	3	3	3	3	3	3	3	3	3	1	3	1	3	3	3	1	3	3	3	3	1	3
Excalibur_c88792_93	1A	411.15	1	3	1	1	1	3	1	1	1	1	3	1	3	3	1	1	1	1	3	1	1	1	1	1	1	1	1	1	1	1	1	1	1	3	1	3	1	1	1	1	1	1	1	3	1	1	1
Kukri_rep_c109145_695	1A	411.15	1	3	1	1	1	3	1	1	1	1	1	1	3	1	1	1	1	1	3	1	1	1	1	1	1	1	1	1	1	1	1	1	1	3	1	3	1	1	1	1	1	1	1	3	1	1	1
RFL_Contig3683_1784	1A	411.15	3	1	3	3	3	1	3	3	3	3	1	3	1	1	3	3	3	3	1	3	3	3	3	3	3	3	3	3	3	3	3	3	3	1	3	1	3	3	3	3	3	3	3	1	3	3	3
wsnp_Ex_c10631_17340809	1A	411.15	3	1	3	3	3	1	3	3	3	3	1	3	1	NA	3	3	3	3	1	3	3	3	3	3	3	3	3	3	3	3	3	3	3	1	3	1	3	3	3	3	3	3	3	1	3	3	3
GENE.3098_53	1A	411.61	3	1	3	3	3	1	3	3	3	3	1	3	1	1	3	3	3	3	1	3	3	3	3	3	3	3	3	3	3	3	3	3	3	1	3	1	3	3	3	3	3	3	3	1	3	3	3
wsnp_BE591290B_Ta_2_7	1A	411.61	1	1	1	1	1	1	1	3	1	1	1	1	1	1	1	1	1	1	1	1	1	1	1	1	1	1	1	1	1	1	1	1	1	1	1	1	1	1	1	1	1	1	1	1	1	1	1
Excalibur_c17320_833	1A	414.53	1	1	1	1	1	1	1	1	1	1	1	1	1	1	1	1	1	1	1	1	1	1	1	1	1	1	1	1	1	1	1	1	1	1	1	1	1	1	1	1	3	1	1	1	1	1	1
Excalibur_rep_c101018_254	1A	414.53	3	3	3	3	3	3	3	3	3	3	3	3	3	3	3	3	3	3	3	3	3	3	3	3	3	3	3	3	3	3	3	3	3	3	3	3	3	3	3	3	1	3	3	3	3	3	3
RAC875_c1599_342	1A	414.53	1	3	1	1	1	1	1	1	1	1	3	1	3	1	1	1	1	1	3	1	1	3	1	1	1	1	1	1	1	1	1	1	1	3	1	3	1	1	1	1	3	1	1	3	1	1	1
BobWhite_c31322_391	1A	415.45	3	3	3	3	3	3	3	3	3	3	3	3	3	3	3	3	3	3	3	3	3	3	3	3	3	3	3	3	3	3	3	3	3	3	3	3	3	3	3	3	3	3	3	3	3	3	3
BobWhite_c6664_644	1A	415.45	3	1	3	3	3	3	3	3	3	3	1	3	1	3	3	3	3	3	1	3	3	3	3	3	3	3	3	3	3	3	3	3	3	1	3	1	3	3	3	3	1	3	3	1	3	3	3
wsnp_JD_c6664_7807201	1A	415.71	3	1	3	3	3	3	3	3	3	3	1	3	1	3	3	3	3	3	1	3	3	3	3	3	3	3	3	3	3	3	3	3	3	1	3	1	3	3	3	3	1	3	3	1	3	3	3
BobWhite_c39668_143	1A	418.4	3	1	3	3	3	3	3	3	3	3	1	3	3	3	1	3	3	3	1	3	3	1	3	3	3	3	3	3	3	3	3	3	3	1	3	1	3	3	3	3	3	3	3	1	3	3	3
BS00106641_51	1A	423.4	1	1	1	1	1	1	1	1	1	1	1	1	1	1	1	1	1	1	1	1	1	1	1	1	1	1	1	1	1	1	1	1	1	1	1	1	1	1	1	1	1	1	1	1	1	1	1
RAC875_c53725_217	1A	423.4	1	3	1	1	1	1	3	1	1	1	3	1	1	3	3	1	1	3	1	1	3	3	1	1	1	1	1	3	1	1	3	3	1	3	3	1	1	3	1	1	3	1	1	1	3	3	3
wsnp_Ex_c18499_27344859	1A	423.4	3	3	3	3	3	3	3	3	3	3	3	3	3	3	3	3	3	3	3	3	3	3	3	3	3	3	3	3	3	3	3	3	3	3	3	3	3	3	3	3	3	3	3	3	3	3	3
wsnp_Ex_c3201_5910642	1A	423.4	3	3	3	3	1	1	3	1	1	3	3	3	1	3	3	1	1	3	1	3	1	3	1	3	1	3	1	3	3	3	3	3	1	3	3	3	1	3	3	3	3	1	3	1	3	3	3
BS00023114_51	1A	423.66	3	3	3	3	3	3	3	3	3	3	3	3	3	3	3	3	3	3	3	3	3	3	3	3	3	3	3	3	3	3	3	3	3	3	3	3	3	3	3	3	3	3	3	3	3	3	3
BS00043441_51	1A	423.66	3	3	3	3	3	3	3	3	3	3	3	3	3	3	3	3	3	3	1	3	3	3	3	3	3	3	3	3	3	3	3	3	3	3	3	1	3	3	3	3	3	1	3	1	3	3	3
wsnp_Ex_c9343_15514531	1A	423.66	1	3	1	1	1	1	3	1	1	1	3	1	1	3	3	1	1	3	1	1	3	3	1	1	1	1	1	3	1	1	3	3	1	3	3	1	1	3	1	1	3	1	1	1	3	3	3
wsnp_Ex_c9343_15514687	1A	423.66	3	1	3	3	3	3	1	3	3	3	1	3	3	1	1	3	3	1	3	3	1	1	3	3	3	3	3	1	3	3	1	1	3	1	1	3	3	1	3	3	1	3	3	3	1	1	1
wsnp_Ku_c14496_22838796	1A	423.66	3	3	3	3	3	3	3	3	3	3	3	1	3	3	3	3	3	1	3	3	3	3	3	3	3	3	3	3	3	3	3	3	3	3	3	3	3	1	3	3	1	3	3	3	1	3	3
BS00022824_51	1A	425.16	1	1	1	1	3	3	1	3	3	1	1	1	3	1	1	1	1	1	1	1	1	1	1	1	1	1	1	1	1	1	1	1	3	1	1	1	3	1	1	1	1	1	1	1	1	1	1
RAC875_c62550_470	1A	430.97	NA	1	1	1	3	3	1	3	1	1	1	1	1	3	3	3	1	3	1	1	3	3	1	1	NA	1	1	3	1	1	3	3	NA	1	3	1	1	3	NA	3	1	1	1	NA	3	3	1
BS00011521_51	1A	431.5	3	3	3	3	1	1	3	1	1	3	3	3	1	1	3	1	1	3	1	3	1	3	1	3	1	3	1	3	3	3	3	3	1	3	3	3	1	3	3	3	3	1	3	1	3	3	3
BS00021990_51	1A	431.5	3	1	1	3	3	3	3	3	3	3	1	1	3	1	3	3	3	3	1	3	3	3	3	3	3	3	3	3	3	3	3	3	3	1	1	3	3	3	3	1	1	1	3	1	3	1	3
BS00067741_51	1A	431.5	3	1	1	3	1	1	3	1	3	3	1	NA	1	1	1	3	3	3	1	3	3	1	1	1	1	3	3	1	3	3	1	1	3	1	1	1	3	1	3	1	1	3	3	1	1	1	3
Excalibur_c1255_293	1A	431.5	1	3	3	1	3	3	1	3	1	1	3	3	3	3	3	1	1	1	3	1	1	3	3	3	3	1	1	3	1	1	3	3	1	3	3	3	1	3	1	3	3	1	1	3	3	3	1
GENE.0171_87	1A	431.5	3	3	3	3	1	3	3	3	1	3	3	3	1	3	3	1	1	3	3	3	1	3	1	3	1	3	1	3	3	3	3	3	1	3	3	1	1	3	3	3	3	1	3	3	3	3	3
Kukri_c310_1953	1A	431.5	1	1	1	1	3	1	1	1	3	1	1	1	3	1	1	3	3	1	1	1	3	1	3	1	3	1	3	1	1	1	1	1	3	1	1	3	3	1	1	1	1	1	1	1	1	1	1
wsnp_Ex_c11939_19147790	1A	431.5	3	3	3	3	3	1	1	1	3	3	3	3	3	3	1	3	3	1	3	3	3	1	3	3	3	3	3	1	3	3	1	1	3	3	3	3	3	1	3	3	3	3	3	3	1	3	1
wsnp_Ex_c1557_2973321	1A	431.5	1	1	1	1	1	3	3	3	1	1	1	1	1	1	3	1	1	3	1	1	1	3	1	1	1	1	1	3	1	1	3	3	1	1	1	1	1	3	1	1	1	1	1	1	3	1	3
wsnp_Ex_c271_521429	1A	431.5	3	1	1	3	3	3	3	3	3	3	1	1	3	1	3	3	3	3	1	3	3	3	3	3	3	3	3	3	3	3	3	3	3	1	1	3	3	3	3	1	1	1	3	1	3	1	3
wsnp_Ex_c48407_53323483	1A	431.5	3	3	3	3	1	1	3	1	1	3	3	3	1	3	3	1	1	3	3	3	1	3	1	3	1	3	1	3	3	3	3	3	1	3	3	3	1	3	3	3	3	1	3	3	3	3	3
wsnp_Ex_c25730_34991010	1A	432.04	1	1	1	1	1	1	1	1	1	1	1	NA	1	1	1	1	1	1	1	1	1	1	1	1	1	1	1	1	1	1	1	1	1	1	1	3	1	1	1	1	1	3	1	1	1	1	1
wsnp_Ex_rep_c68058_66805898	1A	432.04	3	3	3	3	3	3	3	3	3	3	3	3	3	3	3	3	3	3	3	3	3	3	3	3	3	3	3	3	3	3	3	3	3	3	3	1	3	3	3	3	3	1	3	3	3	3	3
Kukri_c65610_572	1A	432.07	1	1	1	1	1	3	3	3	1	1	1	1	1	1	3	1	1	3	1	1	1	3	1	1	1	1	1	3	1	1	3	3	1	1	1	1	1	3	1	1	1	1	1	1	3	1	3
RAC875_c52947_84	1A	432.07	3	3	3	3	3	1	1	1	3	3	3	3	3	3	1	3	3	1	3	3	3	1	3	3	3	3	3	1	3	3	1	1	3	3	3	3	3	1	3	3	3	3	3	3	1	3	1
Tdurum_contig70803_475	1A	432.07	1	3	3	1	1	1	1	1	1	1	3	3	1	1	1	1	1	1	3	1	1	1	1	1	1	1	1	1	1	1	1	1	1	3	3	1	1	1	1	1	3	1	1	3	1	3	1
Tdurum_contig84252_155	1A	432.07	1	1	1	1	1	3	3	3	1	1	1	1	1	1	3	1	1	3	1	1	1	3	1	1	1	1	1	3	1	1	3	3	1	1	1	1	1	3	1	1	1	1	1	1	3	1	3
BobWhite_c12305_959	1A	435.16	3	3	3	3	3	1	1	1	3	3	3	3	3	3	1	3	3	1	3	3	3	1	3	3	3	3	3	1	3	3	1	1	3	3	3	3	3	1	3	3	3	3	3	3	1	3	1
BS00107935_51	1A	435.16	3	1	1	3	3	1	1	1	3	3	1	1	3	3	1	3	3	1	1	3	3	NA	3	3	3	3	3	1	3	3	1	1	1	1	3	3	3	1	3	3	1	3	3	1	1	3	1
Excalibur_c10538_1153	1A	435.16	1	3	3	1	1	1	1	1	1	1	3	3	1	1	1	1	1	1	3	1	1	1	1	1	1	1	1	1	1	1	1	1	3	3	1	1	1	1	1	1	3	1	1	3	1	1	1
Excalibur_c85499_232	1A	435.16	1	1	1	1	1	3	1	3	1	1	1	1	1	1	3	1	1	3	1	1	1	3	1	1	1	1	1	3	1	1	3	3	1	1	1	1	1	3	1	1	1	1	1	1	3	1	1
IACX882	1A	435.16	3	3	3	3	3	3	3	3	1	3	3	3	3	3	3	3	1	3	3	3	3	3	3	3	3	3	1	3	3	3	3	3	1	3	3	3	1	3	3	3	3	3	3	3	3	3	3
Ku_c20664_262	1A	435.16	1	1	1	1	1	3	3	3	1	1	1	1	1	1	3	1	1	3	1	1	1	3	1	1	1	1	1	3	1	1	3	3	1	1	1	1	1	3	1	1	1	1	1	1	3	1	3
RAC875_c1295_1603	1A	435.16	3	1	1	3	3	1	1	1	3	3	1	1	3	3	1	3	3	1	1	3	3	1	3	3	3	3	3	1	3	3	1	1	1	1	3	3	3	1	3	3	1	3	3	1	1	3	1
Tdurum_contig29886_139	1A	435.16	1	3	3	1	1	1	1	1	1	1	3	3	1	1	1	1	1	1	3	1	1	1	1	1	1	1	1	1	1	1	1	1	3	3	1	1	1	1	1	1	3	1	1	3	1	1	1
Tdurum_contig30426_261	1A	435.16	3	1	1	3	3	1	1	1	3	3	1	1	3	3	1	3	3	1	1	3	3	1	3	3	3	3	3	1	3	3	1	1	1	1	3	3	3	1	3	3	1	3	3	1	1	3	1
wsnp_Ex_c11939_19147421	1A	435.16	1	3	3	1	1	1	1	1	1	1	3	3	1	1	1	1	1	1	3	1	1	1	1	1	1	1	1	1	1	1	1	1	3	3	1	1	1	1	1	1	3	1	1	3	1	1	1
wsnp_Ku_c12441_20092792	1A	435.16	1	3	3	1	1	1	1	1	1	1	3	3	1	1	1	1	1	1	3	1	1	1	1	1	1	1	1	1	1	1	1	1	3	3	1	1	1	1	1	1	3	1	1	3	1	1	1
wsnp_Ex_c11939_19147514	1A	437.02	3	1	1	3	3	3	3	3	3	3	1	1	3	3	3	3	3	3	1	3	3	3	3	3	3	3	3	3	3	3	3	3	1	1	3	3	3	3	3	3	1	3	3	1	3	3	3
wsnp_Ex_rep_c69932_68893867	1A	437.02	1	1	1	1	1	3	1	3	1	1	1	1	1	3	3	1	1	3	1	1	1	3	1	1	1	1	1	3	1	1	3	3	1	1	3	1	1	3	1	3	1	1	1	1	3	3	1
wsnp_JD_rep_c65095_41464278	1A	437.02	3	3	3	3	3	1	3	1	3	3	3	3	3	1	1	3	3	1	3	3	3	1	3	3	3	3	3	1	3	3	1	1	3	3	1	3	3	1	3	1	3	3	3	3	1	1	3
wsnp_Ku_rep_c69362_68705297	1A	437.02	1	1	1	1	1	3	1	3	1	1	1	1	1	3	3	1	1	3	1	1	1	3	1	1	1	1	1	3	1	1	3	3	1	1	3	1	1	3	1	3	1	1	1	1	3	3	1
BS00065170_51	1A	437.11	3	1	1	3	1	3	1	3	1	3	1	1	1	3	3	1	1	3	1	1	1	3	1	3	1	3	1	3	3	3	3	3	1	1	3	1	1	3	3	3	1	1	3	1	3	3	1
Kukri_c19837_432	1A	437.11	1	3	3	1	3	1	3	1	3	1	3	3	3	1	1	3	3	1	3	3	3	1	3	1	3	1	3	1	1	1	1	1	3	3	1	3	3	1	1	1	3	3	1	3	1	1	3
IAAV6100	1A	439.42	3	3	3	3	3	1	3	1	3	3	3	3	3	1	1	1	3	1	3	3	1	1	3	3	3	3	3	1	3	3	1	1	3	3	1	3	3	1	3	1	3	3	3	3	1	1	3
Kukri_c44201_497	1A	439.42	3	3	1	3	3	1	1	1	3	3	3	1	1	1	1	1	3	1	1	3	1	1	3	3	3	3	3	1	3	3	1	1	1	3	1	1	3	1	3	1	1	1	3	1	1	1	1
wsnp_Ex_c36911_44767554	1A	439.42	3	3	3	3	3	1	3	1	3	3	3	3	3	1	1	1	3	1	3	3	1	1	3	3	3	3	3	1	3	3	1	1	3	3	1	3	3	1	3	1	3	3	3	3	1	1	3
wsnp_Ex_rep_c103474_88421290	1A	439.42	3	3	3	3	3	1	3	1	3	3	3	3	3	1	1	1	3	1	3	3	1	1	3	3	3	3	3	1	3	3	1	1	3	3	1	3	3	1	3	1	3	3	3	3	1	1	3
IAAV1930	1A	440.38	3	3	3	3	3	1	3	1	3	3	3	3	3	1	1	1	3	1	3	3	1	1	3	3	3	3	3	1	3	3	1	1	3	3	1	3	3	1	3	1	3	3	3	3	1	1	3
IAAV2844	1A	440.38	1	1	1	1	1	3	1	3	1	1	1	1	1	3	3	3	1	3	1	1	3	3	1	1	1	1	1	3	1	1	3	3	1	1	3	1	1	3	1	3	1	1	1	1	3	3	1
Kukri_c17412_1249	1A	442.01	3	3	3	3	3	1	3	1	3	3	3	3	3	1	1	1	3	1	3	3	1	1	3	3	3	3	3	1	3	3	1	1	3	3	1	3	3	1	3	1	3	3	3	3	1	1	3
IAAV4238	1A	447.55	3	3	1	3	3	3	1	3	3	3	3	1	1	3	3	3	3	3	1	3	3	3	3	3	3	3	3	3	3	3	3	3	1	3	3	1	3	3	3	3	1	1	3	1	3	3	1
Excalibur_c41592_100	1A	459.02	1	1	1	1	1	3	1	1	1	1	1	1	3	3	1	1	1	3	1	1	1	3	1	3	1	1	1	1	1	1	3	3	1	1	1	3	1	3	1	3	1	1	1	1	3	1	1
IAAV2162	1A	459.02	1	1	1	1	1	3	1	1	1	1	1	1	3	3	3	3	1	3	1	1	3	3	1	1	1	1	1	3	1	1	3	3	1	1	1	3	1	3	1	3	1	1	1	1	3	1	1
wsnp_Ex_c6476_11246531	1A	459.02	3	3	3	3	3	1	3	3	3	3	3	3	1	1	3	3	3	1	3	3	3	1	3	1	3	3	3	3	3	3	1	1	3	3	3	1	3	1	3	1	3	3	3	3	1	3	3
Kukri_c44500_315	1A	460.04	1	3	1	1	3	1	3	1	1	1	3	1	1	1	1	1	1	1	1	1	1	1	3	1	3	1	1	1	1	1	1	1	1	3	3	1	1	1	1	1	1	3	1	1	1	3	3
BobWhite_c1027_1127	1A	462.61	1	3	1	1	3	3	3	1	1	1	3	1	3	3	3	3	1	3	1	1	3	3	3	1	3	1	1	3	1	1	3	3	1	3	3	3	1	3	1	3	1	3	1	1	3	3	3
BS00022514_51	1A	462.61	1	3	1	1	3	1	3	1	1	1	3	1	1	1	1	1	1	1	1	1	1	1	3	1	3	1	1	1	1	1	1	1	1	3	3	1	1	1	1	1	1	3	1	1	1	3	3
BS00035273_51	1A	462.61	1	3	3	1	3	1	3	1	1	1	3	3	1	1	3	1	1	1	3	1	1	1	3	3	3	1	1	1	1	1	1	1	1	3	3	1	1	1	1	1	3	3	1	3	1	3	3
BS00070695_51	1A	462.61	3	1	3	3	1	1	3	3	3	3	1	3	1	1	1	1	3	1	3	3	1	1	1	3	1	3	3	1	3	3	1	1	3	1	1	1	3	1	3	1	3	3	3	3	1	1	3
BS00070991_51	1A	462.61	3	1	3	3	1	1	3	3	3	3	1	3	1	1	1	1	3	1	3	3	1	1	1	3	1	3	3	1	3	3	1	1	3	1	1	1	3	1	3	1	3	3	3	3	1	1	3
Excalibur_c27376_74	1A	462.61	3	1	3	3	1	1	1	3	3	3	1	3	1	1	1	1	3	1	3	3	1	1	1	3	1	3	3	1	3	3	1	1	3	1	1	1	3	1	3	1	3	1	3	3	1	1	1
Excalibur_c46365_304	1A	466.95	3	1	3	3	1	1	1	3	3	3	1	3	1	1	1	1	3	1	3	3	1	1	1	3	1	3	3	3	3	3	1	1	3	1	1	1	3	1	3	1	3	1	3	3	1	1	1
IAAV8446	1A	466.95	1	3	1	1	3	3	3	1	1	1	3	NA	3	3	3	3	1	3	1	1	3	3	3	3	3	1	1	1	1	1	3	3	1	3	3	3	1	3	1	3	1	3	1	1	3	3	3
Tdurum_contig11349_810	1A	466.95	3	1	3	3	1	1	1	3	3	3	1	3	1	1	1	1	3	1	3	3	1	1	1	3	1	3	3	3	3	3	1	1	3	1	1	1	3	1	3	1	3	1	3	3	1	1	1
wsnp_Ex_c1861_3507281	1A	466.95	1	1	1	1	1	1	1	1	1	1	1	1	1	1	1	1	1	1	3	1	1	1	1	3	1	1	1	3	1	1	1	1	1	1	1	1	1	1	1	1	1	1	1	3	1	1	1
wsnp_Ex_rep_c67492_66096650	1A	466.95	3	1	3	3	1	1	1	3	3	3	1	3	1	1	1	1	3	1	3	3	1	1	1	3	1	3	3	3	3	3	1	1	3	1	1	1	3	1	3	1	3	1	3	3	1	1	1
Excalibur_c12932_2102	1A	467.04	1	3	1	1	3	3	3	1	1	1	3	1	3	3	3	3	1	3	1	1	3	3	3	1	3	1	1	1	1	1	3	3	1	3	3	3	1	3	1	3	1	3	1	1	3	3	3
GENE.0543_1074	1A	467.04	3	1	3	3	1	1	1	3	3	3	1	3	1	1	1	1	3	1	3	3	1	1	1	3	1	3	3	3	3	3	1	1	3	1	1	1	3	1	3	1	3	1	3	3	1	1	1
GENE.0543_113	1A	467.04	1	3	1	1	3	3	3	1	1	1	3	1	3	3	3	3	1	3	1	1	3	3	3	1	3	1	1	1	1	1	3	3	1	3	3	3	1	3	1	3	1	3	1	1	3	3	3
Kukri_c4204_1346	1A	467.04	3	1	3	3	1	1	1	3	3	3	1	3	1	1	1	1	3	1	3	3	1	1	1	3	1	3	3	3	3	3	1	1	3	1	1	1	3	1	3	1	3	1	3	3	1	1	1
Kukri_c4204_1673	1A	467.04	1	3	1	1	3	3	3	1	1	1	3	1	3	3	3	3	1	3	1	1	3	3	3	1	3	1	1	1	1	1	3	3	1	3	3	3	1	3	1	3	1	3	1	1	3	3	3
wsnp_CAP11_c1827_988367	1A	470.81	1	1	1	1	1	1	1	1	1	1	1	1	3	3	1	1	1	3	1	1	1	1	1	1	1	1	1	1	1	1	1	1	1	1	1	3	1	3	1	3	1	1	1	1	3	1	1
IAAV1301	1A	471.45	1	1	3	1	1	1	1	1	1	1	1	1	1	1	1	1	1	1	3	1	1	1	1	1	1	1	1	3	1	1	1	1	1	1	1	1	1	1	1	1	1	1	1	3	1	1	1
Kukri_c43479_207	1A	471.45	1	1	NA	1	1	1	1	1	1	1	1	1	1	1	1	1	1	1	2	1	1	1	1	1	1	1	1	2	1	1	1	1	1	1	1	1	1	1	1	1	1	1	1	2	1	1	1
wsnp_Ku_c330_683203	1A	473.04	1	3	1	1	3	3	1	3	1	1	3	3	3	3	3	1	1	1	1	1	1	3	3	3	3	1	1	1	1	1	3	3	1	3	3	3	1	3	1	3	3	1	1	1	3	3	1
Kukri_c34242_404	1A	475.71	1	3	1	1	3	1	1	3	1	1	3	1	1	1	3	3	1	1	3	1	1	1	3	1	3	1	1	3	1	1	1	1	1	3	1	1	1	1	1	1	1	1	1	3	1	1	1
RAC875_c85550_52	1A	475.71	1	3	1	1	3	1	1	3	1	1	3	1	1	1	3	3	1	1	3	1	1	1	3	1	3	1	1	3	1	1	1	1	1	3	1	1	1	1	1	1	1	1	1	3	1	1	1
wsnp_RFL_Contig3881_4265086	1A	475.71	3	3	3	3	3	3	3	3	3	3	3	3	3	3	3	3	3	3	3	3	3	3	3	3	3	3	3	3	3	3	3	3	3	3	3	3	3	3	3	3	3	3	3	3	3	3	3
Kukri_c21396_771	1A	477.23	1	1	3	1	1	1	1	1	1	1	1	1	1	1	1	1	1	1	1	1	1	1	1	1	1	1	1	1	1	1	1	1	1	1	1	1	1	1	1	1	1	1	1	1	1	1	1
RAC875_rep_c120646_120	1A	477.23	3	3	1	3	3	3	3	3	3	3	3	3	3	3	3	3	3	3	3	3	3	3	3	3	3	3	3	3	3	3	3	3	3	3	3	3	3	3	3	3	3	3	3	3	3	3	3
TA003848.0787	1A	477.23	1	1	3	1	1	1	1	1	1	1	1	1	1	1	1	1	1	1	1	1	1	1	1	1	1	1	1	1	1	1	1	1	1	1	1	1	1	1	1	1	1	1	1	1	1	1	1
wsnp_Ex_c1255_2411550	1A	477.23	1	3	1	1	3	3	1	3	1	1	3	3	3	3	3	1	1	1	3	1	1	3	3	3	3	1	1	3	1	1	3	3	1	3	3	3	1	3	1	3	3	1	1	3	3	3	1
IAAV3217	1A	480.56	3	3	1	3	3	3	3	3	3	3	3	3	3	3	3	3	3	3	3	3	3	3	3	3	3	3	3	3	3	3	3	3	3	3	3	3	3	3	3	3	3	3	3	3	3	3	3
JD_c394_819	1A	480.56	1	1	3	1	1	1	1	1	1	1	1	1	1	1	1	1	1	1	1	1	1	1	1	1	1	1	1	1	1	1	1	1	1	1	1	1	NA	1	1	1	1	1	1	1	1	1	1
Ra_c56010_289	1A	480.56	1	1	3	1	1	1	1	1	1	1	1	1	1	1	1	1	1	1	1	1	1	1	1	1	1	1	1	1	1	1	1	1	1	1	1	1	1	1	1	1	1	1	1	1	1	1	1
RAC875_c85550_291	1A	480.56	3	3	1	3	3	3	3	3	3	3	3	3	3	3	3	3	3	3	3	3	3	3	3	3	3	3	3	3	3	3	3	3	3	3	3	3	3	3	3	3	3	3	3	3	3	3	3
BS00021780_51	1A	481.08	3	3	3	3	3	1	3	3	3	3	3	1	1	1	3	3	3	3	3	3	3	1	3	1	3	3	3	3	1	3	1	1	3	3	1	1	3	1	3	1	1	3	3	3	1	1	3
BS00096930_51	1A	481.08	3	1	3	3	1	3	3	1	3	3	1	3	3	3	1	1	3	3	1	3	3	3	1	3	1	3	3	1	3	3	3	3	3	1	3	3	3	3	3	3	3	3	3	1	3	3	3
RAC875_c29059_648	1A	481.08	1	3	3	1	3	1	1	3	1	1	3	1	1	1	3	3	1	1	3	1	1	1	3	1	3	1	1	3	1	1	1	1	1	3	1	1	1	1	1	1	1	1	1	3	1	1	1
RAC875_c43389_105	1A	481.08	3	1	1	3	1	3	3	1	3	3	1	3	3	3	1	1	3	3	1	3	3	3	1	3	1	3	3	1	3	3	3	3	3	1	3	3	3	3	3	3	3	3	3	1	3	3	3
RAC875_c85550_73	1A	481.08	3	3	3	3	3	1	3	3	3	3	3	1	1	1	3	3	3	3	3	3	3	1	3	1	3	3	3	3	1	3	1	1	3	3	1	1	3	1	3	1	1	3	3	3	1	1	3
RAC875_rep_c71921_672	1A	481.08	3	3	3	3	3	1	3	3	3	3	3	1	1	1	3	3	3	3	3	3	3	1	3	1	3	3	3	3	1	3	1	1	3	3	1	1	3	1	3	1	1	3	3	3	1	1	3
wsnp_Ex_c3887_7051325	1A	481.08	3	3	3	3	3	1	3	3	3	3	3	1	1	1	3	3	3	3	3	3	3	1	3	1	3	3	3	3	1	3	1	1	3	3	1	1	3	1	3	1	1	3	3	3	1	1	3
wsnp_Ex_c46670_52108070	1A	481.08	1	1	1	1	1	1	1	1	1	1	1	3	3	3	1	3	3	1	1	1	3	3	1	3	1	3	3	1	3	1	3	3	1	1	3	3	1	3	1	3	3	1	1	1	3	3	1
wsnp_Ex_c52086_55808126	1A	481.08	1	3	3	1	3	1	1	3	1	1	3	1	1	1	3	3	1	1	3	1	1	1	3	1	3	1	1	3	1	1	1	1	1	3	1	1	1	1	1	1	1	1	1	3	1	1	1
wsnp_Ex_c52086_55808193	1A	481.08	3	1	1	3	1	3	3	1	3	3	1	3	3	3	1	1	3	3	1	3	3	3	1	3	1	3	3	1	3	3	3	3	3	1	3	3	3	3	3	3	3	3	3	1	3	3	3
BobWhite_c66315_505	1A	482.63	3	3	3	3	3	3	3	3	3	3	3	1	1	1	3	1	1	3	3	3	1	1	3	1	3	1	1	3	1	3	1	1	3	3	1	1	3	1	3	1	1	3	3	3	1	1	3
BS00050522_51	1B	21.67	3	3	3	3	1	3	3	3	3	3	3	3	3	3	3	3	3	3	1	3	3	3	1	3	1	3	3	3	3	3	3	1	3	3	3	3	1	3	1	3	1	3	3	1	3	3	3
Excalibur_c10657_796	1B	31.34	1	1	1	1	1	1	1	1	1	1	1	1	1	3	1	1	1	1	3	3	1	3	1	3	1	1	1	1	1	1	1	3	1	1	1	3	1	1	3	1	1	1	1	3	1	1	1
Kukri_c44369_131	1B	31.34	3	3	1	3	3	1	3	3	3	3	3	1	3	3	3	3	3	3	3	3	3	3	1	3	1	3	3	3	3	3	3	3	3	3	3	3	3	3	3	3	1	3	3	3	1	3	3
RAC875_c24163_155	1B	31.34	1	1	1	1	1	1	1	1	3	3	1	1	1	3	1	1	1	3	3	3	1	3	3	3	3	1	1	1	1	1	1	3	3	1	1	3	1	1	3	1	3	1	3	3	1	1	1
Tdurum_contig28703_293	1B	34.59	1	1	1	1	1	1	1	1	3	3	1	1	1	3	1	1	1	3	1	3	1	3	3	3	3	1	1	1	1	1	1	1	3	1	1	3	1	1	1	1	1	1	3	1	1	1	1
BobWhite_c5793_372	1B	35.47	3	3	3	3	3	3	3	3	3	3	3	3	3	1	3	3	3	3	3	1	3	1	3	1	3	3	3	3	3	3	3	3	3	3	3	1	3	3	3	3	3	3	3	3	3	3	3
BS00022505_51	1B	35.47	1	1	1	1	1	1	1	1	1	1	1	1	1	3	1	1	1	1	1	3	1	3	1	3	1	1	1	1	1	1	1	1	1	1	1	3	1	1	1	1	1	1	1	1	1	1	1
Kukri_c37738_417	1B	35.47	3	3	3	3	3	3	3	3	3	3	3	3	3	3	3	3	3	3	1	3	3	1	1	1	1	3	3	3	3	3	3	1	3	3	3	1	3	3	1	3	1	3	3	1	3	3	3
Kukri_c79308_278	1B	35.47	3	3	3	3	3	3	3	3	3	3	3	3	3	1	3	3	3	3	3	1	3	1	3	1	3	3	3	3	3	3	3	3	3	3	3	1	3	3	3	3	3	3	3	3	3	3	3
Kukri_c8390_1515	1B	35.47	3	3	3	3	3	3	3	3	3	3	3	3	3	3	3	3	3	3	3	3	3	1	1	1	1	3	3	3	3	3	3	3	3	3	3	1	3	3	3	3	3	3	3	3	3	3	3
Kukri_rep_c106834_139	1B	35.47	3	3	3	3	3	3	3	3	3	3	3	3	3	1	3	3	3	3	3	1	3	1	3	1	3	3	3	3	3	3	3	3	3	3	3	1	3	3	3	3	3	3	3	3	3	3	3
TA006040.0724	1B	35.47	3	3	3	3	3	3	3	3	3	3	3	3	3	3	3	3	3	3	1	3	3	3	3	3	3	3	3	3	3	3	3	1	3	3	3	3	3	3	1	3	1	3	3	1	3	3	3
D_GB5Y7FA01BMOJY_241	1B	37.52	3	3	3	1	3	3	3	3	3	3	3	3	3	3	3	3	3	3	1	3	3	1	1	1	3	3	3	1	3	1	1	1	3	3	3	3	3	3	1	3	1	3	3	1	3	3	3
Excalibur_c51033_173	1B	37.52	1	1	3	3	3	3	3	3	3	3	3	3	3	3	3	3	3	3	3	3	3	3	3	3	3	3	3	3	1	1	1	1	3	3	3	3	3	3	3	3	3	3	3	3	3	3	3
CAP7_c3299_316	1B	63.87	1	3	1	1	1	1	1	1	1	1	1	1	1	3	1	1	1	1	1	3	1	1	1	1	1	1	1	3	1	3	3	1	1	1	1	3	1	1	1	1	1	1	1	1	3	1	1
BS00066271_51	1B	71.09	1	1	1	1	1	1	1	1	1	1	1	1	1	3	1	1	1	1	1	3	1	3	3	3	3	1	1	1	1	1	1	1	1	1	1	3	1	1	1	1	1	1	1	1	3	1	1
Excalibur_c2868_1808	1B	71.09	1	1	1	1	1	1	1	1	3	3	1	1	1	1	1	1	1	3	1	1	1	1	1	1	1	1	1	1	1	1	1	1	3	1	1	1	1	1	1	1	1	1	3	1	1	1	1
IAAV392	1B	71.09	1	1	1	1	1	1	1	1	3	3	1	1	1	1	1	1	1	3	1	1	1	1	1	1	1	1	1	1	1	1	1	1	3	1	1	1	1	1	1	1	1	1	3	1	1	1	1
RAC875_c8282_644	1B	71.09	3	3	3	3	3	3	3	1	3	3	3	3	3	1	3	3	3	3	3	1	3	1	1	1	1	3	3	3	3	3	3	3	3	3	3	1	3	3	3	3	3	3	3	3	1	3	3
RAC875_c3692_2287	1B	82.06	3	3	NA	3	3	3	3	3	3	3	3	3	3	3	3	3	3	3	3	3	3	3	3	3	3	3	3	3	3	3	3	3	3	3	3	3	3	3	3	3	3	3	3	3	3	3	3
BS00105846_51	1B	95.27	1	3	3	1	1	1	1	3	1	1	1	1	3	1	1	1	1	1	1	1	1	1	3	1	3	1	1	3	1	3	3	1	1	1	1	1	1	1	1	1	1	1	1	1	1	1	1
BS00022101_51	1B	98.13	1	1	3	1	1	3	1	1	1	1	1	3	1	1	1	1	1	1	1	1	1	1	1	1	1	1	1	1	1	1	1	1	1	1	1	1	1	1	1	1	1	1	1	1	1	1	1
BS00083339_51	1B	100.21	3	3	3	3	3	3	3	3	1	3	1	3	3	3	3	3	3	3	3	3	3	1	3	3	3	3	3	3	3	3	3	3	3	1	1	3	3	3	3	3	1	3	3	3	3	1	3
wsnp_Ku_c13229_21142792	1B	100.21	1	1	1	1	3	1	1	1	1	1	1	1	1	3	1	1	1	1	1	3	1	1	1	1	1	1	1	1	1	1	1	1	1	1	1	3	3	1	1	1	1	1	1	1	3	1	1
BS00064829_51	1B	101.98	3	3	3	3	3	3	3	3	1	3	1	3	3	3	3	3	3	3	3	3	3	1	3	3	3	3	3	3	3	3	3	3	3	1	1	3	3	3	3	3	1	3	3	3	3	1	3
BS00072113_51	1B	102.41	3	3	3	3	1	1	3	3	3	3	3	1	3	1	3	3	3	3	3	1	3	3	3	3	3	3	3	3	3	3	3	3	3	3	3	1	1	3	3	3	3	3	3	3	1	3	3
Excalibur_c16851_835	1B	102.41	3	NA	1	1	1	3	1	1	3	3	1	3	1	1	1	1	1	3	3	3	1	3	1	1	1	1	1	1	3	3	3	NA	3	1	1	3	1	1	3	1	3	1	3	3	3	1	1
Excalibur_rep_c67198_530	1B	102.41	3	3	3	3	3	3	3	3	1	1	3	3	3	3	3	3	3	1	3	3	3	3	1	3	3	3	3	3	3	3	3	3	1	3	3	3	3	3	3	3	3	3	1	3	3	3	3
GENE.3569_500	1B	102.41	3	3	3	3	3	3	3	3	1	1	3	3	3	3	3	3	3	1	3	3	3	3	1	3	3	3	3	3	3	3	3	NA	1	3	3	3	3	3	3	3	3	3	1	3	3	3	3
IAAV3809	1B	102.41	1	1	1	1	1	1	1	1	3	3	1	1	1	1	1	1	1	3	1	1	1	1	3	1	1	1	1	1	1	1	1	1	3	1	1	1	3	1	1	1	1	1	3	1	1	1	1
Ku_c31363_2165	1B	102.41	1	1	1	1	1	1	1	1	3	3	1	1	1	1	1	1	1	3	1	1	1	1	3	1	1	1	1	1	1	1	1	1	3	1	1	1	1	1	1	1	1	1	3	1	1	1	1
Kukri_c1312_666	1B	102.41	1	1	1	1	1	1	1	1	3	3	1	1	1	1	1	1	1	3	1	1	1	1	1	1	1	1	1	1	1	1	1	1	3	1	1	1	1	1	1	1	1	1	3	1	1	1	1
Kukri_c38845_821	1B	102.41	3	3	3	3	3	3	3	3	1	1	3	3	3	3	3	3	3	1	3	3	3	3	1	3	3	3	3	3	3	3	3	NA	1	3	3	3	3	3	3	3	3	3	1	3	3	3	3
RAC875_c113582_346	1B	102.41	3	3	3	3	3	3	3	3	1	1	3	3	3	3	3	3	3	1	3	3	3	3	3	3	3	3	3	3	3	3	3	NA	1	3	3	3	3	3	3	3	3	3	1	3	3	3	3
RFL_Contig4104_670	1B	102.41	3	3	3	3	3	3	3	3	1	1	3	3	3	3	3	3	3	1	3	3	3	3	1	3	3	3	3	3	3	3	3	3	1	3	3	3	3	3	3	3	3	3	1	3	3	3	3
Tdurum_contig44219_318	1B	102.41	1	1	1	1	1	1	1	1	3	3	1	1	1	1	1	1	1	3	1	1	1	1	3	1	1	1	1	1	1	1	1	NA	3	1	1	1	1	1	1	1	1	1	3	1	1	1	1
wsnp_Ku_c28164_38103270	1B	102.41	3	3	3	3	3	3	3	3	1	1	3	3	3	3	3	3	3	1	3	3	3	3	1	3	3	3	3	3	3	3	3	3	1	3	3	3	3	3	3	3	3	3	1	3	3	3	3
Ex_c15700_1040	1B	102.58	1	1	3	3	3	3	3	3	3	3	3	3	3	3	3	3	3	3	3	3	3	3	3	3	3	3	3	3	1	1	1	1	3	3	3	3	3	3	3	3	3	3	3	3	3	3	3
Kukri_rep_c84426_281	1B	105.85	1	1	1	1	1	1	1	1	3	1	1	1	1	1	1	1	1	1	1	1	1	1	1	1	1	1	1	1	1	1	1	1	1	1	1	1	1	1	1	1	1	1	1	1	1	1	1
RAC875_c44107_1133	1B	105.85	1	1	1	1	1	1	1	1	3	1	1	NA	1	1	1	1	1	1	1	1	1	1	1	1	1	1	1	1	1	1	1	1	1	1	1	1	1	1	1	1	1	1	1	1	1	1	1
RAC875_rep_c105400_1131	1B	105.85	1	1	1	1	1	1	1	1	3	1	1	1	1	1	1	1	1	1	1	1	1	1	1	1	1	1	1	1	1	1	1	1	1	1	1	1	1	1	1	1	1	1	1	1	1	1	1
BobWhite_c28295_256	1B	133.42	1	NA	1	1	1	1	1	1	3	3	1	1	1	1	1	1	1	3	1	1	1	1	3	1	1	1	1	1	1	1	1	1	3	1	1	1	1	1	1	1	1	1	3	1	1	1	1
RFL_Contig4140_1135	1B	133.42	1	1	1	1	3	3	1	1	1	1	1	3	1	3	1	1	1	1	1	3	1	1	1	1	1	1	1	1	1	1	1	1	1	1	1	3	3	1	1	1	1	1	1	1	3	1	1
BS00006820_51	1B	134.29	3	3	3	3	3	3	3	3	3	3	3	3	3	3	3	3	3	3	1	3	3	1	1	1	3	3	3	1	3	1	1	1	3	3	3	3	3	3	1	3	1	3	3	1	3	3	3
Excalibur_c46114_572	1B	134.29	3	3	3	3	3	3	3	3	1	1	3	3	3	3	3	3	3	1	1	3	3	1	1	1	3	3	3	1	3	1	1	1	1	3	3	3	3	3	1	3	1	3	1	1	3	3	3
GENE.0019_1155	1B	134.29	3	3	3	3	3	3	3	3	3	3	3	3	3	3	3	3	3	3	1	3	3	1	1	1	3	3	3	1	3	1	1	1	3	3	3	3	3	3	1	3	1	3	3	1	3	3	3
Ku_c1312_1194	1B	134.29	3	3	3	3	3	3	3	3	3	3	3	3	3	3	3	3	3	3	1	3	3	1	1	1	3	3	3	1	3	1	1	1	3	3	3	3	3	3	1	3	1	3	3	1	3	3	3
Kukri_c76307_182	1B	134.29	1	3	1	1	3	3	1	3	3	3	1	3	3	3	1	1	1	3	1	3	1	1	3	1	3	1	1	1	1	1	1	1	3	1	1	3	3	1	1	1	1	1	3	1	3	1	1
Ra_c69552_1419	1B	134.29	3	3	3	3	3	3	3	3	1	1	3	3	3	3	3	3	3	1	1	3	3	1	1	1	3	3	3	1	3	1	1	1	1	3	3	3	3	3	1	3	1	3	1	1	3	3	3
RAC875_c63624_753	1B	134.29	3	3	3	3	3	3	3	3	3	3	3	3	3	3	3	3	3	3	1	3	3	1	1	1	3	3	3	1	3	1	1	1	3	3	3	3	3	3	1	3	1	3	3	1	3	3	3
RFL_Contig5637_1008	1B	134.29	3	3	3	3	3	3	3	3	3	3	3	3	3	3	3	3	3	3	1	3	3	1	1	1	3	3	3	1	3	1	1	1	3	3	3	3	3	3	1	3	1	3	3	1	3	3	3
TA003235.0794	1B	134.29	1	1	1	1	1	1	1	1	3	3	1	1	1	1	1	1	1	3	1	1	1	1	1	1	1	1	1	1	1	1	1	1	3	1	1	1	1	1	1	1	1	1	3	1	1	1	1
Tdurum_contig42092_1244	1B	134.29	1	1	1	1	1	1	1	1	3	3	1	1	1	1	1	1	1	3	1	1	1	1	1	1	1	1	1	1	1	1	1	1	3	1	1	1	1	1	1	1	1	1	3	1	1	1	1
Tdurum_contig47083_278	1B	134.29	1	1	1	1	3	3	1	1	3	3	1	3	1	3	1	1	1	3	1	3	1	1	1	1	1	1	1	1	1	1	1	1	3	1	1	3	3	1	1	1	1	1	3	1	3	1	1
wsnp_BE637971B_Ta_1_20	1B	134.29	1	1	1	1	1	1	1	1	1	1	1	1	1	1	1	1	1	1	3	1	1	3	3	3	1	1	1	3	1	3	3	NA	1	1	1	1	1	1	3	1	3	1	1	3	1	1	1
Kukri_c29655_194	1B	135.1	1	1	1	1	3	3	1	1	1	1	1	3	1	3	1	1	1	1	1	3	1	1	1	1	1	1	1	1	1	1	1	1	1	1	1	3	3	1	1	1	1	1	1	1	3	1	1
wsnp_Ex_c50340_54659660	1B	135.1	3	3	3	3	1	1	3	3	3	3	3	1	3	1	3	3	3	3	3	1	3	3	3	3	3	3	3	3	3	3	3	3	3	3	3	1	1	3	3	3	3	3	3	3	1	3	3
BS00086667_51	1B	141.79	1	1	1	1	1	1	1	1	3	3	1	1	1	1	1	1	1	3	1	1	1	1	1	1	1	1	1	1	1	1	1	1	3	1	1	1	1	1	1	1	1	1	3	1	1	1	1
BobWhite_c15522_625	1B	141.97	3	3	1	1	1	1	1	1	3	3	1	NA	1	1	1	1	1	3	1	1	1	1	1	1	1	1	1	1	3	3	3	3	3	1	1	1	1	1	1	1	1	1	3	1	1	1	1
BS00087939_51	1B	141.97	3	3	1	1	1	1	1	1	3	3	1	1	1	1	1	1	1	3	1	1	1	1	1	1	1	1	1	1	3	3	3	3	3	1	1	1	1	1	1	1	1	1	3	1	1	1	1
Excalibur_c44498_610	1B	141.97	1	1	3	3	3	3	3	3	3	3	3	3	3	3	3	3	3	3	3	3	3	3	3	3	3	3	3	3	1	1	1	NA	3	3	3	3	3	3	3	3	3	3	3	3	3	3	3
Excalibur_c46902_92	1B	141.97	1	1	1	1	1	1	1	3	1	1	1	3	1	1	1	3	1	1	1	1	3	1	1	1	1	1	1	1	1	1	1	1	1	1	1	1	1	1	1	1	1	1	1	1	1	1	1
GENE.0456_163	1B	141.97	1	1	1	1	1	1	1	1	3	3	1	1	1	1	1	1	1	3	1	1	1	1	1	1	1	1	1	1	1	1	1	1	3	1	1	1	1	1	1	1	1	1	3	1	1	1	1
IAAV3128	1B	141.97	3	3	1	1	1	1	1	1	3	3	1	1	1	1	1	1	1	3	1	1	1	1	1	1	1	1	1	1	3	3	3	3	3	1	1	1	1	1	1	1	1	1	3	1	1	1	1
BobWhite_c13654_447	1B	142.58	3	3	3	3	3	3	3	3	1	1	3	3	3	3	3	3	3	1	3	3	3	3	3	3	3	3	3	3	3	3	3	3	1	3	3	3	3	3	3	3	3	3	1	3	3	3	3
BobWhite_c14271_1379	1B	142.58	3	1	1	3	3	1	3	3	1	1	3	1	3	1	3	1	1	1	1	1	1	1	1	3	1	1	3	3	3	3	3	1	1	3	3	1	1	3	1	1	1	3	1	1	1	3	3
BobWhite_c3068_393	1B	142.58	3	3	3	3	3	3	3	3	1	1	3	3	3	3	3	3	3	1	3	3	3	3	3	3	3	3	3	3	3	3	3	3	1	3	3	3	3	3	3	3	3	3	1	3	3	3	3
BobWhite_c6812_144	1B	142.58	1	1	1	1	1	1	1	1	3	3	1	1	1	1	1	1	1	3	1	1	1	1	1	1	1	1	1	1	1	1	1	1	3	1	1	1	1	1	1	1	1	1	3	1	1	1	1
BS00004453_51	1B	142.58	1	1	1	1	1	1	1	1	3	3	1	1	1	1	1	1	1	3	1	1	1	1	1	1	1	1	1	1	1	1	1	1	3	1	1	1	1	1	1	1	1	1	3	1	1	1	1
BS00005004_51	1B	142.58	1	1	1	1	1	1	1	1	3	3	1	1	1	1	1	1	1	3	1	1	1	1	1	1	1	1	1	1	1	1	1	1	3	1	1	1	1	1	1	1	1	1	3	1	1	1	1
BS00021899_51	1B	142.58	1	1	1	1	1	1	1	1	3	3	1	1	1	1	1	1	1	3	1	1	1	1	1	1	1	1	1	1	1	1	1	1	3	1	1	1	1	1	1	1	1	1	3	1	1	1	1
BS00021902_51	1B	142.58	1	1	1	1	1	1	1	1	3	3	1	1	1	1	1	1	1	3	1	1	1	1	1	1	1	1	1	1	1	1	1	1	3	1	1	1	1	1	1	1	1	1	3	1	1	1	1
BS00022604_51	1B	142.58	3	3	3	3	3	3	3	3	1	1	3	3	3	3	3	3	3	1	3	3	3	3	3	3	3	3	3	3	3	3	3	3	1	3	3	3	3	3	3	3	3	3	1	3	3	3	3
BS00023056_51	1B	142.58	1	1	1	1	1	1	1	1	3	3	1	1	1	1	1	1	1	3	1	1	1	1	1	1	1	1	1	1	1	1	1	1	3	1	1	1	1	1	1	1	1	1	3	1	1	1	1
BS00023185_51	1B	142.58	1	1	1	1	1	1	1	1	3	3	1	1	1	1	1	1	1	3	1	1	1	1	1	1	1	1	1	1	1	1	1	1	3	1	1	1	1	1	1	1	1	1	3	1	1	1	1
BS00038368_51	1B	142.58	1	1	1	1	1	1	1	1	3	3	1	1	1	1	1	1	1	3	1	1	1	1	1	1	1	1	1	1	1	1	1	1	3	1	1	1	1	1	1	1	1	1	3	1	1	1	1
BS00058711_51	1B	142.58	3	3	3	3	3	3	3	3	1	1	3	3	3	3	3	3	3	1	3	3	3	3	3	3	3	3	3	3	3	3	3	3	1	3	3	3	3	3	3	3	3	3	1	3	3	3	3
BS00063080_51	1B	142.58	1	1	1	1	1	1	1	1	3	3	1	1	1	1	1	1	1	3	1	1	1	1	1	1	1	1	1	1	1	1	1	1	3	1	1	1	1	1	1	1	1	1	3	1	1	1	1
BS00065311_51	1B	142.58	3	3	3	3	3	3	3	3	1	1	3	3	3	3	3	3	3	1	3	3	3	3	3	3	3	3	3	3	3	3	3	3	1	3	3	3	3	3	3	3	3	3	1	3	3	3	3
BS00065401_51	1B	142.58	3	3	3	3	3	3	3	3	1	1	3	3	3	3	3	3	3	1	3	3	3	3	3	3	3	3	3	3	3	3	3	3	1	3	3	3	3	3	3	3	3	3	1	3	3	3	3
BS00066398_51	1B	142.58	1	1	1	1	1	1	1	1	NA	NA	1	1	1	1	1	1	1	NA	1	1	1	1	1	1	1	1	1	1	1	1	1	1	3	1	1	1	1	1	1	1	1	1	3	1	1	1	1
BS00067709_51	1B	142.58	1	1	1	1	1	1	1	1	3	3	1	1	1	1	1	1	1	3	1	1	1	1	1	1	1	1	1	1	1	1	1	1	3	1	1	1	1	1	1	1	1	1	3	1	1	1	1
BS00084722_51	1B	142.58	1	1	1	1	1	1	1	1	3	3	1	1	1	1	1	1	1	3	1	1	1	1	1	1	1	1	1	1	1	1	1	1	3	1	1	1	1	1	1	1	1	1	3	1	1	1	1
BS00087988_51	1B	142.58	1	1	1	1	1	1	1	1	3	3	1	1	1	1	1	1	1	3	1	1	1	1	1	1	1	1	1	1	1	1	1	1	3	1	1	1	1	1	1	1	1	1	3	1	1	1	1
BS00088256_51	1B	142.58	3	3	3	3	3	3	3	3	1	1	3	3	3	3	3	3	3	1	3	3	3	3	3	3	3	3	3	3	3	3	3	3	1	3	3	3	3	3	3	3	3	3	1	3	3	3	3
BS00089524_51	1B	142.58	1	1	1	1	1	3	1	1	1	1	1	3	1	3	1	1	1	1	3	3	1	3	3	3	1	1	1	1	1	1	1	NA	1	1	1	3	1	1	3	1	3	1	1	3	3	1	1
BS00092514_51	1B	142.58	1	1	1	1	1	1	1	1	3	3	1	1	1	1	1	1	1	3	1	1	1	1	1	1	1	1	1	1	1	1	1	1	3	1	1	1	1	1	1	1	1	1	3	1	1	1	1
BS00093102_51	1B	142.58	3	3	3	3	3	3	3	3	1	1	3	3	3	3	3	3	3	1	3	3	3	3	3	3	3	3	3	3	3	3	3	3	1	3	3	3	3	3	3	3	3	3	1	3	3	3	3
BS00094759_51	1B	142.58	3	3	3	3	3	3	3	3	1	1	3	3	3	3	3	3	3	1	3	3	3	3	3	3	3	3	3	3	3	3	3	3	1	3	3	3	3	3	3	3	3	3	1	3	3	3	3
BS00095751_51	1B	142.58	3	3	3	3	3	3	3	3	1	1	3	3	3	3	3	3	3	1	3	3	3	3	3	3	3	3	3	3	3	3	3	3	1	3	3	3	3	3	3	3	3	3	1	3	3	3	3
BS00110121_51	1B	142.58	1	1	1	1	1	1	1	1	3	3	1	1	1	1	1	3	3	3	1	1	3	1	3	1	1	3	1	1	1	1	1	1	3	1	1	1	1	1	1	3	1	1	3	1	1	1	1
CAP11_c3813_253	1B	142.58	3	3	3	3	3	3	3	3	1	1	3	3	3	3	3	3	3	1	3	3	3	3	3	3	3	3	3	3	3	3	3	3	1	3	3	3	3	3	3	3	3	3	1	3	3	3	3
CAP7_c3847_204	1B	142.58	3	3	3	3	3	1	3	3	1	1	3	1	3	1	3	1	1	1	1	1	1	NA	1	3	1	1	3	3	3	3	3	1	1	3	3	1	1	3	1	3	1	3	1	1	1	3	3
Excalibur_c12376_569	1B	142.58	3	3	3	3	3	3	3	3	1	1	3	3	3	3	3	3	3	1	3	3	3	3	3	3	3	3	3	1	3	1	1	3	1	3	3	3	3	3	3	3	3	3	1	3	3	3	3
Excalibur_c18009_66	1B	142.58	1	1	1	1	1	1	1	1	3	3	1	1	1	1	1	1	1	3	1	1	1	1	1	1	1	1	1	1	1	1	1	1	3	1	1	1	1	1	1	1	1	1	3	1	1	1	1
Excalibur_c25368_372	1B	142.58	3	3	3	3	3	3	3	1	1	1	3	3	3	3	3	1	3	1	3	3	1	3	3	3	3	3	3	3	3	3	3	3	1	3	3	3	3	3	3	3	3	3	1	3	3	3	3
Excalibur_c2541_262	1B	142.58	3	3	3	3	3	3	3	3	1	1	3	3	3	3	3	3	3	1	3	3	3	3	3	3	3	3	3	3	3	3	3	3	1	3	3	3	3	3	3	3	3	3	1	3	3	3	3
Excalibur_c31375_558	1B	142.58	3	3	3	3	3	3	3	3	1	1	3	3	3	3	3	3	3	1	3	3	3	3	3	3	3	3	3	3	3	3	3	3	1	3	3	3	3	3	3	3	3	3	1	3	3	3	3
Excalibur_c5775_228	1B	142.58	3	3	3	3	3	3	3	3	1	1	3	3	3	3	3	3	3	1	3	3	3	3	3	3	3	3	3	3	3	3	3	3	1	3	3	3	3	3	3	3	3	3	1	3	3	3	3
Excalibur_c6213_689	1B	142.58	1	1	1	1	1	1	1	1	3	3	1	1	1	1	1	1	1	3	1	1	1	1	1	1	1	1	1	1	1	1	1	1	3	1	1	1	1	1	1	1	1	1	3	1	1	1	1
Excalibur_c95327_51	1B	142.58	1	1	1	1	1	1	1	1	3	3	1	1	1	1	1	1	1	3	1	1	1	1	1	1	1	1	1	1	1	1	1	1	3	1	1	1	1	1	1	1	1	1	3	1	1	1	1
Excalibur_rep_c103847_565	1B	142.58	3	3	3	3	3	3	3	3	1	1	3	3	3	3	3	3	3	1	3	3	3	3	3	3	3	3	3	3	3	3	3	3	1	3	3	3	3	3	3	3	3	3	1	3	3	3	3
GENE.0087_561	1B	142.58	3	3	3	3	3	3	3	3	1	1	3	3	3	3	3	3	3	1	3	3	3	3	3	3	3	3	3	3	3	3	3	3	1	3	3	3	3	3	3	3	3	3	1	3	3	3	3
GENE.0346_235	1B	142.58	3	3	3	3	3	3	3	3	1	1	3	3	3	3	3	3	3	1	3	3	3	3	3	3	3	3	3	3	3	3	3	3	1	3	3	3	3	3	3	3	3	3	1	3	3	3	3
GENE.0553_173	1B	142.58	3	3	3	3	3	3	3	3	1	1	3	3	3	3	3	3	3	1	3	3	3	3	3	3	3	3	3	3	3	3	3	3	1	3	3	3	3	3	3	3	3	3	1	3	3	3	3
GENE.0815_140	1B	142.58	3	3	1	1	1	1	1	1	3	3	1	1	1	1	1	1	1	3	1	1	1	1	1	1	1	1	1	1	3	3	3	1	3	1	1	1	1	1	1	1	1	1	3	1	1	1	1
IAAV1833	1B	142.58	1	1	1	1	1	1	1	1	3	3	1	1	1	1	1	1	1	3	1	1	1	1	NA	1	1	1	1	1	1	1	1	1	3	1	1	1	1	1	1	1	1	1	3	1	1	1	1
IAAV2147	1B	142.58	3	3	3	3	3	3	3	3	1	3	1	3	3	3	3	3	3	3	3	3	3	1	3	3	3	3	3	3	3	3	3	3	3	1	1	3	3	3	3	3	1	3	3	3	3	1	3
IAAV2375	1B	142.58	3	3	3	3	3	3	3	3	1	1	3	3	3	3	3	3	3	1	3	3	3	3	3	3	3	3	3	3	3	3	3	3	1	3	3	3	3	3	3	3	3	3	1	3	3	3	3
IAAV3430	1B	142.58	3	3	3	3	3	3	3	3	1	1	3	3	3	3	3	3	3	1	3	3	3	3	3	3	3	3	3	3	3	3	3	3	1	3	3	3	3	3	3	3	3	3	1	3	3	3	3
IAAV3801	1B	142.58	3	3	3	3	3	3	3	3	1	1	3	3	3	3	3	3	3	1	3	3	3	3	3	3	3	3	3	3	3	3	3	3	1	3	3	3	3	3	3	3	3	3	1	3	3	3	3
IAAV4531	1B	142.58	3	3	3	3	3	3	3	3	1	1	3	3	3	3	3	3	3	1	3	3	3	3	3	3	3	3	3	3	3	3	3	3	1	3	3	3	3	3	3	3	3	3	1	3	3	3	3
IAAV4559	1B	142.58	1	1	1	1	1	1	1	1	3	3	1	1	1	1	1	1	1	3	1	1	1	1	1	1	1	1	1	1	1	1	1	1	3	1	1	1	1	1	1	1	1	1	3	1	1	1	1
IAAV6025	1B	142.58	3	3	3	3	3	3	3	3	1	1	3	3	3	3	3	3	3	1	3	3	3	3	3	3	3	3	3	3	3	3	3	3	1	3	3	3	3	3	3	3	3	3	1	3	3	3	3
IAAV8714	1B	142.58	1	1	1	1	1	1	1	1	3	3	1	1	1	1	1	1	1	3	1	1	1	1	1	1	1	1	1	1	1	1	1	1	3	1	1	1	1	1	1	1	1	1	3	1	1	1	1
IACX19890	1B	142.58	3	3	3	3	3	3	3	3	1	1	3	3	3	3	3	3	3	1	3	3	3	3	3	3	3	3	3	3	3	3	3	3	1	3	3	3	3	3	3	3	3	3	1	3	3	3	3
IACX7053	1B	142.58	1	1	1	1	1	1	1	1	3	3	1	1	1	1	1	1	1	3	1	1	1	1	1	1	1	1	1	1	1	1	1	1	3	1	1	1	1	1	1	1	1	1	3	1	1	1	1
Jagger_c6107_116	1B	142.58	3	3	3	3	3	3	3	3	1	1	3	3	3	3	3	3	3	1	3	3	3	3	3	3	3	3	3	3	3	3	3	3	1	3	3	3	3	3	3	3	3	3	1	3	3	3	3
Kukri_c11756_1706	1B	142.58	3	3	3	3	3	3	3	3	1	1	3	3	3	3	3	3	3	1	3	3	3	3	1	3	3	3	3	3	3	3	3	3	1	3	3	3	3	3	3	3	3	3	1	3	3	3	3
Kukri_c25654_382	1B	142.58	1	1	1	1	1	1	1	1	3	3	1	1	1	1	1	1	1	3	1	1	1	1	1	1	1	1	1	1	1	1	1	1	3	1	1	1	1	1	1	1	1	1	3	1	1	1	1
Kukri_c26731_312	1B	142.58	3	3	3	3	3	3	3	3	1	1	3	3	3	3	3	3	3	1	3	3	3	3	3	3	3	3	3	3	3	3	3	3	1	3	3	3	3	3	3	3	3	3	1	3	3	3	3
Kukri_c3414_114	1B	142.58	1	1	1	1	1	1	1	3	3	3	1	1	1	1	1	3	1	3	1	1	3	1	1	1	1	1	1	1	1	1	1	1	3	1	1	1	1	1	1	1	1	1	3	1	1	1	1
Kukri_c7936_630	1B	142.58	1	1	1	1	1	1	1	1	3	3	1	1	1	1	1	1	1	3	1	1	1	1	1	1	1	1	1	1	NA	1	1	NA	3	1	1	1	1	1	1	1	1	1	3	1	1	1	1
Kukri_rep_c108883_577	1B	142.58	1	1	1	1	1	1	1	1	3	3	1	1	1	1	1	1	1	3	1	1	1	1	1	1	1	1	1	1	1	1	1	1	3	1	1	1	1	1	1	1	1	1	3	1	1	1	1
Kukri_rep_c68217_1456	1B	142.58	1	1	1	1	1	1	1	1	3	3	1	1	1	1	1	1	1	3	1	1	1	1	1	1	1	1	1	1	1	1	1	1	3	1	1	1	1	1	1	1	1	1	3	1	1	1	1
Ra_c28610_501	1B	142.58	1	1	1	1	1	1	1	1	3	3	1	1	1	1	1	1	1	3	1	1	1	1	1	1	1	1	1	1	1	1	1	1	3	1	1	1	1	1	1	1	1	1	3	1	1	1	1
RAC875_c10050_620	1B	142.58	3	3	3	3	3	3	3	3	1	1	3	3	3	3	3	3	3	1	3	3	3	3	3	3	3	3	3	3	3	3	3	3	1	3	3	3	3	3	3	3	3	3	1	3	3	3	3
RAC875_c21367_209	1B	142.58	3	3	3	3	3	3	3	3	1	1	3	3	3	3	3	3	3	1	3	3	3	3	3	3	3	3	3	3	3	3	3	3	1	3	3	3	3	3	3	3	3	3	1	3	3	3	3
RAC875_c30593_58	1B	142.58	3	3	3	3	3	3	3	3	1	1	3	3	3	3	3	3	3	1	3	3	3	3	3	3	3	3	3	3	3	3	3	3	1	3	3	3	3	3	3	3	3	3	1	3	3	3	3
RAC875_c82649_146	1B	142.58	1	1	1	1	1	1	1	1	3	3	1	1	1	1	1	1	1	3	1	1	1	1	1	1	1	1	1	1	1	1	1	1	3	1	1	1	1	1	1	1	1	1	3	1	1	1	1
RAC875_c90431_188	1B	142.58	1	1	1	1	1	1	1	1	3	3	1	1	1	1	1	1	1	3	1	1	1	1	1	1	1	1	1	1	1	1	1	1	3	1	1	1	1	1	1	1	1	1	3	1	1	1	1
RAC875_rep_c109118_164	1B	142.58	1	1	1	1	1	1	1	1	3	3	1	1	1	1	1	1	1	3	1	1	1	1	1	1	1	1	1	1	1	1	1	1	3	1	1	1	1	1	1	1	1	1	3	1	1	1	1
RAC875_s110045_62	1B	142.58	3	3	3	3	3	3	3	3	1	1	3	3	3	3	3	3	3	1	3	3	3	3	3	3	3	3	3	3	3	3	3	3	1	3	3	3	3	3	3	3	3	3	1	3	3	3	3
RFL_Contig1736_1393	1B	142.58	1	1	1	1	1	1	1	1	3	3	1	1	1	1	1	1	1	3	1	1	1	1	1	1	1	1	1	1	1	1	1	1	3	1	1	1	1	1	1	1	1	1	3	1	1	1	1
TA003412.0312	1B	142.58	3	3	3	3	3	3	3	3	1	1	3	3	3	3	3	3	3	1	3	3	3	3	3	3	3	3	3	3	3	3	3	3	1	3	3	3	3	3	3	3	3	3	1	3	3	3	3
TA003907.0995	1B	142.58	1	1	1	1	1	1	1	1	3	3	1	1	1	1	1	1	1	3	1	1	1	1	1	1	1	1	1	1	1	1	1	1	3	1	1	1	1	1	1	1	1	1	3	1	1	1	1
Tdurum_contig10663_1143	1B	142.58	3	3	3	3	3	3	3	3	1	1	3	3	3	3	3	3	3	1	3	3	3	3	3	3	3	3	3	3	3	3	3	3	1	3	3	3	3	3	3	3	3	3	1	3	3	3	3
Tdurum_contig14418_753	1B	142.58	3	3	3	3	3	3	3	3	1	1	3	3	3	3	3	3	3	1	3	3	3	3	3	3	3	3	3	3	3	3	3	3	1	3	3	3	3	3	3	3	3	3	1	3	3	3	3
Tdurum_contig25384_255	1B	142.58	1	1	1	1	1	1	1	1	3	3	1	1	1	1	1	1	1	3	1	1	1	1	1	1	1	1	1	1	1	1	1	1	3	1	1	1	1	1	1	1	1	1	3	1	1	1	1
Tdurum_contig27840_304	1B	142.58	3	3	3	3	3	3	3	3	1	1	3	3	3	3	3	3	3	1	3	3	3	3	3	3	3	3	3	3	3	3	3	3	1	3	3	3	3	3	3	3	3	3	1	3	3	3	3
Tdurum_contig27840_760	1B	142.58	3	3	3	3	3	3	3	3	1	1	3	3	3	3	3	3	3	1	3	3	3	3	3	3	3	3	3	3	3	3	3	3	1	3	3	3	3	3	3	3	3	3	1	3	3	3	3
Tdurum_contig29891_62	1B	142.58	3	3	3	3	3	3	3	3	1	1	3	3	3	NA	3	3	3	1	3	3	3	3	3	3	3	3	3	3	3	3	3	3	1	3	3	3	3	3	3	3	3	3	1	3	3	3	3
Tdurum_contig34019_260	1B	142.58	1	1	1	1	1	1	1	1	3	3	1	1	1	1	1	1	1	3	1	1	1	1	1	1	1	1	1	1	1	1	1	1	3	1	1	1	1	1	1	1	1	1	3	1	1	1	1
Tdurum_contig34049_100	1B	142.58	1	1	3	3	3	3	3	3	3	3	3	3	3	3	3	3	3	3	3	3	3	3	3	3	3	3	3	3	1	1	1	1	3	3	3	3	3	3	3	3	3	3	3	3	3	3	3
Tdurum_contig50667_306	1B	142.58	3	3	3	3	3	3	3	3	3	3	3	3	3	1	3	1	1	3	1	3	1	3	3	3	3	1	3	3	3	3	3	1	3	3	3	3	1	3	1	1	3	3	3	1	3	3	3
Tdurum_contig9874_391	1B	142.58	3	3	3	3	3	3	3	3	1	1	3	3	3	3	3	3	3	1	3	3	3	3	1	3	3	3	3	3	3	3	3	3	1	3	3	3	3	3	3	3	3	3	1	3	3	3	3
tplb0025b13_352	1B	142.58	3	3	3	3	3	3	3	3	1	1	3	3	3	3	3	3	3	1	3	3	3	3	3	3	3	3	3	3	3	3	3	3	1	3	3	3	3	3	3	3	3	3	1	3	3	3	3
tplb0035p13_560	1B	142.58	3	3	3	3	3	3	3	3	1	1	3	3	3	3	3	3	3	1	3	3	3	3	3	3	3	3	3	3	3	3	3	3	1	3	3	3	3	3	3	3	3	3	1	3	3	3	3
wsnp_Ku_c16938_25916260	1B	142.58	1	3	1	1	1	1	1	3	3	3	1	1	1	1	1	3	1	3	1	1	3	1	1	1	1	1	1	1	1	3	1	1	3	1	1	3	1	1	1	1	1	1	3	1	1	1	1
wsnp_Ku_c8592_14575931	1B	142.58	1	1	1	1	1	1	1	1	3	3	1	1	1	1	1	1	1	3	1	1	1	1	3	1	1	1	1	1	1	1	1	1	3	1	1	1	1	1	1	1	1	1	3	1	1	1	1
Kukri_c5756_302	1B	144.13	1	1	3	3	3	3	3	3	3	3	3	3	3	3	3	3	3	3	3	3	3	3	3	3	3	3	3	3	1	1	1	1	3	3	3	3	3	3	3	3	3	3	3	3	3	3	3
GENE.1756_115	1B	149.76	1	1	1	1	1	3	1	1	3	3	1	1	1	1	1	1	1	3	1	1	1	1	3	1	1	1	1	1	1	1	1	1	3	1	1	1	1	1	1	1	1	1	3	1	3	1	1
wsnp_Ex_c14273_22230844	1B	153.18	1	3	3	1	1	1	1	1	3	3	1	3	1	1	3	3	3	3	1	1	3	3	3	1	3	3	1	3	1	1	3	1	3	1	1	3	1	1	1	3	3	3	3	1	1	1	1
BS00064975_51	1B	165.28	1	3	3	1	1	3	1	3	3	3	1	3	3	NA	1	3	1	3	3	1	3	NA	3	1	3	1	1	3	1	3	3	3	3	1	1	1	3	1	3	3	1	1	3	3	3	1	1
BS00067043_51	1B	165.28	1	3	3	1	1	1	1	3	3	3	1	3	1	3	1	3	1	3	3	1	3	1	3	1	3	1	1	1	1	3	1	3	3	1	1	1	1	1	3	3	1	1	3	3	3	1	1
Ku_c8505_1424	1B	165.28	1	3	3	1	1	3	1	3	3	3	1	3	3	3	1	3	1	3	3	1	3	1	3	1	3	1	1	3	1	3	3	3	3	1	1	1	3	1	3	1	3	3	3	3	3	1	1
RAC875_c51663_87	1B	165.28	1	1	1	1	1	1	1	1	3	3	1	1	1	1	1	1	1	3	1	1	1	1	3	1	1	1	1	1	1	1	1	1	3	1	1	1	1	1	1	1	1	1	3	1	1	1	1
Excalibur_c6726_357	1B	169.71	1	1	1	1	1	1	1	1	3	3	1	1	1	1	1	3	1	3	1	1	3	1	3	1	1	1	1	1	1	1	1	1	3	1	1	1	1	1	1	3	1	1	3	1	1	1	1
GENE.4668_244	1B	169.71	1	NA	NA	1	1	1	1	1	3	3	1	1	1	1	1	3	1	3	1	1	3	1	3	1	1	1	1	1	1	1	1	1	3	1	1	1	1	1	1	3	1	1	3	1	1	1	1
Excalibur_c14273_1928	1B	171.55	1	3	3	1	1	1	1	1	3	3	1	1	1	1	1	1	1	3	1	1	1	1	3	1	1	1	1	1	1	1	1	1	3	1	1	3	1	1	1	1	3	3	3	1	1	1	1
Excalibur_c34148_481	1B	171.55	1	3	3	1	1	1	1	1	3	3	1	1	1	1	1	1	1	3	1	1	1	1	3	1	1	1	1	1	1	1	1	1	3	1	1	3	1	1	1	1	3	3	3	1	1	1	1
Excalibur_c43567_850	1B	172.32	1	1	1	1	1	1	1	1	3	3	1	1	1	1	1	3	1	3	1	1	3	1	3	1	1	1	1	1	1	1	1	1	3	1	1	1	1	1	1	1	1	1	3	1	1	1	1
RAC875_c13585_778	1B	172.32	1	1	1	1	1	1	1	1	3	3	1	1	1	1	1	1	1	3	1	1	1	1	3	1	1	1	1	1	1	1	1	1	3	1	1	1	1	1	1	1	1	1	3	1	1	1	1
Tdurum_contig34049_172	1B	178.6	1	1	1	1	1	1	1	1	1	1	1	3	1	1	1	1	1	1	1	1	1	1	3	1	1	1	1	1	1	1	1	1	1	1	1	1	1	1	1	1	1	1	1	1	1	1	1
GENE.3653_580	1B	181.92	1	1	3	1	1	1	1	3	1	1	1	1	1	1	1	3	1	1	1	1	3	1	1	1	3	1	1	1	1	1	1	1	1	1	1	1	1	1	1	3	1	1	1	1	1	1	1
BobWhite_c26045_230	1B	182.66	3	1	1	3	3	1	3	1	3	3	3	3	1	1	3	3	3	3	1	3	3	3	1	3	1	3	3	1	3	1	1	1	3	3	3	3	1	3	1	3	1	1	3	1	1	3	3
BS00012068_51	1B	182.66	3	1	3	3	3	3	3	3	3	3	3	3	3	3	3	3	3	3	3	3	3	3	3	3	3	3	3	3	3	1	3	3	3	3	3	3	3	3	3	3	3	3	3	3	3	3	3
BS00067003_51	1B	182.66	1	3	3	1	1	3	1	3	3	3	1	1	3	3	1	1	1	3	3	1	1	1	3	1	3	1	1	3	1	3	3	3	3	1	1	1	3	1	3	1	3	3	3	3	3	1	1
Tdurum_contig95654_237	1B	182.66	1	3	3	1	1	3	1	3	3	3	1	3	3	3	1	3	1	3	3	1	3	1	3	1	3	1	1	3	1	3	3	3	3	1	1	1	3	1	3	3	1	1	3	3	3	1	1
IAAV8952	1B	182.93	1	3	1	1	1	1	1	3	1	1	1	3	1	3	1	3	1	1	3	1	3	1	1	1	1	1	1	1	1	3	1	3	1	1	1	1	1	1	3	1	1	1	1	3	3	1	1
RFL_Contig2160_617	1B	182.93	1	3	3	1	1	1	1	3	3	3	1	3	1	3	1	3	1	3	3	1	3	1	3	1	3	1	1	1	1	3	1	3	3	1	1	1	1	1	3	3	1	1	3	3	3	1	1
BS00065844_51	1B	183.39	3	1	1	3	3	1	3	1	3	3	3	1	1	1	3	1	3	3	1	3	1	3	3	3	1	3	3	1	3	1	1	1	3	3	3	3	1	3	1	1	3	1	3	1	1	3	3
GENE.0427_442	1B	183.39	3	3	3	3	3	3	3	3	1	1	3	3	3	3	3	3	3	1	3	3	3	3	1	3	3	3	3	3	3	3	3	3	1	3	3	3	3	3	3	3	3	3	1	3	3	3	3
IACX16577	1B	183.39	1	1	1	1	1	1	1	1	3	3	1	1	1	1	1	1	1	3	1	1	1	1	3	1	1	1	1	1	1	1	1	1	3	1	1	1	1	1	1	1	1	1	3	1	1	1	1
Kukri_c18006_1568	1B	183.39	3	1	1	3	3	1	3	3	3	3	3	3	1	1	3	3	3	3	1	3	3	3	3	3	1	3	3	1	3	1	1	1	3	3	3	3	1	3	1	1	3	1	3	1	1	3	3
RAC875_c8271_1352	1B	183.39	1	3	3	1	1	3	1	1	1	1	1	1	3	3	1	1	1	1	3	1	1	1	1	1	3	1	1	3	1	3	3	3	1	1	1	1	3	1	3	3	1	3	1	3	3	1	1
RAC875_c8271_1469	1B	183.39	3	1	1	3	3	1	3	3	3	3	3	3	1	1	3	3	3	3	1	3	3	3	3	3	1	3	3	1	3	1	1	1	3	3	3	3	1	3	1	1	3	1	3	1	1	3	3
RAC875_c8271_887	1B	183.39	3	1	1	3	3	1	3	3	3	3	3	3	1	1	3	3	3	3	1	3	3	3	3	3	1	3	3	1	3	1	1	1	3	3	3	3	1	3	1	1	3	1	3	1	1	3	3
RAC875_c90169_393	1B	183.39	3	1	1	3	3	3	3	1	3	3	3	1	3	1	3	1	3	3	1	3	1	3	1	3	1	3	3	3	3	1	3	1	3	3	3	3	3	3	1	1	3	3	3	1	1	3	3
Tdurum_contig55639_241	1B	183.39	1	1	1	1	1	1	1	1	1	1	1	1	1	1	1	1	1	3	1	1	1	1	3	1	1	1	1	1	1	1	1	1	1	1	1	1	1	1	1	1	1	1	1	1	1	1	1
wsnp_Ex_c33654_42106735	1B	183.39	1	3	1	1	1	1	1	1	1	1	1	1	1	3	1	1	1	1	3	1	1	1	1	1	1	1	1	1	1	3	1	3	1	1	1	1	1	1	3	1	1	1	1	3	3	1	1
BS00074034_51	1B	184.73	3	3	3	3	3	3	3	1	3	3	3	3	3	1	3	1	3	3	1	3	1	3	3	3	3	3	3	3	3	3	3	1	3	3	3	3	3	3	1	3	3	3	3	1	1	3	3
Excalibur_c5065_566	1B	184.73	3	1	3	3	3	3	3	3	3	3	3	3	3	NA	3	3	3	3	1	3	3	3	3	3	3	3	3	3	3	1	3	1	3	3	3	3	3	3	1	3	3	3	3	1	1	3	3
Kukri_c40439_366	1B	184.73	3	3	3	3	3	3	3	1	3	3	3	3	3	1	3	1	3	3	1	3	1	3	3	3	3	3	3	3	3	3	3	1	3	3	3	3	3	3	1	3	3	1	3	1	1	3	3
Kukri_c8533_1398	1B	184.73	1	3	1	1	1	1	1	3	1	1	1	3	1	3	1	3	1	1	3	1	3	1	1	1	1	1	1	1	1	3	1	3	1	1	1	1	1	1	3	1	1	1	1	3	3	1	1
Ra_c11488_297	1B	184.73	3	1	3	3	3	3	3	3	3	3	3	3	3	1	3	3	3	3	1	3	3	3	3	3	3	3	3	3	3	1	3	1	3	3	3	3	3	3	1	3	3	3	3	1	1	3	3
RAC875_rep_c109416_191	1B	184.73	1	1	3	3	3	3	3	1	3	3	3	3	3	1	3	1	3	3	1	3	1	3	3	3	3	3	3	3	1	1	1	NA	3	3	3	3	3	3	1	3	3	3	3	1	1	3	3
wsnp_Ex_c14832_22953906	1B	184.73	3	1	3	3	3	3	3	3	3	3	3	3	3	1	3	3	3	3	1	3	3	3	3	3	3	3	3	3	3	1	3	1	3	3	3	3	3	3	1	3	3	3	3	1	1	3	3
BS00022255_51	1B	184.87	3	3	1	3	3	1	3	3	3	3	3	3	1	3	3	3	3	3	3	3	3	3	3	3	1	3	3	1	3	3	1	3	3	3	3	3	1	3	3	1	3	1	3	3	3	3	3
Ra_c16879_977	1B	185.32	1	3	3	1	1	3	1	3	3	3	1	3	3	3	1	3	1	3	3	1	3	1	1	1	3	1	1	3	1	3	3	3	3	1	1	1	3	1	3	3	1	3	3	3	3	1	1
Tdurum_contig26281_139	1B	185.32	1	3	3	1	1	3	1	3	3	3	1	3	3	3	1	3	1	3	3	1	3	1	1	1	3	1	1	3	1	3	3	3	3	1	1	1	3	1	3	3	1	3	3	3	3	1	1
CAP8_rep_c9642_82	1B	185.63	1	1	1	1	1	1	1	3	3	3	1	1	1	3	1	3	1	3	3	1	3	1	1	1	1	1	1	1	1	1	1	3	3	1	1	1	1	1	3	1	1	1	3	3	3	1	1
Excalibur_c17202_1833	1B	185.63	1	1	1	1	1	1	1	3	3	3	1	1	1	3	1	3	1	3	3	1	3	1	1	1	1	1	1	1	1	1	1	3	3	1	1	1	1	1	3	1	1	1	3	3	3	1	1
Excalibur_c28016_132	1B	185.63	1	3	3	1	1	3	1	1	3	3	1	1	3	3	1	1	1	3	3	1	1	1	1	1	3	1	1	3	1	3	3	3	3	1	1	1	3	1	3	3	1	3	3	3	3	1	1
IAAV6	1B	185.63	1	3	3	1	1	3	1	3	3	3	1	3	3	3	1	3	1	3	3	1	3	1	1	1	3	1	1	3	1	3	3	3	3	1	1	1	3	1	3	3	1	3	3	3	3	1	1
IACX2935	1B	185.63	1	1	1	1	1	1	1	3	1	1	1	3	1	1	1	3	1	1	1	1	3	1	1	1	1	1	1	1	1	1	1	1	1	1	1	1	1	1	1	1	1	1	1	1	1	1	1
IACX502	1B	185.63	3	1	1	3	3	1	3	1	1	1	3	1	1	1	3	1	3	1	1	3	1	3	3	3	1	3	3	1	3	1	1	1	1	3	3	3	1	3	1	1	3	1	1	1	1	3	3
Ku_c6440_336	1B	185.63	3	1	3	3	3	3	3	3	3	3	3	3	3	1	3	3	3	3	1	3	3	3	3	3	3	3	3	3	3	1	3	1	3	3	3	3	3	3	1	3	3	3	3	1	1	3	3
Kukri_c8255_1324	1B	185.63	1	1	1	1	1	1	1	3	3	3	1	1	1	3	1	3	1	3	3	1	3	1	1	1	1	1	1	1	1	1	1	3	3	1	1	1	1	1	3	1	1	3	3	3	3	1	1
Ra_c29142_340	1B	185.63	1	3	3	1	1	3	1	3	3	3	1	3	3	3	1	3	1	3	3	1	3	1	1	1	3	1	1	3	1	3	3	3	3	1	1	1	3	1	3	3	1	3	3	3	3	1	1
RAC875_c49924_324	1B	185.63	3	1	1	3	3	1	3	1	1	1	3	1	1	1	3	1	3	1	1	3	1	3	1	3	1	3	3	1	3	1	1	1	1	3	3	3	1	3	1	1	3	1	1	1	1	3	3
RAC875_c826_839	1B	185.63	1	1	1	1	1	1	1	3	3	3	1	1	1	3	1	3	1	3	3	1	3	1	1	1	1	1	1	1	1	1	1	3	3	1	1	1	1	1	3	1	1	3	3	3	3	1	1
RFL_Contig1081_570	1B	185.63	1	3	3	1	1	3	1	3	3	3	1	3	3	3	1	3	1	3	3	1	3	1	1	1	3	1	1	3	1	3	3	3	3	1	1	1	3	1	3	3	1	3	3	3	3	1	1
wsnp_Ex_c2111_3963339	1B	185.63	3	3	3	3	3	3	3	1	3	3	3	3	3	1	3	1	3	3	1	3	1	3	3	3	3	3	3	3	3	3	3	NA	3	3	3	3	3	3	1	3	3	1	3	1	1	3	3
wsnp_Ku_c4911_8795151	1B	185.63	1	1	1	1	1	1	1	3	3	3	1	1	1	3	1	3	1	3	3	1	3	1	1	1	1	1	1	1	1	1	1	3	3	1	1	1	1	1	3	1	1	3	3	3	3	1	1
BS00110546_51	1B	186.83	3	3	3	3	3	3	3	3	3	3	3	3	3	3	3	3	3	3	3	3	3	3	3	3	3	3	3	3	3	3	3	3	3	3	3	3	3	3	3	3	3	3	3	3	3	3	3
BS00022902_51	1B	191.51	1	1	3	1	1	1	1	3	3	3	1	1	1	1	1	3	1	3	1	1	3	1	1	1	3	1	1	3	1	1	3	1	3	1	1	1	NA	1	1	1	1	1	3	1	1	1	1
Kukri_c5861_360	1B	191.51	3	3	1	3	3	3	3	1	1	1	3	3	3	3	3	1	3	1	3	3	1	3	3	3	1	3	3	1	3	3	1	3	1	3	3	3	3	3	3	3	3	3	1	3	3	3	3
Kukri_c10100_1557	1B	192.71	1	1	3	3	3	3	3	3	3	3	3	3	3	3	3	3	3	3	3	3	3	3	3	3	3	3	3	3	1	1	1	1	3	3	3	3	3	3	3	3	3	3	3	3	3	3	3
BobWhite_c12695_394	1B	195.12	1	1	1	1	1	1	1	1	3	3	1	1	1	1	1	1	1	3	1	1	1	1	1	1	1	1	1	1	1	1	1	1	3	1	1	1	1	1	1	1	1	1	3	1	1	1	1
BobWhite_c22266_315	1B	195.12	3	3	3	3	3	3	3	1	3	3	3	3	3	3	3	1	3	3	3	3	1	3	1	3	1	3	3	1	3	3	3	3	3	3	3	3	3	3	3	3	3	3	3	3	3	3	3
BobWhite_rep_c49149_530	1B	195.12	1	1	3	3	3	3	3	3	1	1	3	3	3	3	3	3	3	1	3	3	3	3	3	3	3	3	3	3	1	1	1	1	1	3	3	3	3	3	3	3	3	3	1	3	3	3	3
BobWhite_rep_c53595_274	1B	195.12	1	1	1	1	1	1	1	1	3	3	1	1	1	1	1	1	1	3	1	1	1	1	1	1	1	1	1	1	1	1	1	1	3	1	1	1	1	1	1	1	1	1	3	1	1	1	1
BS00004316_51	1B	195.12	3	3	3	3	3	3	3	3	1	1	3	3	3	3	3	3	3	1	3	3	3	3	3	3	3	3	3	3	3	3	3	3	1	3	3	3	3	3	3	3	3	3	1	3	3	3	3
BS00021870_51	1B	195.12	1	1	1	1	1	1	1	1	3	3	1	1	1	1	1	1	1	3	1	1	1	1	1	1	1	1	1	1	1	1	1	1	3	1	1	1	1	1	1	1	1	1	3	1	1	1	1
BS00022507_51	1B	195.12	3	3	1	1	1	1	1	1	3	3	1	1	1	1	1	1	1	3	1	1	1	1	1	1	1	1	1	1	3	3	3	3	3	1	1	1	1	1	1	1	1	1	3	1	1	1	1
BS00022736_51	1B	195.12	1	1	3	3	3	3	3	3	1	1	3	3	3	3	3	3	3	1	3	3	3	3	3	3	3	3	3	3	1	1	1	1	1	3	3	3	3	3	3	3	3	3	1	3	3	3	3
BS00026541_51	1B	195.12	1	1	1	1	1	1	1	1	3	3	1	1	1	1	1	1	1	3	1	1	1	1	1	1	1	1	1	1	1	1	1	1	3	1	1	1	1	1	1	1	1	1	3	1	1	1	1
BS00030733_51	1B	195.12	3	3	3	3	3	3	3	3	1	1	3	3	3	3	3	3	3	1	3	3	3	3	3	3	3	3	3	3	3	3	3	3	1	3	3	3	3	3	3	3	3	3	1	3	3	3	3
BS00031056_51	1B	195.12	3	3	3	3	3	3	3	3	1	1	3	3	3	3	3	3	3	1	3	3	3	3	3	3	3	3	3	3	3	3	3	3	1	3	3	3	3	3	3	3	3	3	1	3	3	3	3
BS00033738_51	1B	195.12	3	3	1	1	1	1	1	1	3	3	1	1	1	1	1	1	1	3	1	1	1	1	1	1	1	1	1	1	3	3	3	3	3	1	1	1	1	1	1	1	1	1	3	1	1	1	1
BS00036866_51	1B	195.12	1	1	1	1	1	1	1	1	3	3	1	1	1	1	1	1	1	3	1	1	1	1	1	1	1	1	1	1	1	1	1	1	3	1	1	1	1	1	1	1	1	1	3	1	1	1	1
BS00040342_51	1B	195.12	1	1	1	1	1	1	1	1	3	3	1	1	1	1	1	1	1	3	1	1	1	1	1	1	1	1	1	1	1	1	1	1	3	1	1	1	1	1	1	1	1	1	3	1	1	1	1
BS00062723_51	1B	195.12	1	1	1	1	1	1	1	1	3	3	1	1	1	1	1	1	1	3	1	1	1	1	1	1	1	1	1	1	1	1	1	1	3	1	1	1	1	1	1	1	1	1	3	1	1	1	1
BS00064750_51	1B	195.12	3	3	3	3	3	3	3	3	1	1	3	3	3	3	3	3	3	1	3	3	3	3	3	3	3	3	3	3	3	3	3	3	1	3	3	3	3	3	3	3	3	3	1	3	3	3	3
BS00064929_51	1B	195.12	1	1	1	1	1	1	1	1	3	3	1	1	1	1	1	1	1	3	1	1	1	1	1	1	1	1	1	1	1	1	1	1	3	1	1	1	1	1	1	1	1	1	3	1	1	1	1
BS00065314_51	1B	195.12	1	1	1	1	1	1	1	1	3	3	1	1	1	1	1	1	1	3	1	1	1	1	1	1	1	1	1	1	1	1	1	1	3	1	1	1	1	1	1	1	1	1	3	1	1	1	1
BS00067169_51	1B	195.12	1	1	1	1	1	1	1	1	3	3	1	1	1	1	1	1	1	3	1	1	1	1	NA	1	1	1	1	1	1	1	1	1	3	1	1	1	1	1	1	1	1	1	3	1	1	1	1
BS00068380_51	1B	195.12	3	3	3	3	3	3	3	3	1	1	3	3	3	3	3	3	3	1	3	3	3	3	3	3	3	3	3	3	3	3	3	3	1	3	3	3	3	3	3	3	3	3	1	3	3	3	3
BS00071903_51	1B	195.12	3	3	3	3	3	3	3	3	1	1	3	3	3	3	3	3	3	1	3	3	3	3	3	3	3	3	3	3	3	3	3	3	1	3	3	3	3	3	3	3	3	3	1	3	3	3	3
BS00073034_51	1B	195.12	3	3	3	3	3	3	3	3	1	1	3	3	3	3	3	3	3	1	3	3	3	3	3	3	3	3	3	3	3	3	3	3	1	3	3	3	3	3	3	3	3	3	1	3	3	3	3
BS00087133_51	1B	195.12	3	3	3	3	3	3	3	3	1	1	3	3	3	3	3	3	3	1	3	3	3	3	3	3	3	3	3	3	3	3	3	3	1	3	3	3	3	3	3	3	3	3	1	3	3	3	3
BS00087444_51	1B	195.12	1	1	1	1	1	1	1	1	3	3	1	1	1	1	1	1	1	3	1	1	1	1	1	1	1	1	1	1	1	1	1	1	3	1	1	1	1	1	1	1	1	1	3	1	1	1	1
BS00088671_51	1B	195.12	3	3	3	3	3	3	3	3	1	1	3	3	3	3	3	3	3	1	3	3	3	3	3	3	3	3	3	3	3	3	3	3	1	3	3	3	3	3	3	3	3	3	1	3	3	3	3
BS00095478_51	1B	195.12	1	1	1	1	1	1	1	1	3	3	1	1	1	1	1	1	1	3	1	1	1	1	1	1	1	1	1	1	1	1	1	1	3	1	1	3	1	1	1	1	1	1	3	1	1	1	1
BS00097523_51	1B	195.12	1	1	1	1	1	1	1	1	3	3	1	1	1	1	1	1	1	3	1	1	1	1	1	1	1	1	1	1	1	1	1	1	3	1	1	1	1	1	1	1	1	1	3	1	1	1	1
BS00098306_51	1B	195.12	1	1	1	1	1	1	1	1	3	3	1	1	1	1	1	1	1	3	1	1	1	1	1	1	1	1	1	1	1	1	1	1	3	1	1	1	1	1	1	1	1	1	3	1	1	1	1
BS00099165_51	1B	195.12	1	1	1	1	1	1	1	1	3	3	1	1	1	1	1	1	1	3	1	1	1	1	1	1	1	1	1	1	1	1	1	1	3	1	1	1	1	1	1	1	1	1	3	1	1	1	1
BS00108806_51	1B	195.12	3	3	3	3	3	3	3	3	3	3	3	3	3	3	3	3	3	3	3	3	3	3	3	3	3	3	3	3	3	3	3	3	3	3	3	3	3	3	3	3	3	3	3	3	3	3	3
BS00109971_51	1B	195.12	3	3	3	3	3	3	3	3	1	1	3	3	3	3	3	3	3	1	3	3	3	3	3	3	3	3	3	3	3	3	3	3	1	3	3	3	3	3	3	3	3	3	1	3	3	3	3
BS00110181_51	1B	195.12	1	1	1	1	1	1	1	1	3	3	1	1	1	1	1	1	1	3	1	1	1	1	1	1	1	1	1	1	1	1	1	1	3	1	1	1	1	1	1	1	1	1	3	1	1	1	1
CAP11_c7652_277	1B	195.12	1	1	1	1	1	1	1	1	1	1	1	1	1	1	1	1	1	1	1	1	1	1	1	1	1	1	1	1	1	1	1	1	1	1	1	3	1	1	1	1	1	1	1	1	1	1	1
CAP12_c2714_164	1B	195.12	1	1	1	1	1	1	1	1	3	3	1	1	1	1	1	1	1	3	1	1	1	1	1	1	1	1	1	1	1	1	1	1	3	1	1	1	1	1	1	1	1	1	3	1	1	1	1
CAP12_c715_102	1B	195.12	1	1	1	1	1	1	1	3	1	1	1	1	1	1	1	3	1	1	1	1	3	1	1	1	1	1	1	1	1	1	1	1	1	1	1	3	1	1	1	1	1	3	1	1	1	1	1
Ex_c3312_446	1B	195.12	3	3	3	3	3	3	3	3	1	1	3	3	3	3	3	3	3	1	3	3	3	3	3	3	3	3	3	3	3	3	3	3	1	3	3	3	3	3	3	3	3	3	1	3	3	3	3
Excalibur_c10528_347	1B	195.12	3	1	3	3	1	1	3	1	1	1	3	1	1	1	3	1	3	1	1	1	1	3	1	3	1	3	3	1	3	1	1	1	1	3	3	1	1	3	1	1	3	3	1	1	1	3	3
Excalibur_c12710_740	1B	195.12	1	1	3	1	1	1	1	1	1	1	1	1	1	1	1	1	1	1	1	1	1	1	1	1	3	1	1	3	1	1	3	1	1	1	1	1	1	1	1	1	1	1	1	1	1	1	1
Excalibur_c18735_1380	1B	195.12	1	1	3	3	3	3	3	3	1	1	3	3	3	3	3	3	3	1	3	3	3	3	3	3	3	3	3	3	1	1	1	1	1	3	3	3	3	3	3	3	3	3	1	3	3	3	3
Excalibur_c43347_322	1B	195.12	3	3	3	3	3	3	3	3	1	1	3	3	3	3	3	3	3	1	3	3	3	3	3	3	3	3	3	3	3	3	3	3	1	3	3	3	3	3	3	3	3	3	1	3	3	3	3
Excalibur_c55348_283	1B	195.12	1	1	1	1	1	1	1	1	3	3	1	1	1	1	1	1	1	3	1	1	1	1	1	1	1	1	1	1	1	1	1	1	3	1	1	1	1	1	1	1	1	1	3	1	1	1	1
Excalibur_rep_c112996_167	1B	195.12	1	1	1	1	1	1	1	1	3	3	1	1	1	1	1	1	1	3	1	1	1	1	1	1	1	1	1	1	1	1	1	1	3	1	1	1	1	1	1	1	1	1	3	1	1	1	1
Excalibur_rep_c113275_136	1B	195.12	1	1	1	1	1	1	1	1	3	3	1	1	1	1	1	1	1	3	1	1	1	1	1	1	1	1	1	1	1	1	1	1	3	1	1	1	1	1	1	1	1	1	3	1	1	1	1
Excalibur_rep_c66394_199	1B	195.12	3	3	1	1	1	3	1	1	3	3	1	1	1	1	1	1	1	3	1	1	1	1	1	1	1	1	1	1	3	3	3	3	3	1	1	1	1	1	1	1	1	1	3	1	1	1	1
GENE.0040_121	1B	195.12	1	1	1	1	1	1	1	1	3	3	1	1	1	1	1	1	1	3	1	1	1	1	1	1	1	1	1	1	1	1	1	1	3	1	1	1	1	1	1	1	1	1	3	1	1	1	1
GENE.0041_486	1B	195.12	1	1	1	1	1	1	1	1	3	3	1	1	1	1	1	1	1	3	1	1	1	1	1	1	1	1	1	1	1	1	1	1	3	1	1	1	1	1	1	1	1	1	3	1	1	1	1
GENE.0189_45	1B	195.12	1	1	1	1	1	1	1	1	3	3	1	1	1	1	1	1	1	3	1	1	1	1	1	1	1	1	1	1	1	1	1	1	3	1	1	1	1	1	1	1	1	1	3	1	1	1	1
GENE.0217_113	1B	195.12	3	3	3	3	3	3	3	3	1	1	3	3	3	3	3	3	3	1	3	3	3	3	3	3	3	3	3	3	3	3	3	3	1	3	3	3	3	3	3	3	3	3	1	3	3	3	3
GENE.0221_100	1B	195.12	1	1	1	1	1	1	1	1	3	3	1	1	1	1	1	1	1	3	1	1	1	1	1	1	1	1	1	1	1	1	1	1	3	1	1	1	1	1	1	1	1	1	3	1	1	1	1
GENE.0332_657	1B	195.12	3	3	3	3	3	3	3	3	1	1	3	3	3	3	3	3	3	1	3	3	3	3	3	3	3	3	3	3	3	3	3	3	1	3	3	3	3	3	3	3	3	3	1	3	3	3	3
GENE.0336_224	1B	195.12	3	3	3	3	3	3	3	3	1	1	3	3	3	3	3	3	3	1	3	3	3	3	3	3	3	3	3	3	3	3	3	3	1	3	3	3	3	3	3	3	3	3	1	3	3	3	3
GENE.0339_174	1B	195.12	3	3	3	3	3	3	3	3	1	1	3	3	3	3	3	3	3	1	3	3	3	3	3	3	3	3	3	3	3	3	3	3	1	3	3	3	3	3	3	3	3	3	1	3	3	3	3
GENE.0433_66	1B	195.12	3	3	1	1	1	1	1	1	3	3	1	1	1	1	1	1	1	3	1	1	1	NA	1	1	1	1	1	1	3	3	3	3	3	1	1	1	1	1	1	1	1	1	3	1	1	1	1
GENE.0456_190	1B	195.12	1	1	1	1	1	1	1	1	3	3	1	1	1	1	1	1	1	3	1	1	1	1	1	1	1	1	1	1	1	1	1	1	3	1	1	1	1	1	1	1	1	1	3	1	1	1	1
GENE.0496_408	1B	195.12	1	1	1	1	1	1	1	1	3	3	1	1	1	1	1	1	1	3	1	1	1	1	1	1	1	1	1	1	1	1	1	1	3	1	1	1	1	1	1	1	1	1	3	1	1	1	1
GENE.0538_65	1B	195.12	1	1	1	1	1	1	1	1	3	3	1	1	1	1	1	1	1	3	1	1	1	1	1	1	1	1	1	1	1	1	1	1	3	1	1	1	1	1	1	1	1	1	3	1	1	1	1
GENE.3075_364	1B	195.12	1	1	1	1	1	1	1	1	3	3	1	1	1	1	1	1	1	3	1	1	1	1	1	1	1	1	1	1	1	1	1	1	3	1	1	1	1	1	1	1	1	1	3	1	1	1	1
IAAV1312	1B	195.12	3	3	3	3	3	3	3	3	1	1	3	3	3	3	3	3	3	3	3	3	3	3	3	3	3	3	3	3	3	3	3	3	1	3	3	3	3	3	3	3	3	3	1	3	3	3	3
IAAV1624	1B	195.12	1	1	1	1	1	1	1	1	3	3	1	1	1	1	1	1	1	3	1	1	1	1	1	1	1	1	1	1	1	1	1	1	3	1	1	1	1	1	1	1	1	1	3	1	1	1	1
IAAV4676	1B	195.12	3	3	1	1	1	1	1	1	3	3	1	1	1	1	1	1	1	3	1	1	1	1	1	1	1	1	1	1	3	3	3	3	3	1	1	1	1	1	1	1	1	1	3	1	1	1	1
IAAV4723	1B	195.12	1	1	3	3	3	3	3	3	1	1	3	3	3	3	3	3	3	1	3	3	3	3	3	3	3	3	3	3	1	1	1	1	1	3	3	3	3	3	3	3	3	3	1	3	3	3	3
IAAV6503	1B	195.12	3	3	3	3	3	3	3	3	1	1	3	3	3	3	3	3	3	1	3	3	3	3	3	3	3	3	3	3	3	3	3	3	1	3	3	3	3	3	3	3	3	3	1	3	3	3	3
IAAV7602	1B	195.12	3	3	3	3	3	3	3	3	1	1	3	3	3	3	3	3	3	1	3	3	3	3	3	3	3	3	3	3	3	3	3	3	1	3	3	3	3	3	3	3	3	3	1	3	3	3	3
IAAV7845	1B	195.12	1	1	1	1	1	1	1	1	3	3	1	1	1	1	1	1	1	3	1	1	1	1	1	1	1	1	1	1	1	1	1	1	3	1	1	1	1	1	1	1	1	1	3	1	1	1	1
IAAV8117	1B	195.12	1	1	1	1	1	1	1	1	3	3	1	1	1	1	1	1	1	3	1	1	1	1	1	1	1	1	1	1	1	1	1	1	3	1	1	1	1	1	1	1	1	1	3	1	1	1	1
IAAV8409	1B	195.12	3	3	1	1	1	1	1	1	3	3	1	1	1	1	1	1	1	3	1	1	1	1	1	1	1	1	1	1	3	3	3	3	3	1	1	1	1	1	1	1	1	1	3	1	1	1	1
IACX16878	1B	195.12	1	1	1	1	1	1	1	1	3	3	1	NA	1	1	1	1	1	3	1	1	1	1	1	1	1	1	1	1	1	1	1	1	3	1	1	1	1	1	1	1	1	1	3	1	1	1	1
IACX20130	1B	195.12	1	1	1	1	1	1	1	1	3	3	1	1	1	1	1	1	1	3	1	1	1	1	1	1	1	1	1	1	1	1	1	1	3	1	1	1	1	1	1	1	1	1	3	1	1	1	1
IACX6862	1B	195.12	1	1	1	1	1	1	1	1	3	3	1	1	1	NA	1	1	1	3	1	1	1	1	1	1	1	1	1	1	1	1	1	1	3	1	1	1	1	1	1	1	1	1	3	1	1	1	1
Jagger_c5906_333	1B	195.12	3	3	3	3	3	3	3	3	1	1	3	3	3	3	3	3	3	1	3	3	3	3	3	3	3	3	3	3	3	3	3	3	1	3	3	3	3	3	3	3	3	3	1	3	3	3	3
JD_c10917_341	1B	195.12	3	3	1	1	1	1	1	1	3	3	1	1	1	1	1	1	1	3	1	1	1	1	1	1	1	1	1	1	3	3	3	3	3	1	1	1	1	1	1	1	1	1	3	1	1	1	1
JD_c10917_403	1B	195.12	3	3	3	3	3	3	3	3	1	1	3	3	3	3	3	3	3	1	3	3	3	3	3	3	3	3	3	3	3	3	3	3	1	3	3	3	3	3	3	3	3	3	1	3	3	3	3
JD_c11817_592	1B	195.12	1	1	3	3	3	3	3	3	1	1	3	3	3	3	3	3	3	1	3	3	3	3	3	3	3	3	3	3	1	1	1	1	1	3	3	3	3	3	3	3	3	3	1	3	3	3	3
JD_c48840_451	1B	195.12	1	3	1	1	1	1	1	1	1	1	1	1	1	1	1	1	1	1	1	1	1	1	1	1	1	1	1	1	1	3	1	1	1	1	1	3	1	1	1	1	1	1	1	1	1	1	1
Ku_c13532_1753	1B	195.12	1	3	1	1	1	1	1	1	3	3	1	1	1	1	1	3	1	3	1	1	3	1	1	1	1	1	1	1	1	3	1	1	3	1	1	3	1	1	1	1	1	1	3	1	1	1	1
Ku_c3695_1696	1B	195.12	3	3	3	3	3	3	3	3	1	1	3	3	3	3	3	3	3	1	3	3	3	3	3	3	3	3	3	3	3	3	3	3	1	3	3	1	3	3	3	3	3	3	1	3	3	3	3
Kukri_c11707_160	1B	195.12	1	1	1	1	1	1	1	1	3	3	1	1	1	1	1	1	1	3	1	1	1	1	1	1	1	1	1	1	1	1	1	1	3	1	1	1	1	1	1	1	1	1	3	1	1	1	1
Kukri_c15526_764	1B	195.12	3	3	3	3	3	3	3	3	1	1	3	3	3	3	3	3	3	1	3	3	3	3	3	3	3	3	3	3	3	3	3	3	1	3	3	3	3	3	3	3	3	3	1	3	3	3	3
Kukri_c15901_1064	1B	195.12	1	1	1	1	1	1	1	1	3	3	1	1	1	1	1	1	1	3	1	1	1	1	1	1	1	1	1	1	1	1	1	1	3	1	1	1	1	1	1	1	1	1	3	1	1	1	1
Kukri_c17055_189	1B	195.12	1	1	1	1	1	1	1	1	3	3	1	1	1	1	1	1	1	3	1	1	1	1	1	1	1	1	1	1	1	1	1	1	3	1	1	1	1	1	1	1	1	1	3	1	1	1	1
Kukri_c18081_1280	1B	195.12	3	3	3	3	3	3	3	3	1	1	3	3	3	3	3	3	3	1	3	3	3	3	3	3	3	3	3	3	3	3	3	3	1	3	3	3	3	3	3	3	3	3	1	3	3	3	3
Kukri_c18081_988	1B	195.12	1	1	1	1	1	1	1	1	3	3	1	1	1	1	1	1	1	3	1	1	1	1	1	1	1	1	1	1	1	1	1	1	3	1	1	1	1	1	1	1	1	1	3	1	1	1	1
Kukri_c23300_267	1B	195.12	1	3	3	1	1	3	1	1	1	1	1	1	3	1	1	1	1	1	1	1	1	1	1	1	3	1	1	3	1	3	3	1	1	1	1	1	3	1	1	3	1	3	1	1	1	1	1
Kukri_c26168_423	1B	195.12	3	3	3	3	3	3	3	3	1	1	3	3	3	3	3	3	3	1	3	3	3	3	3	3	3	3	3	1	3	1	1	3	1	3	3	3	3	3	3	3	3	3	1	3	3	3	3
Kukri_c29541_416	1B	195.12	1	1	1	1	1	1	1	1	3	3	1	1	1	1	1	1	1	3	1	1	1	1	1	1	1	1	1	1	1	1	1	1	3	1	1	1	1	1	1	1	1	1	3	1	1	1	1
Kukri_c30371_173	1B	195.12	3	3	3	3	3	3	3	3	1	1	3	3	3	3	3	3	3	1	3	3	3	3	3	3	3	3	3	3	3	3	3	3	1	3	3	3	3	3	3	3	3	3	1	3	3	3	3
Kukri_c34436_560	1B	195.12	1	1	1	1	1	1	1	1	3	3	1	1	1	1	1	1	1	3	1	1	1	1	1	1	1	1	1	1	1	1	1	1	3	1	1	1	1	1	1	1	1	1	3	1	1	1	1
Kukri_c38845_430	1B	195.12	3	3	1	1	1	1	1	1	3	3	1	1	1	1	1	1	1	3	1	1	1	1	1	1	1	1	1	1	3	3	3	3	3	NA	NA	1	1	1	1	1	1	1	3	1	1	1	1
Kukri_c51925_654	1B	195.12	1	1	1	1	1	1	1	1	3	3	1	NA	1	1	1	1	1	3	1	1	1	1	1	1	1	1	1	1	1	1	1	1	3	1	1	1	1	1	1	1	1	1	3	1	1	1	1
Kukri_c53962_102	1B	195.12	1	1	1	1	1	1	1	1	3	3	1	1	1	1	1	1	1	3	1	1	1	1	1	1	1	1	1	1	1	1	1	1	3	1	1	1	1	1	1	1	1	1	3	1	1	1	1
Kukri_c8943_1381	1B	195.12	3	3	3	3	3	3	3	3	1	1	3	3	3	3	3	3	3	1	3	3	3	3	3	3	3	3	3	3	3	3	3	3	1	3	3	3	3	3	3	3	3	3	1	3	3	3	3
Kukri_rep_c88225_329	1B	195.12	3	3	3	3	3	3	3	3	1	1	3	3	3	3	3	3	3	1	3	3	3	3	3	3	3	3	3	3	3	3	3	3	1	3	3	3	3	3	3	3	3	3	1	3	3	3	3
RAC875_c11123_186	1B	195.12	1	1	1	1	1	1	1	1	3	3	1	1	1	1	1	1	1	3	1	1	1	1	1	1	1	1	1	1	1	1	1	1	3	1	1	1	1	1	1	1	1	1	3	1	1	1	1
RAC875_c1276_717	1B	195.12	1	1	1	1	1	1	1	1	3	3	1	1	1	1	1	1	1	3	1	1	1	1	1	1	1	1	1	1	1	1	1	1	3	1	1	1	1	1	1	1	1	1	3	1	1	1	1
RAC875_c25100_89	1B	195.12	1	1	1	1	1	1	1	1	3	3	1	1	1	1	1	1	1	3	1	1	1	1	1	1	1	1	1	1	1	1	1	1	3	1	1	1	1	1	1	1	1	1	3	1	1	1	1
RAC875_c29054_192	1B	195.12	1	1	1	1	1	1	1	1	1	1	1	1	1	1	1	1	1	1	1	1	1	1	1	1	1	1	1	1	1	1	1	1	3	1	1	1	1	1	1	1	1	1	3	1	1	1	1
RAC875_c3656_1229	1B	195.12	3	3	1	1	1	1	1	1	3	3	1	1	1	1	1	1	1	3	1	1	1	1	1	1	1	1	1	1	3	3	3	3	3	1	1	1	1	1	1	1	1	1	3	1	1	1	1
RAC875_c37857_158	1B	195.12	3	3	3	3	3	3	3	3	1	1	3	3	3	3	3	3	3	1	3	3	3	3	3	3	3	3	3	3	3	3	3	3	1	3	3	3	3	3	3	3	3	3	1	3	3	3	3
RAC875_c46581_420	1B	195.12	1	1	1	1	1	1	1	1	3	3	1	1	1	1	1	1	1	3	1	1	1	1	1	1	1	1	1	1	1	1	1	1	3	1	1	1	1	1	1	1	1	1	3	1	1	1	1
RAC875_c47884_100	1B	195.12	1	1	1	1	1	1	1	1	3	3	1	1	1	1	1	1	1	3	1	1	1	1	1	1	1	1	1	1	1	1	1	1	3	1	1	1	1	1	1	1	1	1	3	1	1	1	1
RAC875_c53593_236	1B	195.12	1	1	1	1	1	1	1	1	3	3	1	1	1	1	1	1	1	3	1	1	1	1	1	1	1	1	1	1	1	1	1	1	3	1	1	1	1	1	1	1	1	1	3	1	1	1	1
RAC875_c63067_283	1B	195.12	1	1	1	1	1	1	1	1	3	3	1	1	1	1	1	1	1	3	1	1	1	1	1	1	1	1	1	1	1	1	1	1	3	1	1	3	1	1	1	1	1	1	3	1	1	1	1
RAC875_c90431_275	1B	195.12	1	3	1	1	1	1	1	1	3	3	1	1	1	1	1	1	1	3	1	1	1	1	1	1	1	1	1	1	1	3	1	1	3	1	1	3	1	1	1	1	1	1	3	1	1	1	1
RAC875_s117310_106	1B	195.12	3	3	3	3	3	3	3	3	1	1	3	3	3	3	3	3	3	1	3	3	3	3	3	3	3	3	3	3	3	3	3	3	1	3	3	3	3	3	3	3	3	3	1	3	3	3	3
RFL_Contig529_963	1B	195.12	1	1	1	1	1	1	1	3	3	3	1	1	1	1	1	3	1	3	1	1	3	1	1	1	3	1	1	3	1	1	3	1	3	1	1	1	1	1	1	1	1	1	3	1	1	1	1
RFL_Contig5444_1284	1B	195.12	1	1	3	3	3	3	3	3	1	1	3	3	3	3	3	3	3	1	3	3	3	3	3	3	3	3	3	3	1	1	1	1	1	3	3	3	3	3	3	3	3	3	1	3	3	3	3
TA002065.1430	1B	195.12	3	3	3	3	3	3	3	3	1	1	3	3	3	3	3	3	3	1	3	3	3	3	3	3	3	3	3	3	3	3	3	3	1	3	3	3	3	3	3	3	3	3	1	3	3	3	3
TA005370.0351	1B	195.12	3	3	3	3	3	3	3	3	1	1	3	3	3	3	3	3	3	1	3	3	3	3	3	3	3	3	3	3	3	3	3	3	1	3	3	3	3	3	3	3	3	3	1	3	3	3	3
TA005390.1205	1B	195.12	3	3	3	3	3	3	3	3	1	1	3	3	3	3	3	3	3	1	3	3	3	3	3	3	3	3	3	3	3	3	3	3	1	3	3	3	3	3	3	3	3	3	1	3	3	3	3
TA005394.0822	1B	195.12	3	3	3	3	3	3	3	3	1	1	3	3	3	3	3	3	3	1	3	3	3	3	3	3	3	3	3	3	3	3	3	3	1	3	3	3	3	3	3	3	3	3	1	3	3	3	3
TA005699.1050	1B	195.12	1	1	3	3	3	3	3	3	1	1	3	3	3	3	3	3	3	1	3	3	3	3	3	3	3	3	3	3	1	1	1	1	1	3	3	3	3	3	3	3	3	3	1	3	3	3	3
TA005710.0827	1B	195.12	1	1	1	1	1	1	1	1	3	3	1	1	1	1	1	1	1	3	1	1	1	1	1	1	1	1	1	1	1	1	1	1	3	1	1	1	1	1	1	1	1	1	3	1	1	1	1
Tdurum_contig11164_316	1B	195.12	3	3	3	3	3	3	3	3	1	1	3	3	3	3	3	3	3	1	3	3	3	3	3	3	3	3	3	3	3	3	3	3	1	3	3	3	3	3	3	3	3	3	1	3	3	3	3
Tdurum_contig11824_281	1B	195.12	3	3	3	3	3	3	3	3	1	1	3	3	3	3	3	3	3	1	3	3	3	3	3	3	3	3	3	3	3	3	3	3	1	3	3	3	3	3	3	3	3	3	1	3	3	3	3
Tdurum_contig12173_284	1B	195.12	1	1	1	1	1	1	1	1	3	3	1	1	1	1	1	1	1	3	1	1	1	1	1	1	1	1	1	1	1	1	1	1	3	1	1	1	1	1	1	1	1	1	3	1	1	1	1
Tdurum_contig12940_191	1B	195.12	3	3	3	3	3	3	3	3	1	1	3	3	3	3	3	3	3	1	3	3	3	3	3	3	3	3	3	3	3	3	3	NA	1	3	3	3	3	3	3	3	3	3	1	3	3	3	3
Tdurum_contig13937_1782	1B	195.12	1	1	1	1	1	1	1	1	3	3	1	1	1	1	1	1	1	3	1	1	1	1	1	1	1	1	1	1	1	1	1	1	3	1	1	1	1	1	1	1	1	1	3	1	1	1	1
Tdurum_contig30113_214	1B	195.12	3	3	1	3	3	1	3	1	3	3	3	1	1	3	3	1	3	3	3	3	1	3	3	3	1	3	3	1	3	3	1	3	3	3	3	3	1	3	3	1	3	1	3	3	3	3	3
Tdurum_contig30712_430	1B	195.12	1	1	1	1	1	1	1	1	3	3	1	1	1	1	1	1	1	3	1	1	1	1	1	1	1	1	1	1	1	1	1	1	3	1	1	1	1	1	1	1	1	1	3	1	1	1	1
Tdurum_contig42092_1047	1B	195.12	1	1	1	1	1	1	1	1	3	3	1	1	1	1	1	1	1	3	1	1	1	1	1	1	1	1	1	1	1	1	1	1	3	1	1	1	1	1	1	1	1	1	3	1	1	1	1
Tdurum_contig45142_240	1B	195.12	3	3	1	3	3	3	3	3	3	3	3	3	3	3	3	3	3	3	3	3	3	3	3	3	3	3	3	3	3	3	3	3	3	3	3	3	3	3	3	3	3	3	3	3	3	3	3
tplb0026b15_350	1B	195.12	1	1	1	1	1	1	1	1	3	3	1	1	1	1	1	1	1	3	1	1	1	1	1	1	1	1	1	1	1	1	1	1	3	1	1	1	1	1	1	1	1	1	3	1	1	1	1
tplb0055p02_1074	1B	195.12	3	3	3	3	3	3	3	3	1	1	3	3	3	3	3	3	3	1	3	3	3	3	3	3	3	3	3	3	3	3	3	3	1	3	3	3	3	3	3	3	3	3	1	3	3	3	3
wsnp_Ex_c12063_19310114	1B	195.12	3	3	1	3	3	1	3	3	1	1	3	3	1	3	3	3	3	1	3	3	3	3	3	3	1	3	3	1	3	3	1	3	1	3	3	3	1	3	3	1	3	1	1	3	3	3	3
wsnp_Ex_c25782_35041189	1B	195.12	3	3	1	3	3	3	3	3	3	3	3	3	1	3	3	3	3	3	3	3	3	3	3	3	1	3	3	1	3	3	1	3	3	3	3	3	1	3	3	1	3	3	3	3	3	3	3
wsnp_JD_rep_c49357_33576509	1B	195.12	1	1	3	1	1	1	1	3	1	1	1	1	1	1	1	3	1	1	1	1	3	1	3	1	3	1	1	1	1	1	1	1	1	1	1	1	1	1	1	1	1	1	1	1	1	1	1
BobWhite_c3771_441	1B	200.42	3	1	3	3	1	1	3	3	3	3	3	1	1	3	3	3	3	3	3	3	3	3	3	3	3	3	3	1	3	1	1	3	3	3	3	1	1	3	3	1	3	3	3	3	1	3	3
wsnp_BE637864B_Ta_1_1	1B	200.42	1	3	1	1	3	3	1	1	1	1	1	3	3	1	1	1	1	1	1	1	1	1	1	1	1	1	1	1	1	3	3	1	1	1	1	3	3	1	1	3	1	1	1	1	3	1	1
RAC875_c79370_378	1B	200.76	1	1	1	1	1	1	1	1	3	3	1	1	1	1	1	1	1	3	1	1	1	1	1	1	1	1	1	1	1	1	1	1	3	1	1	1	1	1	1	1	1	1	3	1	1	1	1
BS00010992_51	1B	201.12	1	3	1	1	1	1	1	1	3	3	1	1	1	1	1	1	1	3	1	1	1	1	1	1	1	1	1	3	1	3	1	1	3	1	1	3	1	1	1	1	1	1	3	1	1	1	1
Excalibur_c20610_251	1B	201.12	1	3	1	1	1	1	1	1	3	3	1	1	1	1	1	1	1	3	1	1	1	1	1	1	1	1	1	1	1	3	1	1	3	1	1	3	1	1	1	1	1	1	3	1	1	1	1
Excalibur_c89515_95	1B	201.12	1	3	1	1	1	1	1	1	3	3	1	1	1	1	1	3	1	3	1	1	3	1	1	1	1	1	1	1	1	3	1	1	3	1	1	3	1	1	1	1	1	1	3	1	1	1	1
GENE.2162_720	1B	201.12	1	3	1	1	1	1	1	1	3	3	1	1	1	1	1	1	1	3	1	1	1	1	1	1	1	1	1	3	1	3	1	1	3	1	1	3	1	1	1	1	1	1	3	1	1	1	1
BobWhite_c13378_662	1B	201.25	3	3	1	1	1	1	1	1	3	3	1	1	1	1	1	1	1	3	1	1	1	1	1	1	1	1	1	1	3	3	3	3	3	1	1	1	1	1	1	1	1	1	3	1	1	1	1
BobWhite_c18208_142	1B	201.25	1	1	1	1	1	1	1	1	3	3	1	NA	1	1	1	1	1	3	1	1	1	1	1	1	1	1	1	1	1	1	1	1	3	1	1	1	1	1	1	1	1	1	3	1	1	1	1
BobWhite_c44165_441	1B	201.25	1	1	1	1	1	1	1	1	3	3	1	1	1	1	1	1	1	3	1	1	1	1	1	1	1	1	1	1	1	1	1	1	3	1	1	1	1	1	1	1	1	1	3	1	1	1	1
BobWhite_c6367_691	1B	201.25	3	3	3	3	3	3	3	3	1	1	3	3	3	3	3	3	3	1	3	3	3	3	3	3	3	3	3	3	3	3	3	3	1	3	3	3	3	3	3	3	3	3	1	3	3	3	3
BobWhite_s63351_73	1B	201.25	1	1	1	1	1	1	1	1	3	3	1	1	1	1	1	1	1	3	1	1	1	1	1	1	1	1	1	1	1	1	1	1	3	1	1	1	1	1	1	1	1	1	3	1	1	1	1
BS00003839_51	1B	201.25	1	3	1	1	1	1	1	3	1	1	1	1	1	1	1	3	1	1	1	1	3	1	1	1	1	1	1	1	1	3	1	1	1	1	1	3	1	1	1	1	1	1	1	1	1	1	1
BS00004637_51	1B	201.25	3	3	1	1	1	1	1	1	3	3	1	1	1	1	1	1	1	3	1	1	1	1	1	1	1	1	1	1	3	3	3	3	3	1	1	1	1	1	1	1	1	1	3	1	1	1	1
BS00004981_51	1B	201.25	1	1	1	1	1	1	1	1	3	3	1	1	1	1	1	1	1	3	1	1	1	1	1	1	1	1	1	1	1	1	1	1	3	1	1	1	1	1	1	1	1	1	3	1	1	1	1
BS00015169_51	1B	201.25	1	1	1	1	1	1	1	1	3	3	1	1	1	1	1	1	1	3	1	1	1	1	1	1	1	1	1	1	1	1	1	1	3	1	1	1	1	1	1	1	1	1	3	1	1	1	1
BS00015528_51	1B	201.25	3	3	3	3	3	3	3	3	1	1	3	3	3	3	3	3	3	1	3	3	3	3	3	3	3	3	3	3	3	3	3	3	1	3	3	3	3	3	3	3	3	3	1	3	3	3	3
BS00021904_51	1B	201.25	3	3	3	3	3	3	3	3	1	1	3	3	3	3	3	3	3	1	3	3	3	3	3	3	3	3	3	3	3	3	3	3	1	3	3	3	3	3	3	3	3	3	1	3	3	3	3
BS00023058_51	1B	201.25	1	3	1	1	1	1	1	3	3	3	1	1	1	1	1	3	1	3	1	1	3	1	1	1	1	1	1	1	1	3	1	1	3	1	1	3	1	1	1	1	1	1	3	1	1	1	1
BS00030667_51	1B	201.25	1	1	1	1	1	1	1	1	3	3	1	1	1	1	1	1	1	3	1	1	1	1	1	1	1	1	1	1	1	1	1	1	3	1	1	1	1	1	1	1	1	1	3	1	1	1	1
BS00049883_51	1B	201.25	3	3	3	3	3	3	3	3	1	1	3	3	3	3	3	3	3	1	3	3	3	3	3	3	3	3	3	3	3	3	3	3	1	3	3	3	3	3	3	3	3	3	1	3	3	3	3
BS00068182_51	1B	201.25	3	3	3	3	3	3	3	3	1	1	3	3	3	3	3	3	3	1	3	3	3	3	1	3	3	3	3	3	3	3	3	3	1	3	3	3	3	3	3	3	3	3	1	3	3	3	3
BS00081969_51	1B	201.25	1	1	1	1	1	1	1	1	3	3	1	1	1	1	1	1	1	3	1	1	1	1	1	1	1	1	1	1	1	1	1	1	3	1	1	1	1	1	1	1	1	1	3	1	1	1	1
BS00083533_51	1B	201.25	3	3	3	3	3	3	3	1	1	1	3	3	3	3	3	1	3	1	3	3	1	3	3	3	3	3	3	3	3	3	3	3	1	3	3	3	3	3	3	3	3	3	1	3	3	3	3
BS00091317_51	1B	201.25	1	1	1	1	1	1	1	1	3	3	1	1	1	1	1	1	1	3	1	1	1	1	1	1	1	1	1	1	1	1	1	1	3	1	1	1	1	1	1	1	1	1	3	1	1	1	1
BS00092426_51	1B	201.25	1	1	1	1	1	1	1	1	3	3	1	1	1	1	1	1	1	3	1	1	1	1	1	1	1	1	1	1	1	1	1	1	3	1	1	1	1	1	1	1	1	1	3	1	1	1	1
BS00095477_51	1B	201.25	3	3	3	3	3	3	3	3	1	1	3	3	3	3	3	3	3	1	3	3	3	3	3	3	3	3	3	3	3	3	3	3	1	3	3	1	3	3	3	3	3	3	1	3	3	3	3
BS00098308_51	1B	201.25	3	3	3	3	3	3	3	3	1	1	3	3	3	3	3	3	3	1	3	3	3	3	3	3	3	3	3	3	3	3	3	3	1	3	3	3	3	3	3	3	3	3	1	3	3	3	3
BS00104686_51	1B	201.25	3	3	3	3	3	3	3	3	1	1	3	3	3	3	3	3	3	1	3	3	3	3	3	3	3	3	3	3	3	3	3	3	1	3	3	3	3	3	3	3	3	3	1	3	3	3	3
BS00110120_51	1B	201.25	3	3	3	3	3	3	3	3	1	1	3	3	3	3	3	3	3	1	3	3	3	3	3	3	3	3	3	3	3	3	3	3	1	3	3	3	3	3	3	3	3	3	1	3	3	3	3
D_GBUVHFX02IUW4W_159	1B	201.25	3	3	3	3	3	3	3	3	1	1	3	3	3	3	3	3	3	1	3	3	3	3	3	3	3	3	3	3	3	3	3	3	1	3	3	3	3	3	3	3	3	3	1	3	3	3	3
Excalibur_c2016_292	1B	201.25	1	1	1	1	1	1	1	1	3	3	1	1	1	1	1	1	1	3	1	1	1	NA	1	1	1	1	1	1	1	1	1	1	3	1	1	1	1	1	1	1	1	1	3	1	1	1	1
Excalibur_c24828_1288	1B	201.25	3	3	3	3	3	3	3	3	1	1	3	3	3	3	3	3	3	1	3	3	3	3	3	3	3	3	3	3	3	3	3	3	1	3	3	3	3	3	3	3	3	3	1	3	3	3	3
Excalibur_c25624_86	1B	201.25	1	1	1	1	1	1	1	1	3	3	1	1	1	1	1	1	1	3	1	1	1	1	1	1	1	1	1	1	1	1	1	1	3	1	1	1	1	1	1	1	1	1	3	1	1	1	1
Excalibur_c43347_79	1B	201.25	1	1	1	1	1	1	1	1	3	3	1	1	1	1	1	1	1	3	1	1	1	1	1	1	1	1	1	1	1	1	1	1	3	1	1	1	1	1	1	1	1	1	3	1	1	1	1
GENE.0025_120	1B	201.25	1	1	1	1	1	1	1	1	3	3	1	1	1	1	1	1	1	3	1	1	1	1	1	1	1	1	1	1	1	1	1	1	3	1	1	1	1	1	1	1	1	1	3	1	1	1	1
GENE.0032_951	1B	201.25	1	1	1	1	1	1	1	1	3	3	1	1	1	1	1	1	1	3	1	1	1	1	1	1	1	1	1	1	1	1	1	1	3	1	1	1	1	1	1	1	1	1	3	1	1	1	1
GENE.0189_307	1B	201.25	1	1	1	1	1	1	1	1	3	3	1	1	1	1	1	1	1	3	1	1	1	1	1	1	1	1	1	1	1	1	1	1	3	1	1	1	1	1	1	1	1	1	3	1	1	1	1
GENE.0254_122	1B	201.25	1	1	1	1	1	1	1	1	3	NA	1	1	1	1	1	1	1	NA	1	1	1	1	1	1	1	1	1	1	1	1	1	1	3	1	1	1	1	1	1	1	1	1	3	1	1	1	1
GENE.2162_650	1B	201.25	3	3	3	3	3	3	3	3	1	1	3	3	3	3	3	3	3	1	3	3	3	3	3	3	3	3	3	3	3	3	3	3	1	3	3	3	3	3	3	3	3	3	1	3	3	3	3
GENE.4436_150	1B	201.25	3	3	1	1	1	1	1	1	3	3	1	1	1	1	1	1	1	3	1	1	1	1	1	1	1	1	1	1	3	3	3	3	3	1	1	1	1	1	1	1	1	1	3	1	1	1	1
IAAV2324	1B	201.25	1	3	1	1	1	1	1	1	3	3	1	1	1	1	1	1	1	3	1	1	1	1	1	1	1	1	1	1	1	3	1	1	3	1	1	3	1	1	1	1	1	1	3	1	1	1	1
IAAV2773	1B	201.25	1	1	1	1	1	1	1	1	3	3	1	1	1	1	1	1	1	3	1	1	1	1	1	1	1	1	1	1	1	1	1	1	3	1	1	1	1	1	1	1	1	1	3	1	1	1	1
IAAV4349	1B	201.25	3	3	3	3	3	3	3	3	1	1	3	3	3	3	3	3	3	1	3	3	3	3	3	3	3	3	3	3	3	3	3	3	1	3	3	1	3	3	3	3	3	3	1	3	3	3	3
IAAV4825	1B	201.25	3	3	3	3	3	3	3	3	1	1	3	3	3	3	3	3	3	1	3	3	3	3	3	3	3	3	3	3	3	3	3	3	1	3	3	3	3	3	3	3	3	3	1	3	3	3	3
IAAV5957	1B	201.25	1	1	1	1	1	1	1	1	3	3	1	1	1	1	1	1	1	3	1	1	1	NA	1	1	1	1	1	1	1	1	1	1	3	1	1	1	1	1	1	1	1	1	3	1	1	1	1
IAAV6464	1B	201.25	1	3	1	1	1	1	1	1	3	3	1	1	1	1	1	1	1	3	1	1	1	1	1	1	1	1	1	1	1	3	1	1	3	1	1	3	1	1	1	1	1	1	3	1	1	1	1
IAAV7043	1B	201.25	1	3	1	1	1	1	1	1	3	3	1	1	1	1	1	3	1	3	1	1	3	1	1	1	1	1	1	1	1	3	1	1	3	1	1	3	1	1	1	1	1	1	3	1	1	1	1
IAAV7575	1B	201.25	1	3	1	1	1	1	1	3	3	3	1	NA	1	1	1	3	1	3	1	1	3	1	1	1	1	1	1	1	1	3	1	1	3	1	1	3	1	1	1	1	1	1	3	1	1	1	1
IAAV7611	1B	201.25	3	3	3	3	3	3	3	3	1	1	3	3	3	3	3	3	3	1	3	3	3	3	3	3	3	3	3	3	3	3	3	3	1	3	3	3	3	3	3	3	3	3	1	3	3	3	3
IAAV8003	1B	201.25	1	1	1	1	1	1	1	1	3	3	1	1	1	1	1	1	1	3	1	1	1	1	1	1	1	1	1	1	1	1	1	1	3	1	1	1	1	1	1	1	1	1	3	1	1	1	1
IACX13378	1B	201.25	3	1	3	3	3	3	3	1	1	1	3	3	3	3	3	1	3	1	3	3	1	3	3	3	3	3	3	3	3	1	3	3	1	3	3	1	3	3	3	3	3	3	1	3	3	3	3
IACX14648	1B	201.25	3	3	3	3	3	3	3	3	1	1	3	3	3	3	3	3	3	1	3	3	3	3	3	3	3	3	3	3	3	3	3	3	1	3	3	3	3	3	3	3	3	3	1	3	3	3	3
IACX20344	1B	201.25	1	1	1	1	1	1	1	1	3	3	1	NA	1	1	1	1	1	3	1	1	1	NA	1	1	1	1	1	1	1	1	1	1	3	1	1	1	1	1	1	1	1	1	3	1	1	1	1
IACX3431	1B	201.25	1	1	1	1	1	1	1	1	3	3	1	1	1	1	1	1	1	3	1	1	1	1	1	1	1	1	1	1	1	1	1	1	3	1	1	1	1	1	1	1	1	1	3	1	1	1	1
IACX5970	1B	201.25	1	3	1	1	1	1	1	3	1	1	1	1	1	1	1	3	1	1	1	1	3	1	1	1	1	1	1	1	1	3	1	1	1	1	1	3	1	1	1	1	1	1	1	1	1	1	1
IACX6397	1B	201.25	1	1	1	1	1	1	1	1	3	3	1	1	1	1	1	1	1	3	1	1	1	1	1	1	1	1	1	1	1	1	1	1	3	1	1	1	1	1	1	1	1	1	3	1	1	1	1
IACX6800	1B	201.25	1	1	1	1	1	1	1	1	3	3	1	1	1	1	1	1	1	3	1	1	1	1	1	1	1	1	1	1	1	1	1	1	3	1	1	1	1	1	1	1	1	1	3	1	1	1	1
JD_c2439_468	1B	201.25	3	3	1	1	1	1	1	1	3	3	1	1	1	1	1	1	1	3	1	1	1	1	1	1	1	1	1	1	3	3	3	3	3	1	1	1	1	1	1	1	1	1	3	1	1	1	1
Ku_c11706_149	1B	201.25	3	1	3	3	3	3	3	3	1	1	3	3	3	3	3	1	3	1	3	3	1	3	3	3	3	3	3	3	3	1	3	3	1	3	3	1	3	3	3	3	3	3	1	3	3	3	3
Ku_c12783_286	1B	201.25	3	3	3	3	3	3	3	3	1	1	3	3	3	3	3	3	3	1	3	3	3	3	3	3	3	3	3	3	3	3	3	3	1	3	3	3	3	3	3	3	3	3	1	3	3	3	3
Ku_c58871_938	1B	201.25	3	3	3	3	3	3	3	3	3	3	3	3	3	3	3	3	3	3	3	3	3	3	3	3	3	3	3	3	3	3	3	3	3	3	3	1	3	3	3	3	3	3	3	3	3	3	3
Ku_c7557_607	1B	201.25	3	1	3	3	3	3	3	3	1	1	3	3	3	3	3	3	3	1	3	3	3	3	3	3	3	3	3	3	3	1	3	3	1	3	3	1	3	3	3	3	3	3	1	3	3	3	3
Kukri_c18052_356	1B	201.25	3	1	3	3	3	3	3	1	3	3	3	3	3	3	3	1	3	3	3	3	1	3	3	3	3	3	3	3	3	1	3	3	3	3	3	1	3	3	3	3	3	3	3	3	3	3	3
Kukri_c18305_873	1B	201.25	1	1	1	1	1	1	1	1	3	3	1	1	1	1	1	1	1	3	1	1	1	1	1	1	1	1	1	1	1	1	1	1	3	1	1	1	1	1	1	1	1	1	3	1	1	1	1
Kukri_c20180_112	1B	201.25	1	1	1	1	1	1	1	1	3	3	1	1	1	1	1	1	1	3	1	1	1	1	1	1	1	1	1	1	1	1	1	1	3	1	1	1	1	1	1	1	1	1	3	1	1	1	1
Kukri_c24120_83	1B	201.25	1	1	1	1	1	1	1	1	1	1	1	1	1	1	1	1	1	1	1	1	1	1	1	1	1	1	1	1	1	1	1	1	1	1	1	3	1	1	1	1	1	1	1	1	1	1	1
Kukri_c26973_189	1B	201.25	1	1	1	1	1	1	1	3	3	3	1	1	1	1	1	3	1	3	1	1	3	1	1	1	1	1	1	1	1	1	1	1	3	1	1	3	1	1	1	1	1	1	3	1	1	1	1
Kukri_c31349_1542	1B	201.25	3	3	3	3	1	3	3	3	1	1	3	3	3	3	3	3	3	1	3	3	3	3	3	3	3	3	3	3	3	3	3	3	1	3	3	3	1	3	3	3	3	3	1	3	3	3	3
Kukri_c34902_520	1B	201.25	1	1	1	1	1	1	1	1	3	3	1	1	1	1	1	1	1	3	1	1	1	1	1	1	1	1	1	1	1	1	1	1	3	1	1	1	1	1	1	1	1	1	3	1	1	1	1
Kukri_c42522_155	1B	201.25	3	3	3	3	3	3	3	3	1	1	3	3	3	3	3	3	3	1	3	3	3	3	3	3	3	3	3	1	3	3	3	3	1	3	3	3	3	3	3	3	3	3	1	3	3	3	3
Kukri_c5299_462	1B	201.25	1	1	1	1	1	1	1	1	3	3	1	1	1	1	1	1	1	3	1	1	1	1	1	1	1	1	1	1	1	1	1	1	3	1	1	1	1	1	1	1	1	1	3	1	1	1	1
Kukri_c6027_66	1B	201.25	1	1	1	1	1	1	1	1	1	1	1	1	1	1	1	1	1	1	1	1	1	1	1	1	1	1	1	1	1	1	1	1	1	1	1	3	1	1	1	1	1	1	1	1	1	1	1
Kukri_c7129_227	1B	201.25	3	3	3	3	3	3	3	3	1	1	3	3	3	3	3	3	3	1	3	3	3	3	3	3	3	3	3	3	3	3	3	3	1	3	3	3	3	3	3	3	3	3	1	3	3	3	3
Kukri_c7886_195	1B	201.25	1	1	1	1	1	1	1	1	3	3	1	1	1	1	1	1	1	3	1	1	1	1	1	1	1	1	1	1	1	1	1	1	3	1	1	1	1	1	1	1	1	1	3	1	1	1	1
Kukri_c81766_107	1B	201.25	3	1	3	3	3	3	3	1	3	3	3	3	3	3	3	1	3	3	3	3	1	3	3	3	3	3	3	3	3	1	3	3	3	3	3	1	3	3	3	3	3	3	3	3	3	3	3
Kukri_c8390_712	1B	201.25	1	1	1	1	1	1	1	1	1	3	1	3	1	1	1	1	1	1	1	1	1	1	1	1	1	1	1	1	1	1	1	1	1	1	1	1	1	1	1	1	1	1	1	1	1	1	1
Kukri_c9105_1184	1B	201.25	3	3	3	3	3	3	3	3	1	1	3	3	3	3	3	3	3	1	3	3	3	3	3	3	3	3	3	3	3	3	3	3	1	3	3	3	3	3	3	3	3	3	1	3	3	3	3
Kukri_rep_c112099_98	1B	201.25	3	3	3	3	3	3	3	3	3	3	3	3	3	3	3	3	3	3	3	3	3	3	3	3	3	3	3	3	3	3	3	3	3	3	3	1	3	3	3	3	3	3	3	3	3	3	3
Kukri_rep_c115647_349	1B	201.25	1	1	1	1	1	1	1	1	3	3	1	1	1	NA	1	1	1	3	1	1	1	1	1	1	1	1	1	1	1	1	1	1	3	1	1	1	1	1	1	1	1	1	3	1	1	1	1
Ra_c71421_387	1B	201.25	3	3	3	3	3	3	3	3	3	3	3	3	3	3	3	3	3	3	3	3	3	3	3	3	3	3	3	3	3	3	3	3	3	3	3	1	3	3	3	3	3	3	3	3	3	3	3
RAC875_c50407_177	1B	201.25	1	1	1	1	1	1	1	1	3	3	1	1	1	1	1	1	1	3	1	1	1	1	1	1	1	1	1	1	1	1	1	1	3	1	1	1	1	1	1	1	1	1	3	1	1	1	1
RAC875_c6825_202	1B	201.25	1	1	1	1	1	1	1	1	3	3	1	1	1	1	1	1	1	3	1	1	1	1	1	1	1	1	1	1	1	1	1	1	3	1	1	1	1	1	1	1	1	1	3	1	1	1	1
RFL_Contig1952_781	1B	201.25	1	1	1	1	1	1	1	1	3	3	1	1	1	1	1	1	1	3	1	1	1	1	1	1	1	1	1	1	1	1	1	1	3	1	1	1	1	1	1	1	1	1	3	1	1	1	1
TA003169.1042	1B	201.25	3	3	3	3	3	3	3	3	1	1	3	3	3	3	3	3	3	1	3	3	3	3	3	3	3	3	3	3	3	3	3	3	1	3	3	3	3	3	3	3	3	3	1	3	3	3	3
TA003421.0429	1B	201.25	1	3	1	1	1	1	1	1	1	1	1	1	1	1	1	1	1	1	1	1	1	1	1	1	1	1	1	1	1	3	1	1	1	1	1	3	1	1	1	1	1	1	1	1	1	1	1
TA004235.0297	1B	201.25	3	3	3	3	3	3	3	3	1	1	3	3	3	3	3	3	3	1	3	3	3	3	3	3	3	3	3	3	3	3	3	3	1	3	3	3	3	3	3	3	3	3	1	3	3	3	3
Tdurum_contig100344_160	1B	201.25	1	1	1	1	1	1	1	3	3	3	1	1	1	1	1	3	1	3	1	1	3	1	1	1	1	1	1	1	1	1	1	1	3	1	1	1	1	1	1	1	1	1	3	1	1	1	1
Tdurum_contig100344_184	1B	201.25	1	1	1	1	1	1	1	3	3	3	1	1	1	1	1	3	1	3	1	1	3	1	1	1	1	1	1	1	1	1	1	1	3	1	1	1	1	1	1	1	1	1	3	1	1	1	1
Tdurum_contig10663_267	1B	201.25	1	1	1	1	1	1	1	1	3	3	1	1	1	1	1	1	1	3	1	1	1	1	1	1	1	1	1	1	1	1	1	1	3	1	1	1	1	1	1	1	1	1	3	1	1	1	1
Tdurum_contig11334_554	1B	201.25	1	1	1	1	1	1	1	1	3	3	1	1	1	1	1	1	1	3	1	1	1	1	1	1	1	1	1	1	1	1	1	1	3	1	1	1	1	1	1	1	1	1	3	1	1	1	1
Tdurum_contig11442_930	1B	201.25	3	3	3	3	3	3	3	3	1	1	3	3	3	3	3	3	3	1	3	3	3	3	3	3	3	3	3	3	3	3	3	3	1	3	3	3	3	3	3	3	3	3	1	3	3	3	3
Tdurum_contig11824_416	1B	201.25	3	3	3	3	3	3	3	3	1	1	3	3	3	3	3	3	3	1	3	3	3	3	3	3	3	3	3	3	3	3	3	3	1	3	3	3	3	3	3	3	3	3	1	3	3	3	3
Tdurum_contig13709_317	1B	201.25	1	1	1	1	1	1	1	1	3	3	1	1	1	1	1	1	1	3	1	1	1	1	1	1	1	1	1	1	1	1	1	1	3	1	1	1	1	1	1	1	1	1	3	1	1	1	1
Tdurum_contig25732_112	1B	201.25	1	1	1	1	1	1	1	1	3	3	1	1	1	1	1	1	1	3	1	1	1	1	1	1	1	1	1	1	1	1	1	1	3	1	1	1	1	1	1	1	1	1	3	1	1	1	1
Tdurum_contig34379_237	1B	201.25	3	3	3	3	3	3	3	3	1	1	3	3	3	3	3	3	3	1	3	3	3	3	3	3	3	3	3	3	3	3	3	3	1	3	3	3	3	3	3	3	3	3	1	3	3	3	3
Tdurum_contig44861_1253	1B	201.25	1	1	1	1	1	1	1	1	3	3	1	1	1	1	1	1	1	3	1	1	1	1	3	1	1	1	1	1	1	1	1	1	3	1	1	1	1	1	1	1	1	1	3	1	1	1	1
Tdurum_contig9874_547	1B	201.25	3	3	3	3	3	3	3	3	1	1	3	3	3	3	3	3	3	1	3	3	3	3	1	3	3	3	3	3	3	3	3	3	1	3	3	3	3	3	3	3	3	3	1	3	3	3	3
tplb0038o14_241	1B	201.25	3	3	3	3	3	3	3	3	1	1	3	3	3	3	3	3	3	1	3	3	3	3	3	3	3	3	3	3	3	3	3	3	1	3	3	3	3	3	3	3	3	3	1	3	3	3	3
wsnp_Ex_c18733_27607958	1B	201.25	1	3	1	1	1	1	1	3	3	3	1	1	1	1	1	3	1	3	1	1	3	1	1	1	1	1	1	1	1	3	1	1	3	1	1	3	1	1	1	1	1	1	3	1	1	1	1
wsnp_Ra_rep_c74968_72704437	1B	201.25	3	1	3	3	3	3	3	1	3	3	3	3	3	3	3	1	3	3	3	3	1	3	3	3	3	3	3	3	3	1	3	3	3	3	3	1	3	3	3	3	3	3	3	3	3	3	3
BS00013901_51	1B	201.43	3	3	3	3	3	3	3	3	1	1	3	3	3	3	3	3	3	1	3	3	3	3	3	3	3	3	3	3	3	3	3	3	1	3	3	3	3	3	3	3	3	3	1	3	3	3	3
BS00022625_51	1B	201.43	3	3	3	3	3	3	3	3	1	1	3	3	3	3	3	3	3	1	3	1	3	3	3	3	3	3	3	1	3	3	3	3	1	3	3	3	3	3	3	3	3	3	1	3	3	3	3
BS00022648_51	1B	201.43	3	3	3	3	3	3	3	3	3	3	3	3	3	3	3	3	3	3	3	3	3	3	3	3	3	3	3	3	3	3	3	3	3	3	3	3	3	3	3	3	3	3	3	3	3	3	3
BS00022690_51	1B	201.43	3	3	3	3	3	3	3	3	3	3	3	3	3	3	3	3	3	3	3	3	3	3	3	3	3	3	3	3	3	3	3	3	3	3	3	3	3	3	3	3	3	3	3	3	3	3	3
BS00062632_51	1B	201.43	3	3	3	3	3	3	3	3	3	3	3	3	3	3	3	3	3	3	3	3	3	3	3	3	3	3	3	3	3	3	3	3	3	3	3	3	3	3	3	3	3	3	3	3	3	3	3
BS00093736_51	1B	201.43	3	3	3	3	3	3	3	3	1	1	3	3	3	3	3	3	3	1	3	3	3	3	3	3	3	3	3	3	3	3	3	3	1	3	3	3	3	3	3	3	3	3	1	3	3	3	3
IAAV2452	1B	201.43	3	3	3	3	3	3	3	3	1	1	3	3	3	3	3	3	3	1	3	3	3	3	3	3	3	3	3	3	3	3	3	3	1	3	3	3	3	3	3	3	3	3	1	3	3	3	3
IAAV3828	1B	201.43	3	3	3	3	3	3	3	3	1	1	3	3	3	3	3	3	3	1	3	3	3	3	3	3	3	3	3	3	NA	3	3	NA	1	3	3	3	3	3	3	3	3	3	1	3	3	3	3
IAAV4985	1B	201.43	1	1	1	1	1	1	1	1	3	3	1	1	1	1	1	1	1	3	1	3	1	1	1	1	1	1	1	3	1	1	1	1	3	1	1	1	1	1	1	1	1	1	3	1	1	1	1
Ku_c66951_958	1B	201.43	1	3	1	1	1	1	1	1	3	3	1	1	1	1	1	1	1	3	1	1	1	1	1	1	1	1	1	3	1	3	1	1	3	1	1	3	1	1	1	1	1	1	3	1	1	1	1
Kukri_c1853_1975	1B	201.43	3	3	3	3	3	3	3	3	1	1	3	NA	3	3	3	3	3	1	3	3	3	3	3	3	3	3	3	1	3	3	3	3	1	3	3	3	3	3	3	3	3	3	1	3	3	3	3
Kukri_c7647_1122	1B	201.43	1	3	NA	1	1	1	1	1	3	3	1	1	1	1	1	1	1	3	1	1	1	1	1	1	1	1	1	1	1	3	1	1	3	1	1	1	1	1	1	1	1	1	3	1	1	1	1
RAC875_c10659_570	1B	201.43	1	3	1	1	1	1	1	1	3	3	1	1	1	1	1	1	1	3	1	1	1	1	1	1	1	1	1	1	1	3	1	1	3	1	1	1	1	1	1	1	1	1	3	1	1	1	1
RAC875_c14902_256	1B	201.43	1	1	1	1	1	1	1	1	3	3	1	1	1	1	1	1	1	3	1	1	1	1	1	1	1	1	1	1	1	1	1	1	3	1	1	1	1	1	1	1	1	1	3	1	1	1	1
RAC875_c30381_573	1B	201.43	3	3	3	3	3	3	3	1	1	3	3	3	3	3	3	1	3	3	3	1	1	3	1	3	1	3	3	3	3	3	3	3	3	3	3	3	3	3	3	3	3	3	3	3	3	3	3
Tdurum_contig20702_326	1B	201.43	3	3	3	3	3	3	3	3	3	3	3	3	3	3	3	3	3	3	3	3	3	3	3	3	3	3	3	3	3	3	3	3	3	3	3	3	3	3	3	3	3	3	3	3	3	3	3
wsnp_JD_rep_c62985_40164465	1B	201.43	3	3	3	3	3	3	3	3	1	1	3	3	3	3	3	3	3	1	3	1	3	3	3	3	3	3	3	1	3	3	3	3	1	3	3	3	3	3	3	3	3	3	1	3	3	3	3
BobWhite_c39153_131	1B	202.06	3	1	3	3	3	3	3	1	1	1	3	3	3	3	3	1	3	1	3	3	1	3	3	3	3	3	3	3	3	1	3	3	1	3	3	1	3	3	3	3	3	3	1	3	3	3	3
BS00009921_51	1B	202.06	1	1	1	1	1	1	1	1	1	1	1	1	1	1	1	1	1	1	1	1	1	1	1	1	1	1	1	1	1	1	1	1	1	1	1	1	1	1	1	1	1	1	1	1	1	1	1
BS00049927_51	1B	202.06	3	1	3	3	3	3	3	1	1	1	3	3	3	3	3	1	3	1	3	3	1	3	3	3	3	3	3	3	3	1	3	3	1	3	3	1	3	3	3	3	3	3	1	3	3	3	3
Excalibur_c56657_282	1B	202.06	3	3	3	3	1	1	3	3	3	3	3	1	1	1	3	3	3	3	1	3	3	3	3	3	3	3	3	1	3	3	1	1	1	3	3	1	1	3	1	1	3	3	1	1	1	3	3
IACX8373	1B	202.06	1	1	1	1	1	1	1	1	1	1	1	1	1	1	1	1	1	1	1	1	1	1	1	1	1	1	1	1	1	1	1	1	1	1	1	1	1	1	1	1	1	1	1	1	1	1	1
Kukri_c5098_1902	1B	202.06	3	1	3	3	3	3	3	3	3	3	3	3	3	1	3	3	3	3	1	3	3	3	3	3	3	3	3	1	3	1	3	1	3	3	3	1	3	3	1	3	3	3	3	1	3	3	3
TA015141.0717	1B	202.06	1	1	1	1	3	3	1	1	1	1	1	3	3	3	1	1	1	1	3	1	1	1	1	1	1	1	1	3	1	1	3	3	3	1	1	3	3	1	3	3	1	1	3	3	3	1	1
wsnp_JD_c4444_5575748	1B	202.06	1	1	1	1	3	3	1	1	1	1	1	3	3	3	1	1	1	1	3	1	1	1	1	1	1	1	1	3	1	1	3	3	3	1	1	3	3	1	3	3	1	1	3	3	3	1	1
GENE.2162_749	1B	204.86	3	1	3	3	3	3	3	3	1	1	3	3	3	3	3	3	3	1	3	3	3	3	3	3	3	3	3	1	3	1	3	3	1	3	3	1	3	3	3	3	3	3	1	3	3	3	3
Excalibur_c19291_571	1B	205.07	1	1	1	1	1	1	1	1	3	3	1	1	1	1	1	1	1	3	1	1	1	1	1	1	1	1	1	1	1	1	1	1	3	1	1	1	1	1	1	1	1	1	3	1	1	1	1
IACX3433	1B	205.07	3	3	3	3	3	3	3	3	1	1	3	3	3	3	3	3	3	1	3	3	3	3	3	3	3	3	3	3	3	3	3	3	1	3	3	3	3	3	3	3	3	3	1	3	3	3	3
Jagger_c7740_104	1B	205.07	3	3	3	3	3	3	3	3	1	1	3	3	3	3	3	3	3	1	3	3	3	3	3	3	3	3	3	3	3	3	3	3	1	3	3	3	3	3	3	3	3	3	1	3	3	3	3
Kukri_rep_c104321_201	1B	205.07	3	3	3	3	3	3	3	3	1	1	3	3	3	3	3	3	3	1	3	3	3	3	3	3	3	3	3	3	3	3	3	3	1	3	3	3	3	3	3	3	3	3	1	3	3	3	3
Kukri_rep_c71840_754	1B	205.07	3	3	3	3	3	3	3	3	1	1	3	3	3	3	3	3	3	1	3	3	3	3	3	3	3	3	3	3	3	3	3	3	1	3	3	3	3	3	3	3	3	3	1	3	3	3	3
RAC875_rep_c77710_180	1B	205.07	3	3	3	3	3	3	3	3	1	1	3	3	3	3	3	3	3	1	3	3	3	3	3	3	3	3	3	3	3	3	3	3	1	3	3	1	3	3	3	3	3	3	1	3	3	3	3
Tdurum_contig12812_83	1B	205.07	3	3	3	3	3	3	3	3	1	1	3	3	3	3	3	3	3	1	3	3	3	3	3	3	3	3	3	3	3	3	3	3	1	3	3	3	3	3	3	3	3	3	1	3	3	3	3
BS00109910_51	1B	205.25	1	1	3	3	3	3	3	3	1	1	3	3	3	3	3	3	3	1	3	3	3	3	3	3	3	3	3	3	1	1	1	1	1	3	3	3	3	3	3	3	3	3	1	3	3	3	3
GENE.0158_358	1B	205.25	1	1	3	3	3	3	3	3	1	1	3	3	3	3	3	3	3	1	3	3	3	3	3	3	3	3	3	3	1	1	1	1	1	3	3	3	3	3	3	3	3	3	1	3	3	3	3
GENE.1276_68	1B	205.25	1	1	1	1	1	1	1	1	3	3	1	1	1	1	1	1	1	3	1	1	1	1	1	1	1	1	1	1	1	1	1	1	3	1	1	1	1	1	1	1	1	1	3	1	1	1	1
IAAV11	1B	205.25	1	1	3	3	3	3	3	3	1	1	3	3	3	3	3	3	3	1	3	3	3	3	3	3	3	3	3	3	1	1	1	1	1	3	3	3	3	3	3	3	3	3	1	3	3	3	3
BobWhite_c11036_842	1B	205.42	1	1	3	3	3	3	3	3	1	1	3	3	3	3	3	3	3	1	3	3	3	3	3	3	3	3	3	3	1	1	1	1	1	3	3	3	3	3	3	3	3	3	1	3	3	3	3
BobWhite_c872_587	1B	205.42	1	1	3	3	3	3	3	3	1	1	3	3	3	3	3	3	3	1	3	3	3	3	3	3	3	3	3	3	1	1	1	1	1	3	3	3	3	3	3	3	3	3	1	3	3	3	3
BS00035794_51	1B	205.42	1	1	3	3	3	3	3	3	1	1	3	3	3	3	3	3	3	1	3	3	3	3	3	3	3	3	3	3	1	1	1	1	1	3	3	3	3	3	3	3	3	3	1	3	3	3	3
BS00066135_51	1B	205.42	1	1	3	3	3	3	3	3	1	1	3	3	3	3	3	3	3	1	3	3	3	3	3	3	3	3	3	3	1	1	1	1	1	3	3	3	3	3	3	3	3	3	1	3	3	3	3
Ex_c103126_573	1B	205.42	3	3	1	1	1	1	1	1	3	3	1	1	1	1	1	1	1	3	1	1	1	1	1	1	1	1	1	1	3	3	3	3	3	1	1	1	1	1	1	1	1	1	3	1	1	1	1
Excalibur_c13308_302	1B	205.42	3	3	1	1	1	1	1	1	3	3	1	1	1	1	1	1	1	3	1	1	1	1	1	1	1	1	1	1	3	3	3	3	3	1	1	1	1	1	1	1	1	1	3	1	1	1	1
GENE.0163_519	1B	205.42	1	1	3	3	3	3	3	3	1	1	3	3	3	3	3	3	3	1	3	3	3	3	3	3	3	3	3	3	1	1	1	1	1	3	3	3	3	3	3	3	3	3	1	3	3	3	3
GENE.0181_607	1B	205.42	1	1	3	3	3	3	3	3	1	1	3	3	3	3	3	3	3	1	3	3	3	3	3	3	3	3	3	3	1	1	1	1	1	3	3	3	3	3	3	3	3	3	1	3	3	3	3
GENE.0217_123	1B	205.42	3	3	1	1	1	1	1	1	3	3	1	1	1	1	1	1	1	3	1	1	1	1	1	1	1	1	1	1	3	3	3	3	3	1	1	1	1	1	1	1	1	1	3	1	1	1	1
GENE.0366_124	1B	205.42	1	1	3	3	3	3	3	3	1	1	3	3	3	3	3	3	3	1	3	3	3	3	3	3	3	3	3	3	1	1	1	1	1	3	3	3	3	3	3	3	3	3	1	3	3	3	3
GENE.2766_500	1B	205.42	1	1	3	3	3	3	3	3	1	1	3	3	3	3	3	3	3	1	3	3	3	3	3	3	3	3	3	3	1	1	1	1	1	3	3	3	3	3	3	3	3	3	1	3	3	3	3
IAAV2777	1B	205.42	3	3	1	1	1	1	1	1	3	3	1	1	1	1	1	1	1	3	1	1	1	1	1	1	1	1	1	1	3	3	3	3	3	1	1	1	1	1	1	1	1	1	3	1	1	1	1
IAAV3509	1B	205.42	3	3	1	1	1	1	1	1	3	3	1	1	1	1	1	1	1	3	1	1	1	1	1	1	1	1	1	1	3	3	3	3	3	1	1	1	1	1	1	1	1	1	3	1	1	1	1
IAAV4362	1B	205.42	3	3	1	1	1	1	1	1	3	3	1	1	1	1	1	1	1	3	1	1	1	1	1	1	1	1	1	1	3	3	3	3	3	1	1	1	1	1	1	1	1	1	3	1	1	1	1
IAAV5236	1B	205.42	1	1	3	3	3	3	3	3	1	1	3	3	3	3	3	3	3	1	3	3	3	3	3	3	3	3	3	3	1	1	1	1	1	3	3	3	3	3	3	3	3	3	1	3	3	3	3
IAAV6948	1B	205.42	1	1	3	3	3	3	3	3	1	1	3	3	3	3	3	3	3	1	3	3	3	3	3	3	3	3	3	3	1	1	1	1	1	3	3	3	3	3	3	3	3	3	1	3	3	3	3
IAAV9097	1B	205.42	3	3	1	1	1	1	1	1	3	3	1	1	1	1	1	1	1	3	1	1	1	1	1	1	1	1	1	1	3	3	3	3	3	1	1	1	1	1	1	1	1	1	3	1	1	1	1
TA002525.0992	1B	205.42	3	3	1	1	1	1	1	1	3	3	1	1	1	1	1	1	1	3	1	1	1	1	1	1	1	1	1	1	3	3	3	3	3	1	1	1	1	1	1	1	1	1	3	1	1	1	1
BS00110530_51	1B	205.45	1	1	3	3	3	3	3	3	1	1	3	3	3	3	3	3	3	1	3	3	3	3	3	3	3	3	3	3	1	1	1	1	1	3	3	3	3	3	3	3	3	3	1	3	3	3	3
D_contig22896_682	1B	205.45	3	3	1	1	1	1	1	1	3	3	1	1	1	1	1	1	1	3	1	1	1	1	1	1	1	1	1	1	3	3	3	3	3	1	1	1	1	1	1	1	1	1	3	1	1	1	1
IACX778	1B	205.45	1	1	1	1	1	1	1	1	3	3	1	1	1	1	1	1	1	1	1	1	1	1	1	1	1	1	1	1	1	1	1	1	3	1	1	1	1	1	1	1	1	1	3	1	1	1	1
BobWhite_c16623_68	1B	206.01	1	1	3	3	3	3	3	3	1	1	3	3	3	3	3	3	3	1	3	3	3	3	3	3	3	3	3	3	1	1	1	1	1	3	3	3	3	3	3	3	3	3	1	3	3	3	3
BobWhite_c29659_339	1B	206.01	1	1	3	3	3	3	3	3	1	1	3	3	3	3	3	3	3	1	3	3	3	3	3	3	3	3	3	3	1	1	1	1	1	3	3	3	3	3	3	3	3	3	1	3	3	3	3
BobWhite_c45790_683	1B	206.01	3	3	3	3	3	3	3	3	1	1	3	3	3	3	3	3	3	1	3	3	3	3	3	3	3	3	3	3	3	3	3	3	1	3	3	3	3	3	3	3	3	3	1	3	3	3	3
BobWhite_c5757_260	1B	206.01	1	1	3	3	3	3	3	3	1	1	3	3	3	3	3	3	3	1	3	3	3	3	3	3	3	3	3	3	1	1	1	1	1	3	3	3	3	3	3	3	3	3	1	3	3	3	3
BobWhite_c7333_76	1B	206.01	1	1	1	1	1	1	1	3	1	1	1	1	1	1	1	3	1	1	1	3	3	1	3	1	3	1	1	1	1	1	1	1	1	1	1	1	1	1	1	1	1	1	1	1	1	1	1
BobWhite_rep_c49610_521	1B	206.01	1	1	3	3	3	3	3	3	1	1	3	3	3	3	3	3	3	1	3	3	3	3	3	3	3	3	3	3	1	1	1	1	1	3	3	3	3	3	3	3	3	3	1	3	3	3	3
BobWhite_rep_c50112_99	1B	206.01	1	1	3	3	3	3	3	3	1	1	3	3	3	3	3	3	3	1	3	3	3	3	3	3	3	3	3	3	1	1	1	1	1	3	3	3	3	3	3	3	3	3	1	3	3	3	3
BobWhite_rep_c51917_234	1B	206.01	1	1	3	3	3	3	3	3	1	1	3	3	3	3	3	3	3	1	3	3	3	3	3	3	3	3	3	3	1	1	1	1	1	3	3	3	3	3	3	3	3	3	1	3	3	3	3
BS00010352_51	1B	206.01	1	1	3	1	1	1	1	3	1	1	1	1	1	1	1	3	1	1	1	3	3	1	3	1	3	1	1	1	1	1	1	1	1	1	1	1	1	1	1	1	1	1	1	1	1	1	1
BS00011450_51	1B	206.01	1	1	3	1	1	1	1	3	1	1	1	1	1	1	1	3	1	1	1	3	3	1	3	1	3	1	1	1	1	1	1	1	1	1	1	1	1	1	1	1	1	1	1	1	1	1	1
BS00021748_51	1B	206.01	3	3	3	3	3	3	3	3	1	3	3	3	3	3	3	3	3	3	3	3	3	3	3	3	3	3	3	3	3	3	3	3	1	3	3	3	3	3	3	3	3	3	1	3	3	3	3
BS00062942_51	1B	206.01	3	3	3	3	3	3	3	1	3	3	3	3	3	3	3	1	3	3	3	1	1	3	1	3	1	3	3	3	3	3	3	3	3	3	3	3	3	3	3	3	3	3	3	3	3	3	3
BS00083237_51	1B	206.01	1	1	3	3	3	3	3	3	1	1	3	3	3	3	3	3	3	1	3	3	3	3	3	3	3	3	3	3	1	1	1	1	1	3	3	3	3	3	3	3	3	3	1	3	3	3	3
BS00083306_51	1B	206.01	1	1	1	1	1	1	1	1	3	3	1	1	1	1	1	1	1	3	1	1	1	1	1	1	1	1	1	1	1	1	1	1	3	1	1	1	1	1	1	1	1	1	3	1	1	1	1
BS00094467_51	1B	206.01	3	3	1	1	1	1	1	1	3	3	1	NA	1	1	1	1	1	3	1	1	1	1	1	1	1	1	1	1	3	3	3	3	3	1	1	1	1	1	1	1	1	1	3	1	1	1	1
BS00094469_51	1B	206.01	3	3	3	3	3	3	3	3	1	1	3	3	3	3	3	3	3	1	3	3	3	3	3	3	3	3	3	3	3	3	3	3	1	3	3	3	3	3	3	3	3	3	1	3	3	3	3
CAP12_c1632_462	1B	206.01	1	1	1	1	1	1	1	1	3	1	1	1	1	1	1	1	1	1	1	1	1	1	1	1	1	1	1	1	1	1	1	1	3	1	1	1	1	1	1	1	1	1	3	1	1	1	1
Ex_c24969_223	1B	206.01	3	3	3	3	3	3	3	1	3	3	3	3	3	3	3	1	3	3	3	1	1	3	1	3	1	3	3	3	3	3	3	3	3	3	3	3	3	3	3	3	3	3	3	3	3	3	3
Ex_c68416_859	1B	206.01	1	1	1	1	1	1	1	3	1	1	1	1	1	1	1	3	1	1	1	3	3	1	3	1	3	1	1	1	1	1	1	1	1	1	1	1	1	1	1	1	1	1	1	1	1	1	1
Excalibur_c10319_229	1B	206.01	1	1	3	1	1	1	1	3	1	1	1	1	1	1	1	3	1	1	1	3	3	1	3	1	3	1	1	1	1	1	1	1	1	1	1	1	1	1	1	1	1	1	1	1	1	1	1
Excalibur_c20228_135	1B	206.01	1	1	1	1	1	1	1	3	1	1	1	1	1	1	1	3	1	1	1	1	3	1	3	1	3	1	1	1	1	1	1	1	1	1	1	1	1	1	1	1	1	1	1	1	1	1	1
Excalibur_c23779_474	1B	206.01	3	3	3	3	3	3	3	1	3	3	3	3	3	3	3	1	3	3	3	1	1	3	1	3	1	3	3	3	3	3	3	3	3	3	3	3	3	3	3	3	3	3	3	3	3	3	3
Excalibur_c4082_370	1B	206.01	1	1	1	1	1	1	1	3	1	1	1	1	1	1	1	3	1	1	1	3	3	1	3	1	3	1	1	1	1	1	1	1	1	1	1	1	1	1	1	1	1	1	1	1	1	1	1
Excalibur_c5052_151	1B	206.01	1	1	1	1	1	1	1	3	1	1	1	1	1	1	1	3	1	1	1	3	3	1	3	1	3	1	1	1	1	1	1	1	1	1	1	1	1	1	1	1	1	1	1	1	1	1	1
Excalibur_c64533_980	1B	206.01	3	3	3	3	3	3	3	1	3	3	3	3	3	3	3	1	3	3	3	1	1	3	1	3	1	3	3	3	3	3	3	3	3	3	3	3	3	3	3	3	3	3	3	3	3	3	3
Excalibur_rep_c106001_513	1B	206.01	1	1	3	1	1	1	1	1	1	1	1	1	1	1	1	1	1	1	1	1	1	1	1	1	1	1	1	1	1	1	1	1	1	1	1	1	1	1	1	1	1	1	1	1	1	1	1
GENE.0074_370	1B	206.01	1	1	3	3	3	3	3	3	1	1	3	3	3	3	3	3	3	1	3	3	3	3	3	3	3	3	3	3	1	1	1	1	1	3	3	3	3	3	3	3	3	3	1	3	3	3	3
GENE.0173_168	1B	206.01	3	3	3	3	3	3	3	3	1	3	3	3	3	3	3	3	3	3	3	3	3	3	3	3	3	3	3	3	3	3	3	3	3	3	3	3	3	3	3	3	3	3	3	3	3	3	3
GENE.0173_290	1B	206.01	3	3	3	3	3	3	3	3	1	3	3	3	3	3	3	3	3	3	3	3	3	3	3	3	3	3	3	3	3	3	3	3	3	3	3	3	3	3	3	3	3	3	3	3	3	3	3
GENE.0173_309	1B	206.01	3	3	3	3	3	3	3	3	1	3	3	3	3	3	3	3	3	3	3	3	3	3	3	3	3	3	3	3	3	3	3	3	3	3	3	3	3	3	3	3	3	3	3	3	3	3	3
GENE.0227_217	1B	206.01	1	1	3	1	1	1	1	3	1	1	1	1	1	1	1	3	1	1	1	3	3	1	3	1	3	1	1	1	1	1	1	1	1	1	1	1	1	1	1	1	1	1	1	1	1	1	1
GENE.0254_148	1B	206.01	1	1	1	1	1	1	1	1	3	3	1	1	1	1	1	1	1	3	1	1	1	1	1	1	1	1	1	1	1	1	1	1	3	1	1	1	1	1	1	1	1	1	3	1	1	1	1
GENE.0285_336	1B	206.01	3	3	1	1	1	1	1	1	3	3	1	1	1	1	1	1	1	3	1	1	1	1	1	1	1	1	1	1	3	3	3	3	3	1	1	1	1	1	1	1	1	1	3	1	1	1	1
GENE.0400_330	1B	206.01	1	1	3	3	3	3	3	3	1	1	3	3	3	3	3	3	3	1	3	3	3	3	3	3	3	3	3	3	1	1	1	1	1	3	3	3	3	3	3	3	3	3	1	3	3	3	3
GENE.0411_350	1B	206.01	3	3	3	3	3	3	3	3	1	3	3	3	3	3	3	3	3	3	3	3	3	3	3	3	3	3	3	3	3	3	3	3	1	3	3	3	3	3	3	3	3	3	1	3	3	3	3
GENE.0459_114	1B	206.01	3	3	1	1	1	1	1	1	3	3	1	1	1	1	1	1	1	3	1	1	1	1	1	1	1	1	1	1	3	3	3	3	3	1	1	1	1	1	1	1	1	1	3	1	1	1	1
GENE.0459_370	1B	206.01	3	3	1	1	1	1	1	1	3	3	1	1	1	1	1	1	1	3	1	1	1	1	1	1	1	1	1	1	3	3	3	3	3	1	1	1	1	1	1	1	1	1	3	1	1	1	1
GENE.0565_201	1B	206.01	1	1	3	3	3	3	3	3	1	1	3	3	3	3	3	3	3	1	3	3	3	3	3	3	3	3	3	3	1	1	1	1	1	3	3	3	3	3	3	3	3	3	1	3	3	3	3
GENE.1529_694	1B	206.01	1	1	3	3	3	3	3	3	1	1	3	3	3	3	3	3	3	1	3	3	3	3	3	3	3	3	3	3	1	1	1	1	1	3	3	3	3	3	3	3	3	3	1	3	3	3	3
GENE.3956_91	1B	206.01	1	1	3	3	3	3	3	3	1	1	3	3	3	3	3	3	3	1	3	3	3	3	3	3	3	3	3	3	1	1	1	1	1	3	3	3	3	3	3	3	3	3	1	3	3	3	3
IAAV1364	1B	206.01	3	1	3	3	1	1	3	3	1	1	3	1	1	3	3	3	3	1	3	3	3	3	3	3	3	3	3	1	3	1	1	3	1	3	3	1	1	3	3	1	3	3	1	3	1	3	3
IAAV4055	1B	206.01	1	1	3	3	3	3	3	3	1	1	3	3	3	3	3	3	3	1	3	3	3	3	3	3	3	3	3	3	1	1	1	1	1	3	3	3	3	3	3	3	3	3	1	3	3	3	3
IAAV4861	1B	206.01	3	3	1	1	1	1	1	1	3	3	1	1	1	1	1	1	1	3	1	1	1	1	1	1	1	1	1	1	3	3	3	3	3	1	1	1	1	1	1	1	1	1	3	1	1	1	1
IAAV5269	1B	206.01	1	1	1	1	1	1	1	3	1	1	1	NA	1	1	1	3	1	1	1	3	3	1	3	1	3	1	1	1	1	1	1	1	1	1	1	1	1	1	1	1	1	1	1	1	1	1	1
IAAV5364	1B	206.01	1	1	3	3	3	3	3	3	1	1	3	3	3	3	3	3	3	1	3	3	3	3	3	3	3	3	3	3	1	1	1	1	1	3	3	3	3	3	3	3	3	3	1	3	3	3	3
IAAV587	1B	206.01	1	1	3	3	3	3	3	3	1	NA	3	3	3	3	3	3	3	1	3	3	3	3	3	3	3	3	3	3	1	1	1	1	1	3	3	3	3	3	3	3	3	3	1	3	3	3	3
IAAV6407	1B	206.01	1	1	1	1	1	1	1	1	3	3	1	1	1	1	1	1	1	3	1	1	1	1	1	1	1	1	1	1	1	1	1	1	3	1	1	1	1	1	1	1	1	1	3	1	1	1	1
IAAV6888	1B	206.01	3	3	3	3	3	3	3	3	1	1	3	3	3	3	3	3	3	3	3	3	3	3	3	3	3	3	3	3	3	3	3	3	1	3	3	3	3	3	3	3	3	3	1	3	3	3	3
IAAV7260	1B	206.01	1	1	1	1	1	1	1	3	1	1	1	1	1	1	1	3	1	1	1	3	3	1	3	1	3	1	1	1	1	1	1	1	1	1	1	1	1	1	1	1	1	1	1	1	1	1	1
IAAV7634	1B	206.01	1	1	3	3	3	3	3	3	1	1	3	3	3	3	3	3	3	1	3	3	3	3	3	3	3	3	3	3	1	1	1	1	1	3	3	3	3	3	3	3	3	3	1	3	3	3	3
IAAV8661	1B	206.01	3	3	3	3	3	3	3	1	3	3	3	3	3	3	3	1	3	3	3	1	1	3	1	3	1	3	3	3	3	3	3	3	3	3	3	3	3	3	3	3	3	3	3	3	3	3	3
IAAV9195	1B	206.01	3	3	3	3	3	3	3	3	1	1	3	3	3	3	3	3	3	1	3	3	3	3	3	3	3	3	3	3	3	3	3	3	1	3	3	3	3	3	3	3	3	3	1	3	3	3	3
IACX1339	1B	206.01	1	1	1	1	1	1	1	1	1	1	1	1	1	1	1	1	1	1	1	3	1	1	1	1	1	1	1	1	1	1	1	1	1	1	1	1	1	1	1	1	1	1	1	1	1	1	1
IACX6356	1B	206.01	1	1	3	3	3	3	3	3	1	1	3	3	3	3	3	3	3	1	3	3	3	3	3	3	3	3	3	3	1	1	1	1	1	3	3	3	3	3	3	3	3	3	1	3	3	3	3
JD_c1532_462	1B	206.01	1	1	3	3	3	3	3	3	1	1	3	3	3	3	3	3	3	1	3	3	3	3	3	3	3	3	3	3	1	1	1	1	1	3	3	3	3	3	3	3	3	3	1	3	3	3	3
JD_c3173_947	1B	206.01	1	1	1	1	1	1	1	1	3	3	1	1	1	1	1	1	1	3	1	1	1	1	1	1	1	1	1	1	1	1	1	1	3	1	1	1	1	1	1	1	1	1	3	1	1	1	1
JD_c4432_1913	1B	206.01	3	3	3	3	3	3	3	3	1	1	3	3	3	3	3	3	3	1	3	3	3	3	3	3	3	3	3	3	3	3	3	3	1	3	3	3	3	3	3	3	3	3	1	3	3	3	3
JD_c6297_810	1B	206.01	1	1	3	3	3	3	3	3	1	1	3	3	3	3	3	3	3	1	3	3	3	3	3	3	3	3	3	3	1	1	1	1	1	3	3	3	3	3	3	3	3	3	1	3	3	3	3
Ku_c11813_215	1B	206.01	3	3	3	3	3	3	3	3	3	3	3	3	3	3	3	3	3	3	3	3	3	3	3	3	3	3	3	3	3	3	3	3	1	3	3	3	3	3	3	3	3	3	1	3	3	3	3
Ku_c62848_956	1B	206.01	3	3	3	3	3	3	3	1	3	3	3	3	3	3	3	1	3	3	3	1	1	3	1	3	1	3	3	3	3	3	3	3	3	3	3	3	3	3	3	3	3	3	3	3	3	3	3
Kukri_c11580_451	1B	206.01	3	3	3	3	3	3	3	1	3	3	3	NA	3	3	3	1	3	3	3	3	1	3	1	3	1	3	3	3	3	3	3	3	3	3	3	3	3	3	3	3	3	3	3	3	3	3	3
Kukri_c11580_818	1B	206.01	1	1	1	1	1	1	1	3	1	1	1	1	1	1	1	3	1	1	1	1	3	1	3	1	3	1	1	1	1	1	1	1	1	1	1	1	1	1	1	1	1	1	1	1	1	1	1
Kukri_c13156_129	1B	206.01	3	3	3	3	3	3	3	1	3	3	3	3	3	3	3	1	3	3	3	3	1	3	1	3	1	3	3	3	3	3	3	3	3	3	3	3	3	3	3	3	3	3	3	3	3	3	3
Kukri_c2535_98	1B	206.01	1	1	1	1	1	1	1	3	1	1	1	1	1	1	1	3	1	1	1	3	3	1	3	1	3	1	1	1	1	1	1	1	1	1	1	1	1	1	1	1	1	1	1	1	1	1	1
Kukri_c27495_816	1B	206.01	1	3	1	1	3	3	1	1	3	3	1	3	3	1	1	1	1	3	1	1	1	1	1	1	1	1	1	3	1	3	3	1	3	1	1	3	3	1	1	3	1	1	3	1	3	1	1
Kukri_c62848_106	1B	206.01	3	3	3	3	3	3	3	1	3	3	3	3	3	3	3	1	3	3	3	1	1	3	1	3	1	3	3	3	3	3	3	3	3	3	3	3	3	3	3	3	3	3	3	3	3	3	3
Kukri_c84940_106	1B	206.01	1	1	1	1	1	1	1	3	1	1	1	1	1	1	1	3	1	1	1	3	3	1	3	1	3	1	1	1	1	1	1	1	1	1	1	1	1	1	1	1	1	1	1	1	1	1	1
Ra_c1195_200	1B	206.01	3	3	3	3	3	3	3	1	3	3	3	3	3	3	3	1	3	3	3	1	1	3	1	3	1	3	3	3	3	3	3	3	3	3	3	3	3	3	3	3	3	3	3	3	3	3	3
Ra_c16069_1820	1B	206.01	1	1	1	1	1	1	1	3	1	1	1	1	1	1	1	3	1	1	1	3	3	1	3	1	3	1	1	1	1	1	1	1	1	1	1	1	1	1	1	1	1	1	1	1	1	1	1
Ra_c70039_1705	1B	206.01	3	3	3	3	3	3	3	1	3	3	3	3	3	3	3	1	3	3	3	1	1	3	1	3	1	3	3	3	3	3	3	3	3	3	3	3	3	3	3	3	3	3	3	3	3	3	3
Ra_c7855_49	1B	206.01	3	3	3	3	3	3	3	1	3	3	3	3	3	3	3	1	3	3	3	1	1	3	1	3	1	3	3	3	3	3	3	3	3	3	3	3	3	3	3	3	3	3	3	3	3	3	3
RAC875_c11749_97	1B	206.01	1	1	1	1	1	1	1	3	1	1	1	1	1	1	1	3	1	1	1	3	3	1	3	1	3	1	1	1	1	1	1	1	1	1	1	1	1	1	1	1	1	1	1	1	1	1	1
RAC875_c16677_56	1B	206.01	3	3	3	3	3	3	3	1	3	3	3	3	3	3	3	1	3	3	3	1	1	3	1	3	1	3	3	3	3	3	3	3	3	3	3	3	3	3	3	3	3	3	3	3	3	3	3
RAC875_c18282_1390	1B	206.01	1	1	1	1	1	1	1	3	1	1	1	1	1	1	1	3	1	1	1	3	3	1	3	1	3	1	1	1	1	1	1	1	1	1	1	1	1	1	1	1	1	1	1	1	1	1	1
RAC875_c20420_87	1B	206.01	1	1	1	1	1	1	1	3	1	1	1	1	1	1	1	3	1	1	1	3	3	1	3	1	3	1	1	1	1	1	1	1	1	1	1	1	1	1	1	1	1	1	1	1	1	1	1
RAC875_c20775_540	1B	206.01	3	3	3	3	3	3	3	1	1	3	3	3	3	3	3	1	3	3	3	3	1	3	1	3	1	3	3	3	3	3	3	3	3	3	3	3	3	3	3	3	3	3	3	3	3	3	3
RAC875_c25708_503	1B	206.01	1	1	1	1	1	1	1	3	1	1	1	1	1	1	1	3	1	1	1	3	3	1	3	1	3	1	1	1	1	1	1	1	1	1	1	1	1	1	1	1	1	1	1	1	1	1	1
RAC875_c2972_225	1B	206.01	3	3	3	3	3	3	3	1	3	3	3	3	3	3	3	1	3	3	3	1	1	3	1	3	1	3	3	3	3	3	3	3	3	3	3	3	3	3	3	3	3	3	3	3	3	3	3
RAC875_c3457_65	1B	206.01	3	3	1	3	3	3	3	3	3	3	3	3	3	3	3	3	3	3	3	3	3	3	3	3	3	3	3	3	3	3	3	3	3	3	3	3	3	3	3	3	3	3	3	3	3	3	3
RAC875_c41675_396	1B	206.01	1	1	1	1	1	1	1	1	3	3	1	1	1	1	1	1	1	3	1	3	1	1	1	1	1	1	1	1	1	1	1	1	3	1	1	1	1	1	1	1	1	1	3	1	1	1	1
RAC875_c50365_521	1B	206.01	1	1	1	1	1	1	1	3	1	1	1	1	1	1	1	3	1	1	1	1	3	1	3	1	3	1	1	1	1	1	1	1	1	1	1	1	1	1	1	1	1	1	1	1	1	1	1
RAC875_c63421_83	1B	206.01	1	1	1	1	1	1	1	3	1	1	1	1	1	1	1	3	1	1	1	3	3	1	3	1	3	1	1	1	1	1	1	1	1	1	1	1	1	1	1	1	1	1	1	1	1	1	1
RAC875_c79971_61	1B	206.01	1	1	1	1	1	1	1	3	1	1	1	1	1	1	1	3	1	1	1	1	3	1	3	1	3	1	1	1	1	1	1	1	1	1	1	1	1	1	1	1	1	1	1	1	1	1	1
RAC875_rep_c117462_124	1B	206.01	3	3	3	3	3	3	3	1	3	3	3	3	3	3	3	1	3	3	3	1	1	3	1	3	1	3	3	3	3	3	3	3	3	3	3	3	3	3	3	3	3	3	3	3	3	3	3
RAC875_rep_c75762_175	1B	206.01	1	1	1	1	1	1	1	3	1	1	1	1	1	1	1	3	1	1	1	3	3	1	3	1	3	1	1	1	1	1	1	1	1	1	1	1	1	1	1	1	1	1	1	1	1	1	1
RFL_Contig1354_663	1B	206.01	3	3	3	3	3	3	3	1	3	3	3	3	3	3	3	1	3	3	3	1	1	3	1	3	1	3	3	3	3	3	3	3	3	3	3	3	3	3	3	3	3	3	3	3	3	3	3
RFL_Contig2670_718	1B	206.01	3	3	3	3	3	3	3	3	1	1	3	3	3	3	3	3	3	1	3	3	3	3	3	3	3	3	3	3	3	3	3	3	1	3	3	3	3	3	3	3	3	3	1	3	3	3	3
TA002664.0848	1B	206.01	1	1	3	3	3	3	3	3	1	1	3	3	3	3	3	3	3	1	3	3	3	3	3	3	3	3	3	3	1	1	1	1	1	3	3	3	3	3	3	3	3	3	1	3	3	3	3
TA004184.0525	1B	206.01	3	3	3	3	3	3	3	1	3	3	3	3	3	3	3	1	3	3	3	3	1	3	1	3	1	3	3	3	3	3	3	3	3	3	3	3	3	3	3	3	3	3	3	3	3	3	3
Tdurum_contig13391_680	1B	206.01	1	1	1	1	1	1	1	3	1	1	1	NA	1	1	1	3	1	1	1	1	3	1	3	1	3	1	1	1	1	1	1	1	1	1	1	1	1	1	1	1	1	1	1	1	1	1	1
Tdurum_contig14650_689	1B	206.01	3	3	3	3	3	3	3	1	3	3	3	3	3	3	3	1	3	3	3	1	1	3	1	3	1	3	3	3	3	3	3	3	3	3	3	3	3	3	3	3	3	3	3	3	3	3	3
Tdurum_contig31201_201	1B	206.01	3	3	3	3	3	3	3	1	3	3	3	3	3	3	3	1	3	3	3	1	1	3	1	3	1	3	3	3	3	3	3	3	3	3	3	3	3	3	3	3	3	3	3	3	3	3	3
Tdurum_contig31201_380	1B	206.01	1	1	1	1	1	1	1	3	1	1	1	1	1	1	1	3	1	1	1	3	3	1	3	1	3	1	1	1	1	1	1	1	1	1	1	1	1	1	1	1	1	1	1	1	1	1	1
Tdurum_contig31624_230	1B	206.01	1	1	1	1	1	1	1	3	3	1	1	1	1	1	1	3	1	1	1	1	3	1	3	1	3	1	1	1	1	1	1	1	1	1	1	1	1	1	1	1	1	1	1	1	1	1	1
Tdurum_contig42289_936	1B	206.01	3	3	3	3	3	3	3	1	3	3	3	3	3	3	3	1	3	3	3	3	1	3	1	3	1	3	3	3	3	3	3	3	3	3	3	3	3	3	3	3	3	3	3	3	3	3	3
Tdurum_contig60547_330	1B	206.01	3	3	3	3	3	3	3	3	1	3	3	3	3	3	3	3	3	3	3	3	3	3	3	3	3	3	3	3	3	3	3	3	3	3	3	3	3	3	3	3	3	3	3	3	3	3	3
Tdurum_contig60809_255	1B	206.01	1	1	1	1	1	1	1	3	1	1	1	1	1	1	1	3	1	1	1	1	3	1	3	1	3	1	1	1	1	1	1	1	1	1	1	1	1	1	1	1	1	1	1	1	1	1	1
Tdurum_contig60809_268	1B	206.01	3	3	3	3	3	3	3	1	3	3	3	3	3	3	3	1	3	3	3	3	1	3	1	3	1	3	3	3	3	3	3	3	3	3	3	3	3	3	3	3	3	3	3	3	3	3	3
Tdurum_contig63991_186	1B	206.01	3	3	3	3	3	3	3	1	3	3	3	3	3	3	3	1	3	3	3	3	1	3	1	3	1	3	3	3	3	3	3	3	3	3	3	3	3	3	3	3	3	3	3	3	3	3	3
Tdurum_contig63991_280	1B	206.01	3	3	3	3	3	3	3	1	3	3	3	3	3	3	3	1	3	3	3	3	1	3	1	3	1	3	3	3	3	3	3	3	3	3	3	3	3	3	3	3	3	3	3	3	3	3	3
Tdurum_contig63991_404	1B	206.01	1	1	1	1	1	1	1	3	1	1	1	1	1	1	1	3	1	1	1	1	3	1	3	1	3	1	1	1	1	1	1	1	1	1	1	1	1	1	1	1	1	1	1	1	1	1	1
tplb0024i16_1177	1B	206.01	3	3	3	3	3	3	3	1	3	3	3	3	3	3	3	1	3	3	3	3	1	3	1	3	1	3	3	3	3	3	3	3	3	3	3	3	3	3	3	3	3	3	3	3	3	3	3
tplb0029b01_1022	1B	206.01	3	3	1	3	3	3	3	1	3	3	3	3	3	3	3	1	3	3	3	1	1	3	1	3	1	3	3	3	3	3	3	3	3	3	3	3	3	3	3	3	3	3	3	3	3	3	3
tplb0029b01_123	1B	206.01	3	3	1	3	3	3	3	1	3	3	3	3	3	3	3	1	3	3	3	1	1	3	1	3	1	3	3	3	3	3	3	3	3	3	3	3	3	3	3	3	3	3	3	3	3	3	3
wsnp_Ex_c11177_18096010	1B	206.01	1	1	1	1	1	1	1	3	1	1	1	NA	1	1	1	3	1	1	1	3	3	1	3	1	3	1	1	1	1	1	1	1	1	1	1	1	1	1	1	1	1	1	1	1	1	1	1
wsnp_Ex_rep_c69266_68192766	1B	206.01	1	1	1	1	1	1	1	3	1	1	1	1	1	1	1	3	1	1	1	3	3	1	3	1	3	1	1	1	1	1	1	1	1	1	1	1	1	1	1	1	1	1	1	1	1	1	1
wsnp_Ku_c62848_63784645	1B	206.01	3	3	3	3	3	3	3	1	3	3	3	3	3	3	3	1	3	3	3	1	1	3	1	3	1	3	3	3	3	3	3	3	3	3	3	3	3	3	3	3	3	3	3	3	3	3	3
wsnp_Ku_rep_c71900_71624324	1B	206.01	3	1	3	3	1	1	3	3	1	1	3	1	1	3	3	1	3	1	3	1	1	3	3	3	3	3	3	1	3	1	1	3	1	3	3	1	1	3	3	1	3	3	1	3	1	3	3
wsnp_RFL_Contig2794_2564017	1B	206.01	3	3	3	3	3	3	3	1	3	3	3	3	3	3	3	1	3	3	3	1	1	3	1	3	1	3	3	3	3	3	3	3	3	3	3	3	3	3	3	3	3	3	3	3	3	3	3
RAC875_rep_c70022_1648	1B	206.64	3	1	3	3	1	1	3	3	1	1	3	1	1	3	3	1	3	1	3	1	1	3	3	3	3	3	3	1	3	1	1	3	1	3	3	1	1	3	3	1	3	3	1	3	1	3	3
CAP7_rep_c12580_266	1B	206.69	3	3	3	3	3	3	3	1	3	3	3	3	3	3	3	1	3	3	3	1	1	3	1	3	1	3	3	3	3	3	3	3	3	3	3	3	3	3	3	3	3	3	3	3	3	3	3
Excalibur_c15885_1145	1B	206.69	3	3	3	3	3	3	3	1	3	3	3	3	3	3	3	1	3	3	3	1	1	3	1	3	1	3	3	3	3	3	3	3	3	3	3	3	3	3	3	3	3	3	3	3	3	3	3
JD_c2834_381	1B	206.69	1	1	1	1	1	1	1	3	1	1	1	1	1	1	1	3	1	1	1	1	3	1	3	1	3	1	1	1	1	1	1	1	1	1	1	1	1	1	1	1	1	1	1	1	1	1	1
Kukri_c10308_342	1B	206.69	3	3	3	3	3	3	3	1	3	3	3	3	3	3	3	1	3	3	3	3	1	3	1	3	1	3	3	3	3	3	3	3	3	3	3	3	3	3	3	3	3	3	3	3	3	3	3
Kukri_c62848_1581	1B	206.69	1	1	1	1	1	1	1	3	1	1	1	1	1	1	1	3	1	1	1	3	3	1	3	1	3	1	1	1	1	1	1	1	1	1	1	1	1	1	1	1	1	1	1	1	1	1	1
Kukri_c62848_1632	1B	206.69	1	1	1	1	1	1	1	3	1	1	1	1	1	1	1	3	1	1	1	3	3	1	3	1	3	1	1	1	1	1	1	1	1	1	1	1	1	1	1	1	1	1	1	1	1	1	1
Kukri_c7428_604	1B	206.69	3	3	3	3	3	3	3	1	3	3	3	3	3	3	3	1	3	3	3	1	1	3	1	3	1	3	3	3	3	3	3	3	3	3	3	3	3	3	3	3	3	3	3	3	3	3	3
Kukri_rep_c111213_148	1B	206.69	1	1	1	1	1	1	1	3	1	1	1	1	1	1	1	3	1	1	1	1	3	1	3	1	3	1	1	1	1	1	1	1	1	1	1	1	1	1	1	1	1	1	1	1	1	1	1
Kukri_rep_c68583_931	1B	206.69	3	3	3	3	3	3	3	1	3	3	3	3	3	3	3	1	3	3	3	1	1	3	1	3	1	3	3	3	3	3	3	3	3	3	3	3	3	3	3	3	3	3	3	3	3	3	3
RAC875_c10226_1478	1B	206.69	3	3	3	3	3	3	3	1	3	3	3	3	3	3	3	1	3	3	3	3	1	3	1	3	1	3	3	3	3	3	3	3	3	3	3	3	3	3	3	3	3	3	3	3	3	3	3
RFL_Contig2784_641	1B	206.69	1	1	1	1	1	1	1	3	1	1	1	1	1	1	1	3	1	1	1	3	3	1	3	1	3	1	1	1	1	1	1	1	1	1	1	1	1	1	1	1	1	1	1	1	1	1	1
Tdurum_contig42289_1857	1B	206.69	1	1	1	1	1	1	1	3	1	1	1	1	1	1	1	3	1	1	1	1	3	1	3	1	3	1	1	1	1	1	1	1	1	1	1	1	1	1	1	1	1	1	1	1	1	1	1
tplb0024i16_800	1B	206.69	1	1	1	1	1	1	1	3	1	1	1	1	1	1	1	3	1	1	1	1	3	1	3	1	3	1	1	1	1	1	1	1	1	1	1	1	1	1	1	1	1	1	1	1	1	1	1
wsnp_BE443531B_Ta_1_1	1B	206.69	3	3	3	3	1	1	3	3	3	3	3	3	1	3	3	3	3	3	3	3	3	3	3	3	3	3	3	3	3	3	3	3	3	3	3	3	1	3	3	1	3	3	3	3	1	3	3
wsnp_CAP12_c399_219300	1B	206.69	1	1	1	1	1	1	1	3	1	1	1	1	1	1	1	3	1	1	1	1	3	1	3	1	3	1	1	1	1	1	1	1	1	1	1	1	1	1	1	1	1	1	1	1	1	1	1
BobWhite_c15603_69	1B	207.14	3	3	1	3	3	3	3	3	3	3	3	3	3	3	3	3	3	3	3	3	3	3	3	3	3	3	3	3	3	3	3	3	3	3	3	3	3	3	3	3	3	3	3	3	3	3	3
IAAV7757	1B	207.14	3	3	1	3	3	3	3	3	3	3	3	3	3	3	3	3	3	3	3	3	3	3	3	3	3	3	3	3	3	3	3	3	3	3	3	3	3	3	3	3	3	3	3	3	3	3	3
Kukri_c13976_96	1B	207.14	3	3	3	3	3	3	3	3	3	3	3	3	3	3	3	3	3	3	3	3	3	3	3	3	3	3	3	3	3	3	3	3	3	3	3	3	3	3	3	3	3	3	3	3	3	3	3
Kukri_c31554_437	1B	207.14	3	3	1	3	3	3	3	3	3	3	3	3	3	3	3	3	3	3	3	3	3	3	3	3	3	3	3	3	3	3	3	3	3	3	3	3	3	3	3	3	3	3	3	3	3	3	3
Kukri_rep_c101799_95	1B	207.14	3	3	3	3	1	1	3	3	3	3	3	3	1	3	3	3	3	3	3	3	3	3	3	3	3	3	3	3	3	3	3	3	3	3	3	1	1	3	3	1	3	3	3	3	1	3	3
RAC875_c7236_3265	1B	207.14	1	1	3	1	1	1	1	1	1	1	1	1	1	1	1	1	1	1	1	1	1	1	1	1	1	1	1	1	1	1	1	1	1	1	1	1	1	1	1	1	1	1	1	1	1	1	1
TA013374.0567	1B	207.14	3	3	3	3	3	3	3	3	3	3	3	3	3	3	3	3	3	3	3	3	3	3	3	3	3	3	3	3	3	3	3	3	3	3	3	3	3	3	3	3	3	3	3	3	3	3	3
Tdurum_contig29769_202	1B	207.14	3	3	1	3	3	3	3	3	3	3	3	3	3	3	3	3	3	3	3	3	3	3	3	3	3	3	3	3	3	3	3	3	3	3	3	3	3	3	3	3	3	3	3	3	3	3	3
wsnp_Ra_c4296_7819139	1B	207.14	3	1	3	3	1	1	3	3	1	1	3	1	1	3	3	3	3	1	3	1	3	3	3	3	3	3	3	1	3	1	1	3	1	3	3	1	1	3	3	1	3	3	1	3	1	3	3
BS00050126_51	1B	208.38	3	3	3	3	3	3	3	3	3	3	3	3	3	3	3	3	3	3	3	3	3	3	3	3	3	3	3	1	3	3	3	3	3	3	3	3	3	3	3	3	3	3	3	3	3	3	3
Excalibur_c6497_535	1B	208.38	1	3	1	1	3	3	1	1	1	3	1	3	3	1	1	1	1	3	1	1	1	1	1	1	1	1	1	3	1	3	3	1	1	1	1	3	3	1	1	3	1	1	1	1	3	1	1
IAAV3232	1B	208.38	3	3	3	3	3	3	3	3	3	3	3	3	3	1	3	3	3	3	1	1	3	3	3	3	3	3	3	3	3	3	3	1	3	3	3	3	3	3	1	3	1	3	3	1	3	3	3
RAC875_c864_88	1B	208.38	1	3	3	1	3	3	1	3	3	3	1	3	3	1	1	3	1	3	1	3	3	1	3	1	3	1	1	3	1	3	3	1	3	1	1	3	3	1	1	3	1	1	3	1	3	1	1
BobWhite_c13450_2100	1B	208.49	3	3	1	3	3	3	3	3	3	3	3	3	3	3	3	3	3	3	3	3	3	3	3	3	3	3	3	3	3	3	3	3	3	3	3	3	3	3	3	3	3	3	3	3	3	3	3
BobWhite_c1456_615	1B	208.49	1	1	3	1	1	1	1	1	1	1	1	1	1	1	1	1	1	1	1	1	1	1	1	1	1	1	1	1	1	1	1	1	1	1	1	1	1	1	1	1	1	1	1	1	1	1	1
BobWhite_rep_c62985_546	1B	208.49	1	1	1	1	1	1	1	1	1	1	1	1	1	1	1	1	1	1	1	3	1	1	1	1	1	1	1	3	1	1	1	1	1	1	1	1	1	1	1	1	1	1	1	1	1	1	1
BS00009731_51	1B	208.49	1	1	1	1	1	1	1	3	1	1	1	1	1	1	1	3	1	1	1	1	3	1	3	1	3	1	1	1	1	1	1	1	1	1	1	1	1	1	1	1	1	1	1	1	1	1	1
BS00010875_51	1B	208.49	3	3	3	3	3	3	3	3	3	3	3	3	3	3	3	3	3	3	3	3	3	3	3	3	3	3	3	3	3	3	3	3	3	3	3	3	3	3	3	3	3	3	3	3	3	3	3
BS00011465_51	1B	208.49	1	1	1	1	1	1	1	1	1	1	1	1	1	1	1	1	1	1	1	1	1	1	1	1	1	1	1	1	1	1	1	1	1	1	1	1	1	1	1	1	1	1	1	1	1	1	1
BS00022104_51	1B	208.49	3	3	1	3	3	3	3	3	3	3	3	3	3	3	3	3	3	3	3	3	3	3	3	3	3	3	3	3	3	3	3	3	3	3	3	3	3	3	3	3	3	3	3	3	3	3	3
BS00022490_51	1B	208.49	1	1	1	1	1	1	1	1	1	1	1	1	1	1	1	1	1	1	1	1	1	1	1	1	1	1	1	1	1	1	1	1	1	1	1	1	1	1	1	1	1	1	1	1	1	1	1
BS00023006_51	1B	208.49	1	1	1	1	1	1	1	1	1	1	1	1	1	1	1	1	1	1	1	1	1	1	1	1	1	1	1	1	1	1	1	1	1	1	1	1	1	1	1	1	1	1	1	1	1	1	1
BS00023302_51	1B	208.49	3	3	3	3	3	3	3	3	3	3	3	3	3	3	3	3	3	3	3	3	3	3	3	3	3	3	3	1	3	3	3	3	3	3	3	3	3	3	3	3	3	3	3	3	3	3	3
BS00041010_51	1B	208.49	3	3	3	3	3	3	3	1	3	3	3	3	3	3	3	1	3	3	3	3	1	3	1	3	1	3	3	3	3	3	3	3	3	3	3	3	3	3	3	3	3	3	3	3	3	3	3
BS00043071_51	1B	208.49	1	1	1	1	1	1	1	1	1	1	1	1	1	1	1	1	1	1	1	1	1	1	1	1	1	1	1	1	1	1	1	1	1	1	1	1	1	1	1	1	1	1	1	1	1	1	1
BS00047700_51	1B	208.49	3	3	3	3	3	3	3	3	3	3	3	3	3	3	3	3	3	3	3	3	3	3	3	3	3	3	3	1	3	3	3	3	3	3	3	3	3	3	3	3	3	3	3	3	3	3	3
BS00050457_51	1B	208.49	1	1	1	1	1	1	1	1	1	1	1	1	1	1	1	1	1	1	1	1	1	1	1	1	1	1	1	3	1	1	1	1	1	1	1	1	1	1	1	1	1	1	1	1	1	1	1
BS00063866_51	1B	208.49	1	1	1	1	1	1	1	1	1	1	1	1	1	1	1	1	1	1	1	1	1	1	1	1	1	1	1	3	1	1	1	1	1	1	1	1	1	1	1	1	1	1	1	1	1	1	1
BS00063885_51	1B	208.49	3	3	1	3	3	3	3	3	3	3	3	3	3	3	3	3	3	3	3	3	3	3	3	3	3	3	3	3	3	3	3	3	3	3	3	3	3	3	3	3	3	3	3	3	3	3	3
BS00064438_51	1B	208.49	1	1	1	1	1	1	1	1	1	1	1	1	1	1	1	1	1	NA	1	1	1	1	1	1	1	1	1	1	1	1	1	1	1	1	1	1	1	1	1	1	1	1	1	1	1	1	1
BS00065139_51	1B	208.49	1	1	1	1	1	1	1	1	1	1	1	1	1	1	1	1	1	1	1	1	1	1	1	1	1	1	1	3	1	1	1	1	1	1	1	1	1	1	1	1	1	1	1	1	1	1	1
BS00066040_51	1B	208.49	3	3	3	3	3	3	3	3	3	3	3	3	3	3	3	3	3	3	3	3	3	3	3	3	3	3	3	1	3	3	3	3	3	3	3	3	3	3	3	3	3	3	3	3	3	3	3
BS00066165_51	1B	208.49	3	3	3	3	3	3	3	3	1	1	3	3	3	3	3	3	3	1	3	3	3	3	3	3	3	3	3	1	3	3	3	3	1	3	3	3	3	3	3	3	3	3	1	3	3	3	3
BS00067743_51	1B	208.49	3	3	3	3	3	3	3	3	3	3	3	3	3	3	3	3	3	3	3	3	3	3	3	3	3	3	3	3	3	3	3	3	3	3	3	3	3	3	3	3	3	3	3	3	3	3	3
BS00073373_51	1B	208.49	3	3	3	3	3	3	3	3	3	3	3	3	3	3	3	3	3	3	3	3	3	3	3	3	3	3	3	1	3	3	3	3	3	3	3	3	3	3	3	3	3	3	3	3	3	3	3
BS00077353_51	1B	208.49	3	3	3	3	3	3	3	3	3	3	3	3	3	3	3	3	3	3	3	3	3	3	3	3	3	3	3	1	3	3	3	3	3	3	3	3	3	3	3	3	3	3	3	3	3	3	3
BS00088264_51	1B	208.49	1	1	1	1	1	1	1	1	1	1	1	1	1	1	1	1	1	1	1	1	1	1	1	1	1	1	1	3	1	1	1	1	1	1	1	1	1	1	1	1	1	1	1	1	1	1	1
BS00097433_51	1B	208.49	1	1	1	1	1	1	1	1	1	1	1	1	1	1	1	1	1	1	1	1	1	1	1	1	1	1	1	1	1	1	1	1	1	1	1	1	1	1	1	1	1	1	1	1	1	1	1
BS00098730_51	1B	208.49	1	1	3	3	3	3	3	3	1	1	3	3	3	3	3	3	3	1	3	3	3	3	3	3	3	3	3	3	1	1	1	1	1	3	3	3	3	3	3	3	3	3	1	3	3	3	3
BS00106581_51	1B	208.49	3	3	3	3	3	3	3	3	3	3	3	3	3	3	3	3	3	3	3	3	3	3	3	3	3	3	3	3	3	3	3	3	3	3	3	3	3	3	3	3	3	3	3	3	3	3	3
CAP12_c3646_110	1B	208.49	1	1	1	1	1	1	1	1	1	1	1	1	1	1	1	1	1	1	1	1	1	1	1	1	1	1	1	1	1	1	1	1	1	1	1	1	1	1	1	1	1	1	1	1	1	1	1
CAP7_c1241_128	1B	208.49	3	3	1	3	3	3	3	3	3	3	3	3	3	3	3	3	3	3	3	3	3	3	3	3	3	3	3	3	3	3	3	3	3	3	3	3	3	3	3	3	3	3	3	3	3	3	3
CAP8_c4506_82	1B	208.49	1	1	1	1	1	1	1	1	1	1	1	1	1	1	1	1	1	1	1	1	1	1	1	1	1	1	1	3	1	1	1	1	1	1	1	1	1	1	1	1	1	1	1	1	1	1	1
Ex_c19477_336	1B	208.49	1	1	1	1	1	1	1	1	1	1	1	1	1	1	1	1	1	1	1	1	1	1	1	1	1	1	1	3	1	1	1	1	1	1	1	1	1	1	1	1	1	1	1	1	1	1	1
Excalibur_c18876_334	1B	208.49	1	1	3	1	1	1	1	1	1	1	1	1	1	1	1	1	1	1	1	3	1	1	1	1	1	1	1	1	1	1	1	1	1	1	1	1	1	1	1	1	1	1	1	1	1	1	1
Excalibur_c32608_500	1B	208.49	3	3	1	3	3	3	3	3	3	3	3	3	3	3	3	3	3	3	3	3	3	3	3	3	3	3	3	3	3	3	3	3	3	3	3	3	3	3	3	3	3	3	3	3	3	3	3
Excalibur_rep_c101395_56	1B	208.49	3	3	3	3	3	3	3	3	1	1	3	3	3	3	3	3	3	1	3	3	3	3	3	3	3	3	3	3	3	3	3	3	1	3	3	3	3	3	3	3	3	3	1	3	3	3	3
Excalibur_rep_c106174_390	1B	208.49	3	3	1	3	3	3	3	3	3	3	3	3	3	3	3	3	3	3	3	3	3	3	3	3	3	3	3	3	3	3	3	3	3	3	3	3	3	3	3	3	3	3	3	3	3	3	3
Excalibur_rep_c67757_264	1B	208.49	1	1	3	1	1	1	1	1	1	1	1	1	1	1	1	1	1	1	1	1	1	1	1	1	1	1	1	1	1	1	1	1	1	1	1	1	1	1	1	1	1	1	1	1	1	1	1
Excalibur_s113941_196	1B	208.49	3	3	1	3	3	3	3	3	3	3	3	3	3	3	3	3	3	3	3	3	3	3	3	3	3	3	3	3	3	3	3	3	3	3	3	3	3	3	3	3	3	3	3	3	3	3	3
GENE.0528_131	1B	208.49	1	1	3	3	3	3	3	3	1	1	3	3	3	3	3	3	3	1	3	3	3	3	3	3	3	3	3	3	1	1	1	1	1	3	3	3	3	3	3	3	3	3	1	3	3	3	3
IAAV1158	1B	208.49	1	1	1	1	1	1	1	1	1	1	1	1	1	1	1	1	1	1	1	1	1	1	1	1	1	1	1	1	1	1	1	1	1	1	1	1	1	1	1	1	1	1	1	1	1	1	1
IAAV1869	1B	208.49	1	1	1	1	1	1	1	3	1	1	1	1	1	1	1	3	1	1	1	1	3	1	3	1	3	1	1	1	1	1	1	1	1	1	1	1	1	1	1	1	1	1	1	1	1	1	1
IAAV2764	1B	208.49	1	1	3	1	1	1	1	1	1	1	1	1	1	1	1	1	1	1	1	1	1	1	1	1	1	1	1	1	1	1	1	1	1	1	1	1	1	1	1	1	1	1	1	1	1	1	1
IAAV5246	1B	208.49	1	1	1	1	1	1	1	1	1	1	1	1	1	1	1	1	1	1	1	1	1	1	1	1	1	1	1	1	1	1	1	1	1	1	1	1	1	1	1	1	1	1	1	1	1	1	1
IACX8452	1B	208.49	1	1	1	1	1	1	1	1	1	1	1	1	1	1	1	1	1	1	1	1	1	1	1	1	1	1	1	3	1	1	1	1	1	1	1	1	1	1	1	1	1	1	1	1	1	1	1
Ku_c20833_518	1B	208.49	3	3	3	3	3	3	3	3	3	3	3	3	3	3	3	3	3	3	3	1	3	3	3	3	3	3	3	3	3	3	3	3	3	3	3	3	3	3	3	3	3	3	3	3	3	3	3
Ku_c3893_771	1B	208.49	1	1	1	1	1	1	1	3	1	1	1	1	1	1	1	3	1	1	1	3	3	1	3	1	3	1	1	1	1	1	1	1	1	1	1	1	1	1	1	1	1	1	1	1	1	1	1
Ku_c8767_1245	1B	208.49	1	1	1	1	1	1	1	3	1	1	1	1	1	1	1	3	1	1	1	1	3	NA	3	1	3	1	1	1	1	1	1	NA	1	1	1	1	1	1	1	1	1	1	1	1	1	1	1
Kukri_c10593_1064	1B	208.49	1	1	1	1	1	1	1	3	1	1	1	1	1	1	1	3	1	1	1	1	3	1	3	1	3	1	1	1	1	1	1	1	1	1	1	1	1	1	1	1	1	1	1	1	1	1	1
Kukri_c12936_1505	1B	208.49	3	3	1	3	3	3	3	3	3	3	3	3	3	3	3	3	3	3	3	3	3	3	3	3	3	3	3	3	3	3	3	3	3	3	3	3	3	3	3	3	3	3	3	3	3	3	3
Kukri_c14968_674	1B	208.49	3	3	3	3	3	3	3	3	1	1	3	3	3	3	3	3	3	1	3	3	3	3	3	3	3	3	3	3	3	3	3	3	1	3	3	3	3	3	3	3	3	3	1	3	3	3	3
Kukri_c19641_477	1B	208.49	3	3	3	3	3	3	3	3	3	3	3	3	3	3	3	3	3	3	3	3	3	3	3	3	3	3	3	1	3	3	3	3	3	3	3	3	3	3	3	3	3	3	3	3	3	3	3
Kukri_c27690_411	1B	208.49	1	1	1	1	1	1	1	1	1	1	1	1	1	1	1	1	1	1	1	1	1	1	1	1	1	1	1	3	1	1	1	1	1	1	1	1	1	1	1	1	1	1	1	1	1	1	1
Kukri_c37856_123	1B	208.49	3	3	3	3	3	3	3	1	3	3	3	3	3	3	3	1	3	3	3	3	1	3	1	3	1	3	3	3	3	3	3	3	3	3	3	3	3	3	3	3	3	3	3	3	3	3	3
Kukri_c4495_927	1B	208.49	3	3	3	3	3	3	3	3	3	3	3	3	3	3	3	3	3	3	3	3	3	3	3	3	1	3	3	3	3	3	3	3	3	3	3	3	3	3	3	3	3	3	3	3	3	3	3
Kukri_c6462_320	1B	208.49	1	1	1	1	1	1	1	3	1	1	1	1	1	1	1	3	1	1	1	1	3	NA	3	1	3	1	1	1	1	1	1	1	1	1	1	1	1	1	1	1	1	1	1	1	1	1	1
Kukri_c65759_98	1B	208.49	3	3	3	3	3	3	3	3	3	3	3	3	3	3	3	3	3	3	3	3	3	3	3	3	3	3	3	1	3	3	3	3	3	3	3	3	3	3	3	3	3	3	3	3	3	3	3
Kukri_c76762_166	1B	208.49	3	3	3	3	3	3	3	1	3	3	3	3	3	3	3	1	3	3	3	3	1	3	1	3	1	3	3	3	3	3	3	3	3	3	3	3	3	3	3	3	3	3	3	3	3	3	3
Kukri_c8308_245	1B	208.49	3	3	3	3	3	3	3	1	3	3	3	3	3	3	3	1	3	3	3	3	1	3	1	3	1	3	3	3	3	3	3	3	3	3	3	3	3	3	3	3	3	3	3	3	3	3	3
Kukri_rep_c101550_113	1B	208.49	1	1	3	1	1	1	1	3	1	1	1	NA	1	1	1	3	1	1	1	1	3	1	3	1	3	1	1	3	1	1	1	1	1	1	1	1	1	1	1	1	1	1	1	1	1	1	1
Kukri_rep_c106406_265	1B	208.49	1	1	3	1	1	1	1	1	1	1	1	1	1	1	1	1	1	1	1	1	1	1	1	1	1	1	1	1	1	1	1	1	1	1	1	1	1	1	1	1	1	1	1	1	1	1	1
Kukri_rep_c111517_289	1B	208.49	3	3	1	3	3	3	3	3	3	3	3	3	3	3	3	3	3	3	3	3	3	3	3	3	3	3	3	3	3	3	3	3	3	3	3	3	3	3	3	3	3	3	3	3	3	3	3
Kukri_rep_c70738_896	1B	208.49	3	3	3	3	3	3	3	1	3	3	3	3	3	3	3	1	3	3	3	3	1	3	1	3	1	3	3	3	3	3	3	3	3	3	3	3	3	3	3	3	3	3	3	3	3	3	3
Ra_c21902_654	1B	208.49	1	1	1	1	1	1	1	3	1	1	1	1	1	1	1	3	1	1	1	1	3	1	3	1	3	1	1	1	1	1	1	1	1	1	1	1	1	1	1	1	1	1	1	1	1	1	1
RAC875_c21274_235	1B	208.49	1	1	3	1	1	1	1	1	1	1	1	1	1	1	1	1	1	1	1	1	1	1	1	1	1	1	1	NA	1	1	1	1	1	1	1	1	1	1	1	1	1	1	1	1	1	1	1
RAC875_c3457_303	1B	208.49	3	3	1	3	3	3	3	3	3	3	3	3	3	3	3	3	3	3	3	3	3	3	3	3	3	3	3	3	3	3	3	3	3	3	3	3	3	3	3	3	3	3	3	3	3	3	3
RAC875_c8662_917	1B	208.49	1	1	3	1	1	1	1	1	1	1	1	1	1	1	1	1	1	1	1	1	1	1	1	1	1	1	1	1	1	1	1	1	1	1	1	1	1	1	1	1	1	1	1	1	1	1	1
RAC875_rep_c108085_570	1B	208.49	3	3	3	3	3	3	3	1	3	3	3	3	3	3	3	1	3	3	3	3	1	3	1	3	1	3	3	3	3	3	3	3	3	3	3	3	3	3	3	3	3	3	3	3	3	3	3
RAC875_rep_c87552_86	1B	208.49	3	3	3	3	3	3	3	3	3	3	3	3	3	3	3	3	3	3	3	3	3	3	3	3	3	3	3	1	3	3	3	3	3	3	3	3	3	3	3	3	3	3	3	3	3	3	3
RFL_Contig1354_484	1B	208.49	1	1	1	1	1	1	1	3	1	1	1	1	1	1	1	3	1	1	1	3	3	1	3	1	3	1	1	1	1	1	1	1	1	1	1	1	1	1	1	1	1	1	1	1	1	1	1
TA003204.1339	1B	208.49	3	3	3	3	3	3	3	3	1	1	3	3	3	3	3	3	3	1	3	3	3	3	3	3	3	3	3	3	3	3	3	3	1	3	3	3	3	3	3	3	3	3	1	3	3	3	3
TA004324.0491	1B	208.49	1	1	3	1	1	1	1	1	1	1	1	1	1	1	1	1	1	1	1	1	1	1	1	1	1	1	1	NA	1	1	1	1	1	1	1	1	1	1	1	1	1	1	1	1	1	1	1
TA005764.0704	1B	208.49	1	1	1	1	1	1	1	1	1	1	1	1	1	1	1	1	1	1	1	1	1	1	1	1	1	1	1	1	1	1	1	1	1	1	1	1	1	1	1	1	1	1	1	1	1	1	1
Tdurum_contig11660_328	1B	208.49	1	1	1	1	1	1	1	1	1	1	1	1	1	1	1	1	1	1	1	3	1	1	1	1	1	1	1	1	1	1	1	1	1	1	1	1	1	1	1	1	1	1	1	1	1	1	1
Tdurum_contig13335_194	1B	208.49	3	3	3	3	3	3	3	3	3	3	3	3	3	3	3	3	3	3	3	3	3	3	3	3	3	3	3	3	3	3	3	3	3	3	3	3	3	3	3	3	3	3	3	3	3	3	3
Tdurum_contig31149_408	1B	208.49	3	3	3	3	3	3	3	3	3	3	3	3	3	3	3	3	3	3	3	3	3	3	3	3	3	3	3	3	3	3	3	3	3	3	3	3	3	3	3	3	3	3	3	3	3	3	3
Tdurum_contig43910_1429	1B	208.49	1	1	1	1	1	1	1	1	1	1	1	1	1	1	1	1	1	1	1	1	1	1	1	1	1	1	1	1	1	1	1	1	1	1	1	1	1	1	1	1	1	1	1	1	1	1	1
Tdurum_contig47456_182	1B	208.49	3	3	3	3	3	3	3	1	3	3	3	3	3	3	3	1	3	3	3	3	1	3	1	3	1	3	3	3	3	3	3	3	3	3	3	3	3	3	3	3	3	3	3	3	3	3	3
Tdurum_contig51348_326	1B	208.49	1	1	1	1	1	1	1	1	1	1	1	NA	1	1	1	1	1	1	1	1	1	1	1	1	1	1	1	1	1	1	1	1	1	1	1	1	1	1	1	1	1	1	1	1	1	1	1
Tdurum_contig53888_107	1B	208.49	1	1	1	1	1	1	1	3	1	1	1	1	1	1	1	3	1	1	1	1	3	1	3	1	3	1	1	1	1	1	1	1	1	1	1	1	1	1	1	1	1	1	1	1	1	1	1
Tdurum_contig53888_350	1B	208.49	3	3	3	3	3	3	3	1	3	3	3	3	3	3	3	1	3	3	3	3	1	3	1	3	1	3	3	3	3	3	3	3	3	3	3	3	3	3	3	3	3	3	3	3	3	3	3
Tdurum_contig60547_129	1B	208.49	1	1	1	1	1	1	1	1	3	1	1	1	1	1	1	1	1	1	1	1	1	1	1	1	1	1	1	1	1	1	1	1	1	1	1	1	1	1	1	1	1	1	1	1	1	1	1
Tdurum_contig61425_242	1B	208.49	1	1	1	1	1	1	1	1	1	1	1	1	1	1	1	1	1	1	1	1	1	1	1	1	1	1	1	1	1	1	1	1	1	1	1	1	1	1	1	1	1	1	1	1	1	1	1
Tdurum_contig69821_141	1B	208.49	1	1	1	1	1	1	1	1	1	1	1	1	1	1	1	1	1	1	1	1	1	1	1	1	1	1	1	1	1	1	1	1	1	1	1	1	1	1	1	1	1	1	1	1	1	1	1
Tdurum_contig81435_288	1B	208.49	1	1	1	1	1	1	1	1	1	1	1	1	1	1	1	1	1	1	1	1	1	1	1	1	1	1	1	1	1	1	1	1	1	1	1	1	1	1	1	1	1	1	1	1	1	1	1
Tdurum_contig84184_124	1B	208.49	1	1	1	1	1	1	1	3	1	1	1	1	1	1	1	3	1	1	1	1	3	1	3	1	3	1	1	1	1	1	1	1	1	1	1	1	1	1	1	1	1	1	1	1	1	1	1
wsnp_Ex_c10233_16784994	1B	208.49	1	1	1	1	1	1	1	3	1	1	1	1	1	1	1	3	1	1	1	1	3	1	3	1	3	1	1	1	1	1	1	1	1	1	1	1	1	1	1	1	1	1	1	1	1	1	1
wsnp_Ex_c1429_2744367	1B	208.49	3	3	3	3	3	3	3	3	3	3	3	3	3	3	3	3	3	3	3	1	3	3	3	3	3	3	3	3	3	3	3	3	3	3	3	3	3	3	3	3	3	3	3	3	3	3	3
wsnp_Ex_c1429_2745237	1B	208.49	1	1	1	1	1	1	1	1	1	1	1	1	1	1	1	1	1	1	1	3	1	1	1	1	1	1	1	1	1	1	1	1	1	1	1	1	1	1	1	1	1	1	1	1	1	1	1
wsnp_Ex_c15934_24341135	1B	208.49	1	1	1	1	1	1	1	3	1	1	1	1	1	1	1	3	1	1	1	1	3	1	3	1	3	1	1	1	1	1	1	1	1	1	1	1	1	1	1	1	1	1	1	1	1	1	1
wsnp_Ex_c30805_39678077	1B	208.49	3	3	3	3	3	3	3	1	3	3	3	3	3	3	3	1	3	3	3	3	1	3	1	3	1	3	3	3	3	3	3	3	3	3	3	3	3	3	3	3	3	3	3	3	3	3	3
wsnp_Ex_c37635_45347415	1B	208.49	3	3	1	3	3	3	3	3	3	3	3	3	3	3	3	3	3	3	3	3	3	3	3	3	3	3	3	3	3	3	3	3	3	3	3	3	3	3	3	3	3	3	3	3	3	3	3
wsnp_Ex_c38116_45719983	1B	208.49	3	3	1	3	3	3	3	1	3	3	3	3	3	3	3	1	3	3	3	3	1	3	1	3	3	3	3	3	3	3	3	3	3	3	3	3	3	3	3	3	3	3	3	3	3	3	3
wsnp_Ex_c5947_10431109	1B	208.49	1	1	3	1	1	1	1	1	1	1	1	1	1	1	1	1	1	1	1	3	1	1	1	1	1	1	1	1	1	1	1	1	1	1	1	1	1	1	1	1	1	1	1	1	1	1	1
wsnp_Ex_c6022_10552811	1B	208.49	1	1	1	1	1	1	1	3	1	1	1	1	1	1	1	3	1	1	1	1	3	1	3	1	3	1	1	1	1	1	1	1	1	1	1	1	1	1	1	1	1	1	1	1	1	1	1
wsnp_Ex_c9902_16309166	1B	208.49	3	3	1	3	3	3	3	3	3	3	3	3	3	3	3	3	3	3	3	3	3	3	3	3	3	3	3	3	3	3	3	3	3	3	3	3	3	3	3	3	3	3	3	3	3	3	3
wsnp_Ex_rep_c68573_67416138	1B	208.49	3	3	3	3	3	3	3	1	3	3	3	3	3	3	3	1	3	3	3	3	1	3	1	3	1	3	3	3	3	3	3	3	3	3	3	3	3	3	3	3	3	3	3	3	3	3	3
wsnp_Ra_c21132_30487331	1B	208.49	1	1	3	1	1	1	1	1	1	1	1	1	1	1	1	1	1	1	1	1	1	1	1	1	1	1	1	1	1	1	1	1	1	1	1	1	1	1	1	1	1	1	1	1	1	1	1
BobWhite_c4236_410	1B	209.95	1	1	3	1	1	1	1	3	1	1	1	1	1	1	1	3	1	1	1	1	3	1	3	1	3	1	1	1	1	1	1	1	1	1	1	1	1	1	1	1	1	1	1	1	1	1	1
BS00009270_51	1B	209.95	1	1	1	1	1	1	1	1	1	1	1	1	1	1	1	1	1	1	1	1	1	1	1	1	1	1	1	1	1	1	1	1	1	1	1	1	1	1	1	1	1	1	1	1	1	1	1
BS00011333_51	1B	209.95	3	3	3	3	3	3	3	3	3	3	3	3	3	3	3	3	3	3	3	3	3	3	3	3	3	3	3	3	3	3	3	3	3	3	3	3	3	3	3	3	3	3	3	3	3	3	3
Excalibur_c1729_841	1B	209.95	1	1	1	1	1	1	1	1	1	1	1	1	1	1	1	1	1	1	1	1	1	1	1	1	1	1	1	1	1	1	1	1	1	1	1	1	1	1	1	1	1	1	1	1	1	1	1
IACX1008	1B	209.95	1	1	1	1	1	1	1	1	1	1	1	1	1	1	1	1	1	1	1	1	1	1	1	1	1	1	1	1	1	1	1	1	1	1	1	1	1	1	1	1	1	1	1	1	1	1	1
IACX7450	1B	209.95	1	1	1	1	1	1	1	1	1	1	1	1	1	1	1	1	1	1	1	1	1	1	1	1	1	1	1	1	1	1	1	1	1	1	1	1	1	1	1	1	1	1	1	1	1	1	1
Ku_c17486_152	1B	209.95	3	3	3	3	3	3	3	3	3	3	3	3	3	3	3	3	3	3	3	3	3	3	3	3	3	3	3	3	3	3	3	3	3	3	3	3	3	3	3	3	3	3	3	3	3	3	3
Kukri_c13349_176	1B	209.95	3	3	3	3	3	3	3	3	3	3	3	3	3	3	3	3	3	3	3	3	3	3	3	3	3	3	3	3	3	3	3	3	3	3	3	3	3	3	3	3	3	3	3	3	3	3	3
Kukri_c49091_371	1B	209.95	1	1	3	1	1	1	1	3	1	1	1	1	1	NA	1	3	1	1	1	1	3	1	3	1	1	1	1	1	1	1	1	1	1	1	1	1	1	1	1	1	1	1	1	1	1	1	1
Kukri_rep_c69383_56	1B	209.95	3	3	3	3	3	3	3	3	3	3	3	3	3	3	3	3	3	3	3	3	3	3	3	3	3	3	3	3	3	3	3	3	3	3	3	3	3	3	3	3	3	3	3	3	3	3	3
Kukri_rep_c69383_83	1B	209.95	3	3	3	3	3	3	3	3	3	3	3	3	3	3	3	3	3	3	3	3	3	3	3	3	3	3	3	3	3	3	3	3	3	3	3	3	3	3	3	3	3	3	3	3	3	3	3
Kukri_rep_c71291_155	1B	209.95	3	3	3	3	3	3	3	3	3	3	3	3	3	3	3	3	3	3	3	3	3	3	3	3	3	3	3	3	3	3	3	3	3	3	3	3	3	3	3	3	3	3	3	3	3	3	3
RAC875_c42206_305	1B	209.95	3	3	3	3	3	3	3	3	3	3	3	3	3	3	3	3	3	3	3	3	3	3	3	3	3	3	3	3	3	3	3	3	3	3	3	3	3	3	3	3	3	3	3	3	3	3	3
Tdurum_contig43346_108	1B	209.95	3	3	3	3	3	3	3	1	3	3	3	3	3	3	3	1	3	3	3	3	1	3	1	3	1	3	3	3	3	3	3	3	3	3	3	3	3	3	3	3	3	3	3	3	3	3	3
tplb0059c20_2221	1B	209.95	3	3	3	3	3	3	3	3	3	3	3	3	3	3	3	3	3	3	3	3	3	3	3	3	3	3	3	1	3	3	3	3	3	3	3	3	3	3	3	3	3	3	3	3	3	3	3
wsnp_Ku_c3710_6836438	1B	209.95	3	3	3	3	3	3	3	3	3	3	3	3	3	3	3	3	3	3	3	3	3	3	3	3	3	3	3	3	3	3	3	3	3	3	3	3	3	3	3	3	3	3	3	3	3	3	3
wsnp_RFL_Contig4726_5654774	1B	209.95	1	1	3	1	1	1	1	3	1	1	1	1	1	1	1	3	1	1	1	1	3	1	3	1	3	1	1	3	1	1	1	1	1	1	1	1	1	1	1	1	1	1	1	1	1	1	1
BobWhite_c7577_69	1B	210.15	1	1	1	1	1	1	1	3	1	1	1	1	1	1	1	3	1	1	1	1	3	1	3	1	3	1	1	1	1	1	1	1	1	1	1	1	1	1	1	1	1	1	1	1	1	1	1
CAP7_rep_c10850_139	1B	210.15	1	1	1	1	1	1	1	3	1	1	1	1	1	1	1	3	1	1	1	1	3	1	3	1	3	1	1	1	1	1	1	1	1	1	1	1	1	1	1	1	1	1	1	1	1	1	1
CAP7_rep_c7114_55	1B	210.15	3	3	3	3	3	3	3	1	3	3	3	3	3	3	3	1	3	3	3	3	1	3	1	3	1	3	3	3	3	3	3	3	3	3	3	3	3	3	3	3	3	3	3	3	3	3	3
Ex_c34713_501	1B	210.15	1	1	1	1	1	1	1	3	1	1	1	1	1	1	1	3	1	1	1	1	3	1	3	1	3	1	1	1	1	1	1	1	1	1	1	1	1	1	1	1	1	1	1	1	1	1	1
Excalibur_c3140_697	1B	210.15	3	3	3	3	3	3	3	1	3	3	3	3	3	3	3	1	3	3	3	3	1	3	1	3	1	3	3	3	3	3	3	3	3	3	3	3	3	3	3	3	3	3	3	3	3	3	3
GENE.0116_102	1B	210.15	1	1	1	1	1	1	1	3	1	1	1	1	1	1	1	3	1	1	1	1	3	1	3	1	3	1	1	1	1	1	1	1	1	1	1	1	1	1	1	1	1	1	1	1	1	1	1
GENE.0193_197	1B	210.15	1	1	1	1	1	1	1	3	1	1	1	1	1	1	1	3	1	1	1	1	3	1	3	1	3	1	1	1	1	1	1	1	1	1	1	1	1	1	1	1	1	1	1	1	1	1	1
GENE.1214_159	1B	210.15	3	3	3	3	3	3	3	1	3	3	3	3	3	3	3	1	3	3	3	3	1	3	1	3	1	3	3	3	3	3	3	3	3	3	3	3	3	3	3	3	3	3	3	3	3	3	3
Ku_c42700_2798	1B	210.15	1	1	1	1	1	1	1	3	1	1	1	1	1	1	1	3	1	1	1	1	3	1	3	1	3	1	1	1	1	1	1	1	1	1	1	1	1	1	1	1	1	1	1	1	1	1	1
Kukri_c2297_181	1B	210.15	3	3	3	3	3	3	3	1	3	3	3	3	3	3	3	1	3	3	3	3	1	3	1	3	1	3	3	3	3	3	3	3	3	3	3	3	3	3	3	3	3	3	3	3	3	3	3
Kukri_rep_c95031_104	1B	210.15	1	1	1	1	1	1	1	3	1	1	1	1	1	1	1	3	1	1	1	1	3	1	3	1	3	1	1	1	1	1	1	1	1	1	1	1	1	1	1	1	1	1	1	1	1	1	1
Ra_c23839_884	1B	210.15	1	1	1	1	1	1	1	3	1	1	1	1	1	1	1	3	1	1	1	1	3	1	3	1	3	1	1	1	1	1	1	1	1	1	1	1	1	1	1	1	1	1	1	1	1	1	1
Ra_c33845_794	1B	210.15	3	3	3	3	3	3	3	1	3	3	3	3	3	3	3	1	3	3	3	3	1	3	1	3	1	3	3	3	3	3	3	3	3	3	3	3	3	3	3	3	3	3	3	3	3	3	3
RAC875_c21842_1647	1B	210.15	3	3	3	3	3	3	3	1	3	3	3	3	3	3	3	1	3	3	3	3	1	3	1	3	1	3	3	3	3	3	3	3	3	3	3	3	3	3	3	3	3	3	3	3	3	3	3
RAC875_c24109_600	1B	210.15	1	1	1	1	1	1	1	3	1	1	1	1	1	1	1	3	1	1	1	1	3	1	3	1	3	1	1	1	1	1	1	1	1	1	1	1	1	1	1	1	1	1	1	1	1	1	1
Tdurum_contig11877_414	1B	210.15	3	3	3	3	3	3	3	1	3	3	3	3	3	3	3	1	3	3	3	3	1	3	1	3	1	3	3	3	3	3	3	3	3	3	3	3	3	3	3	3	3	3	3	3	3	3	3
Tdurum_contig65023_587	1B	210.15	1	1	1	1	1	1	1	3	1	1	1	1	1	1	1	3	1	1	1	1	3	1	3	1	3	1	1	1	1	1	1	1	1	1	1	1	1	1	1	1	1	1	1	1	1	1	1
wsnp_Ex_rep_c66802_65172754	1B	210.15	3	3	3	3	3	3	3	1	3	3	3	3	3	3	3	1	3	3	3	3	1	3	1	3	1	3	3	3	3	3	3	3	3	3	3	3	3	3	3	3	3	3	3	3	3	3	3
wsnp_Ku_c16117_24917524	1B	210.15	1	1	1	1	1	1	1	3	1	1	1	1	1	1	1	3	1	1	1	1	3	1	3	1	3	1	1	1	1	1	1	1	1	1	1	1	1	1	1	1	1	1	1	1	1	1	1
wsnp_Ku_c66585_65967792	1B	210.15	1	1	1	1	1	1	1	3	1	1	1	1	1	1	1	3	1	1	1	1	3	1	3	1	3	1	1	1	1	1	1	1	1	1	1	1	1	1	1	1	1	1	1	1	1	1	1
wsnp_Ku_c9014_15193623	1B	210.15	1	1	1	1	1	1	1	3	1	1	1	1	1	1	1	3	1	1	1	1	3	1	3	1	3	1	1	1	1	1	1	1	1	1	1	1	1	1	1	1	1	1	1	1	1	1	1
BobWhite_c43322_203	1B	212.19	1	1	1	1	1	1	1	3	1	1	1	1	1	1	1	3	1	1	1	1	3	1	3	1	3	1	1	1	1	1	1	1	1	1	1	1	1	1	1	1	1	1	1	1	1	1	1
BS00021900_51	1B	212.19	3	3	3	3	3	3	3	3	3	3	3	3	3	3	3	3	3	3	3	3	3	3	3	3	3	3	3	3	3	3	3	3	3	3	3	3	3	3	3	3	3	3	3	3	3	3	3
BS00052075_51	1B	212.19	3	3	3	3	3	3	3	1	3	3	3	3	3	3	3	1	3	3	3	3	1	3	1	3	1	3	3	3	3	3	3	3	3	3	3	3	3	3	3	3	3	3	3	3	3	3	3
BS00052089_51	1B	212.19	3	3	3	3	3	3	3	1	3	3	3	3	3	3	3	1	3	3	3	3	1	3	1	3	1	3	3	3	3	3	3	3	3	3	3	3	3	3	3	3	3	3	3	3	3	3	3
BS00063113_51	1B	212.19	1	1	1	1	1	1	1	3	1	1	1	1	1	1	1	3	1	1	1	1	3	1	3	1	3	1	1	1	1	1	1	1	1	1	1	1	1	1	1	1	1	1	1	1	1	1	1
BS00087451_51	1B	212.19	1	1	1	1	1	1	1	1	1	1	1	1	1	1	1	1	1	1	1	1	1	1	1	1	1	1	1	1	1	1	1	1	1	1	1	1	1	1	1	1	1	1	1	1	1	1	1
BS00101500_51	1B	212.19	3	3	3	3	3	3	3	3	3	3	3	3	3	3	3	3	3	3	3	3	3	3	3	3	3	3	3	3	3	3	3	3	3	3	3	3	3	3	3	3	3	3	3	3	3	3	3
CAP11_c1969_268	1B	212.19	3	3	3	3	3	3	3	1	3	3	3	3	3	3	3	1	3	3	3	3	1	3	1	3	1	3	3	3	3	3	3	3	3	3	3	3	3	3	3	3	3	3	3	3	3	3	3
CAP7_c302_518	1B	212.19	3	3	3	3	3	3	3	1	3	3	3	3	3	3	3	1	3	3	3	3	1	3	1	3	1	3	3	3	3	3	3	3	3	3	3	3	3	3	3	3	3	3	3	3	3	3	3
Ex_c11539_279	1B	212.19	3	1	1	3	1	1	3	1	1	1	3	1	1	3	3	1	3	1	3	1	1	3	1	3	1	3	3	1	3	1	1	1	1	3	3	1	1	3	3	1	3	3	1	3	1	3	3
IAAV178	1B	212.19	1	1	1	1	1	1	1	3	1	1	1	1	1	1	1	3	1	1	1	1	3	1	3	1	3	1	1	1	1	1	1	1	1	1	1	1	1	1	1	1	1	1	1	1	1	1	1
IACX184	1B	212.19	3	3	3	3	3	3	3	1	3	3	3	3	3	3	3	1	3	3	3	3	1	3	1	3	1	3	3	3	3	3	3	3	3	3	3	3	3	3	3	3	3	3	3	3	3	3	3
Kukri_rep_c88171_730	1B	212.19	3	3	3	3	3	3	3	1	3	3	3	3	3	3	3	1	3	3	3	3	1	3	NA	3	1	3	3	3	3	3	3	3	3	3	3	3	3	3	3	3	3	3	3	3	3	3	3
Ra_c18323_183	1B	212.19	1	1	1	1	1	1	1	3	1	1	1	1	1	1	1	3	1	1	1	1	3	1	3	1	3	1	1	1	1	1	1	1	1	1	1	1	1	1	1	1	1	1	1	1	1	1	1
RAC875_c22244_61	1B	212.19	1	1	1	1	1	1	1	1	1	1	1	1	1	1	1	1	1	1	1	1	1	1	1	1	1	1	1	1	1	1	1	1	1	1	1	1	1	1	1	1	1	1	1	1	1	1	1
RAC875_c44575_561	1B	212.19	3	3	1	3	3	3	3	1	3	3	3	3	3	3	3	1	3	3	3	3	1	3	1	3	3	3	3	3	3	3	3	3	3	3	3	3	3	3	3	3	3	3	3	3	3	3	3
RAC875_c5227_1385	1B	212.19	1	1	1	1	1	1	1	3	1	1	1	1	1	NA	1	3	1	1	1	1	3	1	3	1	3	1	1	1	1	1	1	1	1	1	1	1	1	1	1	1	1	1	1	1	1	1	1
RAC875_rep_c70803_1442	1B	212.19	3	3	1	3	3	3	3	1	3	3	3	3	3	3	3	1	3	3	3	3	1	3	1	3	3	3	3	3	3	3	3	3	3	3	3	3	3	3	3	3	3	3	3	3	3	3	3
Tdurum_contig10326_151	1B	212.19	1	1	1	1	1	1	1	3	1	1	1	1	1	1	1	3	1	1	1	1	3	1	3	1	3	1	1	1	1	1	1	1	1	1	1	1	1	1	1	1	1	1	1	1	1	1	1
Tdurum_contig42856_1271	1B	212.19	1	1	1	1	1	1	1	3	1	1	1	1	1	1	1	3	1	1	1	1	3	1	3	1	3	1	1	1	1	1	1	1	1	1	1	1	1	1	1	1	1	1	1	1	1	1	1
Tdurum_contig46780_203	1B	212.19	3	3	3	3	3	3	3	1	3	3	3	3	3	3	3	1	3	3	3	3	1	3	1	3	1	3	3	3	3	3	3	3	3	3	3	3	3	3	3	3	3	3	3	3	3	3	3
wsnp_be443797B_Ta_2_1	1B	212.19	1	1	1	1	1	1	1	3	1	1	1	1	1	1	1	3	1	1	1	1	3	1	3	1	3	1	1	1	1	1	1	1	1	1	1	1	1	1	1	1	1	1	1	1	1	1	1
wsnp_Ex_c7629_13033231	1B	212.19	1	1	1	1	1	1	1	1	1	1	1	1	1	1	1	1	1	1	1	1	1	1	1	1	1	1	1	1	1	1	1	1	1	1	1	1	1	1	1	1	1	1	1	1	1	1	1
wsnp_Ku_c1772_3465811	1B	212.19	1	1	1	1	1	1	1	1	1	1	1	1	1	1	1	1	1	1	1	1	1	1	1	1	1	1	1	1	1	1	1	1	1	1	1	1	1	1	1	1	1	1	1	1	1	1	1
wsnp_Ku_c30982_40765254	1B	212.19	1	1	3	1	1	1	1	3	1	1	1	1	1	1	1	3	1	1	1	1	3	1	3	1	1	1	1	1	1	1	1	1	1	1	1	1	1	1	1	1	1	1	1	1	1	1	1
wsnp_RFL_Contig2446_2008649	1B	212.19	3	3	3	3	3	3	3	3	3	3	3	3	3	3	3	3	3	3	3	3	3	3	3	3	3	3	3	3	3	3	3	3	3	3	3	3	3	3	3	3	3	3	3	3	3	3	3
Kukri_c49091_415	1B	212.47	1	1	1	1	1	1	1	1	1	1	1	1	1	1	1	1	1	1	1	1	1	1	1	1	1	1	1	1	1	1	1	1	1	1	1	1	1	1	1	1	1	1	1	1	1	1	1
BS00062740_51	1B	212.96	3	3	3	3	3	3	3	1	3	3	3	3	3	3	3	1	3	3	3	3	1	3	1	3	1	3	3	3	3	3	3	3	3	3	3	3	3	3	3	3	3	3	3	3	3	3	3
Excalibur_c39191_82	1B	212.96	3	3	3	3	3	3	3	1	3	3	3	3	3	3	3	1	3	3	3	3	1	3	1	3	1	3	3	3	3	3	3	3	3	3	3	3	3	3	3	3	3	3	3	3	3	3	3
Kukri_rep_c108436_534	1B	212.96	1	1	1	1	1	1	1	3	1	1	1	1	1	1	1	3	1	1	1	1	3	1	3	1	3	1	1	1	1	1	1	1	1	1	1	1	1	1	1	1	1	1	1	1	1	1	1
BobWhite_c1318_691	1B	214.26	1	1	1	1	1	1	1	3	1	1	1	1	1	1	1	3	1	1	1	1	3	1	3	1	3	1	1	1	1	1	1	1	1	1	1	1	1	1	1	1	1	1	1	1	1	1	1
Ex_c25180_1615	1B	214.8	1	1	1	1	1	1	1	1	1	1	1	1	1	1	1	1	1	1	1	1	1	1	1	1	1	1	1	1	1	1	1	1	1	1	1	1	1	1	1	1	1	1	1	1	1	1	1
Excalibur_c29029_424	1B	214.8	3	3	3	3	3	3	3	3	3	3	3	3	3	3	3	3	3	3	3	3	3	3	3	3	3	3	3	3	3	3	3	3	3	3	3	3	3	3	3	3	3	3	3	3	3	3	3
Kukri_c31288_772	1B	214.8	3	3	3	3	3	3	3	3	3	3	3	3	3	3	3	3	3	3	3	3	3	3	3	3	3	3	3	3	3	3	3	3	3	3	3	3	3	3	3	3	3	3	3	3	3	3	3
wsnp_Ex_c25180_34445112	1B	214.8	3	3	3	3	3	3	3	3	3	3	3	3	3	3	3	3	3	3	3	3	3	3	3	3	3	3	3	3	3	3	3	3	3	3	3	3	3	3	3	3	3	3	3	3	3	3	3
Ex_c2051_225	1B	214.97	3	3	3	3	3	3	3	3	3	3	3	3	3	3	3	3	3	3	3	1	3	3	3	3	3	3	3	3	3	3	3	3	3	3	3	3	3	3	3	3	3	3	3	3	3	3	3
BS00011712_51	1B	215.54	1	1	1	1	1	1	1	3	1	1	1	1	1	1	1	3	1	1	1	1	3	1	3	1	3	1	1	1	1	1	1	1	1	1	1	1	1	1	1	1	1	1	1	1	1	1	1
BS00021946_51	1B	215.54	1	1	1	1	1	1	1	3	1	1	1	1	1	1	1	3	1	1	1	1	3	1	3	1	3	1	1	1	1	1	1	1	1	1	1	1	1	1	1	1	1	1	1	1	1	1	1
BS00021947_51	1B	215.54	3	3	3	3	3	3	3	1	3	3	3	3	3	3	3	1	3	3	3	3	1	3	1	3	1	3	3	3	3	3	3	3	3	3	3	3	3	3	3	3	3	3	3	3	3	3	3
BS00067434_51	1B	215.54	3	3	3	3	3	3	3	1	3	3	3	3	3	3	3	1	3	3	3	3	1	3	1	3	1	3	3	3	3	3	3	3	3	3	3	3	3	3	3	3	3	3	3	3	3	3	3
BS00094498_51	1B	215.54	3	3	3	3	3	3	3	1	3	3	3	3	3	3	3	1	3	3	3	3	1	3	1	3	1	3	3	3	3	3	3	3	3	3	3	3	3	3	3	3	3	3	3	3	3	3	3
BS00094499_51	1B	215.54	1	1	1	1	1	1	1	3	1	1	1	1	1	1	1	3	1	1	1	1	3	1	3	1	3	1	1	1	1	1	1	1	1	1	1	1	1	1	1	1	1	1	1	1	1	1	1
BS00097477_51	1B	215.54	3	3	3	3	3	3	3	1	3	3	3	3	3	3	3	1	3	3	3	3	1	3	1	3	1	3	3	3	3	3	3	3	3	3	3	3	3	3	3	3	3	3	3	3	3	3	3
D_contig17842_656	1B	215.54	3	3	3	3	3	3	3	1	3	3	3	3	3	3	3	1	3	3	3	3	1	3	1	3	1	3	3	3	3	3	3	3	3	3	3	3	3	3	3	3	3	3	3	3	3	3	3
Excalibur_c34625_281	1B	215.54	1	1	1	1	1	1	1	1	1	1	1	1	1	1	1	1	1	1	1	1	1	1	1	1	1	1	1	1	1	1	1	1	3	1	1	1	3	1	1	1	1	1	3	1	1	1	1
IAAV3905	1B	215.54	3	1	1	3	3	3	3	1	1	1	3	1	3	3	3	1	3	1	3	1	1	3	1	3	1	3	3	1	3	1	1	1	1	3	3	3	3	3	3	3	3	3	1	3	3	3	3
JD_c64600_281	1B	215.54	3	3	3	3	3	3	3	1	3	3	3	3	3	3	3	1	3	3	3	3	1	3	1	3	1	3	3	3	3	3	3	3	3	3	3	3	3	3	3	3	3	3	3	3	3	3	3
Ku_c13515_171	1B	215.54	3	3	3	3	3	3	3	1	3	3	3	3	3	3	3	1	3	3	3	3	1	3	1	3	1	3	3	3	3	3	3	3	3	3	3	3	3	3	3	3	3	3	3	3	3	3	3
Kukri_c75399_226	1B	215.54	1	1	1	1	1	1	1	3	1	1	1	1	1	1	1	3	1	1	1	1	3	1	3	1	3	1	1	1	1	1	1	1	1	1	1	1	1	1	1	1	1	1	1	1	1	1	1
Kukri_c75399_389	1B	215.54	3	3	3	3	3	3	3	3	3	3	3	3	3	3	3	1	3	3	3	3	1	3	1	3	1	3	3	3	3	3	3	3	3	3	3	3	3	3	3	3	3	3	3	3	3	3	3
RAC875_c37780_94	1B	215.54	3	3	3	3	3	3	3	3	3	3	3	3	3	3	3	3	3	3	3	3	3	3	3	3	3	3	3	3	3	3	3	3	1	3	3	3	1	3	3	3	3	3	1	3	3	3	3
RAC875_c38384_450	1B	215.54	3	3	3	3	3	3	3	3	3	3	3	3	3	3	3	1	3	3	3	3	1	3	1	3	1	3	3	3	3	3	3	3	3	3	3	3	3	3	3	3	3	3	3	3	3	3	3
TA005233.0508	1B	215.54	1	1	1	1	1	1	1	3	1	1	1	1	1	1	1	3	1	1	1	1	3	1	3	1	3	1	1	1	1	1	1	1	1	1	1	1	1	1	1	1	1	1	1	1	1	1	1
Tdurum_contig42217_127	1B	215.54	1	1	1	1	1	1	1	3	1	1	1	NA	1	1	1	3	1	1	1	1	3	1	3	1	3	1	1	1	1	1	1	1	1	1	1	1	1	1	1	1	1	1	1	1	1	1	1
Tdurum_contig43910_1113	1B	215.54	3	3	3	3	3	3	3	1	3	3	3	3	3	3	3	1	3	3	3	3	1	3	1	3	1	3	3	3	3	3	3	3	3	3	3	3	3	3	3	3	3	3	3	3	3	3	3
Tdurum_contig43910_687	1B	215.54	1	1	1	1	1	1	1	3	1	1	1	1	1	1	1	3	1	1	1	1	3	1	3	1	3	1	1	1	1	1	1	1	1	1	1	1	1	1	1	1	1	1	1	1	1	1	1
Tdurum_contig87816_268	1B	215.54	3	3	3	3	3	3	3	1	3	3	3	3	3	3	3	1	3	3	3	3	1	3	1	3	1	3	3	3	3	3	3	3	3	3	3	3	3	3	3	3	3	3	3	3	3	3	3
wsnp_BE442716B_Ta_2_1	1B	215.54	1	1	1	1	1	1	1	3	1	1	1	1	1	1	1	3	1	1	1	1	3	1	3	1	3	1	1	1	1	1	1	1	1	1	1	1	1	1	1	1	1	1	1	1	1	1	1
wsnp_BE442716B_Ta_2_2	1B	215.54	3	3	3	3	3	3	3	1	3	3	3	3	3	3	3	1	3	3	3	3	1	3	1	3	1	3	3	3	3	3	3	3	3	3	3	3	3	3	3	3	3	3	3	3	3	3	3
BobWhite_c11460_291	1B	216.28	1	1	1	1	1	1	1	3	1	1	1	1	1	1	1	3	1	1	1	1	3	1	3	1	3	1	1	1	1	1	1	1	1	1	1	1	1	1	1	1	1	1	1	1	1	1	1
BS00022581_51	1B	216.28	3	3	3	3	3	3	3	1	3	3	3	3	3	3	3	1	3	3	3	3	1	3	1	3	1	3	3	3	3	3	3	3	3	3	3	3	3	3	3	3	3	3	3	3	3	3	3
BS00060270_51	1B	216.28	3	3	3	3	3	3	3	1	3	3	3	3	3	3	3	1	3	3	3	3	1	3	1	3	1	3	3	3	3	3	3	3	3	3	3	3	3	3	3	3	3	3	3	3	3	3	3
BS00071555_51	1B	216.28	3	3	NA	3	3	3	3	1	3	3	3	3	3	3	3	1	3	3	3	3	1	3	1	3	1	3	3	3	3	3	3	3	3	3	3	3	3	3	3	3	3	3	3	3	3	3	3
BS00110148_51	1B	216.28	1	1	1	1	1	1	1	3	1	1	1	1	1	1	1	3	1	1	1	1	3	1	1	1	3	1	1	1	1	1	1	1	1	1	1	1	1	1	1	1	1	1	1	1	1	1	1
Excalibur_c57972_116	1B	216.28	1	1	1	1	1	1	1	3	1	1	1	1	1	1	1	3	1	1	1	1	3	1	3	1	3	1	1	1	1	1	1	1	1	1	1	1	1	1	1	1	1	1	1	1	1	1	1
GENE.0235_131	1B	216.28	3	3	3	3	3	3	3	1	3	3	3	3	3	3	3	1	3	3	3	3	1	3	1	3	1	3	3	3	3	3	3	3	3	3	3	3	3	3	3	3	3	3	3	3	3	3	3
GENE.0283_96	1B	216.28	3	3	3	3	3	3	3	1	3	3	3	3	3	3	3	1	3	3	3	3	1	3	3	3	1	3	3	3	3	3	3	3	3	3	3	3	3	3	3	3	3	3	3	3	3	3	3
GENE.3334_199	1B	216.28	1	1	1	1	1	1	1	3	1	1	1	1	1	1	1	3	1	1	1	1	3	1	3	1	3	1	1	1	1	1	1	1	1	1	1	1	1	1	1	1	1	1	1	1	1	1	1
GENE.4605_536	1B	216.28	3	3	3	3	3	3	3	1	3	3	3	3	3	3	3	1	3	3	3	3	1	3	3	3	1	3	3	3	3	3	3	3	3	3	3	3	3	3	3	3	3	3	3	3	3	3	3
IACX2701	1B	216.28	3	3	3	3	3	3	3	1	3	3	3	3	3	3	3	1	3	3	3	3	1	3	3	3	1	3	3	3	3	3	3	3	3	3	3	3	3	3	3	3	3	3	3	3	3	3	3
Kukri_c20927_339	1B	216.28	1	1	1	1	1	1	1	3	1	1	1	1	1	1	1	3	1	1	1	1	3	1	1	1	3	1	1	1	1	1	1	1	1	1	1	1	1	1	1	1	1	1	1	1	1	1	1
RFL_Contig981_1985	1B	216.28	3	3	3	3	3	3	3	1	3	3	3	3	3	3	3	1	3	3	3	3	1	3	3	3	1	3	3	3	3	3	3	3	3	3	3	3	3	3	3	3	3	3	3	3	3	3	3
Tdurum_contig8081_2331	1B	216.28	3	3	3	3	3	3	3	1	3	3	3	3	3	3	3	1	3	3	3	3	1	3	1	3	1	3	3	3	3	3	3	3	3	3	3	3	3	3	3	3	3	3	3	3	3	3	3
BobWhite_c11235_370	1B	218.35	3	3	3	3	3	3	3	1	3	3	3	3	3	3	3	1	3	3	3	3	1	3	3	3	1	3	3	3	3	3	3	3	3	3	3	3	3	3	3	3	3	3	3	3	3	3	3
BS00011390_51	1B	218.35	3	3	3	3	3	3	3	1	3	3	3	3	3	3	3	1	3	3	3	1	1	3	3	3	1	3	3	3	3	3	3	3	3	3	3	3	3	3	3	3	3	3	3	3	3	3	3
BS00030770_51	1B	218.35	3	3	3	3	3	3	3	3	3	3	3	3	3	3	3	3	3	3	3	3	3	3	3	3	3	3	3	3	3	3	3	3	3	3	3	3	3	3	3	3	3	3	3	3	3	3	3
BS00038929_51	1B	218.35	1	1	1	1	1	1	1	3	1	1	1	1	1	1	1	3	1	1	1	1	3	1	1	1	3	1	1	1	1	1	1	1	1	1	1	1	1	1	1	1	1	1	1	1	1	1	1
BS00070139_51	1B	218.35	1	1	1	1	1	1	1	3	1	1	1	1	1	1	1	3	1	1	1	1	3	1	1	1	3	1	1	1	1	1	1	1	1	1	1	1	1	1	1	1	1	1	1	1	1	1	1
BS00071083_51	1B	218.35	3	3	3	3	3	3	3	1	3	3	3	3	3	3	3	1	3	3	3	3	1	3	3	3	1	3	3	3	3	3	3	3	3	3	3	3	3	3	3	3	3	3	3	3	3	3	3
BS00075663_51	1B	218.35	3	3	3	3	3	3	3	1	3	3	3	3	3	3	3	1	3	3	3	3	1	3	3	3	1	3	3	3	3	3	3	3	3	3	3	3	3	3	3	3	3	3	3	3	3	3	3
BS00076696_51	1B	218.35	3	3	3	3	3	3	3	1	3	3	3	3	3	3	3	1	3	3	3	3	1	3	3	3	1	3	3	3	3	3	3	3	3	3	3	3	3	3	3	3	3	3	3	3	3	3	3
BS00093841_51	1B	218.35	3	3	3	3	3	3	3	1	3	3	3	3	3	3	3	1	3	3	3	1	1	3	3	3	1	3	3	3	3	3	3	3	3	3	3	3	3	3	3	3	3	3	3	3	3	3	3
BS00110149_51	1B	218.35	1	1	1	1	1	1	1	1	1	1	1	1	1	1	1	1	1	1	1	1	1	1	1	1	1	1	1	1	1	1	1	1	1	1	1	1	1	1	1	1	1	1	1	1	1	1	1
BS00110480_51	1B	218.35	3	3	3	3	3	3	3	1	3	3	3	3	3	3	3	3	3	3	3	1	3	3	3	3	3	3	3	3	3	3	3	3	3	3	3	3	3	3	3	3	3	3	3	3	3	3	3
Excalibur_c1841_368	1B	218.35	1	1	1	1	1	1	1	3	1	1	1	1	1	1	1	3	1	1	1	1	3	1	1	1	3	1	1	1	1	1	1	1	1	1	1	1	1	1	1	1	1	1	1	1	1	1	1
Excalibur_c59016_839	1B	218.35	1	1	1	1	1	1	1	3	1	1	1	1	1	1	1	3	1	1	1	1	3	1	1	1	3	1	1	1	1	1	1	1	1	1	1	1	1	1	1	1	1	1	1	1	1	1	1
GENE.3085_533	1B	218.35	1	1	1	1	1	1	1	3	1	1	1	1	1	1	1	3	1	1	1	1	3	1	1	1	3	1	1	1	1	1	1	1	1	1	1	1	1	1	1	1	1	1	1	1	1	1	1
IAAV6825	1B	218.35	3	3	3	3	3	3	3	1	3	3	3	3	3	3	3	1	3	3	3	3	1	3	3	3	1	3	3	3	3	3	3	3	3	3	3	3	3	3	3	3	3	3	3	3	3	3	3
IACX5814	1B	218.35	3	3	3	3	3	3	3	1	3	3	3	3	3	3	3	1	3	3	3	3	1	3	3	3	1	3	3	3	3	3	3	3	3	3	3	3	3	3	3	3	3	3	3	3	3	3	3
Kukri_c12151_467	1B	218.35	1	1	1	1	1	1	1	3	1	1	1	1	1	1	1	3	1	1	1	1	3	1	1	1	3	1	1	1	1	1	1	1	1	1	1	1	1	1	1	1	1	1	1	1	1	1	1
Kukri_c12151_769	1B	218.35	1	1	1	1	1	1	1	3	1	1	1	1	1	1	1	3	1	1	1	1	3	1	1	1	3	1	1	1	1	1	1	1	1	1	1	1	1	1	1	1	1	1	1	1	1	1	1
RAC875_c16136_1597	1B	218.35	1	1	1	1	1	1	1	1	3	1	1	1	1	1	1	1	1	1	1	1	1	1	3	1	1	1	1	1	1	1	1	1	1	1	1	1	1	1	1	1	3	1	1	1	1	1	1
RAC875_c24337_1280	1B	218.35	3	3	3	3	3	3	3	1	3	3	3	3	3	3	3	1	3	3	3	3	1	3	3	3	1	3	3	3	3	3	3	3	3	3	3	3	3	3	3	3	3	3	3	3	3	3	3
RAC875_c32894_1038	1B	218.35	3	3	3	3	3	3	3	1	3	3	3	3	3	3	3	1	3	3	3	3	1	3	3	3	1	3	3	3	3	3	3	3	3	3	3	3	3	3	3	3	3	3	3	3	3	3	3
RAC875_c5796_424	1B	218.35	1	1	1	1	1	1	1	3	1	1	1	1	1	1	1	3	1	1	1	1	3	1	1	1	3	1	1	1	1	1	1	1	1	1	1	1	1	1	1	1	1	1	1	1	1	1	1
RAC875_c6905_776	1B	218.35	3	3	3	3	3	3	3	1	3	3	3	3	3	3	3	1	3	3	3	3	1	3	3	3	1	3	3	3	3	3	3	3	3	3	3	3	3	3	3	3	3	3	3	3	3	3	3
RAC875_rep_c71685_445	1B	218.35	1	1	1	1	1	1	1	3	1	1	1	1	1	1	1	3	1	1	1	1	3	1	1	1	3	1	1	1	1	1	1	1	1	1	1	1	1	1	1	1	1	1	1	1	1	1	1
Tdurum_contig25434_209	1B	218.35	3	3	3	3	3	3	3	1	3	3	3	3	3	3	3	1	3	3	3	3	1	3	3	3	1	3	3	3	3	3	3	3	3	3	3	3	3	3	3	3	3	3	3	3	3	3	3
Tdurum_contig25434_218	1B	218.35	3	3	3	3	3	3	3	1	3	3	3	3	3	3	3	1	3	3	3	3	1	3	3	3	1	3	3	3	3	3	3	3	3	3	3	3	3	3	3	3	3	3	3	3	3	3	3
Tdurum_contig28530_380	1B	218.35	3	3	3	3	3	3	3	3	3	3	3	3	3	3	3	3	3	3	3	3	3	3	3	3	3	3	3	3	3	3	3	3	3	3	3	3	3	3	3	3	3	3	3	3	3	3	3
Tdurum_contig29676_141	1B	218.35	3	3	3	3	3	3	3	3	3	3	3	3	3	3	3	1	3	3	3	3	1	3	3	3	1	3	3	3	3	3	3	3	3	3	3	3	3	3	3	3	3	3	3	3	3	3	3
Tdurum_contig32033_125	1B	218.35	3	3	3	3	3	3	3	3	3	3	3	3	3	3	3	1	3	3	3	3	1	3	3	3	1	3	3	3	3	3	3	3	3	3	3	3	3	3	3	3	3	3	3	3	3	3	3
Tdurum_contig32033_334	1B	218.35	1	1	1	1	1	1	1	1	1	1	1	1	1	1	1	3	1	1	1	1	3	1	1	1	3	1	1	1	1	1	1	1	1	1	1	1	1	1	1	1	1	1	1	1	1	1	1
Tdurum_contig48171_189	1B	218.35	3	1	3	3	3	3	3	3	3	1	3	3	3	3	3	3	3	1	3	1	3	3	3	3	3	3	3	3	3	1	3	3	3	3	3	3	3	3	3	3	3	3	3	3	3	3	3
Tdurum_contig57731_162	1B	218.35	1	1	1	1	1	1	1	3	1	1	1	1	1	1	1	3	1	1	1	1	3	1	1	1	3	1	1	1	1	1	1	1	1	1	1	1	1	1	1	1	1	1	1	1	1	1	1
Tdurum_contig57731_225	1B	218.35	3	3	3	3	3	3	3	1	3	3	3	3	3	3	3	1	3	3	3	3	1	3	3	3	1	3	3	3	3	3	3	3	3	3	3	3	3	3	3	3	3	3	3	3	3	3	3
tplb0058h11_348	1B	218.35	3	3	3	3	3	3	3	1	3	3	3	3	3	3	3	1	3	3	3	3	1	3	3	3	1	3	3	3	3	3	3	3	3	3	3	3	3	3	3	3	3	3	3	3	3	3	3
[truncated: 20,476 more rows]
[truncated: 423 more columns]

## Sheet: Legend
Supplementary Table 3. Genotypic data derived from the use of the wheat 90k Illumina iSelect single nucleotide polymorphism (SNP) array (Wang et al. 2014) across the association mapping panel of 470 accessions. Chromosome and genetic position (cM) of the subset of 18,895 SNPs located on the previously published wheat consensus map (Wang et al. 2014) are indicated. NA = not on the Wang et al. (201…
